# Supplementary material for: DoxoDB: A Database for the Expression Analysis of Doxorubicin-Induced lncRNA Genes
Source: Noncoding RNA. 2023 Jul 13;9(4):39. doi: 10.3390/ncrna9040039 (PMC10366827; doi:10.3390/ncrna9040039)
Supplement: Supplementary file 1 [file ncrna-09-00039-s001.zip › Supplementary_Tables.xlsx]

## Sheet: Table_S1
Supplementary Table S1. List of differentially expressed protein-coding and lncRNA genes in DOX-treated cells compared to the control cells (GSE154101).
Ensembl_ID	Gene_symbol	Biotype	Differential_Expression	logFC	FDR
ENSG00000185668	POU3F1	Protein_Coding	Up-regulated	8.04754	7.88e-22
ENSG00000163347	CLDN1	Protein_Coding	Up-regulated	8.24806	2.03e-21
ENSG00000135423	GLS2	Protein_Coding	Up-regulated	8.9413	6.83e-21
ENSG00000065320	NTN1	Protein_Coding	Up-regulated	7.90867	6.73e-18
ENSG00000138271	GPR87	Protein_Coding	Up-regulated	9.42927	8.85e-15
ENSG00000115884	SDC1	Protein_Coding	Up-regulated	5.03705	1.08e-14
ENSG00000173535	TNFRSF10C	Protein_Coding	Up-regulated	5.93284	1.76e-14
ENSG00000154040	CABYR	Protein_Coding	Up-regulated	5.35716	1.18e-13
ENSG00000187017	ESPN	Protein_Coding	Up-regulated	7.70918	2.37e-13
ENSG00000055163	CYFIP2	Protein_Coding	Up-regulated	4.3682	5.06e-13
ENSG00000182253	SYNM	Protein_Coding	Up-regulated	4.57081	1.09e-12
ENSG00000130513	GDF15	Protein_Coding	Up-regulated	6.46934	4.54e-12
ENSG00000166592	RRAD	Protein_Coding	Up-regulated	4.56932	4.97e-12
ENSG00000110900	TSPAN11	Protein_Coding	Up-regulated	6.98148	7.43e-12
ENSG00000172508	CARNS1	Protein_Coding	Up-regulated	6.92791	7.43e-12
ENSG00000168672	LRATD2	Protein_Coding	Up-regulated	4.76487	2.06e-11
ENSG00000114270	COL7A1	Protein_Coding	Up-regulated	4.70927	2.2e-11
ENSG00000162981	LRATD1	Protein_Coding	Up-regulated	8.81989	3.26e-11
ENSG00000095397	WHRN	Protein_Coding	Up-regulated	4.69513	1.22e-10
ENSG00000161513	FDXR	Protein_Coding	Up-regulated	4.01397	1.22e-10
ENSG00000088836	SLC4A11	Protein_Coding	Up-regulated	4.70258	1.25e-10
ENSG00000253736	ENSG00000253736	lncRNA	Up-regulated	8.50585	1.76e-10
ENSG00000104689	TNFRSF10A	Protein_Coding	Up-regulated	4.07686	2.05e-10
ENSG00000121552	CSTA	Protein_Coding	Up-regulated	7.01633	2.73e-10
ENSG00000069812	HES2	Protein_Coding	Up-regulated	4.54984	9.4e-10
ENSG00000151640	DPYSL4	Protein_Coding	Up-regulated	3.81526	1.46e-09
ENSG00000168621	GDNF	Protein_Coding	Up-regulated	6.16261	5.07e-09
ENSG00000172828	CES3	Protein_Coding	Up-regulated	6.85802	5.07e-09
ENSG00000245848	CEBPA	Protein_Coding	Up-regulated	6.49057	9.53e-09
ENSG00000289047	ENSG00000289047	lncRNA	Up-regulated	3.73213	1.6e-08
ENSG00000089486	CDIP1	Protein_Coding	Up-regulated	3.77146	2.02e-08
ENSG00000242732	RTL5	Protein_Coding	Up-regulated	4.18808	2.02e-08
ENSG00000224294	PINCR	lncRNA	Up-regulated	12.4443	2.57e-08
ENSG00000095713	CRTAC1	Protein_Coding	Up-regulated	8.04869	3.28e-08
ENSG00000162772	ATF3	Protein_Coding	Up-regulated	4.10254	4.28e-08
ENSG00000177106	EPS8L2	Protein_Coding	Up-regulated	3.38559	4.28e-08
ENSG00000128342	LIF	Protein_Coding	Up-regulated	5.63826	4.9e-08
ENSG00000158406	H4C8	Protein_Coding	Up-regulated	3.44738	5.32e-08
ENSG00000125657	TNFSF9	Protein_Coding	Up-regulated	5.12539	6.26e-08
ENSG00000161509	GRIN2C	Protein_Coding	Up-regulated	7.17875	6.62e-08
ENSG00000165799	RNASE7	Protein_Coding	Up-regulated	11.1476	6.62e-08
ENSG00000278828	H3C10	Protein_Coding	Up-regulated	4.40812	6.73e-08
ENSG00000158055	GRHL3	Protein_Coding	Up-regulated	9.1981	8.16e-08
ENSG00000161642	ZNF385A	Protein_Coding	Up-regulated	3.7153	8.99e-08
ENSG00000078237	TIGAR	Protein_Coding	Up-regulated	3.20886	1.24e-07
ENSG00000177595	PIDD1	Protein_Coding	Up-regulated	3.2399	1.24e-07
ENSG00000144485	HES6	Protein_Coding	Up-regulated	4.74432	1.58e-07
ENSG00000198589	LRBA	Protein_Coding	Down-regulated	-3.23182	1.87e-07
ENSG00000291006	ENSG00000291006	lncRNA	Up-regulated	3.84958	1.91e-07
ENSG00000277224	H2BC7	Protein_Coding	Up-regulated	6.87356	2.06e-07
ENSG00000185860	CCDC190	Protein_Coding	Up-regulated	4.23895	2.64e-07
ENSG00000132819	RBM38	Protein_Coding	Up-regulated	3.29797	3.08e-07
ENSG00000165985	C1QL3	Protein_Coding	Up-regulated	10.7694	3.08e-07
ENSG00000273802	H2BC8	Protein_Coding	Up-regulated	4.88232	3.98e-07
ENSG00000168394	TAP1	Protein_Coding	Up-regulated	3.05753	5.53e-07
ENSG00000277075	H2AC8	Protein_Coding	Up-regulated	5.27547	5.89e-07
ENSG00000104892	KLC3	Protein_Coding	Up-regulated	8.55662	6.22e-07
ENSG00000171246	NPTX1	Protein_Coding	Up-regulated	5.56417	6.29e-07
ENSG00000229021	ENSG00000229021	lncRNA	Up-regulated	10.5391	6.3e-07
ENSG00000087085	ACHE	Protein_Coding	Up-regulated	4.91856	7.62e-07
ENSG00000119630	PGF	Protein_Coding	Up-regulated	4.94097	7.78e-07
ENSG00000121690	DEPDC7	Protein_Coding	Up-regulated	3.57773	9.23e-07
ENSG00000214513	NOTO	Protein_Coding	Up-regulated	8.36123	1.07e-06
ENSG00000160606	TLCD1	Protein_Coding	Up-regulated	3.29984	1.25e-06
ENSG00000285244	DINOL	lncRNA	Up-regulated	9.03039	1.27e-06
ENSG00000224592	MIR3659HG	lncRNA	Up-regulated	10.3969	1.48e-06
ENSG00000286034	ENSG00000286034	lncRNA	Up-regulated	6.54044	1.5e-06
ENSG00000151468	CCDC3	Protein_Coding	Up-regulated	5.87884	1.67e-06
ENSG00000189275	LINC01164	lncRNA	Up-regulated	10.39	1.81e-06
ENSG00000144452	ABCA12	Protein_Coding	Up-regulated	8.86748	1.88e-06
ENSG00000188916	INSYN2A	Protein_Coding	Up-regulated	5.80014	2.34e-06
ENSG00000172831	CES2	Protein_Coding	Up-regulated	3.20375	4.7e-06
ENSG00000168748	CA7	Protein_Coding	Up-regulated	9.94318	4.78e-06
ENSG00000115129	TP53I3	Protein_Coding	Up-regulated	3.69884	5.66e-06
ENSG00000177076	ACER2	Protein_Coding	Up-regulated	3.68636	5.66e-06
ENSG00000258602	LINC01629	lncRNA	Up-regulated	9.97718	7.38e-06
ENSG00000173846	PLK3	Protein_Coding	Up-regulated	2.72632	7.99e-06
ENSG00000226935	LINC00161	lncRNA	Up-regulated	8.03246	9.74e-06
ENSG00000277287	ENSG00000277287	lncRNA	Up-regulated	5.20992	1.32e-05
ENSG00000240891	PLCXD2	Protein_Coding	Up-regulated	3.86609	1.4e-05
ENSG00000144339	TMEFF2	Protein_Coding	Up-regulated	6.20796	1.5e-05
ENSG00000111981	ULBP1	Protein_Coding	Up-regulated	5.24918	1.69e-05
ENSG00000229544	NKX1-2	Protein_Coding	Up-regulated	9.38333	1.84e-05
ENSG00000105327	BBC3	Protein_Coding	Up-regulated	2.79968	2.05e-05
ENSG00000132646	PCNA	Protein_Coding	Up-regulated	3.09311	2.22e-05
ENSG00000260912	ENSG00000260912	lncRNA	Up-regulated	3.78153	2.48e-05
ENSG00000142619	PADI3	Protein_Coding	Up-regulated	8.68637	2.53e-05
ENSG00000151131	NOPCHAP1	Protein_Coding	Up-regulated	3.12204	3.34e-05
ENSG00000266680	ENSG00000266680	lncRNA	Up-regulated	3.61594	3.4e-05
ENSG00000235010	JAKMIP3-AS1	lncRNA	Up-regulated	10.6195	3.7e-05
ENSG00000184678	H2BC21	Protein_Coding	Up-regulated	2.80386	3.71e-05
ENSG00000152137	HSPB8	Protein_Coding	Up-regulated	2.82518	3.8e-05
ENSG00000121039	RDH10	Protein_Coding	Up-regulated	2.64056	4.07e-05
ENSG00000134574	DDB2	Protein_Coding	Up-regulated	2.76954	4.15e-05
ENSG00000274180	NATD1	Protein_Coding	Up-regulated	2.675	4.28e-05
ENSG00000184486	POU3F2	Protein_Coding	Up-regulated	7.54433	4.64e-05
ENSG00000164778	EN2	Protein_Coding	Up-regulated	6.8152	4.79e-05
ENSG00000126861	OMG	Protein_Coding	Up-regulated	10.2005	5.95e-05
ENSG00000289426	ENSG00000289426	lncRNA	Up-regulated	8.05237	6.3e-05
ENSG00000171469	ZNF561	Protein_Coding	Up-regulated	2.6087	6.56e-05
ENSG00000156574	NODAL	Protein_Coding	Up-regulated	9.1564	7e-05
ENSG00000137975	CLCA2	Protein_Coding	Up-regulated	6.70571	7.33e-05
ENSG00000205592	MUC19	Protein_Coding	Up-regulated	9.98063	7.33e-05
ENSG00000187714	SLC18A3	Protein_Coding	Up-regulated	5.44635	7.59e-05
ENSG00000138622	HCN4	Protein_Coding	Up-regulated	6.40048	7.61e-05
ENSG00000226005	LINC02660	lncRNA	Up-regulated	9.70644	7.61e-05
ENSG00000168061	SAC3D1	Protein_Coding	Up-regulated	2.83182	8.42e-05
ENSG00000136378	ADAMTS7	Protein_Coding	Up-regulated	2.51317	8.6e-05
ENSG00000119121	TRPM6	Protein_Coding	Up-regulated	8.83664	8.64e-05
ENSG00000272081	FCHO2-DT	lncRNA	Up-regulated	6.03357	9.43e-05
ENSG00000119986	AVPI1	Protein_Coding	Up-regulated	3.0498	0.000110978
ENSG00000010030	ETV7	Protein_Coding	Up-regulated	6.44706	0.000112983
ENSG00000174460	ZCCHC12	Protein_Coding	Up-regulated	8.11997	0.000118084
ENSG00000162892	IL24	Protein_Coding	Up-regulated	6.7885	0.000118782
ENSG00000197093	GAL3ST4	Protein_Coding	Up-regulated	3.94407	0.000129443
ENSG00000041515	MYO16	Protein_Coding	Up-regulated	8.54458	0.000134384
ENSG00000230109	LINC02643	lncRNA	Up-regulated	8.82075	0.000142597
ENSG00000080644	CHRNA3	Protein_Coding	Up-regulated	8.50959	0.000143162
ENSG00000103742	IGDCC4	Protein_Coding	Up-regulated	5.40345	0.000143162
ENSG00000176890	TYMS	Protein_Coding	Up-regulated	2.58308	0.000143162
ENSG00000278041	ENSG00000278041	lncRNA	Up-regulated	7.09692	0.000146376
ENSG00000189120	SP6	Protein_Coding	Up-regulated	6.11292	0.000147861
ENSG00000100290	BIK	Protein_Coding	Up-regulated	8.81946	0.00015098
ENSG00000168497	CAVIN2	Protein_Coding	Up-regulated	2.37555	0.000167608
ENSG00000183114	FAM43B	Protein_Coding	Up-regulated	4.61048	0.000168313
ENSG00000124635	H2BC11	Protein_Coding	Up-regulated	3.3487	0.000175961
ENSG00000114656	CFAP92	Protein_Coding	Up-regulated	7.0101	0.000178797
ENSG00000131864	USP29	Protein_Coding	Up-regulated	9.40578	0.000178797
ENSG00000159388	BTG2	Protein_Coding	Up-regulated	3.13281	0.000181025
ENSG00000083812	ZNF324	Protein_Coding	Up-regulated	2.72023	0.000182903
ENSG00000236908	LINC02827	lncRNA	Up-regulated	8.55104	0.000182903
ENSG00000285911	ENSG00000285911	lncRNA	Up-regulated	8.38226	0.000190488
ENSG00000182704	TSKU	Protein_Coding	Up-regulated	2.49388	0.00019176
ENSG00000140511	HAPLN3	Protein_Coding	Up-regulated	3.63962	0.000193647
ENSG00000272157	ENSG00000272157	lncRNA	Up-regulated	8.42651	0.000200278
ENSG00000204103	MAFB	Protein_Coding	Up-regulated	4.05519	0.000206362
ENSG00000182759	MAFA	Protein_Coding	Up-regulated	5.28145	0.000217455
ENSG00000272841	MAP3K4-AS1	lncRNA	Up-regulated	4.24225	0.000218503
ENSG00000175197	DDIT3	Protein_Coding	Up-regulated	2.41049	0.000228309
ENSG00000162552	WNT4	Protein_Coding	Up-regulated	6.57188	0.000229956
ENSG00000175556	LONRF3	Protein_Coding	Up-regulated	6.79038	0.000229956
ENSG00000277586	NEFL	Protein_Coding	Up-regulated	6.98232	0.000236252
ENSG00000175868	CALCB	Protein_Coding	Up-regulated	6.55767	0.000246612
ENSG00000162643	DNAI3	Protein_Coding	Up-regulated	4.82432	0.000248237
ENSG00000105650	PDE4C	Protein_Coding	Up-regulated	6.49139	0.000279379
ENSG00000226887	ERVMER34-1	Protein_Coding	Up-regulated	7.00005	0.000280138
ENSG00000203697	CAPN8	Protein_Coding	Up-regulated	8.43821	0.000280995
ENSG00000250041	ENSG00000250041	lncRNA	Up-regulated	7.44997	0.000280995
ENSG00000143816	WNT9A	Protein_Coding	Up-regulated	3.87943	0.000292272
ENSG00000169297	NR0B1	Protein_Coding	Up-regulated	6.56504	0.000294665
ENSG00000227748	ENSG00000227748	lncRNA	Up-regulated	5.92767	0.000294665
ENSG00000112183	RBM24	Protein_Coding	Up-regulated	7.01094	0.000299941
ENSG00000133101	CCNA1	Protein_Coding	Up-regulated	3.08785	0.000299941
ENSG00000183273	CCDC60	Protein_Coding	Up-regulated	8.85158	0.000307442
ENSG00000253438	PCAT1	lncRNA	Up-regulated	8.32579	0.000311893
ENSG00000182687	GALR2	Protein_Coding	Up-regulated	5.53502	0.000318742
ENSG00000111674	ENO2	Protein_Coding	Down-regulated	-2.44631	0.000331646
ENSG00000142609	CFAP74	Protein_Coding	Up-regulated	10.9302	0.000331646
ENSG00000180155	LYNX1	Protein_Coding	Up-regulated	3.28413	0.000338996
ENSG00000134917	ADAMTS8	Protein_Coding	Up-regulated	8.4669	0.000343191
ENSG00000103056	SMPD3	Protein_Coding	Up-regulated	6.66196	0.000359716
ENSG00000123243	ITIH5	Protein_Coding	Up-regulated	8.27848	0.000360885
ENSG00000173068	BNC2	Protein_Coding	Down-regulated	-2.78216	0.00038149
ENSG00000133812	SBF2	Protein_Coding	Down-regulated	-2.53029	0.000386015
ENSG00000164294	GPX8	Protein_Coding	Down-regulated	-2.37099	0.000393208
ENSG00000291189	ENSG00000291189	lncRNA	Up-regulated	6.05572	0.000396606
ENSG00000081181	ARG2	Protein_Coding	Up-regulated	3.16493	0.000418337
ENSG00000166145	SPINT1	Protein_Coding	Up-regulated	3.89736	0.000429569
ENSG00000132549	VPS13B	Protein_Coding	Down-regulated	-2.44594	0.000462948
ENSG00000184434	LRRC19	Protein_Coding	Up-regulated	8.02515	0.000462948
ENSG00000196517	SLC6A9	Protein_Coding	Up-regulated	2.42869	0.000466623
ENSG00000196092	PAX5	Protein_Coding	Up-regulated	7.91119	0.000480382
ENSG00000196734	LCE1B	Protein_Coding	Up-regulated	9.38465	0.000480565
ENSG00000132517	SLC52A1	Protein_Coding	Up-regulated	9.19712	0.000500088
ENSG00000142627	EPHA2	Protein_Coding	Up-regulated	2.57217	0.000515241
ENSG00000271926	ENSG00000271926	lncRNA	Up-regulated	5.44386	0.000534414
ENSG00000289501	ENSG00000289501	lncRNA	Up-regulated	8.37037	0.000539725
ENSG00000152642	GPD1L	Protein_Coding	Up-regulated	2.39384	0.000560136
ENSG00000187140	FOXD3	Protein_Coding	Up-regulated	6.225	0.000563743
ENSG00000187091	PLCD1	Protein_Coding	Up-regulated	2.1982	0.00057963
ENSG00000115525	ST3GAL5	Protein_Coding	Down-regulated	-2.22705	0.00058326
ENSG00000143921	ABCG8	Protein_Coding	Up-regulated	8.06982	0.000603654
ENSG00000110375	UPK2	Protein_Coding	Up-regulated	5.75231	0.000613555
ENSG00000121075	TBX4	Protein_Coding	Up-regulated	7.79041	0.000613555
ENSG00000251095	ENSG00000251095	lncRNA	Up-regulated	5.33985	0.000613555
ENSG00000164070	HSPA4L	Protein_Coding	Up-regulated	2.4065	0.000645245
ENSG00000287555	ENSG00000287555	lncRNA	Up-regulated	7.86682	0.000645245
ENSG00000248243	LINC02014	lncRNA	Up-regulated	8.56113	0.000650056
ENSG00000081237	PTPRC	Protein_Coding	Up-regulated	8.07063	0.000650424
ENSG00000171234	UGT2B7	Protein_Coding	Up-regulated	9.468	0.000662762
ENSG00000090534	THPO	Protein_Coding	Up-regulated	7.80508	0.000680792
ENSG00000244509	APOBEC3C	Protein_Coding	Up-regulated	2.43058	0.000684444
ENSG00000257953	ENSG00000257953	lncRNA	Up-regulated	5.52213	0.000684444
ENSG00000124440	HIF3A	Protein_Coding	Down-regulated	-4.11421	0.00072617
ENSG00000177551	NHLH2	Protein_Coding	Up-regulated	7.34531	0.000733667
ENSG00000179630	LACC1	Protein_Coding	Up-regulated	2.3369	0.000733667
ENSG00000291144	ENSG00000291144	lncRNA	Up-regulated	7.68495	0.000733667
ENSG00000148584	A1CF	Protein_Coding	Up-regulated	7.70781	0.000744079
ENSG00000145040	UCN2	Protein_Coding	Up-regulated	5.13424	0.000745316
ENSG00000147536	GINS4	Protein_Coding	Up-regulated	2.75484	0.000745316
ENSG00000178726	THBD	Protein_Coding	Up-regulated	2.6036	0.000745316
ENSG00000198948	MFAP3L	Protein_Coding	Up-regulated	3.39753	0.000755883
ENSG00000244649	LINC02086	lncRNA	Up-regulated	6.35376	0.000801633
ENSG00000144285	SCN1A	Protein_Coding	Up-regulated	7.57771	0.000856433
ENSG00000234432	LINC02983	lncRNA	Up-regulated	5.10415	0.000856433
ENSG00000287712	ENSG00000287712	lncRNA	Up-regulated	6.19491	0.000856433
ENSG00000102539	MLNR	Protein_Coding	Up-regulated	8.69776	0.000857711
ENSG00000123700	KCNJ2	Protein_Coding	Up-regulated	5.24713	0.000867393
ENSG00000187837	H1-2	Protein_Coding	Up-regulated	2.34112	0.000867393
ENSG00000001626	CFTR	Protein_Coding	Up-regulated	7.54603	0.000870166
ENSG00000132205	EMILIN2	Protein_Coding	Up-regulated	3.52816	0.000880342
ENSG00000261618	LINC02605	lncRNA	Up-regulated	7.75337	0.000880342
ENSG00000257839	PHLDA1-DT	lncRNA	Up-regulated	6.37808	0.000900617
ENSG00000286048	ENSG00000286048	lncRNA	Up-regulated	5.32553	0.00090444
ENSG00000236581	STARD13-AS	lncRNA	Up-regulated	7.49263	0.000906743
ENSG00000165891	E2F7	Protein_Coding	Up-regulated	3.23286	0.000931759
ENSG00000175352	NRIP3	Protein_Coding	Up-regulated	2.87216	0.000939017
ENSG00000198074	AKR1B10	Protein_Coding	Up-regulated	3.88083	0.000939017
ENSG00000164283	ESM1	Protein_Coding	Up-regulated	4.20623	0.000957072
ENSG00000232892	RGS5-AS1	lncRNA	Up-regulated	7.54053	0.000964513
ENSG00000152192	POU4F1	Protein_Coding	Up-regulated	6.83045	0.000979152
ENSG00000288787	ENSG00000288787	lncRNA	Up-regulated	8.15782	0.000979152
ENSG00000186994	KANK3	Protein_Coding	Up-regulated	4.89563	0.000999451
ENSG00000255717	SNHG1	lncRNA	Up-regulated	2.18253	0.00101233
ENSG00000235885	LINC01828	lncRNA	Up-regulated	5.78413	0.00103339
ENSG00000090539	CHRD	Protein_Coding	Up-regulated	4.8925	0.00103649
ENSG00000277196	PRODH	Protein_Coding	Up-regulated	8.35687	0.00103649
ENSG00000183784	DOCK8-AS1	lncRNA	Up-regulated	6.5754	0.00103938
ENSG00000109163	GNRHR	Protein_Coding	Up-regulated	7.45599	0.00104449
ENSG00000224116	INHBA-AS1	lncRNA	Up-regulated	7.51029	0.00104667
ENSG00000224666	ETV7-AS1	lncRNA	Up-regulated	7.45136	0.00108062
ENSG00000277363	SRCIN1	Protein_Coding	Up-regulated	5.21233	0.00108741
ENSG00000188641	DPYD	Protein_Coding	Down-regulated	-2.30434	0.00115276
ENSG00000187013	LINC02875	lncRNA	Up-regulated	5.41736	0.00117611
ENSG00000223573	TINCR	Protein_Coding	Up-regulated	4.58042	0.00119041
ENSG00000184602	SNN	Protein_Coding	Up-regulated	2.31524	0.00119764
ENSG00000248429	GASK1B-AS1	lncRNA	Up-regulated	3.98887	0.00119764
ENSG00000171540	OTP	Protein_Coding	Up-regulated	7.41798	0.00121273
ENSG00000102554	KLF5	Protein_Coding	Up-regulated	2.39249	0.0012178
ENSG00000178184	PARD6G	Protein_Coding	Up-regulated	3.29433	0.0012178
ENSG00000029534	ANK1	Protein_Coding	Up-regulated	4.44944	0.00121812
ENSG00000030304	MUSK	Protein_Coding	Up-regulated	5.71251	0.00121812
ENSG00000124657	OR2B6	Protein_Coding	Up-regulated	5.78114	0.00121812
ENSG00000145012	LPP	Protein_Coding	Down-regulated	-2.38055	0.00121812
ENSG00000231394	ENSG00000231394	lncRNA	Up-regulated	7.46064	0.00121812
ENSG00000262179	MYMX	Protein_Coding	Up-regulated	6.89935	0.00121812
ENSG00000288956	ENSG00000288956	lncRNA	Up-regulated	6.09111	0.00121812
ENSG00000039068	CDH1	Protein_Coding	Up-regulated	7.42862	0.0012232
ENSG00000198854	C1orf68	Protein_Coding	Up-regulated	8.57942	0.0012279
ENSG00000156486	KCNS2	Protein_Coding	Up-regulated	5.70474	0.00124477
ENSG00000102387	TAF7L	Protein_Coding	Up-regulated	4.88667	0.00124775
ENSG00000112773	TENT5A	Protein_Coding	Up-regulated	2.32338	0.00124775
ENSG00000163071	SPATA18	Protein_Coding	Up-regulated	2.41819	0.00124775
ENSG00000265763	ZNF488	Protein_Coding	Up-regulated	5.53415	0.00124775
ENSG00000279182	ENSG00000279182	lncRNA	Up-regulated	7.59163	0.00124775
ENSG00000173404	INSM1	Protein_Coding	Up-regulated	8.60275	0.00130471
ENSG00000248996	PDLIM7-AS1	lncRNA	Up-regulated	7.97651	0.00131582
ENSG00000196787	H2AC11	Protein_Coding	Up-regulated	4.01416	0.0013183
ENSG00000268812	LIF-AS2	lncRNA	Up-regulated	6.07353	0.00135492
ENSG00000182366	FAM87A	lncRNA	Up-regulated	7.28791	0.00136299
ENSG00000100298	APOBEC3H	Protein_Coding	Up-regulated	6.53399	0.00138872
ENSG00000101438	SLC32A1	Protein_Coding	Up-regulated	7.82031	0.00138872
ENSG00000107187	LHX3	Protein_Coding	Up-regulated	6.05095	0.00138872
ENSG00000136011	STAB2	Protein_Coding	Up-regulated	7.46299	0.00138872
ENSG00000183696	UPP1	Protein_Coding	Up-regulated	2.61219	0.00149303
ENSG00000226985	LINC01203	lncRNA	Up-regulated	6.30688	0.00151464
ENSG00000167034	NKX3-1	Protein_Coding	Up-regulated	2.75924	0.00154509
ENSG00000073861	TBX21	Protein_Coding	Up-regulated	8.15466	0.00160037
ENSG00000187416	LHFPL3	Protein_Coding	Up-regulated	7.22012	0.00160213
ENSG00000278705	H4C2	Protein_Coding	Up-regulated	7.67055	0.00161188
ENSG00000222047	C10orf55	lncRNA	Up-regulated	7.35007	0.00162675
ENSG00000160216	AGPAT3	Protein_Coding	Down-regulated	-2.08143	0.00164956
ENSG00000106078	COBL	Protein_Coding	Up-regulated	7.22145	0.00165032
ENSG00000186766	FOXI2	Protein_Coding	Up-regulated	7.28276	0.0016934
ENSG00000237512	UNC5B-AS1	lncRNA	Up-regulated	5.16776	0.0016934
ENSG00000104093	DMXL2	Protein_Coding	Down-regulated	-2.45784	0.0017213
ENSG00000095970	TREM2	Protein_Coding	Up-regulated	8.94134	0.00172463
ENSG00000153820	SPHKAP	Protein_Coding	Up-regulated	7.55827	0.00172463
ENSG00000164379	FOXQ1	Protein_Coding	Up-regulated	5.92747	0.00172845
ENSG00000027869	SH2D2A	Protein_Coding	Up-regulated	4.85914	0.00173981
ENSG00000065621	GSTO2	Protein_Coding	Up-regulated	3.06937	0.00176033
ENSG00000173805	HAP1	Protein_Coding	Up-regulated	4.34751	0.00176033
ENSG00000100433	KCNK10	Protein_Coding	Up-regulated	7.1782	0.00176806
ENSG00000276241	ENSG00000276241	lncRNA	Up-regulated	8.91843	0.0017732
ENSG00000154016	GRAP	Protein_Coding	Up-regulated	5.18816	0.00180242
ENSG00000287021	ENSG00000287021	lncRNA	Up-regulated	7.41193	0.00180242
ENSG00000076604	TRAF4	Protein_Coding	Up-regulated	2.08236	0.00181691
ENSG00000172575	RASGRP1	Protein_Coding	Up-regulated	4.88023	0.00182094
ENSG00000130768	SMPDL3B	Protein_Coding	Up-regulated	8.42679	0.00182245
ENSG00000103569	AQP9	Protein_Coding	Up-regulated	7.14339	0.00184369
ENSG00000254231	WWP1-AS1	lncRNA	Up-regulated	4.89715	0.00184369
ENSG00000151689	INPP1	Protein_Coding	Up-regulated	2.24635	0.00184996
ENSG00000159708	LRRC36	Protein_Coding	Up-regulated	7.18499	0.00184996
ENSG00000131951	LRRC9	Protein_Coding	Up-regulated	7.3332	0.0018911
ENSG00000131389	SLC6A6	Protein_Coding	Down-regulated	-2.37017	0.00194193
ENSG00000170734	POLH	Protein_Coding	Up-regulated	2.07773	0.00199643
ENSG00000110169	HPX	Protein_Coding	Up-regulated	4.16172	0.00199886
ENSG00000095383	TBC1D2	Protein_Coding	Up-regulated	2.86388	0.00202192
ENSG00000131374	TBC1D5	Protein_Coding	Down-regulated	-2.14785	0.00204324
ENSG00000167992	VWCE	Protein_Coding	Up-regulated	3.71916	0.00205062
ENSG00000272078	ENSG00000272078	lncRNA	Up-regulated	7.10346	0.00206083
ENSG00000143217	NECTIN4	Protein_Coding	Up-regulated	6.80424	0.00206653
ENSG00000104228	TRIM35	Protein_Coding	Up-regulated	2.07148	0.00210884
ENSG00000111249	CUX2	Protein_Coding	Up-regulated	7.33449	0.00210884
ENSG00000136944	LMX1B	Protein_Coding	Up-regulated	7.17408	0.00210884
ENSG00000128594	LRRC4	Protein_Coding	Up-regulated	5.0197	0.00211497
ENSG00000144852	NR1I2	Protein_Coding	Up-regulated	5.88552	0.00212147
ENSG00000186642	PDE2A	Protein_Coding	Up-regulated	4.33966	0.00212583
ENSG00000189410	SH2D5	Protein_Coding	Up-regulated	3.6647	0.00212583
ENSG00000059804	SLC2A3	Protein_Coding	Down-regulated	-2.3356	0.00213435
ENSG00000164938	TP53INP1	Protein_Coding	Up-regulated	2.05232	0.00213435
ENSG00000183560	IZUMO1R	Protein_Coding	Up-regulated	7.67432	0.00213435
ENSG00000232352	SEMA3B-AS1	lncRNA	Up-regulated	7.10629	0.00213435
ENSG00000286259	ENSG00000286259	lncRNA	Up-regulated	7.10629	0.00213435
ENSG00000081479	LRP2	Protein_Coding	Up-regulated	7.40329	0.0021588
ENSG00000179165	PXT1	Protein_Coding	Up-regulated	7.05949	0.0022263
ENSG00000229425	ENSG00000229425	lncRNA	Up-regulated	7.0216	0.00222864
ENSG00000230424	EMC1-AS1	lncRNA	Up-regulated	4.35503	0.00222917
ENSG00000187715	KBTBD12	Protein_Coding	Up-regulated	7.14898	0.0022316
ENSG00000148357	HMCN2	Protein_Coding	Up-regulated	5.89486	0.00224066
ENSG00000289170	ENSG00000289170	lncRNA	Up-regulated	7.61364	0.00227778
ENSG00000172673	THEMIS	Protein_Coding	Up-regulated	5.69611	0.00234268
ENSG00000074803	SLC12A1	Protein_Coding	Up-regulated	7.3358	0.00234826
ENSG00000113946	CLDN16	Protein_Coding	Up-regulated	7.3358	0.00234826
ENSG00000181143	MUC16	Protein_Coding	Up-regulated	7.10916	0.0024373
ENSG00000254415	SIGLEC14	Protein_Coding	Up-regulated	7.61968	0.00244391
ENSG00000174944	P2RY14	Protein_Coding	Up-regulated	6.97811	0.00245008
ENSG00000280744	LINC01173	lncRNA	Up-regulated	7.01715	0.00245008
ENSG00000160917	CPSF4	Protein_Coding	Up-regulated	2.074	0.00249
ENSG00000133131	MORC4	Protein_Coding	Up-regulated	2.49869	0.00251211
ENSG00000223475	VOPP1-DT	lncRNA	Up-regulated	7.22824	0.00251211
ENSG00000265408	ENSG00000265408	lncRNA	Up-regulated	6.98114	0.00251211
ENSG00000285530	ENSG00000285530	lncRNA	Up-regulated	7.02606	0.00251211
ENSG00000289911	ENSG00000289911	lncRNA	Up-regulated	7.17128	0.00251211
ENSG00000258926	ENSG00000258926	lncRNA	Up-regulated	5.60757	0.0025392
ENSG00000165238	WNK2	Protein_Coding	Up-regulated	6.09173	0.00254689
ENSG00000236719	OVAAL	lncRNA	Up-regulated	5.65515	0.00260667
ENSG00000179915	NRXN1	Protein_Coding	Up-regulated	6.97508	0.00261888
ENSG00000163508	EOMES	Protein_Coding	Up-regulated	7.01565	0.00265239
ENSG00000187833	C2orf78	Protein_Coding	Up-regulated	6.98266	0.00265239
ENSG00000158428	CATIP	Protein_Coding	Up-regulated	8.37865	0.00265695
ENSG00000137265	IRF4	Protein_Coding	Up-regulated	7.40029	0.00268743
ENSG00000232774	LINC03033	lncRNA	Up-regulated	3.08346	0.00268743
ENSG00000143674	MAP3K21	Protein_Coding	Up-regulated	4.53632	0.00269735
ENSG00000174038	C9orf131	Protein_Coding	Up-regulated	7.02757	0.00269735
ENSG00000275552	ENSG00000275552	lncRNA	Up-regulated	5.83419	0.00269735
ENSG00000184697	CLDN6	Protein_Coding	Up-regulated	6.13733	0.00270138
ENSG00000198846	TOX	Protein_Coding	Up-regulated	5.23776	0.00270138
ENSG00000132274	TRIM22	Protein_Coding	Up-regulated	2.1064	0.00271922
ENSG00000286339	ENSG00000286339	lncRNA	Up-regulated	6.3143	0.00271922
ENSG00000247095	MIR210HG	lncRNA	Down-regulated	-4.28264	0.00272624
ENSG00000164796	CSMD3	Protein_Coding	Up-regulated	5.83347	0.0027489
ENSG00000288951	ENSG00000288951	lncRNA	Up-regulated	6.93172	0.00277465
ENSG00000152229	PSTPIP2	Protein_Coding	Up-regulated	2.5565	0.0027791
ENSG00000227640	SOX21-AS1	lncRNA	Up-regulated	7.13212	0.00289657
ENSG00000115840	SLC25A12	Protein_Coding	Down-regulated	-2.85066	0.00291163
ENSG00000164181	ELOVL7	Protein_Coding	Up-regulated	5.63998	0.00291163
ENSG00000206075	SERPINB5	Protein_Coding	Up-regulated	7.07118	0.00291163
ENSG00000088992	TESC	Protein_Coding	Up-regulated	7.24108	0.00302621
ENSG00000213722	DDAH2	Protein_Coding	Down-regulated	-2.58378	0.00302621
ENSG00000137491	SLCO2B1	Protein_Coding	Up-regulated	6.93951	0.00305914
ENSG00000166405	RIC3	Protein_Coding	Up-regulated	7.30352	0.00308419
ENSG00000146469	VIP	Protein_Coding	Up-regulated	6.88701	0.00311937
ENSG00000006283	CACNA1G	Protein_Coding	Up-regulated	4.18801	0.00320477
ENSG00000131015	ULBP2	Protein_Coding	Up-regulated	3.45401	0.00320477
ENSG00000154736	ADAMTS5	Protein_Coding	Up-regulated	3.57806	0.0032161
ENSG00000095464	PDE6C	Protein_Coding	Up-regulated	7.23104	0.00324159
ENSG00000144724	PTPRG	Protein_Coding	Down-regulated	-2.06696	0.00325119
ENSG00000181585	TMIE	Protein_Coding	Up-regulated	5.51396	0.00325119
ENSG00000260231	KDM7A-DT	lncRNA	Up-regulated	3.61868	0.00325119
ENSG00000072858	SIDT1	Protein_Coding	Up-regulated	7.0727	0.00328516
ENSG00000081985	IL12RB2	Protein_Coding	Up-regulated	7.03063	0.00328516
ENSG00000125285	SOX21	Protein_Coding	Up-regulated	7.13064	0.00328516
ENSG00000136943	CTSV	Protein_Coding	Up-regulated	3.74472	0.00328516
ENSG00000145743	FBXL17	Protein_Coding	Down-regulated	-2.37056	0.00328516
ENSG00000157851	DPYSL5	Protein_Coding	Up-regulated	7.03063	0.00328516
ENSG00000158486	DNAH3	Protein_Coding	Up-regulated	6.94109	0.00328516
ENSG00000204661	C5orf60	lncRNA	Up-regulated	7.13064	0.00328516
ENSG00000254275	LINC00824	lncRNA	Up-regulated	7.03063	0.00328516
ENSG00000270076	ENSG00000270076	lncRNA	Up-regulated	5.20714	0.00328516
ENSG00000224939	LINC00184	lncRNA	Up-regulated	6.84087	0.00329933
ENSG00000236700	LINC01010	lncRNA	Up-regulated	6.09279	0.00333171
ENSG00000066405	CLDN18	Protein_Coding	Up-regulated	5.49673	0.00335445
ENSG00000221852	KRTAP1-5	Protein_Coding	Up-regulated	5.75817	0.00335445
ENSG00000090020	SLC9A1	Protein_Coding	Up-regulated	2.40436	0.00338547
ENSG00000121966	CXCR4	Protein_Coding	Up-regulated	6.10141	0.00341043
ENSG00000172987	HPSE2	Protein_Coding	Up-regulated	6.98733	0.00342058
ENSG00000235538	ENSG00000235538	lncRNA	Up-regulated	6.98733	0.00342058
ENSG00000179163	FUCA1	Protein_Coding	Up-regulated	2.10187	0.00342521
ENSG00000186047	DLEU7	Protein_Coding	Up-regulated	7.33978	0.00342521
ENSG00000186479	RGS7BP	Protein_Coding	Up-regulated	7.23967	0.00343119
ENSG00000255571	MIR9-3HG	lncRNA	Up-regulated	5.67715	0.00343271
ENSG00000122012	SV2C	Protein_Coding	Up-regulated	6.84577	0.00349632
ENSG00000103723	AP3B2	Protein_Coding	Up-regulated	4.5761	0.00352394
ENSG00000287134	ENSG00000287134	lncRNA	Up-regulated	7.01101	0.00363248
ENSG00000196335	STK31	Protein_Coding	Up-regulated	6.83758	0.00367176
ENSG00000132465	JCHAIN	Protein_Coding	Up-regulated	5.95083	0.00369406
ENSG00000131558	EXOC4	Protein_Coding	Down-regulated	-1.94444	0.00372477
ENSG00000137843	PAK6	Protein_Coding	Up-regulated	5.74134	0.00386868
ENSG00000129682	FGF13	Protein_Coding	Up-regulated	7.27331	0.0039356
ENSG00000197893	NRAP	Protein_Coding	Up-regulated	6.89666	0.0039356
ENSG00000267107	PCAT19	lncRNA	Up-regulated	5.52448	0.0039356
ENSG00000268658	LINC00664	lncRNA	Up-regulated	5.72558	0.0039356
ENSG00000287561	ENSG00000287561	lncRNA	Up-regulated	7.30753	0.0039356
ENSG00000171126	KCNG3	Protein_Coding	Up-regulated	5.82987	0.00396606
ENSG00000187240	DYNC2H1	Protein_Coding	Down-regulated	-2.22688	0.00397799
ENSG00000118492	ADGB	Protein_Coding	Up-regulated	6.74385	0.00414439
ENSG00000164512	ANKRD55	Protein_Coding	Up-regulated	6.74385	0.0041456
ENSG00000170209	ANKK1	Protein_Coding	Up-regulated	5.16179	0.00418459
ENSG00000115008	IL1A	Protein_Coding	Up-regulated	3.92012	0.00420398
ENSG00000148541	FAM13C	Protein_Coding	Up-regulated	3.70273	0.00423631
ENSG00000138646	HERC5	Protein_Coding	Up-regulated	4.61084	0.00425302
ENSG00000131979	GCH1	Protein_Coding	Up-regulated	3.00091	0.00432175
ENSG00000204175	GPRIN2	Protein_Coding	Up-regulated	5.44415	0.00447002
ENSG00000235724	PSMD14-DT	lncRNA	Up-regulated	6.7473	0.00448199
ENSG00000121101	TEX14	Protein_Coding	Up-regulated	5.12405	0.00451884
ENSG00000180532	ZSCAN4	Protein_Coding	Up-regulated	6.23341	0.00453898
ENSG00000204947	ZNF425	Protein_Coding	Up-regulated	2.68679	0.00458009
ENSG00000159339	PADI4	Protein_Coding	Up-regulated	6.99055	0.00458283
ENSG00000170385	SLC30A1	Protein_Coding	Up-regulated	2.46726	0.00458283
ENSG00000289298	ENSG00000289298	lncRNA	Up-regulated	5.20863	0.00468678
ENSG00000287763	ENSG00000287763	lncRNA	Up-regulated	4.53338	0.00469784
ENSG00000150893	FREM2	Protein_Coding	Up-regulated	6.691	0.00471181
ENSG00000145832	SLC25A48	Protein_Coding	Up-regulated	6.85081	0.00472454
ENSG00000258535	ENSG00000258535	lncRNA	Up-regulated	6.85081	0.00472454
ENSG00000005073	HOXA11	Protein_Coding	Up-regulated	7.7883	0.00478718
ENSG00000233695	GAS6-AS1	lncRNA	Up-regulated	3.7457	0.00479704
ENSG00000289168	ENSG00000289168	lncRNA	Up-regulated	6.74905	0.00484165
ENSG00000118946	PCDH17	Protein_Coding	Up-regulated	6.05388	0.0048701
ENSG00000274578	ENSG00000274578	lncRNA	Up-regulated	7.08877	0.0048701
ENSG00000185070	FLRT2	Protein_Coding	Up-regulated	2.00807	0.00517342
ENSG00000198538	ZNF28	Protein_Coding	Up-regulated	2.11659	0.00517342
ENSG00000152208	GRID2	Protein_Coding	Up-regulated	6.73689	0.00517433
ENSG00000204666	ZNF473CR	lncRNA	Up-regulated	5.32239	0.00517433
ENSG00000230798	FOXD3-AS1	lncRNA	Up-regulated	5.39357	0.00517433
ENSG00000287535	ENSG00000287535	lncRNA	Up-regulated	6.73689	0.00517433
ENSG00000181218	H2AC25	Protein_Coding	Up-regulated	2.79833	0.00521511
ENSG00000104537	ANXA13	Protein_Coding	Up-regulated	6.90004	0.00522847
ENSG00000230426	LINC01036	lncRNA	Up-regulated	6.90004	0.00522847
ENSG00000134198	TSPAN2	Protein_Coding	Up-regulated	5.60815	0.00522997
ENSG00000007062	PROM1	Protein_Coding	Up-regulated	6.69633	0.00535252
ENSG00000147202	DIAPH2	Protein_Coding	Down-regulated	-2.41305	0.00535252
ENSG00000140090	SLC24A4	Protein_Coding	Up-regulated	6.69633	0.00535384
ENSG00000092964	DPYSL2	Protein_Coding	Down-regulated	-2.11639	0.00540392
ENSG00000139044	B4GALNT3	Protein_Coding	Up-regulated	4.76364	0.0054514
ENSG00000182103	FAM181B	Protein_Coding	Up-regulated	7.12609	0.0054514
ENSG00000225362	CT62	lncRNA	Up-regulated	5.96092	0.0054514
ENSG00000240350	SOCAR	lncRNA	Up-regulated	5.16934	0.0054514
ENSG00000230615	ENSG00000230615	lncRNA	Up-regulated	3.29349	0.00546113
ENSG00000196747	H2AC13	Protein_Coding	Up-regulated	4.20552	0.0054848
ENSG00000189056	RELN	Protein_Coding	Up-regulated	6.24331	0.00550257
ENSG00000246705	H2AJ	Protein_Coding	Up-regulated	1.87474	0.00550257
ENSG00000111837	MAK	Protein_Coding	Up-regulated	6.63432	0.00550686
ENSG00000288765	ENSG00000288765	lncRNA	Up-regulated	8.11072	0.00551692
ENSG00000174325	DIRC1	lncRNA	Up-regulated	5.73449	0.00552785
ENSG00000113070	HBEGF	Protein_Coding	Up-regulated	2.42257	0.00553066
ENSG00000160145	KALRN	Protein_Coding	Up-regulated	4.48363	0.00556186
ENSG00000175793	SFN	Protein_Coding	Up-regulated	4.95987	0.00556186
ENSG00000261730	FOXF2-DT	lncRNA	Up-regulated	6.64161	0.00556186
ENSG00000286050	ENSG00000286050	lncRNA	Up-regulated	5.50559	0.00556186
ENSG00000286655	ENSG00000286655	lncRNA	Up-regulated	6.68563	0.00556186
ENSG00000289438	ENSG00000289438	lncRNA	Up-regulated	5.26911	0.00556186
ENSG00000095203	EPB41L4B	Protein_Coding	Up-regulated	3.3666	0.00556827
ENSG00000106536	POU6F2	Protein_Coding	Up-regulated	6.58102	0.00556827
ENSG00000125845	BMP2	Protein_Coding	Up-regulated	2.7007	0.00556827
ENSG00000133392	MYH11	Protein_Coding	Up-regulated	4.91955	0.00556827
ENSG00000152034	MCHR2	Protein_Coding	Up-regulated	6.58102	0.00556827
ENSG00000203685	STUM	Protein_Coding	Up-regulated	6.94769	0.00556827
ENSG00000179588	ZFPM1	Protein_Coding	Up-regulated	2.44018	0.00556913
ENSG00000266265	KLF14	Protein_Coding	Up-regulated	7.49302	0.00560391
ENSG00000173227	SYT12	Protein_Coding	Up-regulated	3.6325	0.00563638
ENSG00000268460	ENSG00000268460	lncRNA	Up-regulated	6.80347	0.00565066
ENSG00000286885	ENSG00000286885	lncRNA	Up-regulated	6.57916	0.00569684
ENSG00000162975	KCNF1	Protein_Coding	Up-regulated	7.04724	0.00571373
ENSG00000070182	SPTB	Protein_Coding	Up-regulated	5.49026	0.00572349
ENSG00000048392	RRM2B	Protein_Coding	Up-regulated	2.25343	0.00574958
ENSG00000232098	ZNF584-DT	lncRNA	Up-regulated	2.41553	0.00574958
ENSG00000230943	LINC02541	lncRNA	Up-regulated	6.15394	0.00585279
ENSG00000253973	NRIP3-DT	lncRNA	Up-regulated	6.58475	0.00589214
ENSG00000286672	ENSG00000286672	lncRNA	Up-regulated	6.58475	0.0058936
ENSG00000101076	HNF4A	Protein_Coding	Up-regulated	6.90177	0.00589634
ENSG00000197084	LCE1C	Protein_Coding	Up-regulated	7.2734	0.00589634
ENSG00000162894	FCMR	Protein_Coding	Up-regulated	5.10648	0.00590175
ENSG00000164398	ACSL6	Protein_Coding	Up-regulated	7.07896	0.00594952
ENSG00000169783	LINGO1	Protein_Coding	Up-regulated	4.80995	0.00596046
ENSG00000102445	RUBCNL	Protein_Coding	Up-regulated	7.43296	0.00596177
ENSG00000124067	SLC12A4	Protein_Coding	Up-regulated	2.27048	0.00596177
ENSG00000036828	CASR	Protein_Coding	Up-regulated	6.64347	0.00597897
ENSG00000128815	WDFY4	Protein_Coding	Up-regulated	6.64347	0.00597897
ENSG00000124721	DNAH8	Protein_Coding	Up-regulated	4.67922	0.00603533
ENSG00000182261	NLRP10	Protein_Coding	Up-regulated	3.86941	0.0060451
ENSG00000204928	GRXCR2	Protein_Coding	Up-regulated	6.52368	0.0060451
ENSG00000026103	FAS	Protein_Coding	Up-regulated	1.87692	0.00609552
ENSG00000089169	RPH3A	Protein_Coding	Up-regulated	6.85432	0.00609552
ENSG00000118898	PPL	Protein_Coding	Down-regulated	-2.87775	0.00609552
ENSG00000165272	AQP3	Protein_Coding	Up-regulated	4.23923	0.00609552
ENSG00000187608	ISG15	Protein_Coding	Up-regulated	2.14533	0.00609552
ENSG00000227906	SNAP25-AS1	lncRNA	Up-regulated	6.52177	0.00609552
ENSG00000228035	NGF-AS1	lncRNA	Up-regulated	6.52177	0.00609552
ENSG00000238273	ENSG00000238273	lncRNA	Up-regulated	7.63375	0.00609552
ENSG00000205978	NYNRIN	Protein_Coding	Up-regulated	3.00434	0.00610502
ENSG00000226609	SNX30-DT	lncRNA	Up-regulated	7.16241	0.0061079
ENSG00000183153	GJD3	Protein_Coding	Up-regulated	3.88943	0.00612733
ENSG00000182541	LIMK2	Protein_Coding	Up-regulated	2.48375	0.00613294
ENSG00000006468	ETV1	Protein_Coding	Down-regulated	-2.49843	0.00629876
ENSG00000167080	B4GALNT2	Protein_Coding	Up-regulated	5.33345	0.00636882
ENSG00000228384	ENSG00000228384	lncRNA	Up-regulated	7.33683	0.00645161
ENSG00000259211	ENSG00000259211	lncRNA	Up-regulated	6.63058	0.00645161
ENSG00000111424	VDR	Protein_Coding	Up-regulated	2.64449	0.00645492
ENSG00000163217	BMP10	Protein_Coding	Up-regulated	6.80528	0.00645492
ENSG00000167772	ANGPTL4	Protein_Coding	Down-regulated	-2.18602	0.00645492
ENSG00000287475	ENSG00000287475	lncRNA	Up-regulated	6.73323	0.00645492
ENSG00000155629	PIK3AP1	Protein_Coding	Up-regulated	5.19059	0.00653874
ENSG00000182050	MGAT4C	Protein_Coding	Up-regulated	6.52752	0.00656682
ENSG00000006747	SCIN	Protein_Coding	Up-regulated	4.9132	0.00659035
ENSG00000042781	USH2A	Protein_Coding	Up-regulated	5.21944	0.00659035
ENSG00000233436	BTBD18	Protein_Coding	Up-regulated	6.64538	0.00667899
ENSG00000175262	C1orf127	Protein_Coding	Up-regulated	6.46393	0.00673341
ENSG00000240386	LCE1F	Protein_Coding	Up-regulated	7.88576	0.00697536
ENSG00000285684	ENSG00000285684	lncRNA	Up-regulated	5.19452	0.00703483
ENSG00000134757	DSG3	Protein_Coding	Up-regulated	7.3105	0.00703867
ENSG00000144460	NYAP2	Protein_Coding	Up-regulated	5.22049	0.00703867
ENSG00000105270	CLIP3	Protein_Coding	Down-regulated	-2.47585	0.00705924
ENSG00000149485	FADS1	Protein_Coding	Up-regulated	2.06738	0.00705924
ENSG00000090776	EFNB1	Protein_Coding	Up-regulated	2.27891	0.00709945
ENSG00000112246	SIM1	Protein_Coding	Up-regulated	6.4659	0.00709945
ENSG00000198743	SLC5A3	Protein_Coding	Up-regulated	2.29883	0.00709945
ENSG00000228061	ENSG00000228061	lncRNA	Up-regulated	6.51788	0.00709945
ENSG00000246640	PICART1	lncRNA	Up-regulated	3.28401	0.00709945
ENSG00000152578	GRIA4	Protein_Coding	Up-regulated	6.4659	0.00710348
ENSG00000143627	PKLR	Protein_Coding	Up-regulated	5.55519	0.00713682
ENSG00000115594	IL1R1	Protein_Coding	Down-regulated	-2.68308	0.00719832
ENSG00000146809	ASB15	Protein_Coding	Up-regulated	6.85613	0.00719832
ENSG00000287643	ENSG00000287643	lncRNA	Up-regulated	6.85613	0.00719832
ENSG00000270882	H4C14	Protein_Coding	Up-regulated	4.38832	0.00720253
ENSG00000285771	ENSG00000285771	lncRNA	Up-regulated	7.50883	0.00728247
ENSG00000258479	LINC00640	lncRNA	Up-regulated	6.5295	0.0072838
ENSG00000111077	TNS2	Protein_Coding	Down-regulated	-1.82093	0.00729065
ENSG00000123843	C4BPB	Protein_Coding	Up-regulated	7.83773	0.00732824
ENSG00000139438	FAM222A	Protein_Coding	Up-regulated	3.82097	0.00733216
ENSG00000004809	SLC22A16	Protein_Coding	Up-regulated	6.70193	0.00733333
ENSG00000066294	CD84	Protein_Coding	Up-regulated	6.99558	0.00733333
ENSG00000078549	ADCYAP1R1	Protein_Coding	Up-regulated	6.62864	0.00733333
ENSG00000140284	SLC27A2	Protein_Coding	Up-regulated	6.70193	0.00733333
ENSG00000285873	ENSG00000285873	lncRNA	Up-regulated	6.99558	0.00733333
ENSG00000111432	FZD10	Protein_Coding	Up-regulated	7.16085	0.00745024
ENSG00000117308	GALE	Protein_Coding	Up-regulated	2.01157	0.00755571
ENSG00000134962	KLB	Protein_Coding	Up-regulated	5.13619	0.00755571
ENSG00000048471	SNX29	Protein_Coding	Down-regulated	-2.1285	0.0075624
ENSG00000095585	BLNK	Protein_Coding	Up-regulated	5.13332	0.0075624
ENSG00000135638	EMX1	Protein_Coding	Up-regulated	5.09129	0.0075624
ENSG00000143851	PTPN7	Protein_Coding	Up-regulated	6.80714	0.0075624
ENSG00000166897	ELFN2	Protein_Coding	Up-regulated	2.78802	0.0075624
ENSG00000185518	SV2B	Protein_Coding	Up-regulated	5.31343	0.0075624
ENSG00000251381	LINC00958	lncRNA	Up-regulated	6.64733	0.0075624
ENSG00000268108	ENSG00000268108	lncRNA	Up-regulated	6.64733	0.0075624
ENSG00000114248	LRRC31	Protein_Coding	Up-regulated	6.64733	0.00757078
ENSG00000173391	OLR1	Protein_Coding	Up-regulated	5.42621	0.00758538
ENSG00000276564	ENSG00000276564	lncRNA	Up-regulated	5.10154	0.00760464
ENSG00000180613	GSX2	Protein_Coding	Up-regulated	6.39956	0.00763887
ENSG00000235513	L3MBTL2-AS1	lncRNA	Up-regulated	3.79508	0.00763887
ENSG00000258413	FBXO34-AS1	lncRNA	Up-regulated	4.96287	0.00763887
ENSG00000179046	TRIML2	Protein_Coding	Up-regulated	5.14839	0.00765372
ENSG00000183625	CCR3	Protein_Coding	Up-regulated	6.46793	0.00765372
ENSG00000169252	ADRB2	Protein_Coding	Up-regulated	3.07502	0.0076594
ENSG00000259424	IRAIN	lncRNA	Up-regulated	4.2092	0.0076594
ENSG00000128422	KRT17	Protein_Coding	Up-regulated	4.24053	0.00769633
ENSG00000170477	KRT4	Protein_Coding	Up-regulated	6.39754	0.00773827
ENSG00000145349	CAMK2D	Protein_Coding	Down-regulated	-1.78225	0.00782823
ENSG00000198729	PPP1R14C	Protein_Coding	Up-regulated	3.15089	0.00782823
ENSG00000089250	NOS1	Protein_Coding	Up-regulated	6.75642	0.00783084
ENSG00000250423	KIAA1210	Protein_Coding	Up-regulated	6.59059	0.00786133
ENSG00000231210	COMETT	lncRNA	Up-regulated	5.204	0.007883
ENSG00000289156	ENSG00000289156	lncRNA	Up-regulated	7.33541	0.00789625
ENSG00000261787	TCF24	Protein_Coding	Up-regulated	7.08396	0.00792481
ENSG00000068078	FGFR3	Protein_Coding	Up-regulated	3.10927	0.00796525
ENSG00000110492	MDK	Protein_Coding	Up-regulated	3.0462	0.0080349
ENSG00000181092	ADIPOQ	Protein_Coding	Up-regulated	6.53154	0.0081542
ENSG00000234956	LINC02539	lncRNA	Up-regulated	7.04393	0.0081542
ENSG00000146232	NFKBIE	Protein_Coding	Up-regulated	2.64228	0.00818289
ENSG00000250497	ENSG00000250497	lncRNA	Up-regulated	6.67992	0.00821062
ENSG00000113318	MSH3	Protein_Coding	Down-regulated	-2.2294	0.00821243
ENSG00000204604	ZNF468	Protein_Coding	Up-regulated	2.19779	0.00824654
ENSG00000197153	H3C12	Protein_Coding	Up-regulated	5.07728	0.00826386
ENSG00000176302	FOXR1	Protein_Coding	Up-regulated	6.82702	0.00828372
ENSG00000172818	OVOL1	Protein_Coding	Up-regulated	6.82702	0.0082839
ENSG00000162630	B3GALT2	Protein_Coding	Up-regulated	5.1067	0.00833321
ENSG00000100139	MICALL1	Protein_Coding	Up-regulated	2.02345	0.00834884
ENSG00000116329	OPRD1	Protein_Coding	Up-regulated	4.80283	0.00839995
ENSG00000134259	NGF	Protein_Coding	Up-regulated	3.78997	0.00839995
ENSG00000184144	CNTN2	Protein_Coding	Up-regulated	6.85797	0.00839995
ENSG00000189431	RASSF10	Protein_Coding	Up-regulated	4.74246	0.00851953
ENSG00000283674	ENSG00000283674	lncRNA	Up-regulated	6.40365	0.0085226
ENSG00000181649	PHLDA2	Protein_Coding	Up-regulated	2.85014	0.00858858
ENSG00000120251	GRIA2	Protein_Coding	Up-regulated	6.33428	0.00859597
ENSG00000170289	CNGB3	Protein_Coding	Up-regulated	6.33428	0.00859597
ENSG00000223382	LINC01778	lncRNA	Up-regulated	4.2102	0.00861624
ENSG00000179023	KLHDC7A	Protein_Coding	Up-regulated	7.91019	0.00865443
ENSG00000203446	SUGCT-AS1	lncRNA	Up-regulated	6.47001	0.00865443
ENSG00000260193	LINC02846	lncRNA	Up-regulated	4.45095	0.00871115
ENSG00000070601	FRMPD1	Protein_Coding	Up-regulated	6.64933	0.00878489
ENSG00000091138	SLC26A3	Protein_Coding	Up-regulated	6.64933	0.00878489
ENSG00000149295	DRD2	Protein_Coding	Up-regulated	6.99732	0.00878489
ENSG00000164746	C7orf57	Protein_Coding	Up-regulated	5.10473	0.00878489
ENSG00000174527	MYO1H	Protein_Coding	Up-regulated	6.64933	0.00878489
ENSG00000198300	PEG3	Protein_Coding	Up-regulated	4.36927	0.00878489
ENSG00000278677	H2AC17	Protein_Coding	Up-regulated	5.4799	0.00878489
ENSG00000289589	ENSG00000289589	lncRNA	Up-regulated	5.79755	0.00882643
ENSG00000165194	PCDH19	Protein_Coding	Up-regulated	4.49632	0.00887558
ENSG00000140749	IGSF6	Protein_Coding	Up-regulated	6.33012	0.00890478
ENSG00000253628	ENSG00000253628	lncRNA	Up-regulated	5.16202	0.00890478
ENSG00000100678	SLC8A3	Protein_Coding	Up-regulated	4.0035	0.00894438
ENSG00000272334	ENSG00000272334	lncRNA	Up-regulated	6.39339	0.00902605
ENSG00000257702	LBX2-AS1	lncRNA	Up-regulated	3.35984	0.00903798
ENSG00000027644	INSRR	Protein_Coding	Up-regulated	6.33639	0.0090406
ENSG00000225830	ERCC6	Protein_Coding	Down-regulated	-1.78618	0.0090406
ENSG00000185669	SNAI3	Protein_Coding	Up-regulated	4.71543	0.00913738
ENSG00000257859	CASC18	lncRNA	Up-regulated	4.94035	0.00920108
ENSG00000127955	GNAI1	Protein_Coding	Up-regulated	1.76347	0.00922692
ENSG00000166501	PRKCB	Protein_Coding	Up-regulated	6.59265	0.00922692
ENSG00000231426	FILNC1	lncRNA	Up-regulated	6.59266	0.00922692
ENSG00000179546	HTR1D	Protein_Coding	Up-regulated	4.45401	0.00924994
ENSG00000049130	KITLG	Protein_Coding	Up-regulated	1.77391	0.00929983
ENSG00000144290	SLC4A10	Protein_Coding	Up-regulated	6.75836	0.00929983
ENSG00000178718	RPP25	Protein_Coding	Up-regulated	3.44993	0.00929983
ENSG00000229848	ENSG00000229848	lncRNA	Up-regulated	5.74899	0.00932743
ENSG00000122507	BBS9	Protein_Coding	Down-regulated	-2.44441	0.00933131
ENSG00000125538	IL1B	Protein_Coding	Up-regulated	3.22786	0.00933131
ENSG00000164611	PTTG1	Protein_Coding	Up-regulated	1.94824	0.00933131
ENSG00000255100	TSKU-AS1	lncRNA	Up-regulated	4.47949	0.00933131
ENSG00000057657	PRDM1	Protein_Coding	Up-regulated	3.44278	0.00939095
ENSG00000273125	LINC01990	lncRNA	Up-regulated	6.40578	0.00939095
ENSG00000145794	MEGF10	Protein_Coding	Up-regulated	4.68421	0.00940131
ENSG00000274641	H2BC17	Protein_Coding	Up-regulated	4.62097	0.00941884
ENSG00000056736	IL17RB	Protein_Coding	Up-regulated	4.66427	0.00949068
ENSG00000110427	KIAA1549L	Protein_Coding	Down-regulated	-1.87254	0.00949068
ENSG00000178821	TMEM52	Protein_Coding	Up-regulated	4.26212	0.00966974
ENSG00000125804	FAM182A	lncRNA	Up-regulated	6.67791	0.00967443
ENSG00000184613	NELL2	Protein_Coding	Up-regulated	5.02795	0.00971946
ENSG00000148400	NOTCH1	Protein_Coding	Up-regulated	1.8433	0.0097415
ENSG00000267551	GNA15-DT	lncRNA	Up-regulated	4.31031	0.00977862
ENSG00000166391	MOGAT2	Protein_Coding	Up-regulated	6.26374	0.00980594
ENSG00000179008	C14orf39	Protein_Coding	Up-regulated	6.26374	0.00980594
ENSG00000127528	KLF2	Protein_Coding	Down-regulated	-2.40283	0.00980625
ENSG00000112041	TULP1	Protein_Coding	Up-regulated	6.45379	0.00981978
ENSG00000143858	SYT2	Protein_Coding	Up-regulated	5.13779	0.00981978
ENSG00000283849	ENSG00000283849	lncRNA	Up-regulated	4.98764	0.00981978
ENSG00000121068	TBX2	Protein_Coding	Up-regulated	2.65407	0.0098254
ENSG00000126733	DACH2	Protein_Coding	Up-regulated	5.25776	0.0098254
ENSG00000148942	SLC5A12	Protein_Coding	Up-regulated	6.33856	0.0098559
ENSG00000152932	RAB3C	Protein_Coding	Up-regulated	6.33855	0.0098559
ENSG00000169876	MUC17	Protein_Coding	Up-regulated	6.33856	0.0098559
ENSG00000170836	PPM1D	Protein_Coding	Up-regulated	1.92775	0.0098559
ENSG00000177565	TBL1XR1	Protein_Coding	Down-regulated	-1.81395	0.0098559
ENSG00000185198	PRSS57	Protein_Coding	Up-regulated	6.33856	0.0098559
ENSG00000188959	C9orf152	Protein_Coding	Up-regulated	6.2616	0.0098559
ENSG00000198358	ENSG00000198358	lncRNA	Up-regulated	6.2616	0.0098559
ENSG00000248371	LINC02056	lncRNA	Up-regulated	5.06777	0.0098559
ENSG00000139800	ZIC5	Protein_Coding	Up-regulated	6.62459	0.00987627
ENSG00000164900	GBX1	Protein_Coding	Up-regulated	6.62459	0.00987627
ENSG00000288009	ENSG00000288009	lncRNA	Up-regulated	6.26589	0.00993825
ENSG00000147434	CHRNA6	Protein_Coding	Up-regulated	6.2659	0.00996759
ENSG00000273013	ENSG00000273013	lncRNA	Up-regulated	4.92884	0.00996759
ENSG00000290829	ENSG00000290829	lncRNA	Up-regulated	6.2659	0.00996759
ENSG00000179148	ALOXE3	Protein_Coding	Up-regulated	3.81937	0.00996838
ENSG00000176040	TMPRSS7	Protein_Coding	Up-regulated	4.64026	0.010007
ENSG00000165731	RET	Protein_Coding	Up-regulated	4.63368	0.0100185
ENSG00000188064	WNT7B	Protein_Coding	Up-regulated	5.33501	0.0100185
ENSG00000196337	CGB7	Protein_Coding	Up-regulated	4.71773	0.0100185
ENSG00000276850	ENSG00000276850	lncRNA	Up-regulated	4.60836	0.0100185
ENSG00000133116	KL	Protein_Coding	Up-regulated	4.87049	0.0100458
ENSG00000245648	KLRK1-AS1	lncRNA	Up-regulated	4.69819	0.0100886
ENSG00000133477	FAM83F	Protein_Coding	Up-regulated	6.39121	0.0101268
ENSG00000251635	LINC02278	lncRNA	Up-regulated	7.0421	0.0101268
ENSG00000285831	ENSG00000285831	lncRNA	Up-regulated	4.66735	0.0101341
ENSG00000090382	LYZ	Protein_Coding	Up-regulated	4.90506	0.0101593
ENSG00000080546	SESN1	Protein_Coding	Up-regulated	1.79427	0.0101945
ENSG00000259370	ENSG00000259370	lncRNA	Up-regulated	5.25502	0.0101945
ENSG00000188559	RALGAPA2	Protein_Coding	Down-regulated	-2.66191	0.0102303
ENSG00000113196	HAND1	Protein_Coding	Up-regulated	4.48808	0.0102475
ENSG00000120149	MSX2	Protein_Coding	Up-regulated	3.99664	0.0102475
ENSG00000251301	LINC02384	lncRNA	Up-regulated	5.19814	0.0102475
ENSG00000178922	HYI	Protein_Coding	Up-regulated	2.23509	0.0102735
ENSG00000213626	LBH	Protein_Coding	Up-regulated	2.66016	0.0102735
ENSG00000119283	TRIM67	Protein_Coding	Up-regulated	5.11708	0.0102889
ENSG00000075407	ZNF37A	Protein_Coding	Up-regulated	1.73363	0.0104343
ENSG00000082074	FYB1	Protein_Coding	Up-regulated	4.28477	0.010442
ENSG00000143479	DYRK3	Protein_Coding	Up-regulated	2.04181	0.010442
ENSG00000166016	ABTB2	Protein_Coding	Up-regulated	1.86889	0.010442
ENSG00000227484	ENSG00000227484	lncRNA	Up-regulated	6.51162	0.010442
ENSG00000126803	HSPA2	Protein_Coding	Up-regulated	3.25363	0.010493
ENSG00000234377	OBI1-AS1	lncRNA	Up-regulated	4.86268	0.010493
ENSG00000040731	CDH10	Protein_Coding	Up-regulated	3.27747	0.0105178
ENSG00000004848	ARX	Protein_Coding	Up-regulated	6.72736	0.0105374
ENSG00000151475	SLC25A31	Protein_Coding	Up-regulated	6.40799	0.0105374
ENSG00000250548	LINC01303	lncRNA	Up-regulated	3.44382	0.0105374
ENSG00000272079	ENSG00000272079	lncRNA	Up-regulated	4.21683	0.0105374
ENSG00000277399	GPR179	Protein_Coding	Up-regulated	4.18597	0.0105374
ENSG00000141068	KSR1	Protein_Coding	Up-regulated	1.99234	0.0105581
ENSG00000147573	TRIM55	Protein_Coding	Up-regulated	4.18889	0.0105581
ENSG00000184374	COLEC10	Protein_Coding	Up-regulated	6.59477	0.0105581
ENSG00000286695	ENSG00000286695	lncRNA	Up-regulated	4.20897	0.0105639
ENSG00000100867	DHRS2	Protein_Coding	Up-regulated	4.8249	0.0105867
ENSG00000272457	ENSG00000272457	lncRNA	Up-regulated	4.58681	0.0105867
ENSG00000134258	VTCN1	Protein_Coding	Up-regulated	6.32576	0.0106251
ENSG00000291038	ENSG00000291038	lncRNA	Up-regulated	6.32576	0.0106251
ENSG00000152782	PANK1	Protein_Coding	Up-regulated	2.28544	0.0106284
ENSG00000157087	ATP2B2	Protein_Coding	Up-regulated	4.79434	0.0106284
ENSG00000169550	MUC15	Protein_Coding	Up-regulated	6.26811	0.0106284
ENSG00000176601	MAP3K19	Protein_Coding	Up-regulated	6.26811	0.0106284
ENSG00000223770	CACNA2D1-AS1	lncRNA	Up-regulated	6.26811	0.0106284
ENSG00000233672	RNASEH2B-AS1	lncRNA	Up-regulated	4.79434	0.0106284
ENSG00000167196	FBXO22	Protein_Coding	Up-regulated	1.75936	0.0106929
ENSG00000246877	DNM1P35	lncRNA	Up-regulated	4.1982	0.0106929
ENSG00000196990	FAM163B	Protein_Coding	Up-regulated	6.53582	0.0107418
ENSG00000249375	CASC11	lncRNA	Up-regulated	4.71993	0.0107418
ENSG00000176912	TYMSOS	lncRNA	Up-regulated	3.71553	0.0108976
ENSG00000233977	ENSG00000233977	lncRNA	Up-regulated	4.7931	0.0109112
ENSG00000167799	NUDT8	Protein_Coding	Up-regulated	3.32136	0.0109213
ENSG00000009709	PAX7	Protein_Coding	Up-regulated	6.18962	0.0109819
ENSG00000043355	ZIC2	Protein_Coding	Up-regulated	4.61516	0.0110318
ENSG00000116748	AMPD1	Protein_Coding	Up-regulated	6.34081	0.0110318
ENSG00000163145	C1QTNF7	Protein_Coding	Up-regulated	6.19183	0.0110318
ENSG00000164237	CMBL	Protein_Coding	Up-regulated	1.79736	0.0110318
ENSG00000169064	ZBBX	Protein_Coding	Up-regulated	6.34081	0.0110318
ENSG00000183570	PCBP3	Protein_Coding	Down-regulated	-2.60045	0.0110318
ENSG00000250286	ENSG00000250286	lncRNA	Up-regulated	5.19923	0.0110318
ENSG00000250734	ENSG00000250734	lncRNA	Up-regulated	6.19183	0.0110318
ENSG00000257696	UHRF1BP1L-DT	lncRNA	Up-regulated	4.82428	0.0110318
ENSG00000103528	SYT17	Protein_Coding	Up-regulated	5.04567	0.0110371
ENSG00000170684	ZNF296	Protein_Coding	Up-regulated	3.88316	0.0111573
ENSG00000286887	ENSG00000286887	lncRNA	Up-regulated	6.67585	0.0112256
ENSG00000198324	PHETA1	Protein_Coding	Up-regulated	2.38942	0.0112328
ENSG00000268066	FMR1-AS1	lncRNA	Up-regulated	6.67585	0.0112328
ENSG00000259178	ENSG00000259178	lncRNA	Up-regulated	4.78748	0.0112383
ENSG00000111783	RFX4	Protein_Coding	Up-regulated	6.70792	0.0113581
ENSG00000187193	MT1X	Protein_Coding	Down-regulated	-2.37654	0.0113581
ENSG00000128872	TMOD2	Protein_Coding	Down-regulated	-2.15664	0.0113598
ENSG00000185818	NAT8L	Protein_Coding	Up-regulated	3.48731	0.0113923
ENSG00000206579	XKR4	Protein_Coding	Up-regulated	6.18739	0.011401
ENSG00000172421	EFCAB3	Protein_Coding	Up-regulated	6.18739	0.0114663
ENSG00000229081	LINC01165	lncRNA	Up-regulated	6.18739	0.0114663
ENSG00000271984	ENSG00000271984	lncRNA	Up-regulated	4.60339	0.0115424
ENSG00000174705	SH3PXD2B	Protein_Coding	Down-regulated	-1.87307	0.0116539
ENSG00000289559	ENSG00000289559	lncRNA	Up-regulated	4.87702	0.0116539
ENSG00000175183	CSRP2	Protein_Coding	Up-regulated	2.87511	0.0117182
ENSG00000055732	MCOLN3	Protein_Coding	Up-regulated	4.51884	0.0117823
ENSG00000289291	ENSG00000289291	lncRNA	Up-regulated	4.66881	0.0118477
ENSG00000196090	PTPRT	Protein_Coding	Up-regulated	6.19409	0.0118487
ENSG00000289885	ENSG00000289885	lncRNA	Up-regulated	4.91894	0.011895
ENSG00000186115	CYP4F2	Protein_Coding	Up-regulated	6.86177	0.0119808
ENSG00000163395	IGFN1	Protein_Coding	Up-regulated	6.86177	0.0119861
ENSG00000159212	CLIC6	Protein_Coding	Up-regulated	4.75823	0.0120261
ENSG00000104413	ESRP1	Protein_Coding	Up-regulated	6.27041	0.0120754
ENSG00000169508	GPR183	Protein_Coding	Up-regulated	6.27041	0.0120781
ENSG00000233276	GPX1	Protein_Coding	Up-regulated	1.89427	0.012148
ENSG00000135374	ELF5	Protein_Coding	Up-regulated	6.41028	0.0123405
ENSG00000173585	CCR9	Protein_Coding	Up-regulated	6.41028	0.0123405
ENSG00000179058	C9orf50	Protein_Coding	Up-regulated	4.98945	0.0123405
ENSG00000218018	RBM38-AS1	lncRNA	Up-regulated	4.75007	0.0123405
ENSG00000254038	ENSG00000254038	lncRNA	Up-regulated	6.41028	0.0123405
ENSG00000163273	NPPC	Protein_Coding	Up-regulated	4.13774	0.0124782
ENSG00000100311	PDGFB	Protein_Coding	Up-regulated	4.24202	0.0125524
ENSG00000106952	TNFSF8	Protein_Coding	Up-regulated	6.18508	0.0128762
ENSG00000117598	PLPPR5	Protein_Coding	Up-regulated	4.85592	0.0128762
ENSG00000165816	VWA2	Protein_Coding	Up-regulated	6.59695	0.0128762
ENSG00000259341	ENSG00000259341	lncRNA	Up-regulated	6.59695	0.0128762
ENSG00000285955	ENSG00000285955	lncRNA	Up-regulated	4.24847	0.0128762
ENSG00000288611	NPBWR1	Protein_Coding	Up-regulated	6.18508	0.0128762
ENSG00000133980	VRTN	Protein_Coding	Up-regulated	4.71547	0.012884
ENSG00000146453	PNLDC1	Protein_Coding	Up-regulated	4.7513	0.0129057
ENSG00000154025	SLC5A10	Protein_Coding	Up-regulated	4.19156	0.0131021
ENSG00000284730	TMDD1	Protein_Coding	Up-regulated	6.7253	0.0131427
ENSG00000286766	ENSG00000286766	lncRNA	Up-regulated	6.34317	0.0131609
ENSG00000287969	ENSG00000287969	lncRNA	Up-regulated	6.34317	0.0131609
ENSG00000140287	HDC	Protein_Coding	Up-regulated	6.11381	0.0131704
ENSG00000160870	CYP3A7	Protein_Coding	Up-regulated	6.11381	0.0131704
ENSG00000226792	C13orf42	Protein_Coding	Up-regulated	6.11381	0.0131704
ENSG00000255931	ENSG00000255931	lncRNA	Up-regulated	6.11381	0.0131704
ENSG00000286330	ENSG00000286330	lncRNA	Up-regulated	6.11381	0.0131704
ENSG00000166634	SERPINB12	Protein_Coding	Up-regulated	6.11381	0.0131728
ENSG00000278505	C17orf78	Protein_Coding	Up-regulated	6.11381	0.0131728
ENSG00000147251	DOCK11	Protein_Coding	Down-regulated	-2.09164	0.0132211
ENSG00000105137	SYDE1	Protein_Coding	Down-regulated	-2.20493	0.0133141
ENSG00000066336	SPI1	Protein_Coding	Up-regulated	4.82014	0.0133472
ENSG00000077935	SMC1B	Protein_Coding	Up-regulated	6.19643	0.0133472
ENSG00000186510	CLCNKA	Protein_Coding	Up-regulated	6.19643	0.0133472
ENSG00000268287	ENSG00000268287	lncRNA	Up-regulated	6.19643	0.0133472
ENSG00000090013	BLVRB	Protein_Coding	Up-regulated	1.83273	0.0133817
ENSG00000070808	CAMK2A	Protein_Coding	Up-regulated	6.11151	0.0134584
ENSG00000146006	LRRTM2	Protein_Coding	Up-regulated	4.17855	0.0135596
ENSG00000227431	CSE1L-DT	lncRNA	Up-regulated	4.78346	0.0136169
ENSG00000115956	PLEK	Protein_Coding	Up-regulated	4.48432	0.0137675
ENSG00000185630	PBX1	Protein_Coding	Down-regulated	-1.93839	0.0137675
ENSG00000287189	ENSG00000287189	lncRNA	Up-regulated	6.11612	0.0137972
ENSG00000117245	KIF17	Protein_Coding	Up-regulated	3.95591	0.013803
ENSG00000131620	ANO1	Protein_Coding	Up-regulated	6.11612	0.013803
ENSG00000143340	FAM163A	Protein_Coding	Up-regulated	6.25476	0.013803
ENSG00000149488	TMC2	Protein_Coding	Up-regulated	6.47671	0.013803
ENSG00000205488	CALML3-AS1	lncRNA	Up-regulated	6.11612	0.013803
ENSG00000231346	LINC01160	lncRNA	Up-regulated	4.18711	0.013803
ENSG00000234546	LNCTAM34A	lncRNA	Up-regulated	3.10817	0.013803
ENSG00000188322	SBK1	Protein_Coding	Up-regulated	4.33254	0.0138588
ENSG00000175567	UCP2	Protein_Coding	Up-regulated	3.8245	0.0139028
ENSG00000152061	RABGAP1L	Protein_Coding	Down-regulated	-2.18395	0.0139302
ENSG00000133124	IRS4	Protein_Coding	Up-regulated	4.30193	0.0139575
ENSG00000084453	SLCO1A2	Protein_Coding	Up-regulated	6.27282	0.0141144
ENSG00000152670	DDX4	Protein_Coding	Up-regulated	6.27282	0.0141144
ENSG00000173093	CCDC63	Protein_Coding	Up-regulated	6.71002	0.0141144
ENSG00000227253	ENSG00000227253	lncRNA	Up-regulated	6.27282	0.0141144
ENSG00000253824	ENSG00000253824	lncRNA	Up-regulated	6.27282	0.0141144
ENSG00000163833	FBXO40	Protein_Coding	Up-regulated	6.27282	0.0141479
ENSG00000162881	OXER1	Protein_Coding	Up-regulated	6.27282	0.014182
ENSG00000141905	NFIC	Protein_Coding	Down-regulated	-2.0251	0.0142225
ENSG00000150760	DOCK1	Protein_Coding	Down-regulated	-1.72806	0.0142225
ENSG00000178015	GPR150	Protein_Coding	Up-regulated	4.18591	0.0142225
ENSG00000251002	TRD-AS1	lncRNA	Up-regulated	4.67178	0.0142439
ENSG00000176387	HSD11B2	Protein_Coding	Up-regulated	4.63543	0.014263
ENSG00000286010	ENSG00000286010	lncRNA	Up-regulated	4.36465	0.0143059
ENSG00000172794	RAB37	Protein_Coding	Up-regulated	3.83763	0.0143077
ENSG00000146707	POMZP3	Protein_Coding	Up-regulated	2.57546	0.0143241
ENSG00000162373	BEND5	Protein_Coding	Down-regulated	-4.57532	0.0144122
ENSG00000168505	GBX2	Protein_Coding	Up-regulated	4.4779	0.0144288
ENSG00000285966	ENSG00000285966	lncRNA	Up-regulated	6.62028	0.0144706
ENSG00000158859	ADAMTS4	Protein_Coding	Up-regulated	3.67419	0.0144868
ENSG00000221878	PSG7	Protein_Coding	Up-regulated	5.41226	0.014533
ENSG00000273079	GRIN2B	Protein_Coding	Up-regulated	6.10916	0.014533
ENSG00000285649	ENSG00000285649	lncRNA	Up-regulated	4.81872	0.014533
ENSG00000169507	SLC38A11	Protein_Coding	Up-regulated	4.87862	0.0145561
ENSG00000259727	ENSG00000259727	lncRNA	Up-regulated	4.55636	0.0145759
ENSG00000053108	FSTL4	Protein_Coding	Up-regulated	4.63501	0.0145867
ENSG00000005483	KMT2E	Protein_Coding	Down-regulated	-1.79219	0.0146212
ENSG00000275880	ENSG00000275880	lncRNA	Up-regulated	3.13461	0.0146212
ENSG00000260588	ENSG00000260588	lncRNA	Up-regulated	4.34869	0.0147456
ENSG00000180336	MEIOC	Protein_Coding	Up-regulated	4.15728	0.014779
ENSG00000104140	RHOV	Protein_Coding	Up-regulated	4.10473	0.0147947
ENSG00000176531	PHLDB3	Protein_Coding	Up-regulated	2.26066	0.0148088
ENSG00000077943	ITGA8	Protein_Coding	Up-regulated	6.18265	0.0148473
ENSG00000145451	GLRA3	Protein_Coding	Up-regulated	6.41267	0.0148721
ENSG00000196839	ADA	Protein_Coding	Up-regulated	2.14911	0.014926
ENSG00000080224	EPHA6	Protein_Coding	Up-regulated	6.11852	0.0150089
ENSG00000112706	IMPG1	Protein_Coding	Up-regulated	6.11852	0.0150089
ENSG00000177301	KCNA2	Protein_Coding	Up-regulated	4.7098	0.0150089
ENSG00000198842	STYXL2	Protein_Coding	Up-regulated	6.11852	0.0150089
ENSG00000261683	LINC00838	lncRNA	Up-regulated	6.11852	0.0150089
ENSG00000101280	ANGPT4	Protein_Coding	Up-regulated	6.11852	0.0150354
ENSG00000169752	NRG4	Protein_Coding	Up-regulated	6.11852	0.0150354
ENSG00000215458	AATBC	lncRNA	Up-regulated	6.86374	0.0150354
ENSG00000163581	SLC2A2	Protein_Coding	Up-regulated	4.67147	0.0152519
ENSG00000170608	FOXA3	Protein_Coding	Up-regulated	4.91167	0.0152519
ENSG00000076685	NT5C2	Protein_Coding	Down-regulated	-1.69363	0.0152524
ENSG00000260742	ITPRID2-DT	lncRNA	Up-regulated	4.21998	0.0152524
ENSG00000147613	PSKH2	Protein_Coding	Up-regulated	6.1989	0.01538
ENSG00000197953	AADACL2	Protein_Coding	Up-regulated	6.1989	0.01538
ENSG00000167178	ISLR2	Protein_Coding	Up-regulated	4.23626	0.0154257
ENSG00000134762	DSC3	Protein_Coding	Up-regulated	4.67704	0.0154552
ENSG00000136859	ANGPTL2	Protein_Coding	Up-regulated	2.48328	0.0156346
ENSG00000196372	ASB13	Protein_Coding	Down-regulated	-3.13281	0.0156766
ENSG00000180871	CXCR2	Protein_Coding	Up-regulated	6.5992	0.0157318
ENSG00000115593	SMYD1	Protein_Coding	Up-regulated	6.34563	0.0157406
ENSG00000092345	DAZL	Protein_Coding	Up-regulated	6.34563	0.0157522
ENSG00000091106	NLRC4	Protein_Coding	Up-regulated	4.10949	0.0157614
ENSG00000123119	NECAB1	Protein_Coding	Up-regulated	4.29309	0.0157614
ENSG00000155265	GOLGA7B	Protein_Coding	Up-regulated	4.7471	0.0157614
ENSG00000123901	GPR83	Protein_Coding	Up-regulated	4.7471	0.0157699
ENSG00000174306	ZHX3	Protein_Coding	Down-regulated	-1.70998	0.0157883
ENSG00000287878	ENSG00000287878	lncRNA	Up-regulated	4.27139	0.0157967
ENSG00000115464	USP34	Protein_Coding	Down-regulated	-1.75083	0.0158279
ENSG00000115474	KCNJ13	Protein_Coding	Up-regulated	6.81497	0.0158279
ENSG00000163882	POLR2H	Protein_Coding	Up-regulated	1.66616	0.0158279
ENSG00000166148	AVPR1A	Protein_Coding	Up-regulated	6.03137	0.0158279
ENSG00000227811	INKA2-AS1	lncRNA	Up-regulated	3.90638	0.0158279
ENSG00000233860	SHROOM3-AS1	lncRNA	Up-regulated	6.03137	0.0158279
ENSG00000253270	ENSG00000253270	lncRNA	Up-regulated	4.59202	0.0158279
ENSG00000236671	PRKG1-AS1	lncRNA	Up-regulated	3.50951	0.0159051
ENSG00000101746	NOL4	Protein_Coding	Up-regulated	6.03376	0.0159517
ENSG00000143199	ADCY10	Protein_Coding	Up-regulated	4.29533	0.0159517
ENSG00000198650	TAT	Protein_Coding	Up-regulated	6.03376	0.0159517
ENSG00000175077	RTP1	Protein_Coding	Up-regulated	6.03376	0.0159567
ENSG00000215217	C5orf49	Protein_Coding	Up-regulated	4.78344	0.0159567
ENSG00000100154	TTC28	Protein_Coding	Down-regulated	-2.5103	0.0159745
ENSG00000104320	NBN	Protein_Coding	Down-regulated	-1.85165	0.0159856
ENSG00000169679	BUB1	Protein_Coding	Down-regulated	-2.82698	0.0160333
ENSG00000050628	PTGER3	Protein_Coding	Up-regulated	4.333	0.0162273
ENSG00000107099	DOCK8	Protein_Coding	Up-regulated	3.69753	0.0162273
ENSG00000126351	THRA	Protein_Coding	Down-regulated	-2.10562	0.0163415
ENSG00000170921	TANC2	Protein_Coding	Down-regulated	-1.87936	0.0163743
ENSG00000171532	NEUROD2	Protein_Coding	Up-regulated	6.10668	0.0164693
ENSG00000259083	PNN-AS1	lncRNA	Up-regulated	6.72317	0.0164693
ENSG00000139220	PPFIA2	Protein_Coding	Up-regulated	6.10668	0.0164697
ENSG00000147724	FAM135B	Protein_Coding	Up-regulated	6.10668	0.0164697
ENSG00000128254	YWHAH-AS1	lncRNA	Up-regulated	4.241	0.0165976
ENSG00000227268	KLLN	Protein_Coding	Up-regulated	3.21656	0.0166776
ENSG00000120729	MYOT	Protein_Coding	Up-regulated	6.4791	0.016763
ENSG00000162006	MSLNL	Protein_Coding	Up-regulated	6.02896	0.016763
ENSG00000164122	ASB5	Protein_Coding	Up-regulated	6.02896	0.016763
ENSG00000169067	ACTBL2	Protein_Coding	Up-regulated	2.6441	0.016763
ENSG00000188580	NKAIN2	Protein_Coding	Up-regulated	4.54666	0.016763
ENSG00000188620	HMX3	Protein_Coding	Up-regulated	4.35894	0.016763
ENSG00000260992	DOCK9-DT	lncRNA	Up-regulated	3.83659	0.016763
ENSG00000272468	ENSG00000272468	lncRNA	Up-regulated	3.3188	0.016763
ENSG00000286575	ENSG00000286575	lncRNA	Up-regulated	6.02896	0.016763
ENSG00000287989	ENSG00000287989	lncRNA	Up-regulated	6.4791	0.016763
ENSG00000289311	ENSG00000289311	lncRNA	Up-regulated	4.53977	0.016763
ENSG00000232936	PANK1-AS1	lncRNA	Up-regulated	4.35978	0.016874
ENSG00000282317	ENSG00000282317	lncRNA	Up-regulated	6.44684	0.0168784
ENSG00000016490	CLCA1	Protein_Coding	Up-regulated	6.0362	0.0169763
ENSG00000159784	FAM131B	Protein_Coding	Up-regulated	4.36468	0.0169763
ENSG00000183324	REC114	Protein_Coding	Up-regulated	6.0362	0.0169763
ENSG00000184507	NUTM1	Protein_Coding	Up-regulated	6.0362	0.0169763
ENSG00000116703	PDC	Protein_Coding	Up-regulated	4.63838	0.0171701
ENSG00000135914	HTR2B	Protein_Coding	Up-regulated	4.63838	0.0171704
ENSG00000188290	HES4	Protein_Coding	Up-regulated	2.72123	0.0171713
ENSG00000019169	MARCO	Protein_Coding	Up-regulated	4.33183	0.0171809
ENSG00000072315	TRPC5	Protein_Coding	Up-regulated	6.12106	0.0172259
ENSG00000171885	AQP4	Protein_Coding	Up-regulated	6.12106	0.0172259
ENSG00000182175	RGMA	Protein_Coding	Up-regulated	3.08663	0.0172259
ENSG00000168348	INSM2	Protein_Coding	Up-regulated	5.21209	0.0172364
ENSG00000172985	SH3RF3	Protein_Coding	Down-regulated	-2.16897	0.0172514
ENSG00000161328	LRRC56	Protein_Coding	Up-regulated	3.15832	0.0173863
ENSG00000179133	C10orf67	Protein_Coding	Up-regulated	4.44213	0.0173863
ENSG00000205015	LINC02138	lncRNA	Up-regulated	4.55134	0.0173863
ENSG00000224965	KCNC4-DT	lncRNA	Up-regulated	4.64584	0.0173863
ENSG00000240006	LINC02004	lncRNA	Up-regulated	4.26532	0.0173863
ENSG00000196208	GREB1	Protein_Coding	Up-regulated	3.87104	0.0174416
ENSG00000003400	CASP10	Protein_Coding	Up-regulated	2.38596	0.0174484
ENSG00000156011	PSD3	Protein_Coding	Down-regulated	-1.96196	0.0174484
ENSG00000058335	RASGRF1	Protein_Coding	Up-regulated	4.30774	0.0177283
ENSG00000197653	DNAH10	Protein_Coding	Up-regulated	3.89479	0.0177283
ENSG00000213398	LCAT	Protein_Coding	Up-regulated	2.50991	0.0177713
ENSG00000169213	RAB3B	Protein_Coding	Up-regulated	2.17452	0.0178654
ENSG00000273335	ENSG00000273335	lncRNA	Up-regulated	4.61484	0.017958
ENSG00000075539	FRYL	Protein_Coding	Down-regulated	-1.68886	0.0180026
ENSG00000229951	FOSL2-AS1	lncRNA	Up-regulated	3.81729	0.018035
ENSG00000246130	ENSG00000246130	lncRNA	Up-regulated	3.91483	0.0181056
ENSG00000100439	ABHD4	Protein_Coding	Up-regulated	1.64483	0.0183024
ENSG00000253865	ENSG00000253865	lncRNA	Up-regulated	4.20603	0.0184246
ENSG00000147246	HTR2C	Protein_Coding	Up-regulated	6.20151	0.0184567
ENSG00000118322	ATP10B	Protein_Coding	Up-regulated	6.20151	0.0184715
ENSG00000068650	ATP11A	Protein_Coding	Down-regulated	-1.85613	0.0185594
ENSG00000122025	FLT3	Protein_Coding	Up-regulated	4.50109	0.0186385
ENSG00000157856	DRC1	Protein_Coding	Up-regulated	4.50109	0.0186385
ENSG00000172578	KLHL6	Protein_Coding	Up-regulated	4.59923	0.0186385
ENSG00000172890	NADSYN1	Protein_Coding	Up-regulated	1.75105	0.0186385
ENSG00000131686	CA6	Protein_Coding	Up-regulated	5.94647	0.0186831
ENSG00000139287	TPH2	Protein_Coding	Up-regulated	5.94647	0.0186831
ENSG00000290319	ENSG00000290319	lncRNA	Up-regulated	5.94647	0.0186831
ENSG00000287165	ENSG00000287165	lncRNA	Up-regulated	6.56243	0.018988
ENSG00000250302	LINC01618	lncRNA	Up-regulated	6.02642	0.0190223
ENSG00000254710	ENSG00000254710	lncRNA	Up-regulated	6.02642	0.0190223
ENSG00000269964	MEI4	Protein_Coding	Up-regulated	6.02642	0.0190223
ENSG00000213445	SIPA1	Protein_Coding	Down-regulated	-2.54076	0.0191202
ENSG00000143850	PLEKHA6	Protein_Coding	Up-regulated	3.46517	0.0191754
ENSG00000288755	ENSG00000288755	lncRNA	Up-regulated	7.22754	0.0191754
ENSG00000157873	TNFRSF14	Protein_Coding	Up-regulated	3.43159	0.0191771
ENSG00000181072	CHRM2	Protein_Coding	Up-regulated	4.32752	0.0191771
ENSG00000185215	TNFAIP2	Protein_Coding	Up-regulated	2.67272	0.0191771
ENSG00000288961	ENSG00000288961	lncRNA	Up-regulated	3.73316	0.0191863
ENSG00000130755	GMFG	Protein_Coding	Up-regulated	4.24687	0.019232
ENSG00000132855	ANGPTL3	Protein_Coding	Up-regulated	6.34819	0.0192602
ENSG00000144820	ADGRG7	Protein_Coding	Up-regulated	6.03878	0.0192602
ENSG00000152936	LMNTD1	Protein_Coding	Up-regulated	5.94399	0.0192602
ENSG00000182866	LCK	Protein_Coding	Up-regulated	5.94399	0.0192602
ENSG00000203710	CR1	Protein_Coding	Up-regulated	6.03878	0.0192602
ENSG00000215853	RPTN	Protein_Coding	Up-regulated	5.94399	0.0192602
ENSG00000262714	ENSG00000262714	lncRNA	Up-regulated	6.34819	0.0192602
ENSG00000175202	HIGD2B	Protein_Coding	Up-regulated	4.62609	0.0192619
ENSG00000186458	DEFB132	Protein_Coding	Up-regulated	6.03878	0.0192704
ENSG00000060140	STYK1	Protein_Coding	Up-regulated	4.02807	0.0193493
ENSG00000020633	RUNX3	Protein_Coding	Up-regulated	4.097	0.0193687
ENSG00000146166	LGSN	Protein_Coding	Up-regulated	5.94896	0.0193687
ENSG00000168918	INPP5D	Protein_Coding	Up-regulated	3.97249	0.0193687
ENSG00000169313	P2RY12	Protein_Coding	Up-regulated	5.94896	0.0193687
ENSG00000169750	RAC3	Protein_Coding	Down-regulated	-2.83745	0.0193687
ENSG00000274340	ENSG00000274340	lncRNA	Up-regulated	4.48139	0.0193687
ENSG00000158955	WNT9B	Protein_Coding	Up-regulated	5.94896	0.0193887
ENSG00000237716	ENSG00000237716	lncRNA	Up-regulated	5.94896	0.0193887
ENSG00000254689	LINC02235	lncRNA	Up-regulated	5.94896	0.0193887
ENSG00000083307	GRHL2	Protein_Coding	Up-regulated	6.6015	0.0194688
ENSG00000280721	LINC01943	lncRNA	Up-regulated	3.91719	0.019485
ENSG00000288857	ENSG00000288857	lncRNA	Up-regulated	4.70254	0.0195402
ENSG00000272209	ENSG00000272209	lncRNA	Up-regulated	6.10403	0.0197042
ENSG00000154310	TNIK	Protein_Coding	Down-regulated	-1.72508	0.019828
ENSG00000111348	ARHGDIB	Protein_Coding	Down-regulated	-1.75499	0.0198646
ENSG00000205413	SAMD9	Protein_Coding	Down-regulated	-1.84641	0.020003
ENSG00000105552	BCAT2	Protein_Coding	Down-regulated	-2.07658	0.0200155
ENSG00000146678	IGFBP1	Protein_Coding	Up-regulated	3.91288	0.0200345
ENSG00000226644	ENSG00000226644	lncRNA	Up-regulated	4.40793	0.0200973
ENSG00000082684	SEMA5B	Protein_Coding	Up-regulated	6.54278	0.0201569
ENSG00000112394	SLC16A10	Protein_Coding	Up-regulated	4.45391	0.0201569
ENSG00000143799	PARP1	Protein_Coding	Down-regulated	-1.65563	0.0201569
ENSG00000257474	ENSG00000257474	lncRNA	Up-regulated	6.54278	0.0201569
ENSG00000144231	POLR2D	Protein_Coding	Up-regulated	1.70984	0.0201975
ENSG00000113600	C9	Protein_Coding	Up-regulated	4.45587	0.0202056
ENSG00000145826	LECT2	Protein_Coding	Up-regulated	6.24961	0.0202056
ENSG00000160285	LSS	Protein_Coding	Down-regulated	-1.63763	0.0202056
ENSG00000229167	ENSG00000229167	lncRNA	Up-regulated	6.24961	0.0202056
ENSG00000272568	CPVL-AS2	lncRNA	Up-regulated	6.24961	0.0202056
ENSG00000114757	PEX5L	Protein_Coding	Up-regulated	4.7287	0.020312
ENSG00000135002	RFK	Protein_Coding	Up-regulated	1.63852	0.020312
ENSG00000173320	STOX2	Protein_Coding	Up-regulated	4.02129	0.020312
ENSG00000265313	LINC01476	lncRNA	Up-regulated	6.12374	0.0205273
ENSG00000079101	CLUL1	Protein_Coding	Up-regulated	6.12374	0.020544
ENSG00000105655	ISYNA1	Protein_Coding	Up-regulated	2.36338	0.0206093
ENSG00000174473	GALNTL6	Protein_Coding	Up-regulated	6.278	0.0206093
ENSG00000283286	ENSG00000283286	lncRNA	Up-regulated	6.278	0.0206093
ENSG00000151014	NOCT	Protein_Coding	Up-regulated	2.30503	0.0206124
ENSG00000103044	HAS3	Protein_Coding	Up-regulated	3.21112	0.02074
ENSG00000229915	ENSG00000229915	lncRNA	Up-regulated	4.10508	0.0207934
ENSG00000183044	ABAT	Protein_Coding	Down-regulated	-2.55379	0.0207983
ENSG00000142319	SLC6A3	Protein_Coding	Up-regulated	5.52621	0.0208342
ENSG00000176092	CRYBG2	Protein_Coding	Up-regulated	4.50586	0.0209385
ENSG00000197852	INKA2	Protein_Coding	Up-regulated	2.50803	0.0209385
ENSG00000175274	TP53I11	Protein_Coding	Up-regulated	1.8524	0.0210493
ENSG00000285018	ENSG00000285018	lncRNA	Up-regulated	4.6398	0.0210908
ENSG00000104450	SPAG1	Protein_Coding	Up-regulated	2.30848	0.0212087
ENSG00000161992	PRR35	Protein_Coding	Up-regulated	5.94141	0.0212595
ENSG00000205108	FAM205A	Protein_Coding	Up-regulated	5.94141	0.0212595
ENSG00000205929	C21orf62	Protein_Coding	Up-regulated	5.94141	0.0212595
ENSG00000016602	CLCA4	Protein_Coding	Up-regulated	5.94141	0.0212903
ENSG00000134504	KCTD1	Protein_Coding	Up-regulated	1.83236	0.0215367
ENSG00000019505	SYT13	Protein_Coding	Up-regulated	5.95158	0.021562
ENSG00000175198	PCCA	Protein_Coding	Down-regulated	-2.46774	0.021562
ENSG00000205611	LINC01597	lncRNA	Up-regulated	5.95158	0.021562
ENSG00000224875	EML4-AS1	lncRNA	Up-regulated	5.95159	0.021562
ENSG00000239593	ENSG00000239593	lncRNA	Up-regulated	6.44432	0.021562
ENSG00000271824	SMIM32	Protein_Coding	Up-regulated	5.95159	0.021562
ENSG00000162594	IL23R	Protein_Coding	Up-regulated	5.95159	0.0215799
ENSG00000177807	KCNJ10	Protein_Coding	Up-regulated	5.95159	0.0215799
ENSG00000228526	MIR34AHG	lncRNA	Up-regulated	2.28544	0.0215896
ENSG00000186265	BTLA	Protein_Coding	Up-regulated	3.98857	0.0216014
ENSG00000289540	ENSG00000289540	lncRNA	Up-regulated	6.72095	0.0216014
ENSG00000148175	STOM	Protein_Coding	Up-regulated	2.24506	0.0216409
ENSG00000259062	ACTN1-DT	lncRNA	Up-regulated	3.98088	0.0218119
ENSG00000254951	ENSG00000254951	lncRNA	Up-regulated	5.63689	0.0219743
ENSG00000260898	ADPGK-AS1	lncRNA	Up-regulated	4.52712	0.0220807
ENSG00000214336	FOXI3	Protein_Coding	Up-regulated	6.02372	0.0220976
ENSG00000222005	LINC01118	lncRNA	Up-regulated	6.02372	0.0220976
ENSG00000283064	ENSG00000283064	lncRNA	Up-regulated	3.92825	0.0220976
ENSG00000273784	ENSG00000273784	lncRNA	Up-regulated	4.64582	0.0221697
ENSG00000007866	TEAD3	Protein_Coding	Up-regulated	1.88452	0.0224945
ENSG00000042062	RIPOR3	Protein_Coding	Up-regulated	5.85619	0.0224945
ENSG00000069018	TRPC7	Protein_Coding	Up-regulated	5.85363	0.0224945
ENSG00000117115	PADI2	Protein_Coding	Up-regulated	4.15173	0.0224945
ENSG00000139144	PIK3C2G	Protein_Coding	Up-regulated	6.04154	0.0224945
ENSG00000142512	SIGLEC10	Protein_Coding	Up-regulated	6.04154	0.0224945
ENSG00000163362	INAVA	Protein_Coding	Up-regulated	5.85363	0.0224945
ENSG00000165409	TSHR	Protein_Coding	Up-regulated	5.85363	0.0224945
ENSG00000168070	MAJIN	Protein_Coding	Up-regulated	4.45828	0.0224945
ENSG00000168658	VWA3B	Protein_Coding	Up-regulated	5.85363	0.0224945
ENSG00000174015	CBY2	Protein_Coding	Up-regulated	5.85619	0.0224945
ENSG00000174453	VWC2L	Protein_Coding	Up-regulated	5.85363	0.0224945
ENSG00000177340	FLJ13224	lncRNA	Up-regulated	4.86577	0.0224945
ENSG00000178462	TUBAL3	Protein_Coding	Up-regulated	6.04154	0.0224945
ENSG00000178934	LGALS7B	Protein_Coding	Up-regulated	5.85619	0.0224945
ENSG00000213937	CLDN9	Protein_Coding	Up-regulated	4.264	0.0224945
ENSG00000225174	OSTM1-AS1	lncRNA	Up-regulated	5.85619	0.0224945
ENSG00000236501	ENSG00000236501	lncRNA	Up-regulated	6.04154	0.0224945
ENSG00000237596	ENSG00000237596	lncRNA	Up-regulated	4.04588	0.0224945
ENSG00000256422	LINC02552	lncRNA	Up-regulated	5.85619	0.0224945
ENSG00000260455	NBAT1	lncRNA	Up-regulated	5.85363	0.0224945
ENSG00000261272	MUC22	Protein_Coding	Up-regulated	6.04154	0.0224945
ENSG00000274317	LINC02334	lncRNA	Up-regulated	5.85619	0.0224945
ENSG00000282988	ENSG00000282988	Protein_Coding	Up-regulated	3.28066	0.0224945
ENSG00000284512	ENSG00000284512	Protein_Coding	Up-regulated	4.40409	0.0224945
ENSG00000289365	ENSG00000289365	lncRNA	Up-regulated	3.44225	0.0224945
ENSG00000246863	GPR176-DT	lncRNA	Up-regulated	4.21951	0.0225816
ENSG00000103021	CCDC113	Protein_Coding	Down-regulated	-3.24914	0.0226863
ENSG00000163082	SGPP2	Protein_Coding	Up-regulated	4.40992	0.0226863
ENSG00000177409	SAMD9L	Protein_Coding	Down-regulated	-2.55544	0.0226863
ENSG00000189233	NUGGC	Protein_Coding	Up-regulated	4.40743	0.0227222
ENSG00000287175	ENSG00000287175	lncRNA	Up-regulated	5.53031	0.022754
ENSG00000197892	KIF13B	Protein_Coding	Down-regulated	-1.71088	0.0229361
ENSG00000268500	SIGLEC5	Protein_Coding	Up-regulated	7.04755	0.0230003
ENSG00000185739	SRL	Protein_Coding	Up-regulated	4.53609	0.0230378
ENSG00000171056	SOX7	Protein_Coding	Up-regulated	3.70768	0.0230525
ENSG00000100714	MTHFD1	Protein_Coding	Down-regulated	-1.61964	0.0232499
ENSG00000168702	LRP1B	Protein_Coding	Up-regulated	3.9076	0.0232499
ENSG00000184984	CHRM5	Protein_Coding	Up-regulated	3.90659	0.0232499
ENSG00000182511	FES	Protein_Coding	Down-regulated	-3.30525	0.023333
ENSG00000253695	PINX1-DT	lncRNA	Up-regulated	4.54118	0.0233337
ENSG00000181634	TNFSF15	Protein_Coding	Up-regulated	6.03706	0.023356
ENSG00000272610	MAGI1-IT1	lncRNA	Up-regulated	4.14801	0.0233734
ENSG00000149792	MRPL49	Protein_Coding	Up-regulated	1.60762	0.0235133
ENSG00000112238	PRDM13	Protein_Coding	Up-regulated	6.31573	0.0237788
ENSG00000273760	ENSG00000273760	lncRNA	Up-regulated	6.31573	0.0237788
ENSG00000185527	PDE6G	Protein_Coding	Up-regulated	4.44673	0.0239286
ENSG00000244578	LINC01391	lncRNA	Up-regulated	4.4091	0.0239286
ENSG00000283839	ENSG00000283839	lncRNA	Up-regulated	4.44349	0.0239286
ENSG00000168843	FSTL5	Protein_Coding	Up-regulated	5.85101	0.0240814
ENSG00000228509	ENSG00000228509	lncRNA	Up-regulated	4.74135	0.024092
ENSG00000253293	HOXA10	Protein_Coding	Up-regulated	5.29099	0.024118
ENSG00000278330	ENSG00000278330	lncRNA	Up-regulated	4.98685	0.0241818
ENSG00000171804	WDR87	Protein_Coding	Up-regulated	4.46257	0.0242055
ENSG00000168772	CXXC4	Protein_Coding	Up-regulated	6.1012	0.024223
ENSG00000179219	LINC00311	lncRNA	Up-regulated	4.49398	0.024223
ENSG00000139219	COL2A1	Protein_Coding	Up-regulated	3.9416	0.024257
ENSG00000079112	CDH17	Protein_Coding	Up-regulated	4.45993	0.0242857
ENSG00000132464	ENAM	Protein_Coding	Up-regulated	4.45993	0.0242857
ENSG00000139330	KERA	Protein_Coding	Up-regulated	5.85885	0.0242857
ENSG00000160868	CYP3A4	Protein_Coding	Up-regulated	5.85885	0.0242857
ENSG00000175718	RBMXL3	Protein_Coding	Up-regulated	5.85885	0.0242857
ENSG00000231535	LINC00278	lncRNA	Up-regulated	5.85885	0.0242857
ENSG00000250891	LINC02208	lncRNA	Up-regulated	5.85885	0.0242857
ENSG00000269976	ENSG00000269976	lncRNA	Up-regulated	6.95282	0.0242857
ENSG00000255537	ENSG00000255537	lncRNA	Up-regulated	3.97697	0.0245705
ENSG00000106351	AGFG2	Protein_Coding	Down-regulated	-2.71306	0.024695
ENSG00000275410	HNF1B	Protein_Coding	Up-regulated	5.95437	0.024695
ENSG00000006047	YBX2	Protein_Coding	Up-regulated	4.0153	0.0246974
ENSG00000260034	LCMT1-AS2	lncRNA	Up-regulated	5.95437	0.0246974
ENSG00000101916	TLR8	Protein_Coding	Up-regulated	5.95438	0.0247742
ENSG00000107593	PKD2L1	Protein_Coding	Up-regulated	4.50909	0.0247742
ENSG00000174500	GCSAM	Protein_Coding	Up-regulated	6.12657	0.0247742
ENSG00000257642	C12orf75-AS1	lncRNA	Up-regulated	5.95438	0.0247742
ENSG00000259380	LINC02895	lncRNA	Up-regulated	5.93864	0.0247742
ENSG00000263724	DLGAP1-AS3	lncRNA	Up-regulated	6.12657	0.0247742
ENSG00000287512	ENSG00000287512	lncRNA	Up-regulated	5.93863	0.0247742
ENSG00000196700	ZNF512B	Protein_Coding	Down-regulated	-1.94108	0.0248029
ENSG00000117280	RAB29	Protein_Coding	Up-regulated	1.60677	0.0248227
ENSG00000259093	ENSG00000259093	lncRNA	Up-regulated	4.35894	0.0248227
ENSG00000138755	CXCL9	Protein_Coding	Up-regulated	5.95439	0.0248386
ENSG00000274238	ENSG00000274238	lncRNA	Up-regulated	5.95439	0.0248386
ENSG00000181026	AEN	Protein_Coding	Up-regulated	1.7231	0.0248757
ENSG00000064195	DLX3	Protein_Coding	Up-regulated	4.9019	0.0248829
ENSG00000287899	ENSG00000287899	lncRNA	Up-regulated	5.9544	0.0248829
ENSG00000117091	CD48	Protein_Coding	Up-regulated	5.9544	0.0248897
ENSG00000117322	CR2	Protein_Coding	Up-regulated	5.9544	0.0248897
ENSG00000255521	CD44-DT	lncRNA	Up-regulated	4.59176	0.0248897
ENSG00000257108	NHLRC4	Protein_Coding	Down-regulated	-3.74203	0.0248897
ENSG00000185187	SIGIRR	Protein_Coding	Down-regulated	-2.74261	0.024896
ENSG00000152256	PDK1	Protein_Coding	Down-regulated	-2.09796	0.0251435
ENSG00000198838	RYR3	Protein_Coding	Up-regulated	4.2498	0.0251705
ENSG00000256092	SBNO1-AS1	lncRNA	Up-regulated	3.2624	0.0251802
ENSG00000086619	ERO1B	Protein_Coding	Up-regulated	2.68048	0.0252164
ENSG00000136848	DAB2IP	Protein_Coding	Up-regulated	1.73032	0.0252164
ENSG00000148488	ST8SIA6	Protein_Coding	Up-regulated	3.83401	0.0252164
ENSG00000185924	RTN4RL1	Protein_Coding	Up-regulated	4.1305	0.0252164
ENSG00000180525	DIP2C-AS1	lncRNA	Up-regulated	3.98563	0.025254
ENSG00000124788	ATXN1	Protein_Coding	Down-regulated	-1.94592	0.0255663
ENSG00000242009	ENSG00000242009	lncRNA	Up-regulated	6.24681	0.0255663
ENSG00000167612	ANKRD33	Protein_Coding	Up-regulated	4.35378	0.0255928
ENSG00000167632	TRAPPC9	Protein_Coding	Down-regulated	-2.07426	0.0256343
ENSG00000196968	FUT11	Protein_Coding	Down-regulated	-1.98968	0.025674
ENSG00000100033	PRODH	Protein_Coding	Up-regulated	6.28078	0.0257281
ENSG00000133134	BEX2	Protein_Coding	Up-regulated	3.61364	0.0257281
ENSG00000185271	KLHL33	Protein_Coding	Up-regulated	4.44499	0.0259462
ENSG00000273674	ENSG00000273674	lncRNA	Up-regulated	3.9379	0.026213
ENSG00000142149	HUNK	Protein_Coding	Up-regulated	4.66254	0.0264082
ENSG00000182836	PLCXD3	Protein_Coding	Down-regulated	-2.12016	0.026494
ENSG00000140022	STON2	Protein_Coding	Up-regulated	3.8255	0.0265174
ENSG00000289578	ENSG00000289578	lncRNA	Up-regulated	4.79568	0.0265174
ENSG00000243927	MRPS6	Protein_Coding	Up-regulated	2.10651	0.0266547
ENSG00000184985	SORCS2	Protein_Coding	Up-regulated	4.52679	0.026661
ENSG00000185104	FAF1	Protein_Coding	Down-regulated	-2.05101	0.0269318
ENSG00000166831	RBPMS2	Protein_Coding	Up-regulated	3.75454	0.0271163
ENSG00000196152	ZNF79	Protein_Coding	Up-regulated	2.16695	0.0271163
ENSG00000143167	GPA33	Protein_Coding	Up-regulated	5.75714	0.0273056
ENSG00000149972	CNTN5	Protein_Coding	Up-regulated	5.75714	0.0273056
ENSG00000171004	HS6ST2	Protein_Coding	Up-regulated	5.75714	0.0273056
ENSG00000172209	GPR22	Protein_Coding	Up-regulated	5.75714	0.0273056
ENSG00000227192	ENSG00000227192	lncRNA	Up-regulated	4.80825	0.0273056
ENSG00000288877	ENSG00000288877	lncRNA	Up-regulated	4.48951	0.0273413
ENSG00000142910	TINAGL1	Protein_Coding	Up-regulated	2.08355	0.0275441
ENSG00000179520	SLC17A8	Protein_Coding	Up-regulated	4.30368	0.0276593
ENSG00000140832	MARVELD3	Protein_Coding	Up-regulated	6.04448	0.0277119
ENSG00000166265	CYYR1	Protein_Coding	Up-regulated	6.04448	0.0277119
ENSG00000179603	GRM8	Protein_Coding	Up-regulated	4.07126	0.0277119
ENSG00000117971	CHRNB4	Protein_Coding	Up-regulated	5.8482	0.0277557
ENSG00000110887	DAO	Protein_Coding	Up-regulated	5.8482	0.027773
ENSG00000135823	STX6	Protein_Coding	Up-regulated	1.76435	0.0278126
ENSG00000116667	C1orf21	Protein_Coding	Down-regulated	-2.32085	0.0278431
ENSG00000285820	ENSG00000285820	lncRNA	Up-regulated	6.48418	0.0279666
ENSG00000120332	TNN	Protein_Coding	Up-regulated	5.86171	0.028052
ENSG00000132437	DDC	Protein_Coding	Up-regulated	6.20714	0.028052
ENSG00000133020	MYH8	Protein_Coding	Up-regulated	5.86172	0.028052
ENSG00000134460	IL2RA	Protein_Coding	Up-regulated	5.75446	0.028052
ENSG00000141052	MYOCD	Protein_Coding	Up-regulated	5.75446	0.028052
ENSG00000145692	BHMT	Protein_Coding	Up-regulated	5.75446	0.028052
ENSG00000151577	DRD3	Protein_Coding	Up-regulated	5.86172	0.028052
ENSG00000164597	COG5	Protein_Coding	Down-regulated	-1.65943	0.028052
ENSG00000166004	CEP295	Protein_Coding	Down-regulated	-2.70853	0.028052
ENSG00000169248	CXCL11	Protein_Coding	Up-regulated	5.86172	0.028052
ENSG00000203506	RBMS3-AS2	lncRNA	Up-regulated	5.86172	0.028052
ENSG00000204148	LINC00474	lncRNA	Up-regulated	5.75446	0.028052
ENSG00000223646	ENSG00000223646	lncRNA	Up-regulated	5.75446	0.028052
ENSG00000228140	EFHD2-AS1	lncRNA	Up-regulated	5.75446	0.028052
ENSG00000230623	ENSG00000230623	lncRNA	Up-regulated	5.86171	0.028052
ENSG00000233387	IATPR	lncRNA	Up-regulated	5.75446	0.028052
ENSG00000233930	KRTAP5-AS1	lncRNA	Up-regulated	5.86172	0.028052
ENSG00000235615	ENSG00000235615	lncRNA	Up-regulated	5.75446	0.028052
ENSG00000237989	LINC01679	lncRNA	Up-regulated	5.75446	0.028052
ENSG00000271715	ENSG00000271715	lncRNA	Up-regulated	5.86172	0.028052
ENSG00000276180	H4C9	Protein_Coding	Up-regulated	3.61007	0.028052
ENSG00000286746	ENSG00000286746	lncRNA	Up-regulated	5.86172	0.028052
ENSG00000287788	ENSG00000287788	lncRNA	Up-regulated	3.87628	0.028052
ENSG00000070061	ELP1	Protein_Coding	Down-regulated	-1.5589	0.028072
ENSG00000100167	SEPTIN3	Protein_Coding	Up-regulated	4.18263	0.0281085
ENSG00000273084	ENSG00000273084	lncRNA	Up-regulated	3.28316	0.0281085
ENSG00000108091	CCDC6	Protein_Coding	Down-regulated	-1.58123	0.028226
ENSG00000163464	CXCR1	Protein_Coding	Up-regulated	5.75985	0.0283358
ENSG00000230628	ENSG00000230628	lncRNA	Up-regulated	5.75985	0.0283358
ENSG00000254656	RTL1	Protein_Coding	Up-regulated	5.75985	0.0283358
ENSG00000288805	ENSG00000288805	lncRNA	Up-regulated	5.75985	0.0283358
ENSG00000184571	PIWIL3	Protein_Coding	Up-regulated	5.75985	0.0283837
ENSG00000011198	ABHD5	Protein_Coding	Up-regulated	1.65527	0.0284472
ENSG00000106692	FKTN	Protein_Coding	Down-regulated	-1.57957	0.0286286
ENSG00000117020	AKT3	Protein_Coding	Down-regulated	-1.64606	0.0288411
ENSG00000254166	CASC19	lncRNA	Up-regulated	4.26667	0.0290127
ENSG00000000938	FGR	Protein_Coding	Up-regulated	4.46611	0.0292116
ENSG00000154229	PRKCA	Protein_Coding	Down-regulated	-1.89933	0.0294029
ENSG00000189060	H1-0	Protein_Coding	Up-regulated	1.82815	0.0294927
ENSG00000166960	CCDC178	Protein_Coding	Up-regulated	4.55831	0.0296448
ENSG00000176381	PRR18	Protein_Coding	Up-regulated	3.89486	0.0296448
ENSG00000179477	ALOX12B	Protein_Coding	Up-regulated	4.55831	0.0296605
ENSG00000169715	MT1E	Protein_Coding	Down-regulated	-2.71263	0.0297423
ENSG00000164331	ANKRA2	Protein_Coding	Up-regulated	1.71414	0.0298465
ENSG00000167291	TBC1D16	Protein_Coding	Down-regulated	-1.58772	0.0298465
ENSG00000277157	H4C4	Protein_Coding	Up-regulated	3.69096	0.0298465
ENSG00000105245	NUMBL	Protein_Coding	Down-regulated	-1.64566	0.029936
ENSG00000285899	ENSG00000285899	lncRNA	Up-regulated	6.42041	0.0300146
ENSG00000198125	MB	Protein_Coding	Up-regulated	5.9574	0.0300466
ENSG00000118729	CASQ2	Protein_Coding	Up-regulated	5.95741	0.0300698
ENSG00000161405	IKZF3	Protein_Coding	Up-regulated	3.83251	0.0300698
ENSG00000258583	LINC01500	lncRNA	Up-regulated	5.95741	0.0300698
ENSG00000260581	ENSG00000260581	lncRNA	Up-regulated	5.95741	0.0300698
ENSG00000136931	NR5A1	Protein_Coding	Up-regulated	5.93563	0.0302393
ENSG00000147509	RGS20	Protein_Coding	Up-regulated	2.3809	0.0302393
ENSG00000154274	C4orf19	Protein_Coding	Up-regulated	5.93563	0.0302393
ENSG00000188624	IGFL3	Protein_Coding	Up-regulated	5.93564	0.0302393
ENSG00000272226	ENSG00000272226	lncRNA	Up-regulated	5.93563	0.0302393
ENSG00000129467	ADCY4	Protein_Coding	Up-regulated	3.73957	0.0303422
ENSG00000164877	MICALL2	Protein_Coding	Up-regulated	1.63871	0.0305474
ENSG00000224687	RASAL2-AS1	lncRNA	Up-regulated	2.78609	0.0305474
ENSG00000168209	DDIT4	Protein_Coding	Down-regulated	-1.99765	0.030613
ENSG00000288103	ENSG00000288103	lncRNA	Up-regulated	3.90689	0.030656
ENSG00000286389	ENSG00000286389	lncRNA	Up-regulated	3.94732	0.0307746
ENSG00000174123	TLR10	Protein_Coding	Up-regulated	4.24707	0.0308612
ENSG00000265073	ENSG00000265073	lncRNA	Up-regulated	4.61987	0.0308697
ENSG00000138002	IFT172	Protein_Coding	Down-regulated	-2.14178	0.0308758
ENSG00000235711	ANKRD34C	Protein_Coding	Up-regulated	4.25314	0.0308778
ENSG00000144597	EAF1	Protein_Coding	Up-regulated	1.58632	0.0310984
ENSG00000186529	CYP4F3	Protein_Coding	Up-regulated	5.2123	0.0310984
ENSG00000250320	EDIL3-DT	lncRNA	Up-regulated	2.31572	0.0310984
ENSG00000146399	TAAR1	Protein_Coding	Up-regulated	6.12958	0.0312448
ENSG00000189433	GJB4	Protein_Coding	Up-regulated	6.12958	0.0312448
ENSG00000249700	SRD5A3-AS1	lncRNA	Up-regulated	3.80696	0.0314389
ENSG00000059573	ALDH18A1	Protein_Coding	Down-regulated	-1.53985	0.0314644
ENSG00000260000	ENSG00000260000	lncRNA	Up-regulated	3.51038	0.0315205
ENSG00000225206	MIR137HG	lncRNA	Up-regulated	2.68378	0.0315213
ENSG00000226125	LINC01907	lncRNA	Up-regulated	3.92233	0.0315213
ENSG00000081800	SLC13A1	Protein_Coding	Up-regulated	5.75161	0.0316015
ENSG00000134765	DSC1	Protein_Coding	Up-regulated	5.75161	0.0316015
ENSG00000135960	EDAR	Protein_Coding	Up-regulated	5.75161	0.0316015
ENSG00000198523	PLN	Protein_Coding	Up-regulated	4.65083	0.0316015
ENSG00000267943	ENSG00000267943	lncRNA	Up-regulated	5.75161	0.0316015
ENSG00000127824	TUBA4A	Protein_Coding	Up-regulated	1.94318	0.0318963
ENSG00000162882	HAAO	Protein_Coding	Up-regulated	3.98382	0.0318963
ENSG00000153132	CLGN	Protein_Coding	Up-regulated	4.24768	0.0319304
ENSG00000154342	WNT3A	Protein_Coding	Up-regulated	4.5744	0.0321128
ENSG00000225039	LINC01058	lncRNA	Up-regulated	4.12111	0.0321481
ENSG00000223883	LINC01707	lncRNA	Up-regulated	5.14922	0.0321913
ENSG00000259869	ENSG00000259869	lncRNA	Up-regulated	4.08723	0.0321913
ENSG00000103196	CRISPLD2	Protein_Coding	Up-regulated	2.35798	0.032196
ENSG00000108018	SORCS1	Protein_Coding	Up-regulated	4.34854	0.032196
ENSG00000131969	ABHD12B	Protein_Coding	Up-regulated	5.76275	0.032196
ENSG00000167910	CYP7A1	Protein_Coding	Up-regulated	5.76276	0.032196
ENSG00000170777	TPD52L3	Protein_Coding	Up-regulated	5.76276	0.032196
ENSG00000187862	TTC24	Protein_Coding	Up-regulated	5.76276	0.032196
ENSG00000188582	PAQR9	Protein_Coding	Up-regulated	3.77034	0.032196
ENSG00000236449	ENSG00000236449	lncRNA	Up-regulated	5.76276	0.032196
ENSG00000245293	CYP2U1-AS1	lncRNA	Up-regulated	3.65859	0.032196
ENSG00000253457	SMIM18	Protein_Coding	Up-regulated	5.76276	0.032196
ENSG00000260943	LINC02555	lncRNA	Up-regulated	5.76275	0.032196
ENSG00000286485	ENSG00000286485	lncRNA	Up-regulated	5.76275	0.032196
ENSG00000288007	ENSG00000288007	lncRNA	Up-regulated	4.34854	0.032196
ENSG00000178919	FOXE1	Protein_Coding	Up-regulated	4.28439	0.0322139
ENSG00000225172	ENSG00000225172	lncRNA	Up-regulated	5.76276	0.0322139
ENSG00000224382	LINC00703	lncRNA	Up-regulated	4.25501	0.0322271
ENSG00000254186	ENSG00000254186	lncRNA	Up-regulated	4.25501	0.0322271
ENSG00000262001	DLGAP1-AS2	lncRNA	Up-regulated	2.95237	0.0322271
ENSG00000271579	ENSG00000271579	lncRNA	Up-regulated	4.25501	0.0322271
ENSG00000106034	CPED1	Protein_Coding	Down-regulated	-2.34164	0.0323366
ENSG00000261183	SPINT1-AS1	lncRNA	Up-regulated	4.44137	0.0325078
ENSG00000198821	CD247	Protein_Coding	Up-regulated	4.25252	0.0325349
ENSG00000260641	TSPAN5-DT	lncRNA	Up-regulated	3.96961	0.0327221
ENSG00000236914	LINC01852	lncRNA	Up-regulated	3.74892	0.032812
ENSG00000107554	DNMBP	Protein_Coding	Down-regulated	-1.53413	0.0328522
ENSG00000253408	IKBKB-DT	lncRNA	Up-regulated	3.84531	0.0328522
ENSG00000154099	DNAAF1	Protein_Coding	Up-regulated	3.81794	0.0329678
ENSG00000196664	TLR7	Protein_Coding	Up-regulated	5.65088	0.0331554
ENSG00000272382	ENSG00000272382	lncRNA	Up-regulated	5.65088	0.0331665
ENSG00000184384	MAML2	Protein_Coding	Down-regulated	-1.77511	0.0331748
ENSG00000196979	GPRACR	lncRNA	Up-regulated	5.65088	0.0332027
ENSG00000102794	ACOD1	Protein_Coding	Up-regulated	5.84512	0.0332731
ENSG00000238279	ENSG00000238279	lncRNA	Up-regulated	5.84512	0.0332731
ENSG00000258028	ENSG00000258028	lncRNA	Up-regulated	5.84512	0.0332731
ENSG00000269915	ENSG00000269915	lncRNA	Up-regulated	5.65088	0.0332731
ENSG00000108839	ALOX12	Protein_Coding	Up-regulated	5.65088	0.0332904
ENSG00000156076	WIF1	Protein_Coding	Up-regulated	4.19197	0.0332904
ENSG00000164284	GRPEL2	Protein_Coding	Up-regulated	1.71929	0.0332904
ENSG00000286409	ENSG00000286409	lncRNA	Up-regulated	5.65088	0.0332904
ENSG00000290695	ENSG00000290695	lncRNA	Up-regulated	5.65088	0.0332904
ENSG00000188848	BEND4	Protein_Coding	Up-regulated	4.19383	0.0334033
ENSG00000260197	ENSG00000260197	lncRNA	Down-regulated	-4.15785	0.0334033
ENSG00000080618	CPB2	Protein_Coding	Up-regulated	5.65366	0.0334537
ENSG00000108439	PNPO	Protein_Coding	Up-regulated	1.71722	0.0334537
ENSG00000113722	CDX1	Protein_Coding	Up-regulated	5.65366	0.0334537
ENSG00000117226	GBP3	Protein_Coding	Down-regulated	-1.79224	0.0334537
ENSG00000145103	ILDR1	Protein_Coding	Up-regulated	5.86484	0.0334537
ENSG00000145721	LIX1	Protein_Coding	Up-regulated	6.2837	0.0334537
ENSG00000230805	ENSG00000230805	lncRNA	Up-regulated	5.65366	0.0334537
ENSG00000233290	ENSG00000233290	lncRNA	Up-regulated	5.86484	0.0334537
ENSG00000236333	TRHDE-AS1	lncRNA	Up-regulated	4.7169	0.0334537
ENSG00000245928	SDAD1-AS1	lncRNA	Up-regulated	5.65366	0.0334537
ENSG00000249267	LINC00939	lncRNA	Up-regulated	5.65366	0.0334537
ENSG00000250155	ENSG00000250155	lncRNA	Up-regulated	5.65366	0.0334537
ENSG00000250532	ENSG00000250532	lncRNA	Up-regulated	3.86611	0.0334537
ENSG00000253194	ENSG00000253194	lncRNA	Up-regulated	5.65366	0.0334537
ENSG00000255004	SLC1A2-AS1	lncRNA	Up-regulated	5.65366	0.0334537
ENSG00000279855	ENSG00000279855	lncRNA	Up-regulated	6.01769	0.0334537
ENSG00000283267	FAM237B	Protein_Coding	Up-regulated	6.61315	0.0334537
ENSG00000285492	ENSG00000285492	lncRNA	Up-regulated	5.65366	0.0334537
ENSG00000287526	ENSG00000287526	lncRNA	Up-regulated	5.86484	0.0334537
ENSG00000290097	ENSG00000290097	lncRNA	Up-regulated	5.65366	0.0334537
ENSG00000133243	BTBD2	Protein_Coding	Down-regulated	-1.50994	0.0335442
ENSG00000197530	MIB2	Protein_Coding	Up-regulated	1.59324	0.0336768
ENSG00000165240	ATP7A	Protein_Coding	Down-regulated	-1.70836	0.0337091
ENSG00000272476	ENSG00000272476	lncRNA	Up-regulated	3.126	0.0339615
ENSG00000288817	ENSG00000288817	lncRNA	Up-regulated	3.89663	0.0340074
ENSG00000126856	PRDM7	Protein_Coding	Up-regulated	6.0476	0.034013
ENSG00000183695	MRGPRX2	Protein_Coding	Up-regulated	6.0476	0.0340193
ENSG00000067066	SP100	Protein_Coding	Down-regulated	-1.52813	0.0340891
ENSG00000099769	IGFALS	Protein_Coding	Up-regulated	4.3135	0.0341958
ENSG00000122877	EGR2	Protein_Coding	Up-regulated	3.53384	0.0341958
ENSG00000184828	ZBTB7C	Protein_Coding	Up-regulated	4.41597	0.0341958
ENSG00000049089	COL9A2	Protein_Coding	Up-regulated	3.49912	0.0341968
ENSG00000116717	GADD45A	Protein_Coding	Up-regulated	1.75268	0.0341968
ENSG00000224173	LINC02831	lncRNA	Up-regulated	5.01442	0.0341968
ENSG00000180251	SLC9A4	Protein_Coding	Up-regulated	4.19569	0.0342849
ENSG00000154767	XPC	Protein_Coding	Up-regulated	1.54986	0.0344516
ENSG00000163239	TDRD10	Protein_Coding	Up-regulated	3.48866	0.0345336
ENSG00000165071	TMEM71	Protein_Coding	Up-regulated	3.83596	0.0345574
ENSG00000205832	C16orf96	Protein_Coding	Up-regulated	4.31081	0.0345574
ENSG00000276436	ENSG00000276436	lncRNA	Up-regulated	4.10051	0.0348044
ENSG00000196782	MAML3	Protein_Coding	Down-regulated	-3.20686	0.0351692
ENSG00000158246	TENT5B	Protein_Coding	Up-regulated	2.90722	0.035191
ENSG00000287054	ENSG00000287054	lncRNA	Up-regulated	4.1297	0.0353669
ENSG00000123500	COL10A1	Protein_Coding	Up-regulated	3.82145	0.0353844
ENSG00000150681	RGS18	Protein_Coding	Up-regulated	4.19473	0.0353844
ENSG00000089116	LHX5	Protein_Coding	Up-regulated	5.64802	0.0356276
ENSG00000110274	CEP164	Protein_Coding	Up-regulated	1.68076	0.0356276
ENSG00000137948	BRDT	Protein_Coding	Up-regulated	5.64802	0.0356276
ENSG00000138100	TRIM54	Protein_Coding	Up-regulated	5.64802	0.0356276
ENSG00000157060	SHCBP1L	Protein_Coding	Up-regulated	5.64802	0.0356276
ENSG00000166833	NAV2	Protein_Coding	Down-regulated	-1.73446	0.0356276
ENSG00000182578	CSF1R	Protein_Coding	Up-regulated	4.19062	0.0356276
ENSG00000184611	KCNH7	Protein_Coding	Up-regulated	5.64802	0.0356276
ENSG00000261572	ENSG00000261572	lncRNA	Up-regulated	5.64802	0.0356276
ENSG00000288994	ENSG00000288994	lncRNA	Up-regulated	5.64802	0.0356276
ENSG00000270164	LINC01480	lncRNA	Up-regulated	5.64802	0.0356768
ENSG00000115825	PRKD3	Protein_Coding	Down-regulated	-1.54186	0.035757
ENSG00000156162	DPY19L4	Protein_Coding	Down-regulated	-1.54315	0.0357727
ENSG00000157985	AGAP1	Protein_Coding	Down-regulated	-1.85332	0.035888
ENSG00000112078	KCTD20	Protein_Coding	Down-regulated	-1.53581	0.0359685
ENSG00000258457	AJUBA-DT	lncRNA	Up-regulated	3.27741	0.0360699
ENSG00000144583	MARCHF4	Protein_Coding	Up-regulated	1.53267	0.0361645
ENSG00000163545	NUAK2	Protein_Coding	Up-regulated	2.88795	0.0361798
ENSG00000124575	H1-3	Protein_Coding	Up-regulated	3.98	0.0361988
ENSG00000196739	COL27A1	Protein_Coding	Up-regulated	2.06737	0.0361988
ENSG00000198053	SIRPA	Protein_Coding	Up-regulated	1.72202	0.0361988
ENSG00000196341	OR8D1	Protein_Coding	Up-regulated	6.21018	0.0362925
ENSG00000183813	CCR4	Protein_Coding	Up-regulated	6.21018	0.0363217
ENSG00000147234	FRMPD3	Protein_Coding	Up-regulated	3.7067	0.0363277
ENSG00000267365	KCNJ2-AS1	lncRNA	Up-regulated	3.95686	0.0363277
ENSG00000272183	ENSG00000272183	lncRNA	Up-regulated	4.24141	0.0363277
ENSG00000184599	TAFA3	Protein_Coding	Up-regulated	4.19756	0.0364682
ENSG00000134830	C5AR2	Protein_Coding	Up-regulated	4.13508	0.0364752
ENSG00000135218	CD36	Protein_Coding	Up-regulated	3.68327	0.0364752
ENSG00000256262	USP30-AS1	lncRNA	Up-regulated	3.68327	0.0364752
ENSG00000149418	ST14	Protein_Coding	Up-regulated	3.57787	0.036526
ENSG00000167703	SLC43A2	Protein_Coding	Up-regulated	1.943	0.036526
ENSG00000116652	DLEU2L	lncRNA	Up-regulated	3.57564	0.0366476
ENSG00000130940	CASZ1	Protein_Coding	Up-regulated	3.96338	0.0367758
ENSG00000052850	ALX4	Protein_Coding	Up-regulated	5.65661	0.0369094
ENSG00000088827	SIGLEC1	Protein_Coding	Up-regulated	5.65661	0.0369094
ENSG00000121807	CCR2	Protein_Coding	Up-regulated	5.96066	0.0369094
ENSG00000134121	CHL1	Protein_Coding	Up-regulated	5.65661	0.0369094
ENSG00000164100	NDST3	Protein_Coding	Up-regulated	5.74848	0.0369094
ENSG00000164270	HTR4	Protein_Coding	Up-regulated	3.72709	0.0369094
ENSG00000165478	HEPACAM	Protein_Coding	Up-regulated	5.65661	0.0369094
ENSG00000180785	OR51E1	Protein_Coding	Up-regulated	5.65661	0.0369094
ENSG00000184454	NCMAP	Protein_Coding	Up-regulated	5.96066	0.0369094
ENSG00000227579	ENSG00000227579	lncRNA	Up-regulated	5.6566	0.0369094
ENSG00000251450	RASGRF2-AS1	lncRNA	Up-regulated	5.96066	0.0369094
ENSG00000259720	ENSG00000259720	lncRNA	Up-regulated	5.65661	0.0369094
ENSG00000261501	BBS7-DT	lncRNA	Up-regulated	5.74848	0.0369094
ENSG00000283324	CTXND2	Protein_Coding	Up-regulated	5.6566	0.0369094
ENSG00000287781	ENSG00000287781	lncRNA	Up-regulated	5.65661	0.0369094
ENSG00000155714	PDZD9	Protein_Coding	Up-regulated	5.74848	0.0369105
ENSG00000261308	FIGNL2	Protein_Coding	Up-regulated	5.74848	0.0369105
ENSG00000246792	ENSG00000246792	lncRNA	Up-regulated	3.47953	0.0371719
ENSG00000255587	RAB44	Protein_Coding	Up-regulated	3.73511	0.0372525
ENSG00000150051	MKX	Protein_Coding	Up-regulated	3.82664	0.0373958
ENSG00000075429	CACNG5	Protein_Coding	Up-regulated	5.76595	0.0376335
ENSG00000101349	PAK5	Protein_Coding	Up-regulated	5.76595	0.0376335
ENSG00000180730	SHISA2	Protein_Coding	Up-regulated	4.08303	0.0376335
ENSG00000203585	LINC02408	lncRNA	Up-regulated	5.76595	0.0376476
ENSG00000249738	ENSG00000249738	lncRNA	Up-regulated	5.76596	0.0377135
ENSG00000198829	SUCNR1	Protein_Coding	Up-regulated	3.49238	0.0377499
ENSG00000107186	MPDZ	Protein_Coding	Down-regulated	-1.54097	0.0378345
ENSG00000164050	PLXNB1	Protein_Coding	Up-regulated	1.70238	0.0379868
ENSG00000142765	SYTL1	Protein_Coding	Up-regulated	3.57741	0.0380978
ENSG00000187479	C11orf96	Protein_Coding	Up-regulated	2.87006	0.0381367
ENSG00000230838	LINC01614	lncRNA	Up-regulated	3.16048	0.0381367
ENSG00000186226	LCE1E	Protein_Coding	Up-regulated	6.48691	0.0382526
ENSG00000258616	LINC02303	lncRNA	Up-regulated	6.48691	0.0382526
ENSG00000235609	ENSG00000235609	lncRNA	Down-regulated	-3.30561	0.0383063
ENSG00000110400	NECTIN1	Protein_Coding	Up-regulated	2.01709	0.0384351
ENSG00000258088	ENSG00000258088	lncRNA	Up-regulated	4.24072	0.0384351
ENSG00000197587	DMBX1	Protein_Coding	Up-regulated	4.1409	0.038454
ENSG00000128335	APOL2	Protein_Coding	Up-regulated	1.58402	0.03903
ENSG00000147862	NFIB	Protein_Coding	Down-regulated	-2.19048	0.0390322
ENSG00000177098	SCN4B	Protein_Coding	Up-regulated	4.5195	0.0390322
ENSG00000138741	TRPC3	Protein_Coding	Up-regulated	3.73208	0.0390453
ENSG00000165140	FBP1	Protein_Coding	Up-regulated	3.73208	0.0390627
ENSG00000227258	SMIM2-AS1	lncRNA	Up-regulated	3.50915	0.0390627
ENSG00000184226	PCDH9	Protein_Coding	Up-regulated	2.09933	0.0391016
ENSG00000288533	ENSG00000288533	lncRNA	Up-regulated	3.65859	0.0391105
ENSG00000172915	NBEA	Protein_Coding	Down-regulated	-2.85452	0.0395847
ENSG00000272248	ENSG00000272248	lncRNA	Up-regulated	4.07296	0.0395847
ENSG00000008853	RHOBTB2	Protein_Coding	Down-regulated	-2.11014	0.0396924
ENSG00000253930	TNFRSF10A-AS1	lncRNA	Up-regulated	4.07296	0.0396924
ENSG00000081059	TCF7	Protein_Coding	Up-regulated	2.95769	0.0397056
ENSG00000137857	DUOX1	Protein_Coding	Up-regulated	4.0627	0.0398744
ENSG00000244040	IL12A-AS1	lncRNA	Up-regulated	5.53915	0.0398744
ENSG00000285041	ENSG00000285041	lncRNA	Up-regulated	5.53916	0.0398744
ENSG00000152078	TLCD4	Protein_Coding	Up-regulated	3.38121	0.0399012
ENSG00000251249	ENSG00000251249	lncRNA	Up-regulated	5.53916	0.0399321
ENSG00000066279	ASPM	Protein_Coding	Down-regulated	-2.26	0.0399388
ENSG00000103024	NME3	Protein_Coding	Down-regulated	-1.98802	0.0399388
ENSG00000137090	DMRT1	Protein_Coding	Up-regulated	5.53916	0.0399388
ENSG00000173389	IQCF1	Protein_Coding	Up-regulated	6.09498	0.0399388
ENSG00000174945	AMZ1	Protein_Coding	Up-regulated	4.5008	0.0399388
ENSG00000184305	CCSER1	Protein_Coding	Up-regulated	5.53916	0.0399388
ENSG00000256568	ENSG00000256568	lncRNA	Up-regulated	5.53916	0.0399388
ENSG00000256654	ENSG00000256654	lncRNA	Up-regulated	5.53916	0.0399388
ENSG00000007174	DNAH9	Protein_Coding	Up-regulated	5.53916	0.0399811
ENSG00000132932	ATP8A2	Protein_Coding	Up-regulated	3.65462	0.0399811
ENSG00000186790	FOXE3	Protein_Coding	Up-regulated	3.81556	0.0399811
ENSG00000143776	CDC42BPA	Protein_Coding	Down-regulated	-1.54574	0.0399901
ENSG00000036565	SLC18A1	Protein_Coding	Up-regulated	6.13276	0.0400036
ENSG00000100628	ASB2	Protein_Coding	Up-regulated	4.98408	0.0400036
ENSG00000101447	FAM83D	Protein_Coding	Up-regulated	2.01237	0.0400036
ENSG00000120903	CHRNA2	Protein_Coding	Up-regulated	6.13276	0.0400036
ENSG00000273348	ENSG00000273348	lncRNA	Up-regulated	5.53916	0.0400036
ENSG00000092847	AGO1	Protein_Coding	Down-regulated	-1.69356	0.0400065
ENSG00000245904	BTG1-DT	lncRNA	Up-regulated	3.47965	0.0402326
ENSG00000266401	ENSG00000266401	lncRNA	Up-regulated	3.72868	0.0402449
ENSG00000272192	PDE7A-DT	lncRNA	Up-regulated	3.55735	0.0402921
ENSG00000178175	ZNF366	Protein_Coding	Up-regulated	4.19785	0.0403676
ENSG00000118007	STAG1	Protein_Coding	Down-regulated	-1.55123	0.0403749
ENSG00000289034	ENSG00000289034	lncRNA	Up-regulated	4.65426	0.040603
ENSG00000226017	PRICKLE2-AS3	lncRNA	Up-regulated	4.07923	0.0409925
ENSG00000248587	GDNF-AS1	lncRNA	Up-regulated	3.74726	0.0409925
ENSG00000246548	LINC02288	lncRNA	Up-regulated	3.44133	0.0412672
ENSG00000143631	FLG	Protein_Coding	Up-regulated	3.90492	0.0413442
ENSG00000083782	EPYC	Protein_Coding	Up-regulated	5.53627	0.0414146
ENSG00000091664	SLC17A6	Protein_Coding	Up-regulated	5.53627	0.0414146
ENSG00000094755	GABRP	Protein_Coding	Up-regulated	5.53627	0.0414146
ENSG00000102271	KLHL4	Protein_Coding	Down-regulated	-1.56914	0.0414146
ENSG00000151365	THRSP	Protein_Coding	Up-regulated	5.53627	0.0414146
ENSG00000164002	EXO5	Protein_Coding	Up-regulated	2.08356	0.0414146
ENSG00000166569	CPLX4	Protein_Coding	Up-regulated	5.53627	0.0414146
ENSG00000167880	EVPL	Protein_Coding	Up-regulated	5.53627	0.0414146
ENSG00000234203	ENSG00000234203	lncRNA	Up-regulated	5.53627	0.0414146
ENSG00000253394	LINC00534	lncRNA	Up-regulated	5.53627	0.0414146
ENSG00000286981	ENSG00000286981	lncRNA	Up-regulated	5.53627	0.0414146
ENSG00000289991	ENSG00000289991	lncRNA	Up-regulated	5.84176	0.0414146
ENSG00000290778	ENSG00000290778	lncRNA	Up-regulated	5.84176	0.0414146
ENSG00000152818	UTRN	Protein_Coding	Down-regulated	-1.50535	0.0415668
ENSG00000183691	NOG	Protein_Coding	Up-regulated	3.71545	0.0415668
ENSG00000092200	RPGRIP1	Protein_Coding	Up-regulated	4.36706	0.0415792
ENSG00000116299	ELAPOR1	Protein_Coding	Up-regulated	2.966	0.0415792
ENSG00000148482	SLC39A12	Protein_Coding	Up-regulated	5.64485	0.0415911
ENSG00000267439	ENSG00000267439	lncRNA	Up-regulated	5.64484	0.0416619
ENSG00000236283	ENSG00000236283	lncRNA	Up-regulated	3.67034	0.0417176
ENSG00000157470	FAM81A	Protein_Coding	Up-regulated	3.45004	0.0418245
ENSG00000010932	FMO1	Protein_Coding	Up-regulated	5.54209	0.0418289
ENSG00000100170	SLC5A1	Protein_Coding	Up-regulated	5.86825	0.0418289
ENSG00000135925	WNT10A	Protein_Coding	Up-regulated	5.54209	0.0418289
ENSG00000141376	BCAS3	Protein_Coding	Down-regulated	-2.20694	0.0418289
ENSG00000164287	CDC20B	Protein_Coding	Up-regulated	4.14042	0.0418289
ENSG00000164300	SERINC5	Protein_Coding	Up-regulated	2.05103	0.0418289
ENSG00000168509	HJV	Protein_Coding	Up-regulated	5.54209	0.0418289
ENSG00000183185	GABRR3	Protein_Coding	Up-regulated	5.86825	0.0418289
ENSG00000255158	ENSG00000255158	lncRNA	Up-regulated	5.54209	0.0418289
ENSG00000261573	ENSG00000261573	lncRNA	Up-regulated	5.54209	0.0418289
ENSG00000265728	ENSG00000265728	lncRNA	Up-regulated	5.54209	0.0418289
ENSG00000278514	ENSG00000278514	lncRNA	Up-regulated	3.57271	0.0418289
ENSG00000283039	KLF18	Protein_Coding	Up-regulated	5.54209	0.0418289
ENSG00000286071	ENSG00000286071	lncRNA	Up-regulated	5.54209	0.0418289
ENSG00000286347	ENSG00000286347	lncRNA	Up-regulated	5.54209	0.0418289
ENSG00000286536	ENSG00000286536	lncRNA	Up-regulated	5.54209	0.0418289
ENSG00000287990	ENSG00000287990	lncRNA	Up-regulated	5.86825	0.0418289
ENSG00000101958	GLRA2	Protein_Coding	Up-regulated	5.54209	0.0418293
ENSG00000120280	TASL	Protein_Coding	Up-regulated	5.54209	0.0418293
ENSG00000153002	CPB1	Protein_Coding	Up-regulated	5.54209	0.0418293
ENSG00000237863	IRS4-AS1	lncRNA	Up-regulated	5.54209	0.0418293
ENSG00000249421	ADAMTS19-AS1	lncRNA	Up-regulated	5.5421	0.0418293
ENSG00000253891	ENSG00000253891	lncRNA	Up-regulated	5.54209	0.0418293
ENSG00000085741	WNT11	Protein_Coding	Up-regulated	3.55701	0.0419492
ENSG00000198483	ANKRD35	Protein_Coding	Down-regulated	-2.54561	0.0419492
ENSG00000126391	FRMD8	Protein_Coding	Up-regulated	1.51012	0.0420217
ENSG00000101230	ISM1	Protein_Coding	Up-regulated	4.24583	0.0425755
ENSG00000150768	DLAT	Protein_Coding	Down-regulated	-1.69708	0.0426945
ENSG00000119715	ESRRB	Protein_Coding	Up-regulated	3.77946	0.0427392
ENSG00000147883	CDKN2B	Protein_Coding	Up-regulated	2.02428	0.043034
ENSG00000229140	CCDC26	lncRNA	Up-regulated	3.83725	0.0431205
ENSG00000276462	LINC03025	lncRNA	Up-regulated	6.35663	0.0431205
ENSG00000095110	NXPE1	Protein_Coding	Up-regulated	5.65988	0.0432263
ENSG00000100146	SOX10	Protein_Coding	Up-regulated	5.65988	0.0432263
ENSG00000100503	NIN	Protein_Coding	Down-regulated	-1.58515	0.0432263
ENSG00000122733	PHF24	Protein_Coding	Up-regulated	3.77475	0.0432263
ENSG00000134538	SLCO1B1	Protein_Coding	Up-regulated	5.65988	0.0432263
ENSG00000135097	MSI1	Protein_Coding	Up-regulated	5.65988	0.0432263
ENSG00000146285	SCML4	Protein_Coding	Up-regulated	5.65988	0.0432263
ENSG00000150676	CCDC83	Protein_Coding	Up-regulated	5.65988	0.0432263
ENSG00000198670	LPA	Protein_Coding	Up-regulated	5.65988	0.0432263
ENSG00000221826	PSG3	Protein_Coding	Up-regulated	5.65988	0.0432263
ENSG00000234745	HLA-B	Protein_Coding	Up-regulated	1.47687	0.0432263
ENSG00000259225	LINC02345	lncRNA	Up-regulated	5.65988	0.0432263
ENSG00000106992	AK1	Protein_Coding	Up-regulated	1.98194	0.0432385
ENSG00000205835	GMNC	Protein_Coding	Up-regulated	3.77773	0.0432385
ENSG00000223711	ENSG00000223711	lncRNA	Up-regulated	4.08826	0.0432499
ENSG00000230731	LINC02938	lncRNA	Up-regulated	4.01282	0.0432499
ENSG00000185774	KCNIP4	Protein_Coding	Up-regulated	4.3175	0.0433379
ENSG00000118922	KLF12	Protein_Coding	Down-regulated	-1.7182	0.0433576
ENSG00000129204	USP6	Protein_Coding	Up-regulated	4.0813	0.0433576
ENSG00000233154	LINC01762	lncRNA	Up-regulated	4.0813	0.0433576
ENSG00000290096	ENSG00000290096	lncRNA	Up-regulated	3.70313	0.0433576
ENSG00000290549	ENSG00000290549	lncRNA	Up-regulated	4.0813	0.0433576
ENSG00000248975	ENSG00000248975	lncRNA	Up-regulated	4.20412	0.0434185
ENSG00000107537	PHYH	Protein_Coding	Up-regulated	1.49537	0.0435288
ENSG00000248362	ENSG00000248362	lncRNA	Up-regulated	5.13377	0.0435288
ENSG00000138193	PLCE1	Protein_Coding	Down-regulated	-2.37082	0.0435417
ENSG00000233828	MIR4280HG	lncRNA	Up-regulated	4.01057	0.0435417
ENSG00000077327	SPAG6	Protein_Coding	Up-regulated	6.05094	0.0436145
ENSG00000104888	SLC17A7	Protein_Coding	Up-regulated	3.46001	0.0441348
ENSG00000235660	LINC00345	lncRNA	Up-regulated	3.42747	0.0441348
ENSG00000286522	H3C2	Protein_Coding	Up-regulated	3.81105	0.0443041
ENSG00000157077	ZFYVE9	Protein_Coding	Down-regulated	-1.53193	0.0445568
ENSG00000119685	TTLL5	Protein_Coding	Down-regulated	-1.92358	0.0448999
ENSG00000117228	GBP1	Protein_Coding	Down-regulated	-2.9383	0.0450207
ENSG00000120868	APAF1	Protein_Coding	Up-regulated	1.55049	0.0450574
ENSG00000145248	SLC10A4	Protein_Coding	Up-regulated	3.65757	0.0451135
ENSG00000291231	ENSG00000291231	lncRNA	Up-regulated	6.8702	0.0453512
ENSG00000124225	PMEPA1	Protein_Coding	Up-regulated	1.75429	0.0454641
ENSG00000250961	RMEL3	lncRNA	Up-regulated	3.11086	0.0456314
ENSG00000289319	ENSG00000289319	lncRNA	Up-regulated	4.09637	0.045669
ENSG00000103657	HERC1	Protein_Coding	Down-regulated	-1.54791	0.0458163
ENSG00000131650	KREMEN2	Protein_Coding	Up-regulated	4.13265	0.045918
ENSG00000104447	TRPS1	Protein_Coding	Down-regulated	-2.41524	0.046174
ENSG00000178573	MAF	Protein_Coding	Up-regulated	3.84225	0.046198
ENSG00000116132	PRRX1	Protein_Coding	Down-regulated	-1.56105	0.0462747
ENSG00000163762	TM4SF18	Protein_Coding	Up-regulated	4.14504	0.0462747
ENSG00000172350	ABCG4	Protein_Coding	Up-regulated	3.29381	0.0462747
ENSG00000225140	ENSG00000225140	lncRNA	Up-regulated	5.745	0.0462747
ENSG00000227115	LINC01630	lncRNA	Up-regulated	4.00878	0.0462747
ENSG00000230534	ENSG00000230534	lncRNA	Up-regulated	5.74499	0.0462747
ENSG00000274492	ENSG00000274492	lncRNA	Up-regulated	5.74499	0.0462747
ENSG00000141627	DYM	Protein_Coding	Down-regulated	-1.58649	0.0466054
ENSG00000147041	SYTL5	Protein_Coding	Up-regulated	3.86742	0.0466054
ENSG00000166851	PLK1	Protein_Coding	Down-regulated	-2.42671	0.0466054
ENSG00000171189	GRIK1	Protein_Coding	Up-regulated	5.76947	0.0466054
ENSG00000187513	GJA4	Protein_Coding	Down-regulated	-5.8537	0.0466054
ENSG00000189127	ANKRD34B	Protein_Coding	Up-regulated	5.76948	0.0466054
ENSG00000198911	SREBF2	Protein_Coding	Down-regulated	-1.44246	0.0466054
ENSG00000204851	PNMA8B	Protein_Coding	Down-regulated	-3.46746	0.0466054
ENSG00000229807	XIST	lncRNA	Up-regulated	5.76947	0.0466054
ENSG00000287201	ENSG00000287201	lncRNA	Up-regulated	5.76947	0.0466054
ENSG00000287367	ENSG00000287367	lncRNA	Up-regulated	4.26002	0.0466054
ENSG00000291007	ENSG00000291007	lncRNA	Up-regulated	5.76948	0.0466054
ENSG00000162896	PIGR	Protein_Coding	Up-regulated	5.76948	0.0466101
ENSG00000166863	TAC3	Protein_Coding	Up-regulated	4.0693	0.0467949
ENSG00000169896	ITGAM	Protein_Coding	Up-regulated	4.14241	0.0467949
ENSG00000141682	PMAIP1	Protein_Coding	Up-regulated	2.92106	0.0471176
ENSG00000179363	TMEM31	Protein_Coding	Up-regulated	4.01697	0.0472238
ENSG00000173114	LRRN3	Protein_Coding	Up-regulated	3.6891	0.0473755
ENSG00000108384	RAD51C	Protein_Coding	Up-regulated	1.75249	0.0474262
ENSG00000173714	WFIKKN2	Protein_Coding	Up-regulated	4.01462	0.0474262
ENSG00000188937	NYX	Protein_Coding	Up-regulated	5.53308	0.0474262
ENSG00000285700	ENSG00000285700	lncRNA	Up-regulated	5.53308	0.0474262
ENSG00000287381	ENSG00000287381	lncRNA	Up-regulated	6.82164	0.0474936
ENSG00000143333	RGS16	Protein_Coding	Up-regulated	3.27144	0.047514
ENSG00000075945	KIFAP3	Protein_Coding	Down-regulated	-1.66887	0.0475617
ENSG00000276900	ENSG00000276900	lncRNA	Up-regulated	3.33579	0.0476604
ENSG00000237166	LINC01792	lncRNA	Up-regulated	3.77015	0.0477569
ENSG00000235890	TSPEAR-AS1	lncRNA	Up-regulated	3.34205	0.0477774
ENSG00000168959	GRM5	Protein_Coding	Up-regulated	4.18481	0.0478726
ENSG00000006071	ABCC8	Protein_Coding	Up-regulated	5.96416	0.0478746
ENSG00000165392	WRN	Protein_Coding	Down-regulated	-1.91856	0.0478746
ENSG00000170091	NSG2	Protein_Coding	Up-regulated	3.68953	0.0478746
ENSG00000170703	TTLL6	Protein_Coding	Up-regulated	5.96416	0.0478746
ENSG00000248673	LINC01331	lncRNA	Up-regulated	5.96416	0.0478746
ENSG00000267327	ENSG00000267327	lncRNA	Up-regulated	5.96416	0.0478746
ENSG00000111725	PRKAB1	Protein_Coding	Up-regulated	1.51502	0.0479192
ENSG00000070214	SLC44A1	Protein_Coding	Down-regulated	-2.30461	0.0479644
ENSG00000077279	DCX	Protein_Coding	Up-regulated	5.54536	0.0479644
ENSG00000102699	PARP4	Protein_Coding	Down-regulated	-1.54141	0.0479644
ENSG00000104760	FGL1	Protein_Coding	Up-regulated	5.54536	0.0479644
ENSG00000124557	BTN1A1	Protein_Coding	Up-regulated	5.54536	0.0479644
ENSG00000131050	BPIFA2	Protein_Coding	Up-regulated	5.54536	0.0479644
ENSG00000133710	SPINK5	Protein_Coding	Up-regulated	5.54537	0.0479644
ENSG00000169570	DTWD2	Protein_Coding	Down-regulated	-2.99301	0.0479644
ENSG00000171617	ENC1	Protein_Coding	Up-regulated	1.67497	0.0479644
ENSG00000173156	RHOD	Protein_Coding	Up-regulated	2.01681	0.0479644
ENSG00000178522	AMBN	Protein_Coding	Up-regulated	5.54537	0.0479644
ENSG00000178795	GDPD4	Protein_Coding	Up-regulated	5.54536	0.0479644
ENSG00000198785	GRIN3A	Protein_Coding	Up-regulated	5.54536	0.0479644
ENSG00000226051	ZNF503-AS1	lncRNA	Up-regulated	5.54536	0.0479644
ENSG00000242428	CFAP20DC-AS1	lncRNA	Up-regulated	5.54537	0.0479644
ENSG00000253720	ENSG00000253720	lncRNA	Up-regulated	5.54536	0.0479644
ENSG00000254416	LINC02732	lncRNA	Up-regulated	5.54536	0.0479644
ENSG00000285847	ENSG00000285847	lncRNA	Up-regulated	5.54537	0.0479644
ENSG00000286649	ENSG00000286649	lncRNA	Up-regulated	5.54536	0.0479644
ENSG00000287709	ENSG00000287709	lncRNA	Up-regulated	5.54537	0.0479644
ENSG00000167912	TOX-DT	lncRNA	Up-regulated	4.25626	0.0481524
ENSG00000164128	NPY1R	Protein_Coding	Up-regulated	4.06569	0.0481787
ENSG00000125910	S1PR4	Protein_Coding	Up-regulated	6.15043	0.0484268
ENSG00000196660	SLC30A10	Protein_Coding	Up-regulated	4.28855	0.0484268
ENSG00000287787	ENSG00000287787	lncRNA	Up-regulated	3.31219	0.0484268
ENSG00000173517	PEAK1	Protein_Coding	Down-regulated	-1.45141	0.0486833
ENSG00000101236	RNF24	Protein_Coding	Down-regulated	-1.45631	0.0486851
ENSG00000101977	MCF2	Protein_Coding	Up-regulated	3.37576	0.0489275
ENSG00000165899	OTOGL	Protein_Coding	Up-regulated	2.85104	0.0490232
ENSG00000235300	SKAP1-AS2	lncRNA	Up-regulated	5.41495	0.0490232
ENSG00000235488	JARID2-AS1	lncRNA	Up-regulated	5.41495	0.0490232
ENSG00000250166	C2CD5-AS1	lncRNA	Up-regulated	5.41495	0.0490232
ENSG00000283148	ENSG00000283148	lncRNA	Up-regulated	5.41495	0.0490232
ENSG00000285802	ENSG00000285802	lncRNA	Up-regulated	3.75491	0.0490232
ENSG00000171435	KSR2	Protein_Coding	Up-regulated	5.41495	0.0490262
ENSG00000173401	GLIPR1L1	Protein_Coding	Up-regulated	5.41495	0.0490262
ENSG00000113391	FAM172A	Protein_Coding	Down-regulated	-1.74676	0.0490472
ENSG00000105963	ADAP1	Protein_Coding	Down-regulated	-3.35566	0.0490973
ENSG00000125533	BHLHE23	Protein_Coding	Up-regulated	5.41495	0.0490973
ENSG00000231131	LNCAROD	lncRNA	Up-regulated	4.50683	0.0490973
ENSG00000070193	FGF10	Protein_Coding	Up-regulated	5.41792	0.0492219
ENSG00000073670	ADAM11	Protein_Coding	Up-regulated	3.34852	0.0492219
ENSG00000101347	SAMHD1	Protein_Coding	Down-regulated	-1.69438	0.0492219
ENSG00000102893	PHKB	Protein_Coding	Down-regulated	-1.48942	0.0492219
ENSG00000114455	HHLA2	Protein_Coding	Up-regulated	5.41792	0.0492219
ENSG00000120907	ADRA1A	Protein_Coding	Up-regulated	5.41791	0.0492219
ENSG00000128250	RFPL1	Protein_Coding	Up-regulated	5.41792	0.0492219
ENSG00000135824	RGS8	Protein_Coding	Up-regulated	5.41792	0.0492219
ENSG00000152430	BOLL	Protein_Coding	Up-regulated	5.41792	0.0492219
ENSG00000165606	DRGX	Protein_Coding	Up-regulated	5.41791	0.0492219
ENSG00000169836	TACR3	Protein_Coding	Up-regulated	5.41792	0.0492219
ENSG00000173578	XCR1	Protein_Coding	Up-regulated	5.41792	0.0492219
ENSG00000183918	SH2D1A	Protein_Coding	Up-regulated	5.41791	0.0492219
ENSG00000185621	LMLN	Protein_Coding	Down-regulated	-2.1017	0.0492219
ENSG00000226251	LINC02608	lncRNA	Up-regulated	3.77351	0.0492219
ENSG00000237074	LINC02942	lncRNA	Up-regulated	5.41792	0.0492219
ENSG00000244265	SIAH2-AS1	lncRNA	Up-regulated	3.92252	0.0492219
ENSG00000283078	ENSG00000283078	lncRNA	Up-regulated	3.72085	0.0492219
ENSG00000286092	ENSG00000286092	lncRNA	Up-regulated	5.41791	0.0492219
ENSG00000128731	HERC2	Protein_Coding	Down-regulated	-1.47529	0.0492415
ENSG00000275236	ENSG00000275236	lncRNA	Up-regulated	3.46819	0.0492469
ENSG00000111536	IL26	Protein_Coding	Up-regulated	4.00672	0.0492547
ENSG00000182580	EPHB3	Protein_Coding	Up-regulated	2.98813	0.0492547
ENSG00000175318	GRAMD2A	Protein_Coding	Up-regulated	3.62952	0.0492897
ENSG00000257453	PHLDA1-AS1	lncRNA	Up-regulated	3.79179	0.0494265
ENSG00000123329	ARHGAP9	Protein_Coding	Up-regulated	3.272	0.0494951
ENSG00000260830	ENSG00000260830	lncRNA	Up-regulated	3.59461	0.0497753
ENSG00000268621	IGFL2-AS1	lncRNA	Up-regulated	5.33665	0.0499276
ENSG00000109670	FBXW7	Protein_Coding	Up-regulated	1.66158	0.0499444

## Sheet: Table_S2
Supplementary Table S2. List of differentially expressed protein-coding and lncRNA genes in DOX-treated cells compared to the control cells (HFFs with CRISPR-mediated p130 knockout, GSE135842).
Ensembl_ID	Gene_symbol	Biotype	Expression	logFC	FDR
ENSG00000166851	PLK1	Protein_Coding	Down-regulated	-6.01465	4.94e-110
ENSG00000151640	DPYSL4	Protein_Coding	Up-regulated	4.68786	1.4e-108
ENSG00000175063	UBE2C	Protein_Coding	Down-regulated	-5.33742	8.01e-106
ENSG00000131747	TOP2A	Protein_Coding	Down-regulated	-4.91766	1.91e-101
ENSG00000130066	SAT1	Protein_Coding	Up-regulated	4.1413	8.2e-99
ENSG00000171848	RRM2	Protein_Coding	Down-regulated	-3.82673	5.76e-88
ENSG00000184678	H2BC21	Protein_Coding	Up-regulated	3.91775	1.12e-87
ENSG00000065320	NTN1	Protein_Coding	Up-regulated	6.38034	5.09e-85
ENSG00000158406	H4C8	Protein_Coding	Up-regulated	5.18748	1.21e-82
ENSG00000278828	H3C10	Protein_Coding	Up-regulated	5.89327	3.67e-82
ENSG00000185668	POU3F1	Protein_Coding	Up-regulated	12.375	5.28e-82
ENSG00000092853	CLSPN	Protein_Coding	Down-regulated	-4.76016	1.31e-80
ENSG00000159251	ACTC1	Protein_Coding	Down-regulated	-3.82113	1.84e-80
ENSG00000055163	CYFIP2	Protein_Coding	Up-regulated	3.86444	2.45e-78
ENSG00000124635	H2BC11	Protein_Coding	Up-regulated	5.29986	4.27e-78
ENSG00000178999	AURKB	Protein_Coding	Down-regulated	-5.11272	5.61e-78
ENSG00000089685	BIRC5	Protein_Coding	Down-regulated	-4.3249	4.94e-77
ENSG00000183856	IQGAP3	Protein_Coding	Down-regulated	-4.66251	8.16e-77
ENSG00000112984	KIF20A	Protein_Coding	Down-regulated	-4.58196	9.8e-77
ENSG00000148773	MKI67	Protein_Coding	Down-regulated	-4.75893	1.31e-76
ENSG00000115129	TP53I3	Protein_Coding	Up-regulated	3.99005	7.08e-74
ENSG00000237649	KIFC1	Protein_Coding	Down-regulated	-4.45191	1.65e-73
ENSG00000196562	SULF2	Protein_Coding	Up-regulated	3.48159	2.29e-73
ENSG00000090776	EFNB1	Protein_Coding	Up-regulated	3.87049	5.78e-73
ENSG00000106484	MEST	Protein_Coding	Up-regulated	4.11035	5.57e-72
ENSG00000135423	GLS2	Protein_Coding	Up-regulated	7.60943	2.55e-71
ENSG00000101057	MYBL2	Protein_Coding	Down-regulated	-3.99561	3.74e-71
ENSG00000068489	PRR11	Protein_Coding	Down-regulated	-4.51477	5.85e-70
ENSG00000164104	HMGB2	Protein_Coding	Down-regulated	-3.65631	1.36e-69
ENSG00000161888	SPC24	Protein_Coding	Down-regulated	-4.94804	3.11e-66
ENSG00000159388	BTG2	Protein_Coding	Up-regulated	3.34119	5.22e-66
ENSG00000128510	CPA4	Protein_Coding	Up-regulated	4.07358	7.95e-66
ENSG00000104689	TNFRSF10A	Protein_Coding	Up-regulated	3.7259	2.48e-65
ENSG00000170312	CDK1	Protein_Coding	Down-regulated	-4.49544	3.37e-65
ENSG00000248429	GASK1B-AS1	lncRNA	Up-regulated	6.17651	1.38e-62
ENSG00000110900	TSPAN11	Protein_Coding	Up-regulated	3.53784	1.41e-60
ENSG00000171241	SHCBP1	Protein_Coding	Down-regulated	-4.43704	2.93e-59
ENSG00000117399	CDC20	Protein_Coding	Down-regulated	-4.00119	6.04e-59
ENSG00000075218	GTSE1	Protein_Coding	Down-regulated	-4.80517	9.65e-59
ENSG00000183114	FAM43B	Protein_Coding	Up-regulated	4.62775	1.86e-58
ENSG00000080986	NDC80	Protein_Coding	Down-regulated	-5.22837	2.49e-58
ENSG00000277075	H2AC8	Protein_Coding	Up-regulated	5.47005	9.52e-57
ENSG00000273802	H2BC8	Protein_Coding	Up-regulated	5.05524	2.3e-56
ENSG00000137975	CLCA2	Protein_Coding	Up-regulated	6.32929	3.02e-56
ENSG00000272468	ENSG00000272468	lncRNA	Up-regulated	5.34514	3.94e-56
ENSG00000123485	HJURP	Protein_Coding	Down-regulated	-3.58769	1.65e-55
ENSG00000179163	FUCA1	Protein_Coding	Up-regulated	3.31931	2.71e-55
ENSG00000013810	TACC3	Protein_Coding	Down-regulated	-3.28384	5.63e-55
ENSG00000161513	FDXR	Protein_Coding	Up-regulated	3.19942	3.95e-54
ENSG00000111206	FOXM1	Protein_Coding	Down-regulated	-3.50674	6.49e-54
ENSG00000117724	CENPF	Protein_Coding	Down-regulated	-3.66477	8.87e-54
ENSG00000166592	RRAD	Protein_Coding	Up-regulated	4.85419	2.73e-53
ENSG00000163347	CLDN1	Protein_Coding	Up-regulated	3.82349	2.98e-53
ENSG00000164125	GASK1B	Protein_Coding	Up-regulated	5.2885	6.31e-53
ENSG00000138160	KIF11	Protein_Coding	Down-regulated	-4.40048	1.35e-52
ENSG00000166145	SPINT1	Protein_Coding	Up-regulated	4.38177	1.4e-52
ENSG00000182253	SYNM	Protein_Coding	Up-regulated	3.58831	2.76e-51
ENSG00000290792	ENSG00000290792	lncRNA	Up-regulated	3.91449	4.03e-51
ENSG00000069812	HES2	Protein_Coding	Up-regulated	7.73983	1.11e-50
ENSG00000156970	BUB1B	Protein_Coding	Down-regulated	-5.06694	2.27e-50
ENSG00000088325	TPX2	Protein_Coding	Down-regulated	-2.91991	3.24e-50
ENSG00000290791	ENSG00000290791	lncRNA	Up-regulated	3.86673	7.5e-50
ENSG00000260912	ENSG00000260912	lncRNA	Up-regulated	4.39222	7.51e-50
ENSG00000145386	CCNA2	Protein_Coding	Down-regulated	-4.08663	1.42e-49
ENSG00000242732	RTL5	Protein_Coding	Up-regulated	2.94011	3.08e-49
ENSG00000142945	KIF2C	Protein_Coding	Down-regulated	-3.74973	5.8e-49
ENSG00000077152	UBE2T	Protein_Coding	Down-regulated	-3.83411	2.09e-48
ENSG00000168497	CAVIN2	Protein_Coding	Up-regulated	3.43949	2.92e-48
ENSG00000158373	H2BC5	Protein_Coding	Up-regulated	2.90504	3.4e-48
ENSG00000168672	LRATD2	Protein_Coding	Up-regulated	4.16355	1.3e-47
ENSG00000186185	KIF18B	Protein_Coding	Down-regulated	-4.77486	1.3e-47
ENSG00000080546	SESN1	Protein_Coding	Up-regulated	2.98125	1.37e-47
ENSG00000113368	LMNB1	Protein_Coding	Down-regulated	-3.6384	1.9e-47
ENSG00000167513	CDT1	Protein_Coding	Down-regulated	-3.87475	1.99e-47
ENSG00000161642	ZNF385A	Protein_Coding	Up-regulated	2.8247	2.84e-47
ENSG00000109805	NCAPG	Protein_Coding	Down-regulated	-4.48432	6.23e-47
ENSG00000165304	MELK	Protein_Coding	Down-regulated	-4.01834	6.23e-47
ENSG00000163584	RPL22L1	Protein_Coding	Down-regulated	-3.63659	1.12e-46
ENSG00000196787	H2AC11	Protein_Coding	Up-regulated	6.19647	1.15e-46
ENSG00000003137	CYP26B1	Protein_Coding	Up-regulated	2.89478	3.62e-46
ENSG00000154839	SKA1	Protein_Coding	Down-regulated	-4.51103	4.15e-46
ENSG00000197852	INKA2	Protein_Coding	Up-regulated	3.22341	1.43e-45
ENSG00000265763	ZNF488	Protein_Coding	Up-regulated	3.89765	1.65e-44
ENSG00000013297	CLDN11	Protein_Coding	Up-regulated	3.14252	2.23e-44
ENSG00000132819	RBM38	Protein_Coding	Up-regulated	2.95543	4.4e-44
ENSG00000130513	GDF15	Protein_Coding	Up-regulated	3.44318	5.17e-44
ENSG00000093009	CDC45	Protein_Coding	Down-regulated	-3.82086	1.93e-43
ENSG00000125538	IL1B	Protein_Coding	Up-regulated	2.60048	2.19e-43
ENSG00000090889	KIF4A	Protein_Coding	Down-regulated	-4.19247	2.89e-43
ENSG00000178184	PARD6G	Protein_Coding	Up-regulated	3.55006	4.8e-43
ENSG00000187837	H1-2	Protein_Coding	Up-regulated	3.2323	2.23e-42
ENSG00000111665	CDCA3	Protein_Coding	Down-regulated	-3.44937	2.31e-42
ENSG00000121152	NCAPH	Protein_Coding	Down-regulated	-4.03274	3.89e-42
ENSG00000125148	MT2A	Protein_Coding	Down-regulated	-2.93011	5.14e-42
ENSG00000138166	DUSP5	Protein_Coding	Up-regulated	2.65916	1.26e-41
ENSG00000115884	SDC1	Protein_Coding	Up-regulated	2.98939	4.29e-41
ENSG00000120889	TNFRSF10B	Protein_Coding	Up-regulated	2.54438	4.55e-41
ENSG00000095397	WHRN	Protein_Coding	Up-regulated	2.87435	8.11e-41
ENSG00000011426	ANLN	Protein_Coding	Down-regulated	-3.07181	9.37e-41
ENSG00000188486	H2AX	Protein_Coding	Down-regulated	-2.71241	2.33e-40
ENSG00000128422	KRT17	Protein_Coding	Up-regulated	3.01888	2.66e-40
ENSG00000166803	PCLAF	Protein_Coding	Down-regulated	-4.91925	2.89e-40
ENSG00000127564	PKMYT1	Protein_Coding	Down-regulated	-3.57012	3.39e-40
ENSG00000168078	PBK	Protein_Coding	Down-regulated	-4.99548	9.87e-40
ENSG00000180573	H2AC6	Protein_Coding	Up-regulated	3.05592	1.14e-39
ENSG00000169715	MT1E	Protein_Coding	Down-regulated	-2.76735	1.3e-39
ENSG00000079616	KIF22	Protein_Coding	Down-regulated	-2.73683	2.69e-39
ENSG00000092470	WDR76	Protein_Coding	Down-regulated	-4.62118	2.81e-39
ENSG00000166897	ELFN2	Protein_Coding	Up-regulated	2.88147	2.81e-39
ENSG00000131711	MAP1B	Protein_Coding	Down-regulated	-2.43589	7.51e-39
ENSG00000137310	TCF19	Protein_Coding	Down-regulated	-3.09002	7.75e-39
ENSG00000198074	AKR1B10	Protein_Coding	Up-regulated	3.97618	1.77e-38
ENSG00000089486	CDIP1	Protein_Coding	Up-regulated	2.98569	3.57e-38
ENSG00000138061	CYP1B1	Protein_Coding	Up-regulated	3.37247	4.15e-38
ENSG00000100526	CDKN3	Protein_Coding	Down-regulated	-3.593	4.35e-38
ENSG00000162772	ATF3	Protein_Coding	Up-regulated	3.51437	6.17e-38
ENSG00000076382	SPAG5	Protein_Coding	Down-regulated	-3.60533	6.28e-38
ENSG00000180155	LYNX1	Protein_Coding	Up-regulated	2.84989	6.83e-38
ENSG00000152253	SPC25	Protein_Coding	Down-regulated	-5.52151	7.84e-38
ENSG00000282988	ENSG00000282988	Protein_Coding	Up-regulated	4.641	7.84e-38
ENSG00000277586	NEFL	Protein_Coding	Up-regulated	7.04988	1.12e-37
ENSG00000092068	SLC7A8	Protein_Coding	Up-regulated	2.27759	1.3e-37
ENSG00000162643	DNAI3	Protein_Coding	Up-regulated	3.75465	1.3e-37
ENSG00000122952	ZWINT	Protein_Coding	Down-regulated	-2.77723	2.54e-37
ENSG00000140682	TGFB1I1	Protein_Coding	Down-regulated	-2.54378	4.45e-37
ENSG00000137807	KIF23	Protein_Coding	Down-regulated	-3.21162	6.07e-37
ENSG00000133131	MORC4	Protein_Coding	Up-regulated	2.70595	3.5e-36
ENSG00000134222	PSRC1	Protein_Coding	Down-regulated	-3.41557	4.62e-36
ENSG00000115163	CENPA	Protein_Coding	Down-regulated	-5.72557	4.96e-36
ENSG00000062038	CDH3	Protein_Coding	Up-regulated	4.61433	5.05e-36
ENSG00000165480	SKA3	Protein_Coding	Down-regulated	-4.66519	6.69e-36
ENSG00000143816	WNT9A	Protein_Coding	Up-regulated	3.84227	8.66e-36
ENSG00000167992	VWCE	Protein_Coding	Up-regulated	3.71428	9.4e-36
ENSG00000223573	TINCR	Protein_Coding	Up-regulated	4.38984	9.4e-36
ENSG00000168918	INPP5D	Protein_Coding	Up-regulated	4.11668	1.27e-35
ENSG00000177076	ACER2	Protein_Coding	Up-regulated	4.26019	1.43e-35
ENSG00000173535	TNFRSF10C	Protein_Coding	Up-regulated	4.2142	1.94e-35
ENSG00000164938	TP53INP1	Protein_Coding	Up-regulated	2.83881	2.67e-35
ENSG00000142731	PLK4	Protein_Coding	Down-regulated	-4.99536	4.79e-35
ENSG00000120875	DUSP4	Protein_Coding	Up-regulated	2.25098	5.64e-35
ENSG00000169679	BUB1	Protein_Coding	Down-regulated	-4.3142	6.01e-35
ENSG00000143228	NUF2	Protein_Coding	Down-regulated	-5.26783	6.31e-35
ENSG00000144485	HES6	Protein_Coding	Up-regulated	4.75175	1.17e-34
ENSG00000276043	UHRF1	Protein_Coding	Down-regulated	-3.29724	1.26e-34
ENSG00000146670	CDCA5	Protein_Coding	Down-regulated	-3.36397	3.25e-34
ENSG00000134690	CDCA8	Protein_Coding	Down-regulated	-3.33528	3.45e-34
ENSG00000233276	GPX1	Protein_Coding	Up-regulated	2.76298	3.84e-34
ENSG00000103202	NME4	Protein_Coding	Down-regulated	-2.33386	3.87e-34
ENSG00000110876	SELPLG	Protein_Coding	Up-regulated	3.30319	6.25e-34
ENSG00000134057	CCNB1	Protein_Coding	Down-regulated	-2.53385	7.67e-34
ENSG00000138180	CEP55	Protein_Coding	Down-regulated	-3.26664	9.8e-34
ENSG00000140022	STON2	Protein_Coding	Up-regulated	4.56541	1.13e-33
ENSG00000144452	ABCA12	Protein_Coding	Up-regulated	9.87417	1.13e-33
ENSG00000172831	CES2	Protein_Coding	Up-regulated	2.14089	1.38e-33
ENSG00000144554	FANCD2	Protein_Coding	Down-regulated	-3.75181	1.45e-33
ENSG00000135451	TROAP	Protein_Coding	Down-regulated	-4.24721	1.6e-33
ENSG00000099814	CEP170B	Protein_Coding	Up-regulated	2.41271	1.63e-33
ENSG00000189410	SH2D5	Protein_Coding	Up-regulated	3.19087	2.44e-33
ENSG00000188916	INSYN2A	Protein_Coding	Up-regulated	6.57737	3.4e-33
ENSG00000123416	TUBA1B	Protein_Coding	Down-regulated	-2.24481	3.57e-33
ENSG00000148344	PTGES	Protein_Coding	Up-regulated	2.28483	4.44e-33
ENSG00000142619	PADI3	Protein_Coding	Up-regulated	7.54483	7.02e-33
ENSG00000167900	TK1	Protein_Coding	Down-regulated	-2.85785	7.68e-33
ENSG00000104228	TRIM35	Protein_Coding	Up-regulated	2.28958	9.15e-33
ENSG00000186871	ERCC6L	Protein_Coding	Down-regulated	-5.01085	1.03e-32
ENSG00000162063	CCNF	Protein_Coding	Down-regulated	-2.91385	1.27e-32
ENSG00000166016	ABTB2	Protein_Coding	Up-regulated	2.8199	1.61e-32
ENSG00000149503	INCENP	Protein_Coding	Down-regulated	-2.73858	2.1e-32
ENSG00000103044	HAS3	Protein_Coding	Up-regulated	4.36668	3.41e-32
ENSG00000196747	H2AC13	Protein_Coding	Up-regulated	6.40798	3.41e-32
ENSG00000170271	FAXDC2	Protein_Coding	Up-regulated	2.61398	3.45e-32
ENSG00000177595	PIDD1	Protein_Coding	Up-regulated	2.86825	3.53e-32
ENSG00000166508	MCM7	Protein_Coding	Down-regulated	-2.44964	4.24e-32
ENSG00000274180	NATD1	Protein_Coding	Up-regulated	2.57033	5.71e-32
ENSG00000196730	DAPK1	Protein_Coding	Up-regulated	3.46258	7.84e-32
ENSG00000131153	GINS2	Protein_Coding	Down-regulated	-3.34298	1.25e-31
ENSG00000116717	GADD45A	Protein_Coding	Up-regulated	2.06359	1.53e-31
ENSG00000135476	ESPL1	Protein_Coding	Down-regulated	-3.77757	1.97e-31
ENSG00000197093	GAL3ST4	Protein_Coding	Up-regulated	2.66763	2.14e-31
ENSG00000122966	CIT	Protein_Coding	Down-regulated	-3.09742	2.51e-31
ENSG00000132517	SLC52A1	Protein_Coding	Up-regulated	4.97924	3.34e-31
ENSG00000187017	ESPN	Protein_Coding	Up-regulated	6.58308	4.22e-31
ENSG00000136378	ADAMTS7	Protein_Coding	Up-regulated	2.9899	4.52e-31
ENSG00000197903	H2BC12	Protein_Coding	Up-regulated	2.61177	6.63e-31
ENSG00000165272	AQP3	Protein_Coding	Up-regulated	3.32416	8.84e-31
ENSG00000182175	RGMA	Protein_Coding	Up-regulated	5.63638	9.54e-31
ENSG00000180596	H2BC4	Protein_Coding	Up-regulated	3.42747	9.98e-31
ENSG00000213347	MXD3	Protein_Coding	Down-regulated	-3.38612	1.11e-30
ENSG00000051180	RAD51	Protein_Coding	Down-regulated	-3.7031	2.91e-30
ENSG00000151689	INPP1	Protein_Coding	Up-regulated	2.27064	4.23e-30
ENSG00000172890	NADSYN1	Protein_Coding	Up-regulated	2.39246	7.7e-30
ENSG00000060138	YBX3	Protein_Coding	Up-regulated	2.08993	8.77e-30
ENSG00000105011	ASF1B	Protein_Coding	Down-regulated	-2.48459	1.01e-29
ENSG00000157456	CCNB2	Protein_Coding	Down-regulated	-2.58949	1.04e-29
ENSG00000071539	TRIP13	Protein_Coding	Down-regulated	-2.78904	1.06e-29
ENSG00000100297	MCM5	Protein_Coding	Down-regulated	-2.19287	1.23e-29
ENSG00000277287	ENSG00000277287	lncRNA	Up-regulated	2.7095	1.74e-29
ENSG00000163808	KIF15	Protein_Coding	Down-regulated	-4.51082	3.25e-29
ENSG00000095203	EPB41L4B	Protein_Coding	Up-regulated	5.02354	3.36e-29
ENSG00000198901	PRC1	Protein_Coding	Down-regulated	-5.05584	3.45e-29
ENSG00000135047	CTSL	Protein_Coding	Up-regulated	2.06135	7.38e-29
ENSG00000265096	C1QTNF1-AS1	lncRNA	Up-regulated	5.71133	8.52e-29
ENSG00000111247	RAD51AP1	Protein_Coding	Down-regulated	-3.69039	9.06e-29
ENSG00000141052	MYOCD	Protein_Coding	Down-regulated	-2.46252	1.29e-28
ENSG00000042445	RETSAT	Protein_Coding	Up-regulated	2.12466	1.48e-28
ENSG00000171617	ENC1	Protein_Coding	Up-regulated	2.11295	1.57e-28
ENSG00000111981	ULBP1	Protein_Coding	Up-regulated	3.27468	1.68e-28
ENSG00000128342	LIF	Protein_Coding	Up-regulated	2.74523	2.13e-28
ENSG00000168824	NSG1	Protein_Coding	Up-regulated	6.59434	3.07e-28
ENSG00000158769	F11R	Protein_Coding	Up-regulated	3.65325	3.29e-28
ENSG00000029534	ANK1	Protein_Coding	Up-regulated	2.114	4.61e-28
ENSG00000088836	SLC4A11	Protein_Coding	Up-regulated	2.85799	5.05e-28
ENSG00000158402	CDC25C	Protein_Coding	Down-regulated	-4.20225	5.05e-28
ENSG00000119630	PGF	Protein_Coding	Up-regulated	2.3405	7.31e-28
ENSG00000244509	APOBEC3C	Protein_Coding	Up-regulated	1.9479	8.14e-28
ENSG00000158055	GRHL3	Protein_Coding	Up-regulated	5.43653	9.68e-28
ENSG00000163431	LMOD1	Protein_Coding	Down-regulated	-2.17269	1.96e-27
ENSG00000087085	ACHE	Protein_Coding	Up-regulated	4.46436	2.26e-27
ENSG00000154040	CABYR	Protein_Coding	Up-regulated	2.79748	3.43e-27
ENSG00000257167	TMPO-AS1	lncRNA	Down-regulated	-4.19312	3.57e-27
ENSG00000143401	ANP32E	Protein_Coding	Down-regulated	-2.68904	4.52e-27
ENSG00000100439	ABHD4	Protein_Coding	Up-regulated	2.01873	5.02e-27
ENSG00000170385	SLC30A1	Protein_Coding	Up-regulated	2.60299	5.29e-27
ENSG00000078237	TIGAR	Protein_Coding	Up-regulated	2.72073	5.77e-27
ENSG00000168621	GDNF	Protein_Coding	Up-regulated	2.53524	9.42e-27
ENSG00000066279	ASPM	Protein_Coding	Down-regulated	-5.21469	1.17e-26
ENSG00000116754	SRSF11	Protein_Coding	Down-regulated	-1.97851	1.65e-26
ENSG00000105825	TFPI2	Protein_Coding	Up-regulated	2.02905	1.71e-26
ENSG00000274290	H2BC6	Protein_Coding	Up-regulated	3.61388	2.13e-26
ENSG00000102804	TSC22D1	Protein_Coding	Up-regulated	1.94092	2.22e-26
ENSG00000136492	BRIP1	Protein_Coding	Down-regulated	-3.47457	2.47e-26
ENSG00000119986	AVPI1	Protein_Coding	Up-regulated	2.33951	3.6e-26
ENSG00000075702	WDR62	Protein_Coding	Down-regulated	-3.11961	5.84e-26
ENSG00000072571	HMMR	Protein_Coding	Down-regulated	-4.9542	6.33e-26
ENSG00000111348	ARHGDIB	Protein_Coding	Down-regulated	-3.27262	6.34e-26
ENSG00000214517	PPME1	Protein_Coding	Up-regulated	2.07931	6.45e-26
ENSG00000060656	PTPRU	Protein_Coding	Up-regulated	2.13926	7.17e-26
ENSG00000094804	CDC6	Protein_Coding	Down-regulated	-2.58081	7.29e-26
ENSG00000139734	DIAPH3	Protein_Coding	Down-regulated	-3.41402	7.77e-26
ENSG00000205978	NYNRIN	Protein_Coding	Up-regulated	2.26453	1.22e-25
ENSG00000137812	KNL1	Protein_Coding	Down-regulated	-4.85608	1.23e-25
ENSG00000177106	EPS8L2	Protein_Coding	Up-regulated	2.11787	1.49e-25
ENSG00000101412	E2F1	Protein_Coding	Down-regulated	-2.4531	1.5e-25
ENSG00000123080	CDKN2C	Protein_Coding	Down-regulated	-2.29033	1.5e-25
ENSG00000164070	HSPA4L	Protein_Coding	Up-regulated	2.87062	2.05e-25
ENSG00000126787	DLGAP5	Protein_Coding	Down-regulated	-4.2913	2.21e-25
ENSG00000177791	MYOZ1	Protein_Coding	Down-regulated	-3.33239	2.46e-25
ENSG00000100504	PYGL	Protein_Coding	Up-regulated	1.9612	2.99e-25
ENSG00000205426	KRT81	Protein_Coding	Down-regulated	-2.40234	3.01e-25
ENSG00000153162	BMP6	Protein_Coding	Up-regulated	4.5353	3.57e-25
ENSG00000143333	RGS16	Protein_Coding	Up-regulated	5.81271	3.66e-25
ENSG00000172828	CES3	Protein_Coding	Up-regulated	5.87454	3.7e-25
ENSG00000117650	NEK2	Protein_Coding	Down-regulated	-4.41978	4.94e-25
ENSG00000013016	EHD3	Protein_Coding	Up-regulated	1.89601	5.01e-25
ENSG00000132274	TRIM22	Protein_Coding	Up-regulated	1.96772	5.18e-25
ENSG00000129810	SGO1	Protein_Coding	Down-regulated	-4.975	5.2e-25
ENSG00000161800	RACGAP1	Protein_Coding	Down-regulated	-2.22664	6.34e-25
ENSG00000140525	FANCI	Protein_Coding	Down-regulated	-2.42381	6.4e-25
ENSG00000090020	SLC9A1	Protein_Coding	Up-regulated	1.97196	7.46e-25
ENSG00000164294	GPX8	Protein_Coding	Down-regulated	-2.15898	1.28e-24
ENSG00000134107	BHLHE40	Protein_Coding	Up-regulated	2.08756	1.34e-24
ENSG00000174371	EXO1	Protein_Coding	Down-regulated	-3.53853	1.51e-24
ENSG00000076003	MCM6	Protein_Coding	Down-regulated	-2.53623	1.68e-24
ENSG00000100162	CENPM	Protein_Coding	Down-regulated	-3.34805	1.89e-24
ENSG00000163956	LRPAP1	Protein_Coding	Up-regulated	1.97912	1.89e-24
ENSG00000189057	FAM111B	Protein_Coding	Down-regulated	-5.27695	1.95e-24
ENSG00000130821	SLC6A8	Protein_Coding	Up-regulated	1.91807	2.15e-24
ENSG00000138271	GPR87	Protein_Coding	Up-regulated	9.16371	2.15e-24
ENSG00000169750	RAC3	Protein_Coding	Down-regulated	-3.30486	4.34e-24
ENSG00000005469	CROT	Protein_Coding	Up-regulated	2.30557	4.72e-24
ENSG00000152229	PSTPIP2	Protein_Coding	Up-regulated	2.64256	5.11e-24
ENSG00000168077	SCARA3	Protein_Coding	Down-regulated	-3.31199	5.49e-24
ENSG00000159753	CARMIL2	Protein_Coding	Down-regulated	-3.52192	5.97e-24
ENSG00000160606	TLCD1	Protein_Coding	Up-regulated	2.55141	6.87e-24
ENSG00000120278	PLEKHG1	Protein_Coding	Up-regulated	6.90541	8.58e-24
ENSG00000137463	MGARP	Protein_Coding	Up-regulated	2.08072	9.22e-24
ENSG00000109881	CCDC34	Protein_Coding	Down-regulated	-2.43559	9.7e-24
ENSG00000164237	CMBL	Protein_Coding	Up-regulated	1.96395	1.2e-23
ENSG00000140534	TICRR	Protein_Coding	Down-regulated	-3.64513	1.25e-23
ENSG00000152137	HSPB8	Protein_Coding	Up-regulated	1.80482	1.44e-23
ENSG00000123473	STIL	Protein_Coding	Down-regulated	-2.98502	1.46e-23
ENSG00000157873	TNFRSF14	Protein_Coding	Up-regulated	2.5313	1.65e-23
ENSG00000156486	KCNS2	Protein_Coding	Up-regulated	3.38627	1.99e-23
ENSG00000135926	TMBIM1	Protein_Coding	Up-regulated	1.95298	2.18e-23
ENSG00000168394	TAP1	Protein_Coding	Up-regulated	2.22338	2.49e-23
ENSG00000196975	ANXA4	Protein_Coding	Up-regulated	1.76931	2.92e-23
ENSG00000116106	EPHA4	Protein_Coding	Up-regulated	2.00528	3.03e-23
ENSG00000168014	C2CD3	Protein_Coding	Up-regulated	2.13611	4.37e-23
ENSG00000148400	NOTCH1	Protein_Coding	Up-regulated	2.16853	5.26e-23
ENSG00000163071	SPATA18	Protein_Coding	Up-regulated	2.32313	6.46e-23
ENSG00000129195	PIMREG	Protein_Coding	Down-regulated	-3.33353	6.51e-23
ENSG00000100647	SUSD6	Protein_Coding	Up-regulated	2.06293	8.75e-23
ENSG00000143772	ITPKB	Protein_Coding	Up-regulated	2.19814	1.26e-22
ENSG00000087586	AURKA	Protein_Coding	Down-regulated	-2.4173	1.33e-22
ENSG00000137266	SLC22A23	Protein_Coding	Up-regulated	3.44149	1.35e-22
ENSG00000105327	BBC3	Protein_Coding	Up-regulated	2.37659	1.5e-22
ENSG00000132646	PCNA	Protein_Coding	Up-regulated	1.73937	1.59e-22
ENSG00000186193	SAPCD2	Protein_Coding	Down-regulated	-2.97678	1.59e-22
ENSG00000065328	MCM10	Protein_Coding	Down-regulated	-3.91694	1.72e-22
ENSG00000240891	PLCXD2	Protein_Coding	Up-regulated	2.89471	1.76e-22
ENSG00000123643	SLC36A1	Protein_Coding	Up-regulated	1.95698	1.87e-22
ENSG00000149547	EI24	Protein_Coding	Up-regulated	1.73876	2.06e-22
ENSG00000012048	BRCA1	Protein_Coding	Down-regulated	-2.75404	2.2e-22
ENSG00000102384	CENPI	Protein_Coding	Down-regulated	-3.03656	2.57e-22
ENSG00000177098	SCN4B	Protein_Coding	Up-regulated	6.88757	3e-22
ENSG00000187840	EIF4EBP1	Protein_Coding	Down-regulated	-2.01169	3.43e-22
ENSG00000115641	FHL2	Protein_Coding	Up-regulated	1.78358	3.78e-22
ENSG00000085999	RAD54L	Protein_Coding	Down-regulated	-4.11731	4.87e-22
ENSG00000132879	FBXO44	Protein_Coding	Up-regulated	1.97749	5.47e-22
ENSG00000196743	GM2A	Protein_Coding	Up-regulated	1.71322	5.61e-22
ENSG00000169607	CKAP2L	Protein_Coding	Down-regulated	-2.57024	5.81e-22
ENSG00000182541	LIMK2	Protein_Coding	Up-regulated	2.24748	7.37e-22
ENSG00000213722	DDAH2	Protein_Coding	Down-regulated	-2.207	7.4e-22
ENSG00000084693	AGBL5	Protein_Coding	Up-regulated	2.10959	9.34e-22
ENSG00000186815	TPCN1	Protein_Coding	Up-regulated	1.80443	9.51e-22
ENSG00000173805	HAP1	Protein_Coding	Up-regulated	3.82549	9.52e-22
ENSG00000090530	P3H2	Protein_Coding	Up-regulated	1.85892	9.91e-22
ENSG00000175274	TP53I11	Protein_Coding	Up-regulated	1.78368	1.35e-21
ENSG00000213853	EMP2	Protein_Coding	Down-regulated	-2.1406	1.43e-21
ENSG00000074527	NTN4	Protein_Coding	Up-regulated	1.99081	1.47e-21
ENSG00000167904	TMEM68	Protein_Coding	Up-regulated	2.08435	1.52e-21
ENSG00000182687	GALR2	Protein_Coding	Up-regulated	4.69706	1.91e-21
ENSG00000100867	DHRS2	Protein_Coding	Up-regulated	3.07238	2e-21
ENSG00000112029	FBXO5	Protein_Coding	Down-regulated	-3.41247	2.19e-21
ENSG00000138778	CENPE	Protein_Coding	Down-regulated	-4.648	2.22e-21
ENSG00000027869	SH2D2A	Protein_Coding	Up-regulated	5.49338	3.06e-21
ENSG00000187091	PLCD1	Protein_Coding	Up-regulated	2.18471	3.1e-21
ENSG00000270882	H4C14	Protein_Coding	Up-regulated	6.67134	3.27e-21
ENSG00000092621	PHGDH	Protein_Coding	Down-regulated	-1.9837	3.45e-21
ENSG00000211448	DIO2	Protein_Coding	Down-regulated	-2.1571	3.48e-21
ENSG00000173641	HSPB7	Protein_Coding	Down-regulated	-2.01614	3.88e-21
ENSG00000186994	KANK3	Protein_Coding	Up-regulated	5.19584	4.26e-21
ENSG00000143476	DTL	Protein_Coding	Down-regulated	-2.79622	5.44e-21
ENSG00000062822	POLD1	Protein_Coding	Down-regulated	-2.37827	5.66e-21
ENSG00000111725	PRKAB1	Protein_Coding	Up-regulated	1.87876	5.87e-21
ENSG00000116514	RNF19B	Protein_Coding	Up-regulated	2.22134	6.29e-21
ENSG00000143028	SYPL2	Protein_Coding	Up-regulated	1.85125	6.7e-21
ENSG00000141905	NFIC	Protein_Coding	Down-regulated	-1.7822	6.88e-21
ENSG00000079308	TNS1	Protein_Coding	Down-regulated	-1.74082	7.66e-21
ENSG00000104419	NDRG1	Protein_Coding	Up-regulated	1.67021	7.71e-21
ENSG00000024526	DEPDC1	Protein_Coding	Down-regulated	-4.07905	7.78e-21
ENSG00000129474	AJUBA	Protein_Coding	Up-regulated	1.87153	7.91e-21
ENSG00000232774	LINC03033	lncRNA	Up-regulated	4.00344	8.89e-21
ENSG00000214357	NEURL1B	Protein_Coding	Down-regulated	-2.86944	9.05e-21
ENSG00000170836	PPM1D	Protein_Coding	Up-regulated	2.02553	9.17e-21
ENSG00000095383	TBC1D2	Protein_Coding	Up-regulated	1.93518	1.5e-20
ENSG00000149809	TM7SF2	Protein_Coding	Up-regulated	2.34199	1.85e-20
ENSG00000224592	MIR3659HG	lncRNA	Up-regulated	8.85996	1.92e-20
ENSG00000167552	TUBA1A	Protein_Coding	Down-regulated	-1.63559	1.93e-20
ENSG00000107099	DOCK8	Protein_Coding	Up-regulated	3.37076	1.95e-20
ENSG00000010030	ETV7	Protein_Coding	Up-regulated	3.13951	2.22e-20
ENSG00000173846	PLK3	Protein_Coding	Up-regulated	2.12605	2.31e-20
ENSG00000101230	ISM1	Protein_Coding	Up-regulated	4.12126	2.35e-20
ENSG00000136695	IL36RN	Protein_Coding	Up-regulated	4.19225	2.43e-20
ENSG00000140443	IGF1R	Protein_Coding	Up-regulated	1.67047	3.08e-20
ENSG00000175567	UCP2	Protein_Coding	Up-regulated	1.78588	3.08e-20
ENSG00000198826	ARHGAP11A	Protein_Coding	Down-regulated	-2.92974	3.17e-20
ENSG00000147573	TRIM55	Protein_Coding	Up-regulated	2.08194	3.44e-20
ENSG00000118193	KIF14	Protein_Coding	Down-regulated	-3.71279	4.37e-20
ENSG00000151725	CENPU	Protein_Coding	Down-regulated	-2.68293	4.41e-20
ENSG00000165406	MARCHF8	Protein_Coding	Up-regulated	1.95585	4.41e-20
ENSG00000124067	SLC12A4	Protein_Coding	Up-regulated	1.99573	5.61e-20
ENSG00000160917	CPSF4	Protein_Coding	Up-regulated	2.06352	5.72e-20
ENSG00000198722	UNC13B	Protein_Coding	Up-regulated	1.77923	6.2e-20
ENSG00000108384	RAD51C	Protein_Coding	Up-regulated	1.87292	7.44e-20
ENSG00000071282	LMCD1	Protein_Coding	Up-regulated	1.71917	8.06e-20
ENSG00000138356	AOX1	Protein_Coding	Up-regulated	2.29276	8.06e-20
ENSG00000167553	TUBA1C	Protein_Coding	Down-regulated	-1.64327	8.48e-20
ENSG00000196152	ZNF79	Protein_Coding	Up-regulated	2.29193	8.87e-20
ENSG00000173391	OLR1	Protein_Coding	Up-regulated	2.08834	9.33e-20
ENSG00000164236	ANKRD33B	Protein_Coding	Up-regulated	2.54286	1.16e-19
ENSG00000196230	TUBB	Protein_Coding	Down-regulated	-1.96921	1.16e-19
ENSG00000134574	DDB2	Protein_Coding	Up-regulated	1.75544	1.24e-19
ENSG00000136859	ANGPTL2	Protein_Coding	Up-regulated	1.6496	1.33e-19
ENSG00000183153	GJD3	Protein_Coding	Up-regulated	2.58645	1.69e-19
ENSG00000167196	FBXO22	Protein_Coding	Up-regulated	1.752	1.73e-19
ENSG00000171444	MCC	Protein_Coding	Up-regulated	2.3701	1.84e-19
ENSG00000197971	MBP	Protein_Coding	Up-regulated	5.7958	2.05e-19
ENSG00000145934	TENM2	Protein_Coding	Down-regulated	-3.37064	2.14e-19
ENSG00000146918	NCAPG2	Protein_Coding	Down-regulated	-2.27755	2.23e-19
ENSG00000171469	ZNF561	Protein_Coding	Up-regulated	1.92412	4.96e-19
ENSG00000125965	GDF5	Protein_Coding	Up-regulated	3.09687	5.36e-19
ENSG00000188153	COL4A5	Protein_Coding	Up-regulated	3.00098	6.03e-19
ENSG00000173156	RHOD	Protein_Coding	Up-regulated	1.7952	6.51e-19
ENSG00000104435	STMN2	Protein_Coding	Down-regulated	-1.66548	7.96e-19
ENSG00000065357	DGKA	Protein_Coding	Up-regulated	1.60433	8.46e-19
ENSG00000135677	GNS	Protein_Coding	Up-regulated	1.58272	9.29e-19
ENSG00000259424	IRAIN	lncRNA	Up-regulated	5.75735	9.91e-19
ENSG00000131470	PSMC3IP	Protein_Coding	Down-regulated	-2.27221	1.05e-18
ENSG00000197299	BLM	Protein_Coding	Down-regulated	-3.84772	1.06e-18
ENSG00000184371	CSF1	Protein_Coding	Up-regulated	1.67027	1.29e-18
ENSG00000198056	PRIM1	Protein_Coding	Down-regulated	-4.25012	1.32e-18
ENSG00000159212	CLIC6	Protein_Coding	Up-regulated	3.42193	1.37e-18
ENSG00000103742	IGDCC4	Protein_Coding	Up-regulated	3.32915	1.5e-18
ENSG00000124762	CDKN1A	Protein_Coding	Up-regulated	2.08821	1.74e-18
ENSG00000172403	SYNPO2	Protein_Coding	Down-regulated	-1.91733	1.79e-18
ENSG00000070961	ATP2B1	Protein_Coding	Down-regulated	-1.75977	1.87e-18
ENSG00000187714	SLC18A3	Protein_Coding	Up-regulated	8.69336	1.92e-18
ENSG00000094916	CBX5	Protein_Coding	Down-regulated	-1.61612	1.96e-18
ENSG00000131979	GCH1	Protein_Coding	Up-regulated	4.31257	2.02e-18
ENSG00000170734	POLH	Protein_Coding	Up-regulated	1.6328	2.03e-18
ENSG00000148541	FAM13C	Protein_Coding	Up-regulated	8.68133	2.14e-18
ENSG00000102996	MMP15	Protein_Coding	Up-regulated	2.18831	2.16e-18
ENSG00000229950	TFAP2A-AS1	lncRNA	Up-regulated	2.55347	3.07e-18
ENSG00000100065	CARD10	Protein_Coding	Up-regulated	2.53752	3.25e-18
ENSG00000182704	TSKU	Protein_Coding	Up-regulated	2.02634	3.31e-18
ENSG00000130787	HIP1R	Protein_Coding	Up-regulated	2.24128	3.5e-18
ENSG00000134504	KCTD1	Protein_Coding	Up-regulated	1.83798	3.55e-18
ENSG00000100714	MTHFD1	Protein_Coding	Down-regulated	-1.67903	3.61e-18
ENSG00000107187	LHX3	Protein_Coding	Up-regulated	8.70836	4.07e-18
ENSG00000142623	PADI1	Protein_Coding	Up-regulated	3.49037	4.38e-18
ENSG00000183943	PRKX	Protein_Coding	Up-regulated	1.77995	4.61e-18
ENSG00000125845	BMP2	Protein_Coding	Up-regulated	2.18269	4.74e-18
ENSG00000289194	ENSG00000289194	lncRNA	Down-regulated	-2.98767	5.53e-18
ENSG00000164050	PLXNB1	Protein_Coding	Up-regulated	1.98374	6.1e-18
ENSG00000152782	PANK1	Protein_Coding	Up-regulated	2.69095	6.87e-18
ENSG00000131080	EDA2R	Protein_Coding	Up-regulated	1.73235	7.02e-18
ENSG00000103495	MAZ	Protein_Coding	Down-regulated	-1.6811	7.82e-18
ENSG00000133619	KRBA1	Protein_Coding	Up-regulated	2.04728	7.86e-18
ENSG00000067082	KLF6	Protein_Coding	Down-regulated	-1.56748	8.35e-18
ENSG00000223865	HLA-DPB1	Protein_Coding	Down-regulated	-2.46484	8.84e-18
ENSG00000184363	PKP3	Protein_Coding	Down-regulated	-5.04757	9.14e-18
ENSG00000117115	PADI2	Protein_Coding	Up-regulated	3.81202	1.08e-17
ENSG00000136003	ISCU	Protein_Coding	Up-regulated	1.55201	1.08e-17
ENSG00000145882	PCYOX1L	Protein_Coding	Up-regulated	2.02825	1.08e-17
ENSG00000154822	PLCL2	Protein_Coding	Up-regulated	2.61669	1.1e-17
ENSG00000106992	AK1	Protein_Coding	Up-regulated	1.71974	1.19e-17
ENSG00000101144	BMP7	Protein_Coding	Up-regulated	4.64677	1.25e-17
ENSG00000111452	ADGRD1	Protein_Coding	Up-regulated	2.50975	1.28e-17
ENSG00000063660	GPC1	Protein_Coding	Up-regulated	1.96979	1.32e-17
ENSG00000113810	SMC4	Protein_Coding	Down-regulated	-2.4881	1.37e-17
ENSG00000288873	ENSG00000288873	lncRNA	Up-regulated	2.67034	1.54e-17
ENSG00000166619	BLCAP	Protein_Coding	Up-regulated	1.62731	1.56e-17
ENSG00000265962	GACAT2	lncRNA	Up-regulated	2.51917	1.59e-17
ENSG00000291189	ENSG00000291189	lncRNA	Up-regulated	6.56194	1.64e-17
ENSG00000153914	SREK1	Protein_Coding	Down-regulated	-1.94976	1.73e-17
ENSG00000170425	ADORA2B	Protein_Coding	Up-regulated	2.43987	2.02e-17
ENSG00000166130	IKBIP	Protein_Coding	Up-regulated	1.79443	2.05e-17
ENSG00000110492	MDK	Protein_Coding	Up-regulated	1.6922	2.54e-17
ENSG00000076604	TRAF4	Protein_Coding	Up-regulated	1.86279	2.63e-17
ENSG00000152642	GPD1L	Protein_Coding	Up-regulated	2.31532	2.99e-17
ENSG00000130164	LDLR	Protein_Coding	Down-regulated	-2.25769	3.9e-17
ENSG00000112742	TTK	Protein_Coding	Down-regulated	-4.01069	4.28e-17
ENSG00000081087	OSTM1	Protein_Coding	Up-regulated	1.86135	4.51e-17
ENSG00000127528	KLF2	Protein_Coding	Down-regulated	-2.09664	5.11e-17
ENSG00000130600	H19	lncRNA	Up-regulated	3.53587	5.25e-17
ENSG00000185634	SHC4	Protein_Coding	Up-regulated	2.33114	5.66e-17
ENSG00000253368	TRNP1	Protein_Coding	Down-regulated	-1.50077	5.72e-17
ENSG00000109674	NEIL3	Protein_Coding	Down-regulated	-3.90462	7.15e-17
ENSG00000110171	TRIM3	Protein_Coding	Up-regulated	1.94034	7.28e-17
ENSG00000215012	RTL10	Protein_Coding	Up-regulated	1.61575	7.48e-17
ENSG00000280744	LINC01173	lncRNA	Up-regulated	8.5217	7.48e-17
ENSG00000110375	UPK2	Protein_Coding	Up-regulated	3.68294	8.3e-17
ENSG00000277224	H2BC7	Protein_Coding	Up-regulated	4.65756	8.88e-17
ENSG00000187479	C11orf96	Protein_Coding	Up-regulated	2.93642	1.09e-16
ENSG00000100399	CHADL	Protein_Coding	Up-regulated	3.09081	1.14e-16
ENSG00000130766	SESN2	Protein_Coding	Up-regulated	1.76081	1.19e-16
ENSG00000132718	SYT11	Protein_Coding	Up-regulated	1.76365	1.5e-16
ENSG00000144677	CTDSPL	Protein_Coding	Down-regulated	-1.71682	1.57e-16
ENSG00000148357	HMCN2	Protein_Coding	Up-regulated	5.144	1.68e-16
ENSG00000136114	THSD1	Protein_Coding	Up-regulated	3.07159	1.83e-16
ENSG00000162645	GBP2	Protein_Coding	Down-regulated	-2.10127	1.95e-16
ENSG00000168615	ADAM9	Protein_Coding	Up-regulated	1.63506	2.11e-16
ENSG00000136938	ANP32B	Protein_Coding	Down-regulated	-1.75067	2.23e-16
ENSG00000136867	SLC31A2	Protein_Coding	Up-regulated	2.13355	2.28e-16
ENSG00000100889	PCK2	Protein_Coding	Down-regulated	-1.87927	2.29e-16
ENSG00000162073	PAQR4	Protein_Coding	Down-regulated	-2.45001	2.87e-16
ENSG00000170464	DNAJC18	Protein_Coding	Up-regulated	2.01965	2.95e-16
ENSG00000111077	TNS2	Protein_Coding	Down-regulated	-2.03435	3.04e-16
ENSG00000149557	FEZ1	Protein_Coding	Up-regulated	1.71662	3.28e-16
ENSG00000073060	SCARB1	Protein_Coding	Up-regulated	1.71358	3.55e-16
ENSG00000181218	H2AC25	Protein_Coding	Up-regulated	2.11735	4.4e-16
ENSG00000146247	PHIP	Protein_Coding	Down-regulated	-1.98525	5.56e-16
ENSG00000109685	NSD2	Protein_Coding	Down-regulated	-1.58728	6.65e-16
ENSG00000101670	LIPG	Protein_Coding	Up-regulated	3.23451	6.8e-16
ENSG00000124145	SDC4	Protein_Coding	Up-regulated	1.42806	6.8e-16
ENSG00000101782	RIOK3	Protein_Coding	Up-regulated	1.64894	6.98e-16
ENSG00000182612	TSPAN10	Protein_Coding	Up-regulated	2.21497	7.22e-16
ENSG00000104368	PLAT	Protein_Coding	Up-regulated	1.54595	7.26e-16
ENSG00000159259	CHAF1B	Protein_Coding	Down-regulated	-2.05929	7.47e-16
ENSG00000103175	WFDC1	Protein_Coding	Down-regulated	-1.78486	7.49e-16
ENSG00000105290	APLP1	Protein_Coding	Up-regulated	1.70646	8.08e-16
ENSG00000184661	CDCA2	Protein_Coding	Down-regulated	-2.27691	8.25e-16
ENSG00000012822	CALCOCO1	Protein_Coding	Up-regulated	1.46449	8.79e-16
ENSG00000137216	TMEM63B	Protein_Coding	Up-regulated	1.50653	9.13e-16
ENSG00000221829	FANCG	Protein_Coding	Down-regulated	-2.25412	9.33e-16
ENSG00000259330	INAFM2	Protein_Coding	Up-regulated	1.58541	9.62e-16
ENSG00000099889	ARVCF	Protein_Coding	Up-regulated	2.79609	1.21e-15
ENSG00000186638	KIF24	Protein_Coding	Down-regulated	-2.85787	1.22e-15
ENSG00000100678	SLC8A3	Protein_Coding	Up-regulated	3.61067	1.25e-15
ENSG00000179148	ALOXE3	Protein_Coding	Up-regulated	4.28118	1.55e-15
ENSG00000235750	KIAA0040	Protein_Coding	Up-regulated	1.86323	1.74e-15
ENSG00000225968	ELFN1	Protein_Coding	Up-regulated	2.17233	1.84e-15
ENSG00000115415	STAT1	Protein_Coding	Up-regulated	1.65049	1.9e-15
ENSG00000147408	CSGALNACT1	Protein_Coding	Up-regulated	2.9304	1.95e-15
ENSG00000147509	RGS20	Protein_Coding	Up-regulated	2.85947	1.99e-15
ENSG00000197530	MIB2	Protein_Coding	Up-regulated	1.72332	1.99e-15
ENSG00000115758	ODC1	Protein_Coding	Up-regulated	1.53035	2.1e-15
ENSG00000076706	MCAM	Protein_Coding	Down-regulated	-1.76924	2.19e-15
ENSG00000166801	FAM111A	Protein_Coding	Down-regulated	-1.9906	2.29e-15
ENSG00000173575	CHD2	Protein_Coding	Down-regulated	-1.57284	2.46e-15
ENSG00000153044	CENPH	Protein_Coding	Down-regulated	-2.3897	2.47e-15
ENSG00000147475	ERLIN2	Protein_Coding	Up-regulated	1.56192	2.54e-15
ENSG00000148175	STOM	Protein_Coding	Up-regulated	1.4653	2.65e-15
ENSG00000100600	LGMN	Protein_Coding	Up-regulated	1.41515	3.14e-15
ENSG00000260641	TSPAN5-DT	lncRNA	Up-regulated	3.80046	3.15e-15
ENSG00000114268	PFKFB4	Protein_Coding	Up-regulated	2.03932	3.21e-15
ENSG00000167670	CHAF1A	Protein_Coding	Down-regulated	-1.70731	3.46e-15
ENSG00000196337	CGB7	Protein_Coding	Up-regulated	5.01469	3.71e-15
ENSG00000122877	EGR2	Protein_Coding	Up-regulated	2.37807	4.11e-15
ENSG00000131669	NINJ1	Protein_Coding	Up-regulated	1.51842	4.14e-15
ENSG00000136826	KLF4	Protein_Coding	Up-regulated	2.06761	4.88e-15
ENSG00000164109	MAD2L1	Protein_Coding	Down-regulated	-2.54446	5.2e-15
ENSG00000172020	GAP43	Protein_Coding	Down-regulated	-2.39444	5.4e-15
ENSG00000106105	GARS1	Protein_Coding	Down-regulated	-1.46265	5.74e-15
ENSG00000184992	BRI3BP	Protein_Coding	Down-regulated	-1.91542	6.76e-15
ENSG00000161011	SQSTM1	Protein_Coding	Up-regulated	1.77441	7.1e-15
ENSG00000280721	LINC01943	lncRNA	Up-regulated	2.68026	7.24e-15
ENSG00000198743	SLC5A3	Protein_Coding	Up-regulated	1.83245	7.39e-15
ENSG00000129680	MAP7D3	Protein_Coding	Down-regulated	-1.65065	8.16e-15
ENSG00000123737	EXOSC9	Protein_Coding	Down-regulated	-1.71275	8.68e-15
ENSG00000124795	DEK	Protein_Coding	Down-regulated	-1.86819	9.22e-15
ENSG00000143575	HAX1	Protein_Coding	Down-regulated	-1.41213	9.75e-15
ENSG00000204592	HLA-E	Protein_Coding	Up-regulated	1.51234	1.11e-14
ENSG00000268621	IGFL2-AS1	lncRNA	Up-regulated	8.30639	1.13e-14
ENSG00000121621	KIF18A	Protein_Coding	Down-regulated	-3.296	1.25e-14
ENSG00000136235	GPNMB	Protein_Coding	Up-regulated	1.42521	1.31e-14
ENSG00000204580	DDR1	Protein_Coding	Up-regulated	1.63278	1.35e-14
ENSG00000183287	CCBE1	Protein_Coding	Down-regulated	-1.80326	1.36e-14
ENSG00000163882	POLR2H	Protein_Coding	Up-regulated	1.64366	1.37e-14
ENSG00000073756	PTGS2	Protein_Coding	Down-regulated	-1.7778	1.44e-14
ENSG00000070159	PTPN3	Protein_Coding	Up-regulated	2.90248	1.49e-14
ENSG00000175305	CCNE2	Protein_Coding	Down-regulated	-4.17631	1.71e-14
ENSG00000011332	DPF1	Protein_Coding	Down-regulated	-2.76758	1.73e-14
ENSG00000090539	CHRD	Protein_Coding	Up-regulated	2.82827	1.78e-14
ENSG00000266208	GJD3-AS1	lncRNA	Up-regulated	1.87119	1.91e-14
ENSG00000117280	RAB29	Protein_Coding	Up-regulated	1.72096	1.98e-14
ENSG00000114166	KAT2B	Protein_Coding	Up-regulated	1.87955	2.39e-14
ENSG00000127663	KDM4B	Protein_Coding	Up-regulated	1.69315	2.48e-14
ENSG00000204936	CD177	Protein_Coding	Up-regulated	3.03263	2.7e-14
ENSG00000176531	PHLDB3	Protein_Coding	Up-regulated	1.8683	2.93e-14
ENSG00000179750	APOBEC3B	Protein_Coding	Down-regulated	-1.99024	3.27e-14
ENSG00000145012	LPP	Protein_Coding	Down-regulated	-1.5754	3.35e-14
ENSG00000096696	DSP	Protein_Coding	Up-regulated	1.36672	3.38e-14
ENSG00000178695	KCTD12	Protein_Coding	Up-regulated	2.13451	3.42e-14
ENSG00000143479	DYRK3	Protein_Coding	Up-regulated	1.50385	3.5e-14
ENSG00000254453	NAV2-AS2	lncRNA	Up-regulated	4.41266	3.73e-14
ENSG00000054654	SYNE2	Protein_Coding	Down-regulated	-2.41909	4.01e-14
ENSG00000198805	PNP	Protein_Coding	Up-regulated	1.53653	4.26e-14
ENSG00000249992	TMEM158	Protein_Coding	Up-regulated	1.51343	4.47e-14
ENSG00000117335	CD46	Protein_Coding	Up-regulated	1.72611	4.55e-14
ENSG00000173207	CKS1B	Protein_Coding	Down-regulated	-1.85854	4.59e-14
ENSG00000147883	CDKN2B	Protein_Coding	Up-regulated	2.46781	5.71e-14
ENSG00000198729	PPP1R14C	Protein_Coding	Up-regulated	2.87865	5.81e-14
ENSG00000162981	LRATD1	Protein_Coding	Up-regulated	5.49457	5.84e-14
ENSG00000108106	UBE2S	Protein_Coding	Down-regulated	-1.67118	5.85e-14
ENSG00000113231	PDE8B	Protein_Coding	Down-regulated	-2.67558	5.89e-14
ENSG00000091651	ORC6	Protein_Coding	Down-regulated	-2.37074	6.54e-14
ENSG00000145632	PLK2	Protein_Coding	Up-regulated	1.42413	6.7e-14
ENSG00000143819	EPHX1	Protein_Coding	Up-regulated	1.40622	6.81e-14
ENSG00000128965	CHAC1	Protein_Coding	Down-regulated	-1.68696	7.7e-14
ENSG00000181192	DHTKD1	Protein_Coding	Down-regulated	-1.85405	8.13e-14
ENSG00000165804	ZNF219	Protein_Coding	Up-regulated	1.6596	8.19e-14
ENSG00000171320	ESCO2	Protein_Coding	Down-regulated	-3.82145	8.21e-14
ENSG00000140284	SLC27A2	Protein_Coding	Up-regulated	2.84803	8.47e-14
ENSG00000136542	GALNT5	Protein_Coding	Up-regulated	1.49083	8.53e-14
ENSG00000137880	GCHFR	Protein_Coding	Up-regulated	2.20135	8.94e-14
ENSG00000291237	SOD2	Protein_Coding	Up-regulated	1.37002	9.4e-14
ENSG00000138376	BARD1	Protein_Coding	Down-regulated	-3.00072	9.76e-14
ENSG00000197415	VEPH1	Protein_Coding	Down-regulated	-2.51584	1.08e-13
ENSG00000175600	SUGCT	Protein_Coding	Up-regulated	1.63951	1.12e-13
ENSG00000090013	BLVRB	Protein_Coding	Up-regulated	1.58954	1.14e-13
ENSG00000007968	E2F2	Protein_Coding	Down-regulated	-3.68626	1.25e-13
ENSG00000150995	ITPR1	Protein_Coding	Up-regulated	2.78696	1.3e-13
ENSG00000183615	FAM167B	Protein_Coding	Down-regulated	-3.07743	1.41e-13
ENSG00000100036	SLC35E4	Protein_Coding	Up-regulated	1.82557	1.45e-13
ENSG00000119969	HELLS	Protein_Coding	Down-regulated	-2.17506	1.45e-13
ENSG00000132840	BHMT2	Protein_Coding	Up-regulated	1.7304	1.48e-13
ENSG00000129566	TEP1	Protein_Coding	Up-regulated	1.70471	1.49e-13
ENSG00000035499	DEPDC1B	Protein_Coding	Down-regulated	-3.46402	1.53e-13
ENSG00000120699	EXOSC8	Protein_Coding	Down-regulated	-1.7235	1.63e-13
ENSG00000111642	CHD4	Protein_Coding	Down-regulated	-1.53829	1.85e-13
ENSG00000017427	IGF1	Protein_Coding	Down-regulated	-3.38931	1.89e-13
ENSG00000146707	POMZP3	Protein_Coding	Up-regulated	1.91803	1.89e-13
ENSG00000048740	CELF2	Protein_Coding	Up-regulated	2.56473	1.91e-13
ENSG00000108439	PNPO	Protein_Coding	Up-regulated	1.47196	1.91e-13
ENSG00000169067	ACTBL2	Protein_Coding	Up-regulated	6.02979	2.05e-13
ENSG00000185614	INKA1	Protein_Coding	Up-regulated	2.33422	2.05e-13
ENSG00000147044	CASK	Protein_Coding	Up-regulated	1.54492	2.31e-13
ENSG00000186642	PDE2A	Protein_Coding	Up-regulated	4.12216	2.36e-13
ENSG00000080823	MOK	Protein_Coding	Down-regulated	-2.28718	2.47e-13
ENSG00000111602	TIMELESS	Protein_Coding	Down-regulated	-1.67864	2.52e-13
ENSG00000257953	ENSG00000257953	lncRNA	Up-regulated	5.22342	2.57e-13
ENSG00000154734	ADAMTS1	Protein_Coding	Down-regulated	-1.30292	2.74e-13
ENSG00000125885	MCM8	Protein_Coding	Down-regulated	-2.55559	2.89e-13
ENSG00000266680	ENSG00000266680	lncRNA	Up-regulated	2.52253	2.96e-13
ENSG00000178607	ERN1	Protein_Coding	Up-regulated	1.91517	3e-13
ENSG00000183770	FOXL2	Protein_Coding	Up-regulated	2.04511	3.04e-13
ENSG00000174775	HRAS	Protein_Coding	Up-regulated	1.50303	3.08e-13
ENSG00000134668	SPOCD1	Protein_Coding	Down-regulated	-1.46239	3.43e-13
ENSG00000287750	LINC03026	lncRNA	Up-regulated	2.81756	3.48e-13
ENSG00000120738	EGR1	Protein_Coding	Up-regulated	1.47698	3.66e-13
ENSG00000139168	ZCRB1	Protein_Coding	Down-regulated	-1.74183	3.71e-13
ENSG00000177084	POLE	Protein_Coding	Down-regulated	-1.80515	3.88e-13
ENSG00000186318	BACE1	Protein_Coding	Up-regulated	1.32089	4.72e-13
ENSG00000142627	EPHA2	Protein_Coding	Up-regulated	1.42267	4.89e-13
ENSG00000167767	KRT80	Protein_Coding	Down-regulated	-2.06297	4.89e-13
ENSG00000189403	HMGB1	Protein_Coding	Down-regulated	-1.3416	5.26e-13
ENSG00000174807	CD248	Protein_Coding	Down-regulated	-1.39472	5.55e-13
ENSG00000164985	PSIP1	Protein_Coding	Down-regulated	-1.79139	5.63e-13
ENSG00000162783	IER5	Protein_Coding	Up-regulated	1.413	5.73e-13
ENSG00000285244	DINOL	lncRNA	Up-regulated	8.1028	5.78e-13
ENSG00000151131	NOPCHAP1	Protein_Coding	Up-regulated	1.75879	6.49e-13
ENSG00000155252	PI4K2A	Protein_Coding	Up-regulated	1.46923	6.87e-13
ENSG00000181026	AEN	Protein_Coding	Up-regulated	1.43045	6.9e-13
ENSG00000111057	KRT18	Protein_Coding	Down-regulated	-1.63702	7.03e-13
ENSG00000169683	LRRC45	Protein_Coding	Down-regulated	-1.75096	7.24e-13
ENSG00000159055	MIS18A	Protein_Coding	Down-regulated	-1.89584	7.39e-13
ENSG00000136048	DRAM1	Protein_Coding	Up-regulated	1.28922	7.42e-13
ENSG00000176490	DIRAS1	Protein_Coding	Down-regulated	-2.621	7.56e-13
ENSG00000164300	SERINC5	Protein_Coding	Up-regulated	1.57927	7.74e-13
ENSG00000103145	HCFC1R1	Protein_Coding	Up-regulated	1.32018	8.19e-13
ENSG00000161921	CXCL16	Protein_Coding	Up-regulated	2.50499	8.4e-13
ENSG00000165072	MAMDC2	Protein_Coding	Up-regulated	2.08942	8.42e-13
ENSG00000127329	PTPRB	Protein_Coding	Up-regulated	2.33814	8.82e-13
ENSG00000107959	PITRM1	Protein_Coding	Up-regulated	1.32489	8.89e-13
ENSG00000136122	BORA	Protein_Coding	Down-regulated	-2.80849	8.96e-13
ENSG00000124216	SNAI1	Protein_Coding	Down-regulated	-2.15785	9.93e-13
ENSG00000196628	TCF4	Protein_Coding	Down-regulated	-1.43209	1.1e-12
ENSG00000170430	MGMT	Protein_Coding	Down-regulated	-1.785	1.12e-12
ENSG00000188706	ZDHHC9	Protein_Coding	Up-regulated	1.31421	1.12e-12
ENSG00000213186	TRIM59	Protein_Coding	Down-regulated	-1.97416	1.12e-12
ENSG00000204682	MIR1915HG	lncRNA	Up-regulated	2.09523	1.14e-12
ENSG00000108848	LUC7L3	Protein_Coding	Down-regulated	-1.42344	1.17e-12
ENSG00000149636	DSN1	Protein_Coding	Down-regulated	-1.81718	1.18e-12
ENSG00000166578	IQCD	Protein_Coding	Up-regulated	2.44695	1.22e-12
ENSG00000153094	BCL2L11	Protein_Coding	Up-regulated	2.24977	1.24e-12
ENSG00000153048	CARHSP1	Protein_Coding	Down-regulated	-1.58633	1.27e-12
ENSG00000108950	FAM20A	Protein_Coding	Up-regulated	2.04576	1.43e-12
ENSG00000169994	MYO7B	Protein_Coding	Down-regulated	-2.3215	1.43e-12
ENSG00000168386	FILIP1L	Protein_Coding	Down-regulated	-1.66016	1.47e-12
ENSG00000166004	CEP295	Protein_Coding	Down-regulated	-2.5693	1.49e-12
ENSG00000142583	SLC2A5	Protein_Coding	Up-regulated	5.22615	1.55e-12
ENSG00000101945	SUV39H1	Protein_Coding	Down-regulated	-2.08582	1.59e-12
ENSG00000108688	CCL7	Protein_Coding	Up-regulated	2.9119	1.7e-12
ENSG00000170624	SGCD	Protein_Coding	Down-regulated	-2.20203	1.7e-12
ENSG00000117525	F3	Protein_Coding	Up-regulated	1.32325	1.95e-12
ENSG00000267374	MIR924HG	lncRNA	Down-regulated	-4.75359	1.96e-12
ENSG00000179820	MYADM	Protein_Coding	Down-regulated	-1.37352	2.04e-12
ENSG00000257219	LNCOG	lncRNA	Up-regulated	2.21664	2.09e-12
ENSG00000114948	ADAM23	Protein_Coding	Up-regulated	2.05215	2.18e-12
ENSG00000013588	GPRC5A	Protein_Coding	Up-regulated	1.24991	2.3e-12
ENSG00000177551	NHLH2	Protein_Coding	Up-regulated	8.11933	2.3e-12
ENSG00000213551	DNAJC9	Protein_Coding	Down-regulated	-1.53098	2.49e-12
ENSG00000171877	FRMD5	Protein_Coding	Up-regulated	2.29789	2.58e-12
ENSG00000147813	NAPRT	Protein_Coding	Down-regulated	-2.85445	2.63e-12
ENSG00000129173	E2F8	Protein_Coding	Down-regulated	-3.53938	2.64e-12
ENSG00000120802	TMPO	Protein_Coding	Down-regulated	-1.50392	2.87e-12
ENSG00000160957	RECQL4	Protein_Coding	Down-regulated	-2.08428	2.87e-12
ENSG00000172794	RAB37	Protein_Coding	Up-regulated	5.13647	2.93e-12
ENSG00000086544	ITPKC	Protein_Coding	Up-regulated	1.7037	2.96e-12
ENSG00000136824	SMC2	Protein_Coding	Down-regulated	-1.86846	3.07e-12
ENSG00000168268	NT5DC2	Protein_Coding	Down-regulated	-1.4069	3.2e-12
ENSG00000108947	EFNB3	Protein_Coding	Down-regulated	-3.35417	3.23e-12
ENSG00000049541	RFC2	Protein_Coding	Down-regulated	-1.56133	3.31e-12
ENSG00000075131	TIPIN	Protein_Coding	Down-regulated	-2.19714	3.56e-12
ENSG00000112118	MCM3	Protein_Coding	Down-regulated	-1.38395	3.99e-12
ENSG00000196313	POM121	Protein_Coding	Up-regulated	1.49563	4e-12
ENSG00000107738	VSIR	Protein_Coding	Up-regulated	1.57231	4.39e-12
ENSG00000164877	MICALL2	Protein_Coding	Up-regulated	1.85445	4.72e-12
ENSG00000135823	STX6	Protein_Coding	Up-regulated	1.45011	4.81e-12
ENSG00000165891	E2F7	Protein_Coding	Up-regulated	1.53338	4.89e-12
ENSG00000117152	RGS4	Protein_Coding	Down-regulated	-2.10964	5.16e-12
ENSG00000162614	NEXN	Protein_Coding	Down-regulated	-1.8424	5.49e-12
ENSG00000139618	BRCA2	Protein_Coding	Down-regulated	-2.68961	5.55e-12
ENSG00000170027	YWHAG	Protein_Coding	Up-regulated	1.25738	5.61e-12
ENSG00000105655	ISYNA1	Protein_Coding	Up-regulated	1.52166	5.64e-12
ENSG00000149218	ENDOD1	Protein_Coding	Up-regulated	1.42389	6.05e-12
ENSG00000101868	POLA1	Protein_Coding	Down-regulated	-1.84103	6.25e-12
ENSG00000008853	RHOBTB2	Protein_Coding	Down-regulated	-1.77791	6.7e-12
ENSG00000271926	ENSG00000271926	lncRNA	Up-regulated	4.34402	6.83e-12
ENSG00000106123	EPHB6	Protein_Coding	Up-regulated	2.18997	6.86e-12
ENSG00000213654	GPSM3	Protein_Coding	Down-regulated	-1.86648	7.45e-12
ENSG00000105371	ICAM4	Protein_Coding	Up-regulated	2.62327	7.69e-12
ENSG00000163545	NUAK2	Protein_Coding	Up-regulated	1.63544	7.79e-12
ENSG00000169105	CHST14	Protein_Coding	Up-regulated	1.31348	7.96e-12
ENSG00000168496	FEN1	Protein_Coding	Down-regulated	-1.43392	8.03e-12
ENSG00000135778	NTPCR	Protein_Coding	Up-regulated	1.43251	8.44e-12
ENSG00000101000	PROCR	Protein_Coding	Up-regulated	1.54446	9.13e-12
ENSG00000272081	FCHO2-DT	lncRNA	Up-regulated	3.10718	9.49e-12
ENSG00000255197	ENSG00000255197	lncRNA	Up-regulated	2.48358	9.99e-12
ENSG00000153250	RBMS1	Protein_Coding	Down-regulated	-1.43485	1.02e-11
ENSG00000051341	POLQ	Protein_Coding	Down-regulated	-3.25342	1.05e-11
ENSG00000100154	TTC28	Protein_Coding	Down-regulated	-1.6055	1.07e-11
ENSG00000005059	MCUB	Protein_Coding	Down-regulated	-2.23658	1.08e-11
ENSG00000176974	SHMT1	Protein_Coding	Down-regulated	-1.67676	1.09e-11
ENSG00000134109	EDEM1	Protein_Coding	Up-regulated	1.37916	1.18e-11
ENSG00000160345	PIERCE1	Protein_Coding	Down-regulated	-3.09041	1.2e-11
ENSG00000080839	RBL1	Protein_Coding	Down-regulated	-2.0527	1.21e-11
ENSG00000173918	C1QTNF1	Protein_Coding	Up-regulated	1.43438	1.49e-11
ENSG00000000460	C1orf112	Protein_Coding	Down-regulated	-2.25025	1.54e-11
ENSG00000170855	TRIAP1	Protein_Coding	Up-regulated	1.35768	1.58e-11
ENSG00000184445	KNTC1	Protein_Coding	Down-regulated	-2.17966	1.59e-11
ENSG00000028277	POU2F2	Protein_Coding	Down-regulated	-1.45711	1.61e-11
ENSG00000121552	CSTA	Protein_Coding	Up-regulated	5.72825	1.65e-11
ENSG00000048392	RRM2B	Protein_Coding	Up-regulated	1.8595	1.71e-11
ENSG00000008441	NFIX	Protein_Coding	Down-regulated	-1.27072	1.78e-11
ENSG00000075461	CACNG4	Protein_Coding	Down-regulated	-3.49774	1.84e-11
ENSG00000042832	TG	Protein_Coding	Up-regulated	3.23243	1.94e-11
ENSG00000100167	SEPTIN3	Protein_Coding	Up-regulated	3.82188	1.94e-11
ENSG00000072195	SPEG	Protein_Coding	Down-regulated	-2.01154	2.06e-11
ENSG00000164045	CDC25A	Protein_Coding	Down-regulated	-2.13911	2.06e-11
ENSG00000224294	PINCR	lncRNA	Up-regulated	5.04762	2.17e-11
ENSG00000126391	FRMD8	Protein_Coding	Up-regulated	1.44853	2.26e-11
ENSG00000177283	FZD8	Protein_Coding	Up-regulated	1.97399	2.31e-11
ENSG00000104341	LAPTM4B	Protein_Coding	Up-regulated	1.33169	2.42e-11
ENSG00000204386	NEU1	Protein_Coding	Up-regulated	1.29493	2.55e-11
ENSG00000151876	FBXO4	Protein_Coding	Down-regulated	-2.54597	2.56e-11
ENSG00000149554	CHEK1	Protein_Coding	Down-regulated	-1.82704	2.62e-11
ENSG00000198300	PEG3	Protein_Coding	Up-regulated	3.18165	2.62e-11
ENSG00000142102	PGGHG	Protein_Coding	Down-regulated	-2.21252	2.64e-11
ENSG00000117632	STMN1	Protein_Coding	Down-regulated	-1.25873	2.86e-11
ENSG00000003056	M6PR	Protein_Coding	Up-regulated	1.34306	3.03e-11
ENSG00000095713	CRTAC1	Protein_Coding	Up-regulated	8.20876	3.08e-11
ENSG00000104723	TUSC3	Protein_Coding	Up-regulated	1.35406	3.16e-11
ENSG00000101849	TBL1X	Protein_Coding	Down-regulated	-1.52239	3.32e-11
ENSG00000181722	ZBTB20	Protein_Coding	Down-regulated	-1.56289	3.32e-11
ENSG00000050555	LAMC3	Protein_Coding	Up-regulated	4.59894	3.6e-11
ENSG00000065054	SLC9A3R2	Protein_Coding	Down-regulated	-1.28466	3.67e-11
ENSG00000140044	JDP2	Protein_Coding	Down-regulated	-1.37764	3.68e-11
ENSG00000159176	CSRP1	Protein_Coding	Down-regulated	-1.19696	3.69e-11
ENSG00000086289	EPDR1	Protein_Coding	Up-regulated	1.7998	3.79e-11
ENSG00000180875	GREM2	Protein_Coding	Down-regulated	-1.71703	3.93e-11
ENSG00000117676	RPS6KA1	Protein_Coding	Up-regulated	1.63825	3.99e-11
ENSG00000163110	PDLIM5	Protein_Coding	Down-regulated	-1.19101	4.35e-11
ENSG00000163428	LRRC58	Protein_Coding	Down-regulated	-1.4808	4.35e-11
ENSG00000176619	LMNB2	Protein_Coding	Down-regulated	-1.31982	4.48e-11
ENSG00000136999	CCN3	Protein_Coding	Up-regulated	1.62953	4.54e-11
ENSG00000134333	LDHA	Protein_Coding	Down-regulated	-1.43983	4.57e-11
ENSG00000169297	NR0B1	Protein_Coding	Up-regulated	1.69279	4.65e-11
ENSG00000273084	ENSG00000273084	lncRNA	Up-regulated	2.09515	4.66e-11
ENSG00000161509	GRIN2C	Protein_Coding	Up-regulated	8.00429	4.69e-11
ENSG00000154767	XPC	Protein_Coding	Up-regulated	1.24226	4.76e-11
ENSG00000156711	MAPK13	Protein_Coding	Up-regulated	1.35692	5.11e-11
ENSG00000183023	SLC8A1	Protein_Coding	Down-regulated	-1.64674	5.13e-11
ENSG00000100479	POLE2	Protein_Coding	Down-regulated	-2.872	5.14e-11
ENSG00000123353	ORMDL2	Protein_Coding	Up-regulated	1.36873	5.31e-11
ENSG00000141068	KSR1	Protein_Coding	Up-regulated	1.61425	5.45e-11
ENSG00000171552	BCL2L1	Protein_Coding	Up-regulated	1.23635	5.64e-11
ENSG00000119681	LTBP2	Protein_Coding	Up-regulated	1.18616	5.81e-11
ENSG00000173175	ADCY5	Protein_Coding	Up-regulated	4.9524	5.89e-11
ENSG00000040275	SPDL1	Protein_Coding	Down-regulated	-1.42797	6.09e-11
ENSG00000203760	CENPW	Protein_Coding	Down-regulated	-1.93396	6.09e-11
ENSG00000268812	LIF-AS2	lncRNA	Up-regulated	4.94528	6.55e-11
ENSG00000114383	TUSC2	Protein_Coding	Up-regulated	1.34761	6.58e-11
ENSG00000151892	GFRA1	Protein_Coding	Up-regulated	2.51415	6.8e-11
ENSG00000153531	ADPRHL1	Protein_Coding	Up-regulated	1.98315	6.8e-11
ENSG00000237975	FLG-AS1	lncRNA	Up-regulated	2.17283	6.96e-11
ENSG00000178150	ZNF114	Protein_Coding	Up-regulated	2.6125	7.12e-11
ENSG00000131015	ULBP2	Protein_Coding	Up-regulated	1.8414	7.43e-11
ENSG00000123610	TNFAIP6	Protein_Coding	Up-regulated	2.92689	7.56e-11
ENSG00000119403	PHF19	Protein_Coding	Down-regulated	-1.47903	7.93e-11
ENSG00000187741	FANCA	Protein_Coding	Down-regulated	-2.27392	8.07e-11
ENSG00000085840	ORC1	Protein_Coding	Down-regulated	-2.58832	8.21e-11
ENSG00000276107	THBS1-IT1	lncRNA	Down-regulated	-1.63625	8.3e-11
ENSG00000171604	CXXC5	Protein_Coding	Down-regulated	-1.35401	8.52e-11
ENSG00000274641	H2BC17	Protein_Coding	Up-regulated	3.45391	8.56e-11
ENSG00000095970	TREM2	Protein_Coding	Up-regulated	7.78916	9.11e-11
ENSG00000156802	ATAD2	Protein_Coding	Down-regulated	-1.51559	9.42e-11
ENSG00000186340	THBS2	Protein_Coding	Up-regulated	1.22104	9.43e-11
ENSG00000273796	ENSG00000273796	lncRNA	Up-regulated	2.40111	9.59e-11
ENSG00000272391	POM121C	Protein_Coding	Up-regulated	1.34671	9.99e-11
ENSG00000272157	ENSG00000272157	lncRNA	Up-regulated	7.83769	1.02e-10
ENSG00000108932	SLC16A6	Protein_Coding	Up-regulated	2.63122	1.03e-10
ENSG00000132424	PNISR	Protein_Coding	Down-regulated	-1.45429	1.07e-10
ENSG00000196739	COL27A1	Protein_Coding	Up-regulated	1.34418	1.09e-10
ENSG00000136144	RCBTB1	Protein_Coding	Up-regulated	1.68653	1.11e-10
ENSG00000198055	GRK6	Protein_Coding	Down-regulated	-1.53356	1.11e-10
ENSG00000249042	FAM151B-DT	lncRNA	Down-regulated	-2.40727	1.17e-10
ENSG00000123600	METTL8	Protein_Coding	Up-regulated	1.56698	1.21e-10
ENSG00000054148	PHPT1	Protein_Coding	Up-regulated	1.31192	1.22e-10
ENSG00000233695	GAS6-AS1	lncRNA	Up-regulated	2.17573	1.23e-10
ENSG00000179041	RRS1	Protein_Coding	Up-regulated	1.2967	1.25e-10
ENSG00000115355	CCDC88A	Protein_Coding	Down-regulated	-2.16473	1.32e-10
ENSG00000171246	NPTX1	Protein_Coding	Up-regulated	1.58773	1.32e-10
ENSG00000058272	PPP1R12A	Protein_Coding	Down-regulated	-1.60309	1.33e-10
ENSG00000164674	SYTL3	Protein_Coding	Down-regulated	-2.11243	1.43e-10
ENSG00000089280	FUS	Protein_Coding	Down-regulated	-1.19479	1.47e-10
ENSG00000138182	KIF20B	Protein_Coding	Down-regulated	-2.03727	1.58e-10
ENSG00000143799	PARP1	Protein_Coding	Down-regulated	-1.37723	1.59e-10
ENSG00000196576	PLXNB2	Protein_Coding	Up-regulated	1.35524	1.61e-10
ENSG00000115687	PASK	Protein_Coding	Down-regulated	-2.34013	1.67e-10
ENSG00000165029	ABCA1	Protein_Coding	Up-regulated	1.51959	1.69e-10
ENSG00000085117	CD82	Protein_Coding	Up-regulated	1.33781	1.71e-10
ENSG00000172508	CARNS1	Protein_Coding	Up-regulated	3.30404	1.72e-10
ENSG00000153885	KCTD15	Protein_Coding	Down-regulated	-1.53909	1.73e-10
ENSG00000148411	NACC2	Protein_Coding	Up-regulated	1.27159	1.74e-10
ENSG00000261801	LOXL1-AS1	lncRNA	Down-regulated	-1.66822	1.78e-10
ENSG00000185070	FLRT2	Protein_Coding	Up-regulated	1.39099	1.84e-10
ENSG00000147100	SLC16A2	Protein_Coding	Up-regulated	1.1581	1.88e-10
ENSG00000179431	FJX1	Protein_Coding	Up-regulated	1.36052	1.95e-10
ENSG00000000003	TSPAN6	Protein_Coding	Up-regulated	1.43088	2.01e-10
ENSG00000112378	PERP	Protein_Coding	Up-regulated	1.36195	2.04e-10
ENSG00000124657	OR2B6	Protein_Coding	Up-regulated	5.77778	2.34e-10
ENSG00000130176	CNN1	Protein_Coding	Down-regulated	-1.18714	2.34e-10
ENSG00000033627	ATP6V0A1	Protein_Coding	Up-regulated	1.24218	2.35e-10
ENSG00000140519	RHCG	Protein_Coding	Up-regulated	2.3457	2.35e-10
ENSG00000100968	NFATC4	Protein_Coding	Up-regulated	1.36677	2.39e-10
ENSG00000123243	ITIH5	Protein_Coding	Up-regulated	1.72401	2.42e-10
ENSG00000166317	SYNPO2L	Protein_Coding	Down-regulated	-1.81504	2.48e-10
ENSG00000178821	TMEM52	Protein_Coding	Up-regulated	3.35206	2.51e-10
ENSG00000205078	SYCE1L	Protein_Coding	Up-regulated	2.7988	2.55e-10
ENSG00000139514	SLC7A1	Protein_Coding	Down-regulated	-1.21462	2.63e-10
ENSG00000082074	FYB1	Protein_Coding	Up-regulated	2.33881	2.76e-10
ENSG00000121743	GJA3	Protein_Coding	Up-regulated	4.85583	2.76e-10
ENSG00000171867	PRNP	Protein_Coding	Up-regulated	1.24399	2.97e-10
ENSG00000197208	SLC22A4	Protein_Coding	Up-regulated	1.35982	3.01e-10
ENSG00000185115	NSMCE3	Protein_Coding	Up-regulated	1.199	3.17e-10
ENSG00000167034	NKX3-1	Protein_Coding	Up-regulated	1.61251	3.18e-10
ENSG00000197712	FAM114A1	Protein_Coding	Down-regulated	-1.16371	3.21e-10
ENSG00000244649	LINC02086	lncRNA	Up-regulated	5.56272	3.26e-10
ENSG00000140464	PML	Protein_Coding	Up-regulated	1.18101	3.31e-10
ENSG00000237989	LINC01679	lncRNA	Up-regulated	1.9744	3.33e-10
ENSG00000151726	ACSL1	Protein_Coding	Up-regulated	1.52983	3.34e-10
ENSG00000181195	PENK	Protein_Coding	Up-regulated	2.18442	3.37e-10
ENSG00000108179	PPIF	Protein_Coding	Up-regulated	1.25883	3.38e-10
ENSG00000271811	ENSG00000271811	lncRNA	Down-regulated	-2.07145	3.38e-10
ENSG00000066583	ISOC1	Protein_Coding	Up-regulated	1.57006	3.42e-10
ENSG00000184602	SNN	Protein_Coding	Up-regulated	1.91587	3.44e-10
ENSG00000143867	OSR1	Protein_Coding	Up-regulated	1.88558	3.52e-10
ENSG00000037757	MRI1	Protein_Coding	Up-regulated	1.40506	3.57e-10
ENSG00000140463	BBS4	Protein_Coding	Up-regulated	1.6089	3.61e-10
ENSG00000154639	CXADR	Protein_Coding	Up-regulated	4.43799	3.63e-10
ENSG00000163251	FZD5	Protein_Coding	Up-regulated	2.52055	3.63e-10
ENSG00000123374	CDK2	Protein_Coding	Down-regulated	-1.2694	3.66e-10
ENSG00000137404	NRM	Protein_Coding	Down-regulated	-1.38617	3.66e-10
ENSG00000138829	FBN2	Protein_Coding	Up-regulated	1.26588	3.72e-10
ENSG00000145730	PAM	Protein_Coding	Up-regulated	1.1795	3.84e-10
ENSG00000128944	KNSTRN	Protein_Coding	Down-regulated	-1.45729	4.05e-10
ENSG00000162413	KLHL21	Protein_Coding	Up-regulated	1.65819	4.12e-10
ENSG00000165799	RNASE7	Protein_Coding	Up-regulated	7.68552	4.48e-10
ENSG00000116299	ELAPOR1	Protein_Coding	Up-regulated	2.2594	4.52e-10
ENSG00000120149	MSX2	Protein_Coding	Up-regulated	1.28889	4.54e-10
ENSG00000163430	FSTL1	Protein_Coding	Up-regulated	1.40258	4.82e-10
ENSG00000100139	MICALL1	Protein_Coding	Up-regulated	1.24258	4.89e-10
ENSG00000004777	ARHGAP33	Protein_Coding	Down-regulated	-2.93842	5.22e-10
ENSG00000116701	NCF2	Protein_Coding	Down-regulated	-2.5575	5.25e-10
ENSG00000138646	HERC5	Protein_Coding	Up-regulated	1.64935	5.28e-10
ENSG00000147010	SH3KBP1	Protein_Coding	Down-regulated	-1.2263	5.28e-10
ENSG00000187193	MT1X	Protein_Coding	Down-regulated	-2.10633	5.67e-10
ENSG00000126870	DYNC2I1	Protein_Coding	Down-regulated	-1.59142	5.73e-10
ENSG00000077514	POLD3	Protein_Coding	Down-regulated	-1.58908	5.84e-10
ENSG00000117461	PIK3R3	Protein_Coding	Up-regulated	1.61293	6.07e-10
ENSG00000163399	ATP1A1	Protein_Coding	Up-regulated	1.28546	6.17e-10
ENSG00000073111	MCM2	Protein_Coding	Down-regulated	-1.41762	6.25e-10
ENSG00000169379	ARL13B	Protein_Coding	Down-regulated	-2.2717	6.37e-10
ENSG00000105220	GPI	Protein_Coding	Down-regulated	-1.22088	6.72e-10
ENSG00000105202	FBL	Protein_Coding	Down-regulated	-1.30785	6.73e-10
ENSG00000145833	DDX46	Protein_Coding	Down-regulated	-1.26632	7.08e-10
ENSG00000134597	RBMX2	Protein_Coding	Down-regulated	-1.38935	7.22e-10
ENSG00000100298	APOBEC3H	Protein_Coding	Up-regulated	7.71394	7.24e-10
ENSG00000013288	MAN2B2	Protein_Coding	Up-regulated	1.19578	7.42e-10
ENSG00000136098	NEK3	Protein_Coding	Down-regulated	-2.17035	7.58e-10
ENSG00000122367	LDB3	Protein_Coding	Down-regulated	-4.43566	7.68e-10
ENSG00000170525	PFKFB3	Protein_Coding	Up-regulated	1.28944	7.68e-10
ENSG00000106236	NPTX2	Protein_Coding	Up-regulated	4.49147	7.77e-10
ENSG00000143545	RAB13	Protein_Coding	Down-regulated	-1.60351	7.93e-10
ENSG00000182759	MAFA	Protein_Coding	Up-regulated	7.64616	8.38e-10
ENSG00000065809	FAM107B	Protein_Coding	Up-regulated	1.29618	8.39e-10
ENSG00000174780	SRP72	Protein_Coding	Down-regulated	-1.27604	8.39e-10
ENSG00000214513	NOTO	Protein_Coding	Up-regulated	7.79241	8.44e-10
ENSG00000229544	NKX1-2	Protein_Coding	Up-regulated	7.70082	8.79e-10
ENSG00000149792	MRPL49	Protein_Coding	Up-regulated	1.13599	8.96e-10
ENSG00000137507	LRRC32	Protein_Coding	Up-regulated	2.28075	9.09e-10
ENSG00000142552	RCN3	Protein_Coding	Down-regulated	-1.24337	9.54e-10
ENSG00000171462	DLK2	Protein_Coding	Up-regulated	3.25392	9.71e-10
ENSG00000169118	CSNK1G1	Protein_Coding	Up-regulated	1.34372	9.9e-10
ENSG00000160783	PMF1	Protein_Coding	Down-regulated	-1.53339	9.93e-10
ENSG00000180535	BHLHA15	Protein_Coding	Up-regulated	3.84595	1e-09
ENSG00000116132	PRRX1	Protein_Coding	Down-regulated	-1.46634	1.04e-09
ENSG00000132563	REEP2	Protein_Coding	Up-regulated	1.73722	1.05e-09
ENSG00000113504	SLC12A7	Protein_Coding	Up-regulated	1.82825	1.08e-09
ENSG00000022267	FHL1	Protein_Coding	Down-regulated	-1.16402	1.12e-09
ENSG00000270885	RASL10B	Protein_Coding	Down-regulated	-2.18265	1.12e-09
ENSG00000151348	EXT2	Protein_Coding	Up-regulated	1.17353	1.27e-09
ENSG00000129484	PARP2	Protein_Coding	Down-regulated	-1.49268	1.28e-09
ENSG00000143387	CTSK	Protein_Coding	Up-regulated	1.15618	1.3e-09
ENSG00000099901	RANBP1	Protein_Coding	Down-regulated	-1.22848	1.31e-09
ENSG00000125676	THOC2	Protein_Coding	Down-regulated	-1.30585	1.31e-09
ENSG00000164764	SBSPON	Protein_Coding	Up-regulated	1.36928	1.31e-09
ENSG00000169116	PARM1	Protein_Coding	Up-regulated	7.68463	1.31e-09
ENSG00000267757	EML2-AS1	lncRNA	Up-regulated	2.26081	1.31e-09
ENSG00000240350	SOCAR	lncRNA	Up-regulated	4.7564	1.34e-09
ENSG00000167716	WDR81	Protein_Coding	Up-regulated	1.52577	1.36e-09
ENSG00000054392	HHAT	Protein_Coding	Up-regulated	1.40673	1.38e-09
ENSG00000255310	ENSG00000255310	lncRNA	Up-regulated	2.56481	1.53e-09
ENSG00000231131	LNCAROD	lncRNA	Up-regulated	2.11201	1.59e-09
ENSG00000109854	HTATIP2	Protein_Coding	Up-regulated	1.19869	1.62e-09
ENSG00000168792	ABHD15	Protein_Coding	Up-regulated	1.39473	1.62e-09
ENSG00000044459	CNTLN	Protein_Coding	Down-regulated	-2.01747	1.63e-09
ENSG00000121064	SCPEP1	Protein_Coding	Up-regulated	1.49589	1.63e-09
ENSG00000162714	ZNF496	Protein_Coding	Down-regulated	-1.61998	1.63e-09
ENSG00000105643	ARRDC2	Protein_Coding	Up-regulated	1.46814	1.64e-09
ENSG00000128923	MINDY2	Protein_Coding	Down-regulated	-1.47099	1.64e-09
ENSG00000145147	SLIT2	Protein_Coding	Up-regulated	1.22617	1.64e-09
ENSG00000156521	TYSND1	Protein_Coding	Up-regulated	1.65532	1.69e-09
ENSG00000075568	TMEM131	Protein_Coding	Up-regulated	1.28491	1.7e-09
ENSG00000119280	C1orf198	Protein_Coding	Down-regulated	-1.10997	1.7e-09
ENSG00000185379	RAD51D	Protein_Coding	Down-regulated	-1.62356	1.71e-09
ENSG00000119283	TRIM67	Protein_Coding	Up-regulated	3.81814	1.77e-09
ENSG00000261888	ENSG00000261888	lncRNA	Up-regulated	2.36237	1.77e-09
ENSG00000102935	ZNF423	Protein_Coding	Up-regulated	2.90876	1.81e-09
ENSG00000131386	GALNT15	Protein_Coding	Down-regulated	-1.7869	1.81e-09
ENSG00000133315	MACROD1	Protein_Coding	Down-regulated	-1.71043	1.97e-09
ENSG00000182749	PAQR7	Protein_Coding	Up-regulated	1.17786	1.97e-09
ENSG00000160223	ICOSLG	Protein_Coding	Up-regulated	7.58986	2e-09
ENSG00000169744	LDB2	Protein_Coding	Down-regulated	-1.94256	2.05e-09
ENSG00000157216	SSBP3	Protein_Coding	Down-regulated	-1.26463	2.06e-09
ENSG00000196220	SRGAP3	Protein_Coding	Up-regulated	2.82049	2.09e-09
ENSG00000131351	HAUS8	Protein_Coding	Down-regulated	-1.53708	2.1e-09
ENSG00000182165	TP53TG1	lncRNA	Up-regulated	1.60681	2.1e-09
ENSG00000165244	ZNF367	Protein_Coding	Down-regulated	-2.26983	2.11e-09
ENSG00000001461	NIPAL3	Protein_Coding	Up-regulated	1.08021	2.26e-09
ENSG00000120539	MASTL	Protein_Coding	Down-regulated	-1.97196	2.26e-09
ENSG00000150551	LYPD1	Protein_Coding	Up-regulated	1.90361	2.29e-09
ENSG00000266094	RASSF5	Protein_Coding	Up-regulated	2.20087	2.3e-09
ENSG00000182326	C1S	Protein_Coding	Up-regulated	1.10312	2.4e-09
ENSG00000138131	LOXL4	Protein_Coding	Up-regulated	1.41426	2.66e-09
ENSG00000185187	SIGIRR	Protein_Coding	Down-regulated	-2.22683	2.82e-09
ENSG00000174370	KCNJ5-AS1	lncRNA	Up-regulated	2.34782	2.84e-09
ENSG00000164221	CCDC112	Protein_Coding	Down-regulated	-2.50606	2.85e-09
ENSG00000168060	NAALADL1	Protein_Coding	Down-regulated	-2.15268	2.9e-09
ENSG00000107537	PHYH	Protein_Coding	Up-regulated	1.28235	3.01e-09
ENSG00000182481	KPNA2	Protein_Coding	Down-regulated	-1.10315	3.06e-09
ENSG00000138092	CENPO	Protein_Coding	Down-regulated	-1.63998	3.13e-09
ENSG00000135966	TGFBRAP1	Protein_Coding	Up-regulated	1.26115	3.21e-09
ENSG00000013293	SLC7A14	Protein_Coding	Up-regulated	2.54996	3.23e-09
ENSG00000065060	BLTP3A	Protein_Coding	Down-regulated	-1.71553	3.38e-09
ENSG00000185896	LAMP1	Protein_Coding	Up-regulated	1.21912	3.38e-09
ENSG00000185885	IFITM1	Protein_Coding	Up-regulated	1.12185	3.48e-09
ENSG00000276180	H4C9	Protein_Coding	Up-regulated	3.59553	3.55e-09
ENSG00000156466	GDF6	Protein_Coding	Up-regulated	2.76108	3.57e-09
ENSG00000288743	ENSG00000288743	lncRNA	Up-regulated	3.29177	3.6e-09
ENSG00000169258	GPRIN1	Protein_Coding	Down-regulated	-1.80817	3.69e-09
ENSG00000137802	MAPKBP1	Protein_Coding	Up-regulated	1.2956	3.71e-09
ENSG00000120896	SORBS3	Protein_Coding	Down-regulated	-1.11162	4.07e-09
ENSG00000183010	PYCR1	Protein_Coding	Down-regulated	-1.39171	4.08e-09
ENSG00000287712	ENSG00000287712	lncRNA	Up-regulated	7.59021	4.08e-09
ENSG00000151503	NCAPD3	Protein_Coding	Down-regulated	-1.50615	4.13e-09
ENSG00000177335	LINC02904	lncRNA	Up-regulated	1.66439	4.13e-09
ENSG00000110042	DTX4	Protein_Coding	Up-regulated	1.90209	4.14e-09
ENSG00000113070	HBEGF	Protein_Coding	Up-regulated	1.39124	4.16e-09
ENSG00000234545	FAM133B	Protein_Coding	Down-regulated	-1.93117	4.16e-09
ENSG00000119707	RBM25	Protein_Coding	Down-regulated	-1.38292	4.19e-09
ENSG00000116209	TMEM59	Protein_Coding	Up-regulated	1.1171	4.22e-09
ENSG00000128285	MCHR1	Protein_Coding	Up-regulated	2.56986	4.36e-09
ENSG00000169429	CXCL8	Protein_Coding	Down-regulated	-1.36912	4.36e-09
ENSG00000159335	PTMS	Protein_Coding	Down-regulated	-1.27358	4.43e-09
ENSG00000143126	CELSR2	Protein_Coding	Up-regulated	1.67563	4.58e-09
ENSG00000083720	OXCT1	Protein_Coding	Down-regulated	-1.52705	4.62e-09
ENSG00000102032	RENBP	Protein_Coding	Down-regulated	-1.96733	4.62e-09
ENSG00000272841	MAP3K4-AS1	lncRNA	Up-regulated	2.13159	4.62e-09
ENSG00000126602	TRAP1	Protein_Coding	Down-regulated	-1.19616	4.64e-09
ENSG00000148660	CAMK2G	Protein_Coding	Down-regulated	-1.18764	4.64e-09
ENSG00000198833	UBE2J1	Protein_Coding	Down-regulated	-1.27799	4.69e-09
ENSG00000157613	CREB3L1	Protein_Coding	Down-regulated	-1.15973	4.74e-09
ENSG00000145555	MYO10	Protein_Coding	Down-regulated	-1.10249	4.75e-09
ENSG00000138944	SHISAL1	Protein_Coding	Up-regulated	1.75749	4.97e-09
ENSG00000037241	RPL26L1	Protein_Coding	Down-regulated	-1.25801	4.99e-09
ENSG00000069011	PITX1	Protein_Coding	Down-regulated	-1.2479	5.06e-09
ENSG00000181541	MAB21L2	Protein_Coding	Up-regulated	3.60707	5.11e-09
ENSG00000113916	BCL6	Protein_Coding	Up-regulated	1.32446	5.23e-09
ENSG00000126453	BCL2L12	Protein_Coding	Down-regulated	-1.80765	5.23e-09
ENSG00000205208	C4orf46	Protein_Coding	Down-regulated	-1.72642	5.49e-09
ENSG00000062582	MRPS24	Protein_Coding	Up-regulated	1.6019	5.51e-09
ENSG00000099282	TSPAN15	Protein_Coding	Down-regulated	-2.0838	5.6e-09
ENSG00000158417	EIF5B	Protein_Coding	Down-regulated	-1.3909	5.72e-09
ENSG00000157483	MYO1E	Protein_Coding	Up-regulated	1.06994	5.73e-09
ENSG00000137601	NEK1	Protein_Coding	Down-regulated	-1.62883	5.75e-09
ENSG00000136527	TRA2B	Protein_Coding	Down-regulated	-1.2841	5.8e-09
ENSG00000267317	ENSG00000267317	lncRNA	Up-regulated	1.68754	5.97e-09
ENSG00000160050	CCDC28B	Protein_Coding	Down-regulated	-2.05457	6.23e-09
ENSG00000168811	IL12A	Protein_Coding	Up-regulated	3.07449	6.28e-09
ENSG00000091436	MAP3K20	Protein_Coding	Down-regulated	-1.31817	6.33e-09
ENSG00000196083	IL1RAP	Protein_Coding	Up-regulated	2.25004	6.34e-09
ENSG00000243137	PSG4	Protein_Coding	Up-regulated	1.09298	6.42e-09
ENSG00000283154	IQCJ-SCHIP1	Protein_Coding	Up-regulated	1.46077	6.56e-09
ENSG00000166949	SMAD3	Protein_Coding	Up-regulated	1.08438	6.62e-09
ENSG00000167676	PLIN4	Protein_Coding	Up-regulated	5.52028	6.62e-09
ENSG00000123219	CENPK	Protein_Coding	Down-regulated	-2.09119	6.64e-09
ENSG00000161791	FMNL3	Protein_Coding	Down-regulated	-1.3027	6.65e-09
ENSG00000166900	STX3	Protein_Coding	Up-regulated	1.1878	6.65e-09
ENSG00000105552	BCAT2	Protein_Coding	Down-regulated	-1.39009	6.69e-09
ENSG00000132196	HSD17B7	Protein_Coding	Up-regulated	1.99234	7.17e-09
ENSG00000148219	ASTN2	Protein_Coding	Up-regulated	1.51564	7.29e-09
ENSG00000148053	NTRK2	Protein_Coding	Up-regulated	1.75031	7.32e-09
ENSG00000107262	BAG1	Protein_Coding	Up-regulated	1.25788	7.51e-09
ENSG00000135048	CEMIP2	Protein_Coding	Up-regulated	1.05571	7.61e-09
ENSG00000104147	OIP5	Protein_Coding	Down-regulated	-2.70564	7.86e-09
ENSG00000138398	PPIG	Protein_Coding	Down-regulated	-1.64104	7.86e-09
ENSG00000142227	EMP3	Protein_Coding	Down-regulated	-1.13949	8.03e-09
ENSG00000126950	TMEM35A	Protein_Coding	Up-regulated	1.67297	8.09e-09
ENSG00000258602	LINC01629	lncRNA	Up-regulated	4.72562	8.13e-09
ENSG00000165868	HSPA12A	Protein_Coding	Up-regulated	1.58009	8.17e-09
ENSG00000164124	TMEM144	Protein_Coding	Up-regulated	3.3928	8.65e-09
ENSG00000138668	HNRNPD	Protein_Coding	Down-regulated	-1.2606	8.73e-09
ENSG00000064655	EYA2	Protein_Coding	Down-regulated	-2.2421	8.77e-09
ENSG00000198707	CEP290	Protein_Coding	Down-regulated	-2.0726	8.77e-09
ENSG00000161981	SNRNP25	Protein_Coding	Down-regulated	-1.55416	8.86e-09
ENSG00000128245	YWHAH	Protein_Coding	Down-regulated	-1.07338	9.2e-09
ENSG00000123636	BAZ2B	Protein_Coding	Down-regulated	-1.52633	9.24e-09
ENSG00000198324	PHETA1	Protein_Coding	Up-regulated	1.28669	9.33e-09
ENSG00000272288	ILRUN-AS1	lncRNA	Up-regulated	2.04057	9.43e-09
ENSG00000176887	SOX11	Protein_Coding	Up-regulated	1.29847	9.49e-09
ENSG00000135069	PSAT1	Protein_Coding	Down-regulated	-1.18072	9.55e-09
ENSG00000286214	COPG2IT1	lncRNA	Up-regulated	7.51976	9.55e-09
ENSG00000127586	CHTF18	Protein_Coding	Down-regulated	-1.55991	9.72e-09
ENSG00000239697	TNFSF12	Protein_Coding	Down-regulated	-1.41956	9.81e-09
ENSG00000188157	AGRN	Protein_Coding	Up-regulated	1.45899	9.92e-09
ENSG00000130244	FAM98C	Protein_Coding	Up-regulated	1.5833	1e-08
ENSG00000166908	PIP4K2C	Protein_Coding	Up-regulated	1.13665	1.04e-08
ENSG00000289486	ENSG00000289486	lncRNA	Up-regulated	2.76273	1.12e-08
ENSG00000149201	CCDC81	Protein_Coding	Down-regulated	-1.60323	1.13e-08
ENSG00000138587	MNS1	Protein_Coding	Down-regulated	-2.92805	1.14e-08
ENSG00000156966	B3GNT7	Protein_Coding	Up-regulated	3.57742	1.14e-08
ENSG00000132205	EMILIN2	Protein_Coding	Up-regulated	1.12048	1.15e-08
ENSG00000289494	ENSG00000289494	lncRNA	Up-regulated	3.43918	1.15e-08
ENSG00000051825	MPHOSPH9	Protein_Coding	Down-regulated	-2.02795	1.18e-08
ENSG00000125520	SLC2A4RG	Protein_Coding	Down-regulated	-1.28658	1.19e-08
ENSG00000187013	LINC02875	lncRNA	Up-regulated	2.51126	1.19e-08
ENSG00000089693	MLF2	Protein_Coding	Up-regulated	1.04706	1.22e-08
ENSG00000128805	ARHGAP22	Protein_Coding	Up-regulated	1.40368	1.22e-08
ENSG00000149929	HIRIP3	Protein_Coding	Down-regulated	-1.27479	1.22e-08
ENSG00000105137	SYDE1	Protein_Coding	Down-regulated	-1.30668	1.23e-08
ENSG00000136628	EPRS1	Protein_Coding	Down-regulated	-1.0759	1.25e-08
ENSG00000131459	GFPT2	Protein_Coding	Up-regulated	1.64828	1.28e-08
ENSG00000222041	CYTOR	lncRNA	Up-regulated	1.14892	1.28e-08
ENSG00000136689	IL1RN	Protein_Coding	Down-regulated	-1.95093	1.29e-08
ENSG00000163507	CIP2A	Protein_Coding	Down-regulated	-2.3778	1.3e-08
ENSG00000115963	RND3	Protein_Coding	Up-regulated	1.41455	1.33e-08
ENSG00000150687	PRSS23	Protein_Coding	Up-regulated	1.16096	1.35e-08
ENSG00000177628	GBA1	Protein_Coding	Up-regulated	1.17422	1.36e-08
ENSG00000103723	AP3B2	Protein_Coding	Up-regulated	3.1635	1.38e-08
ENSG00000118263	KLF7	Protein_Coding	Down-regulated	-1.1867	1.38e-08
ENSG00000253293	HOXA10	Protein_Coding	Up-regulated	1.09933	1.38e-08
ENSG00000100612	DHRS7	Protein_Coding	Up-regulated	1.0972	1.43e-08
ENSG00000121690	DEPDC7	Protein_Coding	Up-regulated	1.81956	1.43e-08
ENSG00000177674	AGTRAP	Protein_Coding	Up-regulated	1.22468	1.45e-08
ENSG00000081870	HSPB11	Protein_Coding	Down-regulated	-1.40297	1.46e-08
ENSG00000160447	PKN3	Protein_Coding	Down-regulated	-1.6144	1.46e-08
ENSG00000146232	NFKBIE	Protein_Coding	Up-regulated	1.70905	1.47e-08
ENSG00000166451	CENPN	Protein_Coding	Down-regulated	-1.39251	1.49e-08
ENSG00000168566	SNRNP48	Protein_Coding	Down-regulated	-1.54117	1.51e-08
ENSG00000168610	STAT3	Protein_Coding	Up-regulated	1.08463	1.58e-08
ENSG00000277972	CISD3	Protein_Coding	Down-regulated	-1.38151	1.7e-08
ENSG00000101255	TRIB3	Protein_Coding	Down-regulated	-1.46265	1.71e-08
ENSG00000174720	LARP7	Protein_Coding	Down-regulated	-1.31432	1.71e-08
ENSG00000065989	PDE4A	Protein_Coding	Up-regulated	1.29489	1.72e-08
ENSG00000183691	NOG	Protein_Coding	Down-regulated	-1.25437	1.72e-08
ENSG00000161547	SRSF2	Protein_Coding	Down-regulated	-1.09645	1.76e-08
ENSG00000054118	THRAP3	Protein_Coding	Down-regulated	-1.04272	1.77e-08
ENSG00000104450	SPAG1	Protein_Coding	Up-regulated	1.87196	1.78e-08
ENSG00000120913	PDLIM2	Protein_Coding	Down-regulated	-1.82741	1.78e-08
ENSG00000235831	BHLHE40-AS1	lncRNA	Up-regulated	3.28917	1.79e-08
ENSG00000140941	MAP1LC3B	Protein_Coding	Up-regulated	1.08415	1.81e-08
ENSG00000156509	FBXO43	Protein_Coding	Down-regulated	-4.68004	1.84e-08
ENSG00000115107	STEAP3	Protein_Coding	Up-regulated	1.52585	1.86e-08
ENSG00000274818	ENSG00000274818	lncRNA	Up-regulated	2.90678	1.87e-08
ENSG00000135002	RFK	Protein_Coding	Up-regulated	1.62663	1.92e-08
ENSG00000257702	LBX2-AS1	lncRNA	Up-regulated	2.05287	1.95e-08
ENSG00000118960	HS1BP3	Protein_Coding	Up-regulated	1.27197	1.96e-08
ENSG00000187601	MAGEH1	Protein_Coding	Up-regulated	1.15001	1.96e-08
ENSG00000246705	H2AJ	Protein_Coding	Up-regulated	1.1463	1.96e-08
ENSG00000176912	TYMSOS	lncRNA	Up-regulated	2.38711	1.97e-08
ENSG00000167969	ECI1	Protein_Coding	Down-regulated	-1.5174	2.03e-08
ENSG00000290082	ENSG00000290082	lncRNA	Up-regulated	2.4161	2.03e-08
ENSG00000136108	CKAP2	Protein_Coding	Down-regulated	-1.64119	2.04e-08
ENSG00000140391	TSPAN3	Protein_Coding	Up-regulated	1.04782	2.05e-08
ENSG00000141127	PRPSAP2	Protein_Coding	Up-regulated	1.42271	2.05e-08
ENSG00000163754	GYG1	Protein_Coding	Up-regulated	1.17957	2.05e-08
ENSG00000122641	INHBA	Protein_Coding	Down-regulated	-1.19729	2.08e-08
ENSG00000163596	ICA1L	Protein_Coding	Down-regulated	-2.39333	2.15e-08
ENSG00000130816	DNMT1	Protein_Coding	Down-regulated	-1.13133	2.18e-08
ENSG00000196411	EPHB4	Protein_Coding	Up-regulated	1.21491	2.18e-08
ENSG00000162552	WNT4	Protein_Coding	Up-regulated	2.87751	2.19e-08
ENSG00000159164	SV2A	Protein_Coding	Down-regulated	-1.3029	2.25e-08
ENSG00000174791	RIN1	Protein_Coding	Up-regulated	1.19178	2.25e-08
ENSG00000214960	CRPPA	Protein_Coding	Up-regulated	2.14412	2.27e-08
ENSG00000082438	COBLL1	Protein_Coding	Up-regulated	1.36374	2.29e-08
ENSG00000104332	SFRP1	Protein_Coding	Up-regulated	1.15106	2.33e-08
ENSG00000164283	ESM1	Protein_Coding	Up-regulated	1.89084	2.37e-08
ENSG00000130684	ZNF337	Protein_Coding	Up-regulated	1.46015	2.38e-08
ENSG00000204131	NHSL2	Protein_Coding	Down-regulated	-1.5632	2.41e-08
ENSG00000138378	STAT4	Protein_Coding	Up-regulated	2.64663	2.42e-08
ENSG00000133069	TMCC2	Protein_Coding	Up-regulated	1.46307	2.54e-08
ENSG00000172164	SNTB1	Protein_Coding	Down-regulated	-1.62915	2.54e-08
ENSG00000002549	LAP3	Protein_Coding	Up-regulated	1.29935	2.56e-08
ENSG00000163170	BOLA3	Protein_Coding	Down-regulated	-1.45728	2.56e-08
ENSG00000221878	PSG7	Protein_Coding	Up-regulated	4.26616	2.58e-08
ENSG00000289426	ENSG00000289426	lncRNA	Up-regulated	7.44178	2.58e-08
ENSG00000111684	LPCAT3	Protein_Coding	Up-regulated	1.24411	2.6e-08
ENSG00000101928	MOSPD1	Protein_Coding	Up-regulated	1.36162	2.61e-08
ENSG00000178301	AQP11	Protein_Coding	Up-regulated	1.96293	2.61e-08
ENSG00000138675	FGF5	Protein_Coding	Down-regulated	-1.55879	2.64e-08
ENSG00000155367	PPM1J	Protein_Coding	Up-regulated	2.25321	2.65e-08
ENSG00000184575	XPOT	Protein_Coding	Down-regulated	-1.32389	2.66e-08
ENSG00000090924	PLEKHG2	Protein_Coding	Down-regulated	-1.17468	2.73e-08
ENSG00000171792	RHNO1	Protein_Coding	Down-regulated	-1.2286	2.73e-08
ENSG00000118785	SPP1	Protein_Coding	Up-regulated	1.91292	2.74e-08
ENSG00000230615	ENSG00000230615	lncRNA	Up-regulated	2.12832	2.77e-08
ENSG00000109436	TBC1D9	Protein_Coding	Up-regulated	1.24601	2.88e-08
ENSG00000148925	BTBD10	Protein_Coding	Up-regulated	1.15093	2.93e-08
ENSG00000174804	FZD4	Protein_Coding	Up-regulated	1.16289	2.95e-08
ENSG00000060982	BCAT1	Protein_Coding	Down-regulated	-1.54989	3e-08
ENSG00000011009	LYPLA2	Protein_Coding	Up-regulated	1.12711	3.1e-08
ENSG00000169733	RFNG	Protein_Coding	Up-regulated	1.27864	3.15e-08
ENSG00000117242	PINK1-AS	lncRNA	Up-regulated	1.4074	3.25e-08
ENSG00000120885	CLU	Protein_Coding	Up-regulated	1.28072	3.3e-08
ENSG00000128165	ADM2	Protein_Coding	Down-regulated	-1.31817	3.3e-08
ENSG00000142621	FHAD1	Protein_Coding	Up-regulated	4.16238	3.3e-08
ENSG00000029153	BMAL2	Protein_Coding	Down-regulated	-1.49351	3.35e-08
ENSG00000137124	ALDH1B1	Protein_Coding	Up-regulated	1.14268	3.37e-08
ENSG00000144959	NCEH1	Protein_Coding	Up-regulated	1.33354	3.52e-08
ENSG00000157227	MMP14	Protein_Coding	Up-regulated	1.20176	3.55e-08
ENSG00000135679	MDM2	Protein_Coding	Up-regulated	1.5483	3.64e-08
ENSG00000015153	YAF2	Protein_Coding	Down-regulated	-1.50591	3.69e-08
ENSG00000171540	OTP	Protein_Coding	Up-regulated	7.591	3.74e-08
ENSG00000067900	ROCK1	Protein_Coding	Down-regulated	-1.39741	3.75e-08
ENSG00000269918	ENSG00000269918	lncRNA	Up-regulated	2.07976	3.77e-08
ENSG00000183137	CEP57L1	Protein_Coding	Down-regulated	-1.7633	3.81e-08
ENSG00000198948	MFAP3L	Protein_Coding	Up-regulated	2.44124	3.94e-08
ENSG00000125657	TNFSF9	Protein_Coding	Up-regulated	3.07224	4.14e-08
ENSG00000071626	DAZAP1	Protein_Coding	Down-regulated	-1.11011	4.19e-08
ENSG00000160352	ZNF714	Protein_Coding	Down-regulated	-1.80509	4.23e-08
ENSG00000079462	PAFAH1B3	Protein_Coding	Down-regulated	-1.41872	4.32e-08
ENSG00000184897	H1-10	Protein_Coding	Down-regulated	-1.23606	4.36e-08
ENSG00000163293	NIPAL1	Protein_Coding	Up-regulated	2.12396	4.44e-08
ENSG00000258920	FOXN3-AS1	lncRNA	Up-regulated	2.61117	4.48e-08
ENSG00000102007	PLP2	Protein_Coding	Down-regulated	-1.00875	4.49e-08
ENSG00000244694	PTCHD4	Protein_Coding	Up-regulated	1.61881	4.59e-08
ENSG00000112715	VEGFA	Protein_Coding	Up-regulated	1.19097	4.75e-08
ENSG00000257556	LINC02298	lncRNA	Up-regulated	2.37411	4.91e-08
ENSG00000234546	LNCTAM34A	lncRNA	Up-regulated	1.78711	4.92e-08
ENSG00000164307	ERAP1	Protein_Coding	Up-regulated	1.49114	4.98e-08
ENSG00000160298	C21orf58	Protein_Coding	Down-regulated	-2.00804	5.03e-08
ENSG00000116016	EPAS1	Protein_Coding	Up-regulated	1.14891	5.04e-08
ENSG00000125046	SSUH2	Protein_Coding	Up-regulated	2.50249	5.24e-08
ENSG00000173442	EHBP1L1	Protein_Coding	Down-regulated	-1.27041	5.26e-08
ENSG00000184916	JAG2	Protein_Coding	Up-regulated	2.95352	5.38e-08
ENSG00000232098	ZNF584-DT	lncRNA	Up-regulated	1.66378	5.59e-08
ENSG00000157110	RBPMS	Protein_Coding	Down-regulated	-1.00628	5.6e-08
ENSG00000023902	PLEKHO1	Protein_Coding	Down-regulated	-1.14036	5.71e-08
ENSG00000162882	HAAO	Protein_Coding	Up-regulated	2.38183	5.73e-08
ENSG00000213719	CLIC1	Protein_Coding	Down-regulated	-1.12891	5.85e-08
ENSG00000106991	ENG	Protein_Coding	Down-regulated	-1.07324	5.87e-08
ENSG00000256235	SMIM3	Protein_Coding	Up-regulated	1.16605	6.01e-08
ENSG00000249859	PVT1	lncRNA	Up-regulated	1.53	6.1e-08
ENSG00000145491	ROPN1L	Protein_Coding	Up-regulated	2.88439	6.19e-08
ENSG00000122257	RBBP6	Protein_Coding	Down-regulated	-1.37759	6.24e-08
ENSG00000183763	TRAIP	Protein_Coding	Down-regulated	-1.90061	6.31e-08
ENSG00000251562	MALAT1	lncRNA	Down-regulated	-1.5879	6.36e-08
ENSG00000111817	DSE	Protein_Coding	Up-regulated	1.18202	6.38e-08
ENSG00000128050	PAICS	Protein_Coding	Down-regulated	-1.19883	6.51e-08
ENSG00000094914	AAAS	Protein_Coding	Down-regulated	-1.13519	6.55e-08
ENSG00000196072	BLOC1S2	Protein_Coding	Up-regulated	1.18992	6.62e-08
ENSG00000137074	APTX	Protein_Coding	Up-regulated	1.13438	6.67e-08
ENSG00000100281	HMGXB4	Protein_Coding	Down-regulated	-1.1682	6.68e-08
ENSG00000083812	ZNF324	Protein_Coding	Up-regulated	1.52433	6.74e-08
ENSG00000115194	SLC30A3	Protein_Coding	Up-regulated	5.1907	6.77e-08
ENSG00000140545	MFGE8	Protein_Coding	Up-regulated	1.19634	7.01e-08
ENSG00000234432	LINC02983	lncRNA	Up-regulated	2.80854	7.19e-08
ENSG00000128340	RAC2	Protein_Coding	Down-regulated	-1.25711	7.53e-08
ENSG00000114353	GNAI2	Protein_Coding	Down-regulated	-1.11043	7.54e-08
ENSG00000108424	KPNB1	Protein_Coding	Down-regulated	-1.0973	7.68e-08
ENSG00000175866	BAIAP2	Protein_Coding	Up-regulated	1.16963	7.71e-08
ENSG00000137819	PAQR5	Protein_Coding	Up-regulated	1.64285	7.77e-08
ENSG00000109083	IFT20	Protein_Coding	Up-regulated	1.22221	7.94e-08
ENSG00000077684	JADE1	Protein_Coding	Down-regulated	-1.20132	8.05e-08
ENSG00000123411	IKZF4	Protein_Coding	Down-regulated	-1.55664	8.07e-08
ENSG00000162607	USP1	Protein_Coding	Down-regulated	-1.84161	8.09e-08
ENSG00000204767	INSYN2B	Protein_Coding	Down-regulated	-1.65617	8.14e-08
ENSG00000138686	BBS7	Protein_Coding	Up-regulated	1.34486	8.34e-08
ENSG00000221968	FADS3	Protein_Coding	Up-regulated	1.09936	8.34e-08
ENSG00000101019	UQCC1	Protein_Coding	Up-regulated	1.42901	8.51e-08
ENSG00000117298	ECE1	Protein_Coding	Up-regulated	1.11435	8.82e-08
ENSG00000111670	GNPTAB	Protein_Coding	Up-regulated	1.2113	9.03e-08
ENSG00000169136	ATF5	Protein_Coding	Up-regulated	1.0472	9.16e-08
ENSG00000180801	ARSJ	Protein_Coding	Down-regulated	-1.41406	9.17e-08
ENSG00000204604	ZNF468	Protein_Coding	Up-regulated	1.60088	9.17e-08
ENSG00000230918	DPP4-DT	lncRNA	Up-regulated	2.72316	9.17e-08
ENSG00000172548	NIPAL4	Protein_Coding	Down-regulated	-1.43529	9.52e-08
ENSG00000133639	BTG1	Protein_Coding	Up-regulated	1.04069	9.64e-08
ENSG00000112249	ASCC3	Protein_Coding	Up-regulated	1.16325	9.67e-08
ENSG00000163453	IGFBP7	Protein_Coding	Up-regulated	1.05481	9.75e-08
ENSG00000132635	PCED1A	Protein_Coding	Up-regulated	1.26027	9.82e-08
ENSG00000137710	RDX	Protein_Coding	Down-regulated	-1.28179	9.82e-08
ENSG00000135919	SERPINE2	Protein_Coding	Up-regulated	1.18036	1e-07
ENSG00000106976	DNM1	Protein_Coding	Down-regulated	-1.34326	1.01e-07
ENSG00000107890	ANKRD26	Protein_Coding	Down-regulated	-1.80063	1.01e-07
ENSG00000156136	DCK	Protein_Coding	Down-regulated	-1.56453	1.01e-07
ENSG00000108187	PBLD	Protein_Coding	Up-regulated	1.6654	1.04e-07
ENSG00000107551	RASSF4	Protein_Coding	Up-regulated	1.56524	1.06e-07
ENSG00000075407	ZNF37A	Protein_Coding	Up-regulated	1.49559	1.07e-07
ENSG00000115902	SLC1A4	Protein_Coding	Down-regulated	-1.11429	1.13e-07
ENSG00000119977	TCTN3	Protein_Coding	Up-regulated	1.05699	1.13e-07
ENSG00000122420	PTGFR	Protein_Coding	Down-regulated	-1.78959	1.13e-07
ENSG00000100629	CEP128	Protein_Coding	Down-regulated	-2.15738	1.16e-07
ENSG00000104361	NIPAL2	Protein_Coding	Up-regulated	1.14873	1.16e-07
ENSG00000137959	IFI44L	Protein_Coding	Down-regulated	-1.5714	1.19e-07
ENSG00000106628	POLD2	Protein_Coding	Down-regulated	-1.0948	1.2e-07
ENSG00000132854	KANK4	Protein_Coding	Down-regulated	-1.37435	1.22e-07
ENSG00000105928	GSDME	Protein_Coding	Up-regulated	1.112	1.23e-07
ENSG00000160013	PTGIR	Protein_Coding	Down-regulated	-1.52594	1.26e-07
ENSG00000174697	LEP	Protein_Coding	Up-regulated	7.26913	1.27e-07
ENSG00000095002	MSH2	Protein_Coding	Down-regulated	-1.55559	1.29e-07
ENSG00000133739	LRRCC1	Protein_Coding	Down-regulated	-2.63321	1.29e-07
ENSG00000095739	BAMBI	Protein_Coding	Up-regulated	1.09059	1.3e-07
ENSG00000164331	ANKRA2	Protein_Coding	Up-regulated	1.30861	1.31e-07
ENSG00000184007	PTP4A2	Protein_Coding	Down-regulated	-1.09363	1.31e-07
ENSG00000137135	ARHGEF39	Protein_Coding	Down-regulated	-1.92831	1.32e-07
ENSG00000085063	CD59	Protein_Coding	Up-regulated	1.03678	1.33e-07
ENSG00000197785	ATAD3A	Protein_Coding	Down-regulated	-1.45145	1.37e-07
ENSG00000182916	TCEAL7	Protein_Coding	Up-regulated	1.47446	1.38e-07
ENSG00000178015	GPR150	Protein_Coding	Up-regulated	2.53611	1.39e-07
ENSG00000163535	SGO2	Protein_Coding	Down-regulated	-2.71263	1.43e-07
ENSG00000167157	PRRX2	Protein_Coding	Down-regulated	-1.08326	1.43e-07
ENSG00000112139	MDGA1	Protein_Coding	Up-regulated	1.71795	1.44e-07
ENSG00000213024	NUP62	Protein_Coding	Down-regulated	-1.07013	1.45e-07
ENSG00000101210	EEF1A2	Protein_Coding	Down-regulated	-1.44748	1.46e-07
ENSG00000134186	PRPF38B	Protein_Coding	Down-regulated	-1.13546	1.47e-07
ENSG00000117318	ID3	Protein_Coding	Down-regulated	-1.18455	1.5e-07
ENSG00000182199	SHMT2	Protein_Coding	Down-regulated	-1.05155	1.5e-07
ENSG00000198947	DMD	Protein_Coding	Up-regulated	1.88927	1.5e-07
ENSG00000173193	PARP14	Protein_Coding	Up-regulated	1.17505	1.52e-07
ENSG00000058056	USP13	Protein_Coding	Down-regulated	-1.49493	1.53e-07
ENSG00000167110	GOLGA2	Protein_Coding	Down-regulated	-1.00484	1.54e-07
ENSG00000110318	CEP126	Protein_Coding	Down-regulated	-1.97208	1.56e-07
ENSG00000197324	LRP10	Protein_Coding	Up-regulated	1.11923	1.58e-07
ENSG00000258457	AJUBA-DT	lncRNA	Up-regulated	2.78859	1.6e-07
ENSG00000173473	SMARCC1	Protein_Coding	Down-regulated	-1.01096	1.63e-07
ENSG00000185924	RTN4RL1	Protein_Coding	Up-regulated	2.35698	1.63e-07
ENSG00000196358	NTNG2	Protein_Coding	Up-regulated	1.97649	1.64e-07
ENSG00000260588	ENSG00000260588	lncRNA	Up-regulated	5.21085	1.64e-07
ENSG00000181222	POLR2A	Protein_Coding	Up-regulated	1.16674	1.69e-07
ENSG00000256940	PPP1R14B-AS1	lncRNA	Up-regulated	1.39808	1.7e-07
ENSG00000133878	DUSP26	Protein_Coding	Up-regulated	3.40222	1.71e-07
ENSG00000070081	NUCB2	Protein_Coding	Down-regulated	-1.58698	1.72e-07
ENSG00000081014	AP4E1	Protein_Coding	Up-regulated	1.21534	1.74e-07
ENSG00000146411	SLC2A12	Protein_Coding	Up-regulated	1.76418	1.74e-07
ENSG00000138346	DNA2	Protein_Coding	Down-regulated	-2.13332	1.75e-07
ENSG00000179588	ZFPM1	Protein_Coding	Up-regulated	1.39902	1.76e-07
ENSG00000136960	ENPP2	Protein_Coding	Up-regulated	1.12603	1.77e-07
ENSG00000178573	MAF	Protein_Coding	Up-regulated	1.56933	1.77e-07
ENSG00000083857	FAT1	Protein_Coding	Up-regulated	1.03764	1.8e-07
ENSG00000153823	PID1	Protein_Coding	Up-regulated	1.43792	1.84e-07
ENSG00000139835	GRTP1	Protein_Coding	Up-regulated	1.81305	1.88e-07
ENSG00000141858	SAMD1	Protein_Coding	Down-regulated	-1.0632	2.02e-07
ENSG00000128590	DNAJB9	Protein_Coding	Up-regulated	1.31154	2.07e-07
ENSG00000165507	DEPP1	Protein_Coding	Down-regulated	-1.45977	2.08e-07
ENSG00000270175	ENSG00000270175	lncRNA	Up-regulated	3.25593	2.1e-07
ENSG00000139438	FAM222A	Protein_Coding	Up-regulated	1.99547	2.11e-07
ENSG00000145287	PLAC8	Protein_Coding	Down-regulated	-1.60003	2.11e-07
ENSG00000073849	ST6GAL1	Protein_Coding	Up-regulated	1.93195	2.12e-07
ENSG00000146122	DAAM2	Protein_Coding	Down-regulated	-1.04471	2.12e-07
ENSG00000176953	NFATC2IP	Protein_Coding	Down-regulated	-1.11816	2.13e-07
ENSG00000101152	DNAJC5	Protein_Coding	Up-regulated	1.07028	2.15e-07
ENSG00000269190	FBXO17	Protein_Coding	Down-regulated	-1.53543	2.15e-07
ENSG00000167703	SLC43A2	Protein_Coding	Up-regulated	1.34801	2.25e-07
ENSG00000197296	FITM2	Protein_Coding	Up-regulated	1.37531	2.28e-07
ENSG00000110203	FOLR3	Protein_Coding	Up-regulated	1.63816	2.3e-07
ENSG00000102554	KLF5	Protein_Coding	Up-regulated	1.50576	2.31e-07
ENSG00000060762	MPC1	Protein_Coding	Down-regulated	-1.45334	2.38e-07
ENSG00000014138	POLA2	Protein_Coding	Down-regulated	-1.49387	2.39e-07
ENSG00000146197	SCUBE3	Protein_Coding	Down-regulated	-1.35852	2.52e-07
ENSG00000012963	UBR7	Protein_Coding	Down-regulated	-1.17898	2.53e-07
ENSG00000170340	B3GNT2	Protein_Coding	Up-regulated	1.41756	2.56e-07
ENSG00000109511	ANXA10	Protein_Coding	Up-regulated	3.7205	2.58e-07
ENSG00000114857	NKTR	Protein_Coding	Down-regulated	-1.30105	2.6e-07
ENSG00000173320	STOX2	Protein_Coding	Up-regulated	4.05262	2.63e-07
ENSG00000227268	KLLN	Protein_Coding	Up-regulated	2.54639	2.63e-07
ENSG00000289885	ENSG00000289885	lncRNA	Up-regulated	7.25578	2.72e-07
ENSG00000168938	PPIC	Protein_Coding	Up-regulated	1.01673	2.76e-07
ENSG00000107833	NPM3	Protein_Coding	Down-regulated	-1.50521	2.79e-07
ENSG00000178913	TAF7	Protein_Coding	Up-regulated	1.01152	2.8e-07
ENSG00000059122	FLYWCH1	Protein_Coding	Up-regulated	1.24171	2.85e-07
ENSG00000166532	RIMKLB	Protein_Coding	Down-regulated	-1.92676	2.9e-07
ENSG00000147274	RBMX	Protein_Coding	Down-regulated	-1.00786	2.97e-07
ENSG00000111424	VDR	Protein_Coding	Up-regulated	1.03758	2.99e-07
ENSG00000052749	RRP12	Protein_Coding	Up-regulated	1.0867	3.01e-07
ENSG00000100206	DMC1	Protein_Coding	Down-regulated	-4.12349	3.03e-07
ENSG00000126215	XRCC3	Protein_Coding	Down-regulated	-1.61268	3.07e-07
ENSG00000186283	TOR3A	Protein_Coding	Up-regulated	1.21687	3.09e-07
ENSG00000170961	HAS2	Protein_Coding	Down-regulated	-2.00099	3.11e-07
ENSG00000165832	TRUB1	Protein_Coding	Up-regulated	1.36125	3.19e-07
ENSG00000213398	LCAT	Protein_Coding	Up-regulated	1.58231	3.23e-07
ENSG00000161544	CYGB	Protein_Coding	Up-regulated	1.26799	3.34e-07
ENSG00000289047	ENSG00000289047	lncRNA	Up-regulated	1.48211	3.37e-07
ENSG00000162885	B3GALNT2	Protein_Coding	Up-regulated	1.24277	3.38e-07
ENSG00000197019	SERTAD1	Protein_Coding	Up-regulated	1.37576	3.38e-07
ENSG00000178718	RPP25	Protein_Coding	Up-regulated	1.24203	3.43e-07
ENSG00000268658	LINC00664	lncRNA	Up-regulated	2.63485	3.43e-07
ENSG00000162576	MXRA8	Protein_Coding	Down-regulated	-1.11884	3.45e-07
ENSG00000011143	MKS1	Protein_Coding	Down-regulated	-1.51225	3.47e-07
ENSG00000184939	ZFP90	Protein_Coding	Up-regulated	1.2644	3.47e-07
ENSG00000204219	TCEA3	Protein_Coding	Up-regulated	1.0829	3.47e-07
ENSG00000105726	ATP13A1	Protein_Coding	Up-regulated	1.01413	3.56e-07
ENSG00000116161	CACYBP	Protein_Coding	Down-regulated	-1.24181	3.58e-07
ENSG00000075624	ACTB	Protein_Coding	Down-regulated	-1.39479	3.63e-07
ENSG00000137831	UACA	Protein_Coding	Down-regulated	-1.32447	3.64e-07
ENSG00000125827	TMX4	Protein_Coding	Up-regulated	1.06994	3.69e-07
ENSG00000087303	NID2	Protein_Coding	Up-regulated	1.06231	3.72e-07
ENSG00000117308	GALE	Protein_Coding	Up-regulated	1.22037	3.8e-07
ENSG00000130921	MTRFR	Protein_Coding	Down-regulated	-1.27243	3.8e-07
ENSG00000141574	SECTM1	Protein_Coding	Up-regulated	1.23876	3.89e-07
ENSG00000127399	LRRC61	Protein_Coding	Up-regulated	2.27674	3.93e-07
ENSG00000228716	DHFR	Protein_Coding	Down-regulated	-1.29778	3.93e-07
ENSG00000130303	BST2	Protein_Coding	Up-regulated	1.22436	4e-07
ENSG00000064042	LIMCH1	Protein_Coding	Down-regulated	-1.27155	4.08e-07
ENSG00000231811	ENSG00000231811	lncRNA	Up-regulated	3.23355	4.14e-07
ENSG00000204520	MICA	Protein_Coding	Up-regulated	1.1244	4.18e-07
ENSG00000127337	YEATS4	Protein_Coding	Down-regulated	-2.3927	4.46e-07
ENSG00000182010	RTKN2	Protein_Coding	Down-regulated	-2.18494	4.49e-07
ENSG00000162545	CAMK2N1	Protein_Coding	Down-regulated	-1.02958	4.63e-07
ENSG00000129003	VPS13C	Protein_Coding	Up-regulated	1.18218	4.65e-07
ENSG00000165525	NEMF	Protein_Coding	Down-regulated	-1.23956	4.65e-07
ENSG00000172409	CLP1	Protein_Coding	Up-regulated	1.23957	4.65e-07
ENSG00000159399	HK2	Protein_Coding	Up-regulated	1.09056	4.66e-07
ENSG00000153879	CEBPG	Protein_Coding	Down-regulated	-1.31853	4.8e-07
ENSG00000091656	ZFHX4	Protein_Coding	Down-regulated	-1.41107	4.83e-07
ENSG00000110013	SIAE	Protein_Coding	Up-regulated	1.44182	4.86e-07
ENSG00000005486	RHBDD2	Protein_Coding	Up-regulated	1.02898	4.88e-07
ENSG00000185499	MUC1	Protein_Coding	Down-regulated	-1.59392	4.93e-07
ENSG00000146006	LRRTM2	Protein_Coding	Up-regulated	7.11064	4.94e-07
ENSG00000176422	SPRYD4	Protein_Coding	Up-regulated	1.14438	5.03e-07
ENSG00000143067	ZNF697	Protein_Coding	Up-regulated	1.37797	5.04e-07
ENSG00000120334	CENPL	Protein_Coding	Down-regulated	-1.34157	5.22e-07
ENSG00000113971	NPHP3	Protein_Coding	Down-regulated	-1.43855	5.36e-07
ENSG00000100949	RABGGTA	Protein_Coding	Up-regulated	1.05436	5.37e-07
ENSG00000102760	RGCC	Protein_Coding	Up-regulated	2.14786	5.37e-07
ENSG00000105650	PDE4C	Protein_Coding	Up-regulated	3.96118	5.42e-07
ENSG00000162572	SCNN1D	Protein_Coding	Up-regulated	3.63818	5.44e-07
ENSG00000185669	SNAI3	Protein_Coding	Up-regulated	7.09019	5.61e-07
ENSG00000147889	CDKN2A	Protein_Coding	Down-regulated	-2.12394	5.79e-07
ENSG00000185104	FAF1	Protein_Coding	Down-regulated	-1.05959	5.79e-07
ENSG00000198625	MDM4	Protein_Coding	Down-regulated	-1.44135	6.01e-07
ENSG00000125753	VASP	Protein_Coding	Down-regulated	-1.00441	6.04e-07
ENSG00000164114	MAP9	Protein_Coding	Down-regulated	-1.76938	6.04e-07
ENSG00000088280	ASAP3	Protein_Coding	Up-regulated	1.24967	6.12e-07
ENSG00000163346	PBXIP1	Protein_Coding	Up-regulated	1.06617	6.16e-07
ENSG00000196352	CD55	Protein_Coding	Up-regulated	1.07289	6.24e-07
ENSG00000181649	PHLDA2	Protein_Coding	Up-regulated	1.03769	6.29e-07
ENSG00000124249	KCNK15	Protein_Coding	Up-regulated	2.3373	6.33e-07
ENSG00000154719	MRPL39	Protein_Coding	Up-regulated	1.03419	6.36e-07
ENSG00000143344	RGL1	Protein_Coding	Up-regulated	1.03362	6.47e-07
ENSG00000157927	RADIL	Protein_Coding	Down-regulated	-2.6039	6.48e-07
ENSG00000198157	HMGN5	Protein_Coding	Down-regulated	-1.62252	6.48e-07
ENSG00000169991	IFFO2	Protein_Coding	Up-regulated	1.05297	6.5e-07
ENSG00000067836	ROGDI	Protein_Coding	Down-regulated	-1.57519	6.56e-07
ENSG00000102409	BEX4	Protein_Coding	Up-regulated	1.06124	6.62e-07
ENSG00000227811	INKA2-AS1	lncRNA	Up-regulated	2.29056	6.62e-07
ENSG00000173406	DAB1	Protein_Coding	Down-regulated	-1.46895	6.67e-07
ENSG00000011007	ELOA	Protein_Coding	Up-regulated	1.01687	6.72e-07
ENSG00000232859	LYRM9	Protein_Coding	Up-regulated	1.50317	6.77e-07
ENSG00000249669	CARMN	lncRNA	Down-regulated	-1.73143	7e-07
ENSG00000164548	TRA2A	Protein_Coding	Down-regulated	-1.16961	7.13e-07
ENSG00000188827	SLX4	Protein_Coding	Down-regulated	-1.62752	7.26e-07
ENSG00000189275	LINC01164	lncRNA	Up-regulated	7.07362	7.56e-07
ENSG00000165458	INPPL1	Protein_Coding	Up-regulated	1.01242	7.57e-07
ENSG00000074211	PPP2R2C	Protein_Coding	Up-regulated	7.07362	7.58e-07
ENSG00000107815	TWNK	Protein_Coding	Up-regulated	1.2321	7.67e-07
ENSG00000168061	SAC3D1	Protein_Coding	Up-regulated	1.13612	7.69e-07
ENSG00000122565	CBX3	Protein_Coding	Down-regulated	-1.24798	7.7e-07
ENSG00000198018	ENTPD7	Protein_Coding	Up-regulated	1.20013	7.85e-07
ENSG00000253227	ENSG00000253227	lncRNA	Up-regulated	2.30293	7.85e-07
ENSG00000155816	FMN2	Protein_Coding	Down-regulated	-1.24352	7.9e-07
ENSG00000080824	HSP90AA1	Protein_Coding	Down-regulated	-1.1413	7.91e-07
ENSG00000289511	ENSG00000289511	lncRNA	Up-regulated	1.70598	7.96e-07
ENSG00000075618	FSCN1	Protein_Coding	Up-regulated	1.12593	8.24e-07
ENSG00000176046	NUPR1	Protein_Coding	Down-regulated	-1.70118	8.44e-07
ENSG00000149577	SIDT2	Protein_Coding	Up-regulated	1.0984	8.46e-07
ENSG00000188130	MAPK12	Protein_Coding	Down-regulated	-1.36408	8.49e-07
ENSG00000128881	TTBK2	Protein_Coding	Down-regulated	-1.42848	8.57e-07
ENSG00000006283	CACNA1G	Protein_Coding	Up-regulated	3.40043	8.65e-07
ENSG00000111885	MAN1A1	Protein_Coding	Up-regulated	1.4844	8.67e-07
ENSG00000144597	EAF1	Protein_Coding	Up-regulated	1.07704	8.67e-07
ENSG00000123124	WWP1	Protein_Coding	Up-regulated	1.38966	9e-07
ENSG00000180921	FAM83H	Protein_Coding	Up-regulated	1.27508	9e-07
ENSG00000168172	HOOK3	Protein_Coding	Down-regulated	-1.12134	9.07e-07
ENSG00000164035	EMCN	Protein_Coding	Down-regulated	-2.63171	9.29e-07
ENSG00000135976	ANKRD36	Protein_Coding	Down-regulated	-3.46634	9.37e-07
ENSG00000117569	PTBP2	Protein_Coding	Down-regulated	-1.98057	9.75e-07
ENSG00000217555	CKLF	Protein_Coding	Down-regulated	-1.66388	9.87e-07
ENSG00000286177	ENSG00000286177	lncRNA	Up-regulated	1.61884	9.93e-07
ENSG00000278637	H4C1	Protein_Coding	Down-regulated	-7.59802	1e-06
ENSG00000197746	PSAP	Protein_Coding	Up-regulated	1.22272	1.01e-06
ENSG00000090674	MCOLN1	Protein_Coding	Up-regulated	1.08002	1.03e-06
ENSG00000176909	MAMSTR	Protein_Coding	Down-regulated	-2.17995	1.04e-06
ENSG00000184785	SMIM10	Protein_Coding	Down-regulated	-1.6954	1.04e-06
ENSG00000152795	HNRNPDL	Protein_Coding	Down-regulated	-1.10236	1.07e-06
ENSG00000112419	PHACTR2	Protein_Coding	Down-regulated	-1.34654	1.08e-06
ENSG00000174227	PIGG	Protein_Coding	Up-regulated	1.04824	1.1e-06
ENSG00000122862	SRGN	Protein_Coding	Up-regulated	1.62958	1.12e-06
ENSG00000102387	TAF7L	Protein_Coding	Up-regulated	3.70852	1.14e-06
ENSG00000123364	HOXC13	Protein_Coding	Up-regulated	1.27586	1.14e-06
ENSG00000118762	PKD2	Protein_Coding	Up-regulated	1.08512	1.16e-06
ENSG00000116741	RGS2	Protein_Coding	Down-regulated	-1.46038	1.19e-06
ENSG00000259091	LINC00517	lncRNA	Down-regulated	-2.2131	1.2e-06
ENSG00000152240	HAUS1	Protein_Coding	Down-regulated	-1.29558	1.22e-06
ENSG00000171105	INSR	Protein_Coding	Down-regulated	-1.26833	1.22e-06
ENSG00000136478	TEX2	Protein_Coding	Up-regulated	1.02165	1.23e-06
ENSG00000277639	ENSG00000277639	Protein_Coding	Up-regulated	1.45558	1.23e-06
ENSG00000157600	TMEM164	Protein_Coding	Up-regulated	1.16594	1.24e-06
ENSG00000119866	BCL11A	Protein_Coding	Down-regulated	-2.20771	1.25e-06
ENSG00000272711	HK2-DT	lncRNA	Up-regulated	2.03198	1.25e-06
ENSG00000003249	DBNDD1	Protein_Coding	Up-regulated	1.15492	1.27e-06
ENSG00000188735	TMEM120B	Protein_Coding	Up-regulated	1.17728	1.29e-06
ENSG00000099953	MMP11	Protein_Coding	Down-regulated	-1.28595	1.32e-06
ENSG00000237512	UNC5B-AS1	lncRNA	Up-regulated	1.89927	1.32e-06
ENSG00000289612	ENSG00000289612	lncRNA	Down-regulated	-4.36046	1.33e-06
ENSG00000203814	H2BC18	Protein_Coding	Up-regulated	6.98146	1.36e-06
ENSG00000178234	GALNT11	Protein_Coding	Up-regulated	1.18956	1.39e-06
ENSG00000183421	RIPK4	Protein_Coding	Up-regulated	1.79698	1.39e-06
ENSG00000107021	TBC1D13	Protein_Coding	Up-regulated	1.09788	1.41e-06
ENSG00000137338	PGBD1	Protein_Coding	Down-regulated	-1.7068	1.41e-06
ENSG00000170759	KIF5B	Protein_Coding	Down-regulated	-1.20531	1.41e-06
ENSG00000106804	C5	Protein_Coding	Down-regulated	-2.47136	1.51e-06
ENSG00000163131	CTSS	Protein_Coding	Up-regulated	1.20812	1.52e-06
ENSG00000082497	SERTAD4	Protein_Coding	Down-regulated	-1.49649	1.53e-06
ENSG00000172081	MOB3A	Protein_Coding	Down-regulated	-1.01668	1.54e-06
ENSG00000124098	FAM210B	Protein_Coding	Up-regulated	1.03013	1.55e-06
ENSG00000137752	CASP1	Protein_Coding	Up-regulated	1.19522	1.57e-06
ENSG00000173926	MARCHF3	Protein_Coding	Up-regulated	1.53519	1.57e-06
ENSG00000183696	UPP1	Protein_Coding	Up-regulated	1.18829	1.57e-06
ENSG00000185347	TEDC1	Protein_Coding	Down-regulated	-1.42639	1.57e-06
ENSG00000119720	NRDE2	Protein_Coding	Down-regulated	-1.18231	1.58e-06
ENSG00000144339	TMEFF2	Protein_Coding	Up-regulated	6.96709	1.58e-06
ENSG00000273729	ENSG00000273729	lncRNA	Up-regulated	2.17981	1.58e-06
ENSG00000196814	MVB12B	Protein_Coding	Up-regulated	1.27957	1.6e-06
ENSG00000143891	GALM	Protein_Coding	Down-regulated	-1.44477	1.61e-06
ENSG00000185818	NAT8L	Protein_Coding	Up-regulated	2.19123	1.62e-06
ENSG00000204947	ZNF425	Protein_Coding	Up-regulated	1.59268	1.62e-06
ENSG00000214530	STARD10	Protein_Coding	Up-regulated	1.17254	1.63e-06
ENSG00000203446	SUGCT-AS1	lncRNA	Up-regulated	2.86367	1.66e-06
ENSG00000170310	STX8	Protein_Coding	Down-regulated	-1.18888	1.68e-06
ENSG00000185875	THNSL1	Protein_Coding	Up-regulated	1.62002	1.7e-06
ENSG00000011105	TSPAN9	Protein_Coding	Up-regulated	1.15181	1.71e-06
ENSG00000163931	TKT	Protein_Coding	Up-regulated	1.13027	1.74e-06
ENSG00000175832	ETV4	Protein_Coding	Up-regulated	1.42059	1.79e-06
ENSG00000123342	MMP19	Protein_Coding	Up-regulated	1.07369	1.8e-06
ENSG00000178922	HYI	Protein_Coding	Up-regulated	1.02022	1.81e-06
ENSG00000137843	PAK6	Protein_Coding	Up-regulated	4.34556	1.86e-06
ENSG00000183765	CHEK2	Protein_Coding	Down-regulated	-1.45584	1.93e-06
ENSG00000198331	HYLS1	Protein_Coding	Down-regulated	-1.31456	1.93e-06
ENSG00000136002	ARHGEF4	Protein_Coding	Down-regulated	-1.64395	1.94e-06
ENSG00000166986	MARS1	Protein_Coding	Down-regulated	-1.00116	1.94e-06
ENSG00000176401	EID2B	Protein_Coding	Up-regulated	1.60955	1.95e-06
ENSG00000105849	POLR1F	Protein_Coding	Down-regulated	-1.35351	1.97e-06
ENSG00000114346	ECT2	Protein_Coding	Down-regulated	-1.63199	1.98e-06
ENSG00000140511	HAPLN3	Protein_Coding	Up-regulated	1.19528	2.02e-06
ENSG00000143450	OAZ3	Protein_Coding	Up-regulated	1.8002	2.03e-06
ENSG00000100284	TOM1	Protein_Coding	Up-regulated	1.1208	2.04e-06
ENSG00000102057	KCND1	Protein_Coding	Down-regulated	-1.60946	2.05e-06
ENSG00000154027	AK5	Protein_Coding	Down-regulated	-1.04279	2.08e-06
ENSG00000167447	SMG8	Protein_Coding	Up-regulated	1.22927	2.08e-06
ENSG00000121390	PSPC1	Protein_Coding	Up-regulated	1.05683	2.1e-06
ENSG00000138395	CDK15	Protein_Coding	Down-regulated	-1.92603	2.1e-06
ENSG00000175318	GRAMD2A	Protein_Coding	Up-regulated	3.56018	2.1e-06
ENSG00000119801	YPEL5	Protein_Coding	Up-regulated	1.04596	2.13e-06
ENSG00000136274	NACAD	Protein_Coding	Down-regulated	-1.55565	2.13e-06
ENSG00000287516	ENSG00000287516	lncRNA	Up-regulated	1.70131	2.16e-06
ENSG00000134762	DSC3	Protein_Coding	Up-regulated	6.94085	2.19e-06
ENSG00000129467	ADCY4	Protein_Coding	Up-regulated	1.80738	2.23e-06
ENSG00000107798	LIPA	Protein_Coding	Up-regulated	1.14612	2.24e-06
ENSG00000165630	PRPF18	Protein_Coding	Up-regulated	1.09854	2.24e-06
ENSG00000177556	ATOX1	Protein_Coding	Up-regulated	1.01556	2.24e-06
ENSG00000141577	CEP131	Protein_Coding	Down-regulated	-1.24792	2.25e-06
ENSG00000159884	CCDC107	Protein_Coding	Down-regulated	-1.21529	2.27e-06
ENSG00000129667	RHBDF2	Protein_Coding	Up-regulated	1.38597	2.28e-06
ENSG00000184060	ADAP2	Protein_Coding	Up-regulated	3.09241	2.28e-06
ENSG00000196839	ADA	Protein_Coding	Up-regulated	1.04984	2.34e-06
ENSG00000108588	CCDC47	Protein_Coding	Up-regulated	1.01242	2.35e-06
ENSG00000171219	CDC42BPG	Protein_Coding	Up-regulated	2.7703	2.35e-06
ENSG00000227252	COPS8-DT	lncRNA	Up-regulated	1.87505	2.35e-06
ENSG00000104320	NBN	Protein_Coding	Down-regulated	-1.3799	2.36e-06
ENSG00000184675	AMER1	Protein_Coding	Up-regulated	1.52389	2.37e-06
ENSG00000133466	C1QTNF6	Protein_Coding	Down-regulated	-1.5298	2.39e-06
ENSG00000104635	SLC39A14	Protein_Coding	Up-regulated	1.00168	2.41e-06
ENSG00000165490	DDIAS	Protein_Coding	Down-regulated	-2.18935	2.41e-06
ENSG00000113318	MSH3	Protein_Coding	Down-regulated	-1.26778	2.42e-06
ENSG00000260193	LINC02846	lncRNA	Up-regulated	2.42789	2.43e-06
ENSG00000160949	TONSL	Protein_Coding	Down-regulated	-1.38444	2.46e-06
ENSG00000181751	MACIR	Protein_Coding	Down-regulated	-1.18474	2.46e-06
ENSG00000183077	AFMID	Protein_Coding	Down-regulated	-1.31645	2.46e-06
ENSG00000101003	GINS1	Protein_Coding	Down-regulated	-1.35228	2.51e-06
ENSG00000086619	ERO1B	Protein_Coding	Up-regulated	1.87698	2.56e-06
ENSG00000100038	TOP3B	Protein_Coding	Up-regulated	1.12596	2.58e-06
ENSG00000286013	ENSG00000286013	lncRNA	Down-regulated	-2.1219	2.62e-06
ENSG00000116991	SIPA1L2	Protein_Coding	Up-regulated	1.27567	2.7e-06
ENSG00000169908	TM4SF1	Protein_Coding	Down-regulated	-1.29526	2.74e-06
ENSG00000100767	PAPLN	Protein_Coding	Up-regulated	2.31786	2.81e-06
ENSG00000169083	AR	Protein_Coding	Down-regulated	-1.06228	2.81e-06
ENSG00000065675	PRKCQ	Protein_Coding	Up-regulated	6.88374	2.91e-06
ENSG00000182263	FIGN	Protein_Coding	Down-regulated	-1.95941	2.91e-06
ENSG00000102302	FGD1	Protein_Coding	Down-regulated	-1.05707	2.96e-06
ENSG00000176845	METRNL	Protein_Coding	Up-regulated	1.04633	2.98e-06
ENSG00000198860	TSEN15	Protein_Coding	Down-regulated	-1.34242	3.02e-06
ENSG00000144031	ANKRD53	Protein_Coding	Up-regulated	1.90033	3.09e-06
ENSG00000117153	KLHL12	Protein_Coding	Up-regulated	1.01945	3.16e-06
ENSG00000143162	CREG1	Protein_Coding	Up-regulated	1.34868	3.16e-06
ENSG00000074755	ZZEF1	Protein_Coding	Up-regulated	1.01588	3.19e-06
ENSG00000111678	C12orf57	Protein_Coding	Down-regulated	-1.10329	3.25e-06
ENSG00000133424	LARGE1	Protein_Coding	Up-regulated	1.17251	3.33e-06
ENSG00000172432	GTPBP2	Protein_Coding	Down-regulated	-1.08218	3.33e-06
ENSG00000128311	TST	Protein_Coding	Up-regulated	1.24541	3.35e-06
ENSG00000197442	MAP3K5	Protein_Coding	Down-regulated	-1.45934	3.35e-06
ENSG00000117523	PRRC2C	Protein_Coding	Down-regulated	-1.05688	3.51e-06
ENSG00000169814	BTD	Protein_Coding	Up-regulated	1.07559	3.51e-06
ENSG00000259426	KIF23-AS1	lncRNA	Down-regulated	-1.59506	3.51e-06
ENSG00000148290	SURF1	Protein_Coding	Up-regulated	1.23739	3.68e-06
ENSG00000179598	PLD6	Protein_Coding	Up-regulated	1.68998	3.73e-06
ENSG00000226889	ATF6-DT	lncRNA	Up-regulated	3.33366	3.84e-06
ENSG00000151012	SLC7A11	Protein_Coding	Down-regulated	-1.09393	3.86e-06
ENSG00000072840	EVC	Protein_Coding	Up-regulated	1.02511	3.92e-06
ENSG00000104365	IKBKB	Protein_Coding	Up-regulated	1.00012	3.92e-06
ENSG00000236423	LINC01134	lncRNA	Up-regulated	2.70452	3.92e-06
ENSG00000150779	TIMM8B	Protein_Coding	Up-regulated	1.03585	4.04e-06
ENSG00000183668	PSG9	Protein_Coding	Up-regulated	3.38497	4.04e-06
ENSG00000072071	ADGRL1	Protein_Coding	Up-regulated	1.29558	4.06e-06
ENSG00000261659	ENSG00000261659	lncRNA	Up-regulated	2.24701	4.06e-06
ENSG00000139269	INHBE	Protein_Coding	Down-regulated	-4.53928	4.14e-06
ENSG00000281344	HELLPAR	lncRNA	Down-regulated	-2.43723	4.18e-06
ENSG00000148842	CNNM2	Protein_Coding	Up-regulated	1.22645	4.26e-06
ENSG00000254726	MEX3A	Protein_Coding	Down-regulated	-1.2714	4.28e-06
ENSG00000159674	SPON2	Protein_Coding	Up-regulated	1.09843	4.3e-06
ENSG00000167460	TPM4	Protein_Coding	Down-regulated	-1.10646	4.33e-06
ENSG00000178752	ERFE	Protein_Coding	Down-regulated	-2.14987	4.34e-06
ENSG00000122786	CALD1	Protein_Coding	Down-regulated	-1.04924	4.35e-06
ENSG00000248092	NNT-AS1	lncRNA	Down-regulated	-1.28258	4.37e-06
ENSG00000258655	ARHGAP5-AS1	lncRNA	Up-regulated	1.84941	4.39e-06
ENSG00000260577	CDH3-AS1	lncRNA	Up-regulated	2.92239	4.4e-06
ENSG00000236914	LINC01852	lncRNA	Up-regulated	1.90212	4.41e-06
ENSG00000254510	ENSG00000254510	lncRNA	Down-regulated	-3.16698	4.46e-06
ENSG00000164733	CTSB	Protein_Coding	Up-regulated	1.12911	4.52e-06
ENSG00000276116	FUT8-AS1	lncRNA	Up-regulated	1.95877	4.52e-06
ENSG00000109189	USP46	Protein_Coding	Up-regulated	1.28516	4.57e-06
ENSG00000033867	SLC4A7	Protein_Coding	Down-regulated	-1.15722	4.64e-06
ENSG00000163947	ARHGEF3	Protein_Coding	Up-regulated	1.35136	4.66e-06
ENSG00000258777	HIF1A-AS1	lncRNA	Up-regulated	4.19431	4.67e-06
ENSG00000136936	XPA	Protein_Coding	Down-regulated	-1.47885	4.69e-06
ENSG00000179862	CITED4	Protein_Coding	Up-regulated	1.43154	4.73e-06
ENSG00000223382	LINC01778	lncRNA	Up-regulated	3.42227	4.82e-06
ENSG00000128872	TMOD2	Protein_Coding	Down-regulated	-1.54866	4.87e-06
ENSG00000107485	GATA3	Protein_Coding	Up-regulated	1.30791	4.89e-06
ENSG00000129925	PGAP6	Protein_Coding	Up-regulated	1.04651	4.89e-06
ENSG00000121057	AKAP1	Protein_Coding	Up-regulated	1.22403	4.95e-06
ENSG00000182667	NTM	Protein_Coding	Down-regulated	-1.20135	4.95e-06
ENSG00000178585	CTNNBIP1	Protein_Coding	Up-regulated	1.01262	4.98e-06
ENSG00000151014	NOCT	Protein_Coding	Up-regulated	1.52599	5.02e-06
ENSG00000108055	SMC3	Protein_Coding	Down-regulated	-1.02124	5.11e-06
ENSG00000160703	NLRX1	Protein_Coding	Up-regulated	1.07068	5.12e-06
ENSG00000184922	FMNL1	Protein_Coding	Down-regulated	-1.78906	5.12e-06
ENSG00000154188	ANGPT1	Protein_Coding	Down-regulated	-1.79461	5.17e-06
ENSG00000176894	PXMP2	Protein_Coding	Down-regulated	-2.16152	5.2e-06
ENSG00000118242	MREG	Protein_Coding	Up-regulated	1.72289	5.26e-06
ENSG00000184486	POU3F2	Protein_Coding	Up-regulated	6.94173	5.29e-06
ENSG00000143514	TP53BP2	Protein_Coding	Up-regulated	1.02565	5.38e-06
ENSG00000164746	C7orf57	Protein_Coding	Up-regulated	3.46626	5.38e-06
ENSG00000196950	SLC39A10	Protein_Coding	Up-regulated	1.40842	5.42e-06
ENSG00000103056	SMPD3	Protein_Coding	Up-regulated	3.53628	5.53e-06
ENSG00000164610	RP9	Protein_Coding	Down-regulated	-1.15989	5.57e-06
ENSG00000162604	TM2D1	Protein_Coding	Up-regulated	1.19614	5.62e-06
ENSG00000255400	LINC02989	lncRNA	Up-regulated	3.73649	5.65e-06
ENSG00000179630	LACC1	Protein_Coding	Up-regulated	1.76556	5.88e-06
ENSG00000136156	ITM2B	Protein_Coding	Up-regulated	1.05054	5.92e-06
ENSG00000148908	RGS10	Protein_Coding	Down-regulated	-1.14776	5.93e-06
ENSG00000112763	BTN2A1	Protein_Coding	Up-regulated	1.06075	6.02e-06
ENSG00000122566	HNRNPA2B1	Protein_Coding	Down-regulated	-1.00721	6.02e-06
ENSG00000118402	ELOVL4	Protein_Coding	Up-regulated	1.73889	6.12e-06
ENSG00000162627	SNX7	Protein_Coding	Down-regulated	-1.16024	6.12e-06
ENSG00000165985	C1QL3	Protein_Coding	Up-regulated	6.91686	6.12e-06
ENSG00000111012	CYP27B1	Protein_Coding	Up-regulated	1.9512	6.13e-06
ENSG00000228253	MT-ATP8	Protein_Coding	Down-regulated	-2.19868	6.25e-06
ENSG00000154114	TBCEL	Protein_Coding	Up-regulated	1.05759	6.3e-06
ENSG00000076248	UNG	Protein_Coding	Down-regulated	-1.10871	6.33e-06
ENSG00000128656	CHN1	Protein_Coding	Down-regulated	-1.41876	6.42e-06
ENSG00000162755	KLHDC9	Protein_Coding	Down-regulated	-3.57473	6.44e-06
ENSG00000119685	TTLL5	Protein_Coding	Down-regulated	-1.2271	6.45e-06
ENSG00000124126	PREX1	Protein_Coding	Down-regulated	-1.27184	6.48e-06
ENSG00000137221	TJAP1	Protein_Coding	Up-regulated	1.00226	6.52e-06
ENSG00000198840	MT-ND3	Protein_Coding	Down-regulated	-1.67234	6.52e-06
ENSG00000165731	RET	Protein_Coding	Up-regulated	2.49367	6.53e-06
ENSG00000154920	EME1	Protein_Coding	Down-regulated	-1.80096	6.54e-06
ENSG00000091490	SEL1L3	Protein_Coding	Up-regulated	1.47132	6.61e-06
ENSG00000135951	TSGA10	Protein_Coding	Up-regulated	2.53482	6.74e-06
ENSG00000168389	MFSD2A	Protein_Coding	Up-regulated	1.82044	6.74e-06
ENSG00000255471	PRSS23-AS1	lncRNA	Up-regulated	2.7106	6.8e-06
ENSG00000262406	MMP12	Protein_Coding	Up-regulated	1.64753	6.8e-06
ENSG00000172159	FRMD3	Protein_Coding	Down-regulated	-1.53723	6.81e-06
ENSG00000132429	POPDC3	Protein_Coding	Down-regulated	-1.80349	6.88e-06
ENSG00000108602	ALDH3A1	Protein_Coding	Up-regulated	6.82399	6.98e-06
ENSG00000009413	REV3L	Protein_Coding	Up-regulated	1.06771	7.01e-06
ENSG00000117020	AKT3	Protein_Coding	Down-regulated	-1.04459	7.1e-06
ENSG00000260868	LINC01960	lncRNA	Up-regulated	2.95056	7.15e-06
ENSG00000100532	CGRRF1	Protein_Coding	Up-regulated	1.54373	7.24e-06
ENSG00000156345	CDK20	Protein_Coding	Up-regulated	1.31716	7.24e-06
ENSG00000115318	LOXL3	Protein_Coding	Down-regulated	-1.06174	7.29e-06
ENSG00000188372	ZP3	Protein_Coding	Up-regulated	2.40683	7.35e-06
ENSG00000132185	FCRLA	Protein_Coding	Up-regulated	1.29971	7.36e-06
ENSG00000104472	CHRAC1	Protein_Coding	Down-regulated	-1.07165	7.58e-06
ENSG00000168546	GFRA2	Protein_Coding	Up-regulated	2.25505	7.58e-06
ENSG00000159231	CBR3	Protein_Coding	Down-regulated	-1.12729	7.61e-06
ENSG00000172716	SLFN11	Protein_Coding	Down-regulated	-1.94896	7.77e-06
ENSG00000184898	RBM43	Protein_Coding	Up-regulated	1.57221	7.86e-06
ENSG00000204304	PBX2	Protein_Coding	Down-regulated	-1.00186	8.02e-06
ENSG00000128408	RIBC2	Protein_Coding	Down-regulated	-1.86083	8.04e-06
ENSG00000143355	LHX9	Protein_Coding	Down-regulated	-1.36223	8.05e-06
ENSG00000172007	RAB33B	Protein_Coding	Up-regulated	1.51016	8.09e-06
ENSG00000189420	ZFP92	Protein_Coding	Up-regulated	1.63178	8.09e-06
ENSG00000204764	RANBP17	Protein_Coding	Down-regulated	-1.98668	8.34e-06
ENSG00000196476	C20orf96	Protein_Coding	Down-regulated	-1.54851	8.53e-06
ENSG00000178685	PARP10	Protein_Coding	Up-regulated	1.14213	8.54e-06
ENSG00000111674	ENO2	Protein_Coding	Down-regulated	-1.02699	8.61e-06
ENSG00000171608	PIK3CD	Protein_Coding	Up-regulated	1.03426	8.8e-06
ENSG00000165861	ZFYVE1	Protein_Coding	Up-regulated	1.03413	8.82e-06
ENSG00000267060	PTGES3L	Protein_Coding	Down-regulated	-2.44605	8.85e-06
ENSG00000138942	RNF185	Protein_Coding	Up-regulated	1.05918	8.96e-06
ENSG00000055044	NOP58	Protein_Coding	Down-regulated	-1.21813	8.98e-06
ENSG00000108091	CCDC6	Protein_Coding	Down-regulated	-1.30096	9.2e-06
ENSG00000126351	THRA	Protein_Coding	Down-regulated	-1.00106	9.32e-06
ENSG00000130940	CASZ1	Protein_Coding	Up-regulated	2.71575	9.52e-06
ENSG00000092036	HAUS4	Protein_Coding	Down-regulated	-1.82077	9.74e-06
ENSG00000136928	GABBR2	Protein_Coding	Up-regulated	1.71719	9.79e-06
ENSG00000162407	PLPP3	Protein_Coding	Up-regulated	1.0814	9.89e-06
ENSG00000186364	NUDT17	Protein_Coding	Down-regulated	-1.81493	9.9e-06
ENSG00000173546	CSPG4	Protein_Coding	Up-regulated	1.01769	9.91e-06
ENSG00000160218	TRAPPC10	Protein_Coding	Up-regulated	1.17248	1e-05
ENSG00000171606	ZNF274	Protein_Coding	Up-regulated	1.23771	1.03e-05
ENSG00000179846	NKPD1	Protein_Coding	Up-regulated	6.74032	1.03e-05
ENSG00000204366	ZBTB12	Protein_Coding	Down-regulated	-1.71476	1.04e-05
ENSG00000183621	ZNF438	Protein_Coding	Down-regulated	-1.69332	1.05e-05
ENSG00000106483	SFRP4	Protein_Coding	Up-regulated	6.74859	1.07e-05
ENSG00000253159	PCDHGA12	Protein_Coding	Up-regulated	1.35123	1.07e-05
ENSG00000175782	SLC35E3	Protein_Coding	Up-regulated	1.11733	1.08e-05
ENSG00000167083	GNGT2	Protein_Coding	Up-regulated	6.74861	1.09e-05
ENSG00000010803	SCMH1	Protein_Coding	Down-regulated	-1.24356	1.1e-05
ENSG00000285410	GABPB1-IT1	lncRNA	Up-regulated	1.13663	1.1e-05
ENSG00000263766	KPNB1-DT	lncRNA	Up-regulated	3.0849	1.12e-05
ENSG00000187634	SAMD11	Protein_Coding	Down-regulated	-1.17455	1.13e-05
ENSG00000170191	NANP	Protein_Coding	Up-regulated	1.4098	1.17e-05
ENSG00000177602	HASPIN	Protein_Coding	Down-regulated	-1.71682	1.17e-05
ENSG00000167861	HID1	Protein_Coding	Up-regulated	2.41378	1.18e-05
ENSG00000134291	TMEM106C	Protein_Coding	Down-regulated	-1.04304	1.2e-05
ENSG00000182575	NXPH3	Protein_Coding	Down-regulated	-1.10634	1.23e-05
ENSG00000163412	EIF4E3	Protein_Coding	Up-regulated	1.66442	1.25e-05
ENSG00000225746	MEG8	lncRNA	Down-regulated	-1.28924	1.25e-05
ENSG00000075303	SLC25A40	Protein_Coding	Down-regulated	-1.74879	1.26e-05
ENSG00000152256	PDK1	Protein_Coding	Down-regulated	-1.28113	1.28e-05
ENSG00000084733	RAB10	Protein_Coding	Down-regulated	-1.06612	1.29e-05
ENSG00000064999	ANKS1A	Protein_Coding	Up-regulated	1.25103	1.31e-05
ENSG00000080709	KCNN2	Protein_Coding	Down-regulated	-1.69439	1.31e-05
ENSG00000228223	HCG11	lncRNA	Down-regulated	-1.30254	1.32e-05
ENSG00000138002	IFT172	Protein_Coding	Down-regulated	-1.21902	1.33e-05
ENSG00000161860	SYCE2	Protein_Coding	Down-regulated	-3.00028	1.34e-05
ENSG00000184508	HDDC3	Protein_Coding	Down-regulated	-1.40706	1.34e-05
ENSG00000110400	NECTIN1	Protein_Coding	Up-regulated	1.12369	1.38e-05
ENSG00000233030	ENSG00000233030	lncRNA	Up-regulated	4.72256	1.38e-05
ENSG00000288961	ENSG00000288961	lncRNA	Up-regulated	2.08957	1.38e-05
ENSG00000069431	ABCC9	Protein_Coding	Up-regulated	1.94676	1.39e-05
ENSG00000166845	C18orf54	Protein_Coding	Down-regulated	-1.68685	1.44e-05
ENSG00000174233	ADCY6	Protein_Coding	Up-regulated	1.06968	1.44e-05
ENSG00000149596	JPH2	Protein_Coding	Down-regulated	-1.20308	1.48e-05
ENSG00000112304	ACOT13	Protein_Coding	Down-regulated	-1.10152	1.51e-05
ENSG00000229951	FOSL2-AS1	lncRNA	Up-regulated	2.44866	1.51e-05
ENSG00000198373	WWP2	Protein_Coding	Up-regulated	1.01281	1.52e-05
ENSG00000225655	ENSG00000225655	lncRNA	Up-regulated	6.69195	1.52e-05
ENSG00000026103	FAS	Protein_Coding	Up-regulated	1.29705	1.54e-05
ENSG00000175938	ORAI3	Protein_Coding	Up-regulated	1.29877	1.54e-05
ENSG00000197037	ZSCAN25	Protein_Coding	Up-regulated	1.22196	1.55e-05
ENSG00000213190	MLLT11	Protein_Coding	Down-regulated	-1.3994	1.55e-05
ENSG00000175745	NR2F1	Protein_Coding	Down-regulated	-1.07545	1.6e-05
ENSG00000176208	ATAD5	Protein_Coding	Down-regulated	-2.32916	1.63e-05
ENSG00000270194	GOLGA4-AS1	lncRNA	Up-regulated	2.04124	1.65e-05
ENSG00000136982	DSCC1	Protein_Coding	Down-regulated	-1.68235	1.66e-05
ENSG00000144231	POLR2D	Protein_Coding	Up-regulated	1.02429	1.68e-05
ENSG00000151067	CACNA1C	Protein_Coding	Down-regulated	-1.0641	1.71e-05
ENSG00000174032	SLC25A30	Protein_Coding	Up-regulated	1.21381	1.72e-05
ENSG00000105464	GRIN2D	Protein_Coding	Down-regulated	-1.52497	1.78e-05
ENSG00000248323	LUCAT1	lncRNA	Up-regulated	2.03555	1.78e-05
ENSG00000100916	BRMS1L	Protein_Coding	Up-regulated	1.41798	1.79e-05
ENSG00000178295	GEN1	Protein_Coding	Down-regulated	-2.14161	1.81e-05
ENSG00000204160	ZDHHC18	Protein_Coding	Down-regulated	-1.18977	1.82e-05
ENSG00000099822	HCN2	Protein_Coding	Up-regulated	1.41421	1.83e-05
ENSG00000029363	BCLAF1	Protein_Coding	Down-regulated	-1.30114	1.91e-05
ENSG00000224687	RASAL2-AS1	lncRNA	Up-regulated	1.80518	1.97e-05
ENSG00000127914	AKAP9	Protein_Coding	Down-regulated	-1.32503	1.98e-05
ENSG00000183111	ARHGEF37	Protein_Coding	Up-regulated	2.19367	2e-05
ENSG00000182628	SKA2	Protein_Coding	Down-regulated	-1.1847	2.01e-05
ENSG00000040731	CDH10	Protein_Coding	Up-regulated	6.67473	2.06e-05
ENSG00000187720	THSD4	Protein_Coding	Up-regulated	1.08599	2.06e-05
ENSG00000116675	DNAJC6	Protein_Coding	Up-regulated	1.25209	2.07e-05
ENSG00000141447	OSBPL1A	Protein_Coding	Up-regulated	1.16227	2.07e-05
ENSG00000153714	LURAP1L	Protein_Coding	Up-regulated	1.05467	2.07e-05
ENSG00000166106	ADAMTS15	Protein_Coding	Up-regulated	1.15633	2.07e-05
ENSG00000065923	SLC9A7	Protein_Coding	Up-regulated	1.13857	2.08e-05
ENSG00000160271	RALGDS	Protein_Coding	Up-regulated	1.29078	2.12e-05
ENSG00000253626	EIF5AL1	Protein_Coding	Down-regulated	-1.76462	2.12e-05
ENSG00000162777	DENND2D	Protein_Coding	Up-regulated	1.41219	2.14e-05
ENSG00000171408	PDE7B	Protein_Coding	Down-regulated	-2.06162	2.18e-05
ENSG00000151414	NEK7	Protein_Coding	Down-regulated	-1.00852	2.22e-05
ENSG00000133640	LRRIQ1	Protein_Coding	Down-regulated	-7.55863	2.23e-05
ENSG00000288852	ENSG00000288852	lncRNA	Up-regulated	1.84002	2.24e-05
ENSG00000103160	HSDL1	Protein_Coding	Up-regulated	1.12591	2.28e-05
ENSG00000104129	DNAJC17	Protein_Coding	Down-regulated	-1.1377	2.3e-05
ENSG00000163702	IL17RC	Protein_Coding	Down-regulated	-1.64468	2.31e-05
ENSG00000213445	SIPA1	Protein_Coding	Down-regulated	-1.29013	2.31e-05
ENSG00000196074	SYCP2	Protein_Coding	Down-regulated	-4.12933	2.33e-05
ENSG00000224043	CCNT2-AS1	lncRNA	Up-regulated	1.36537	2.34e-05
ENSG00000089472	HEPH	Protein_Coding	Up-regulated	1.77252	2.35e-05
ENSG00000142207	URB1	Protein_Coding	Up-regulated	1.02534	2.35e-05
ENSG00000140470	ADAMTS17	Protein_Coding	Up-regulated	6.64192	2.36e-05
ENSG00000175287	PHYHD1	Protein_Coding	Down-regulated	-1.36126	2.38e-05
ENSG00000232931	LINC00342	lncRNA	Down-regulated	-3.09627	2.38e-05
ENSG00000115652	UXS1	Protein_Coding	Up-regulated	1.05097	2.39e-05
ENSG00000105427	CNFN	Protein_Coding	Up-regulated	2.04665	2.47e-05
ENSG00000129355	CDKN2D	Protein_Coding	Down-regulated	-1.15894	2.51e-05
ENSG00000175352	NRIP3	Protein_Coding	Up-regulated	1.01832	2.67e-05
ENSG00000214708	ENSG00000214708	lncRNA	Up-regulated	2.17191	2.67e-05
ENSG00000092969	TGFB2	Protein_Coding	Up-regulated	1.05832	2.73e-05
ENSG00000188177	ZC3H6	Protein_Coding	Down-regulated	-1.23288	2.73e-05
ENSG00000104131	EIF3J	Protein_Coding	Down-regulated	-1.21219	2.76e-05
ENSG00000289615	ENSG00000289615	lncRNA	Up-regulated	6.62436	2.78e-05
ENSG00000140323	DISP2	Protein_Coding	Up-regulated	1.48653	2.79e-05
ENSG00000125378	BMP4	Protein_Coding	Up-regulated	1.16255	2.86e-05
ENSG00000228791	THRB-AS1	lncRNA	Up-regulated	3.30694	2.89e-05
ENSG00000153832	FBXO36	Protein_Coding	Down-regulated	-3.07168	2.94e-05
ENSG00000157625	TAB3	Protein_Coding	Up-regulated	1.29528	2.94e-05
ENSG00000229589	ACVR2B-AS1	lncRNA	Up-regulated	3.39239	2.94e-05
ENSG00000264672	SEPTIN4-AS1	lncRNA	Up-regulated	3.92858	2.94e-05
ENSG00000175040	CHST2	Protein_Coding	Up-regulated	1.09564	3.01e-05
ENSG00000246640	PICART1	lncRNA	Up-regulated	3.01998	3.01e-05
ENSG00000280594	BTG3-AS1	lncRNA	Up-regulated	2.4452	3.01e-05
ENSG00000126016	AMOT	Protein_Coding	Up-regulated	1.62303	3.02e-05
ENSG00000005810	MYCBP2	Protein_Coding	Down-regulated	-1.01659	3.06e-05
ENSG00000185480	PARPBP	Protein_Coding	Down-regulated	-1.79977	3.09e-05
ENSG00000104892	KLC3	Protein_Coding	Up-regulated	3.16885	3.17e-05
ENSG00000138347	MYPN	Protein_Coding	Down-regulated	-1.018	3.21e-05
ENSG00000147166	ITGB1BP2	Protein_Coding	Down-regulated	-3.93594	3.21e-05
ENSG00000064490	RFXANK	Protein_Coding	Down-regulated	-1.08754	3.24e-05
ENSG00000287091	ENSG00000287091	lncRNA	Up-regulated	3.83534	3.24e-05
ENSG00000106443	PHF14	Protein_Coding	Down-regulated	-1.03515	3.25e-05
ENSG00000082397	EPB41L3	Protein_Coding	Down-regulated	-1.07764	3.26e-05
ENSG00000136450	SRSF1	Protein_Coding	Down-regulated	-1.38973	3.26e-05
ENSG00000233822	H2BC15	Protein_Coding	Up-regulated	1.77983	3.26e-05
ENSG00000139505	MTMR6	Protein_Coding	Down-regulated	-1.20056	3.3e-05
ENSG00000276600	RAB7B	Protein_Coding	Up-regulated	1.36212	3.3e-05
ENSG00000125652	ALKBH7	Protein_Coding	Down-regulated	-1.20193	3.34e-05
ENSG00000088387	DOCK9	Protein_Coding	Up-regulated	1.13746	3.37e-05
ENSG00000150093	ITGB1	Protein_Coding	Up-regulated	1.09416	3.37e-05
ENSG00000184381	PLA2G6	Protein_Coding	Up-regulated	1.54844	3.37e-05
ENSG00000278899	ENSG00000278899	lncRNA	Up-regulated	2.86281	3.42e-05
ENSG00000108021	TASOR2	Protein_Coding	Up-regulated	1.04104	3.47e-05
ENSG00000250337	PURPL	lncRNA	Up-regulated	1.73933	3.48e-05
ENSG00000178467	P4HTM	Protein_Coding	Up-regulated	1.13211	3.5e-05
ENSG00000081019	RSBN1	Protein_Coding	Down-regulated	-1.33285	3.53e-05
ENSG00000144559	TAMM41	Protein_Coding	Down-regulated	-1.3263	3.6e-05
ENSG00000186777	ZNF732	Protein_Coding	Down-regulated	-6.49074	3.63e-05
ENSG00000132535	DLG4	Protein_Coding	Down-regulated	-1.00991	3.64e-05
ENSG00000104856	RELB	Protein_Coding	Up-regulated	1.13038	3.66e-05
ENSG00000180806	HOXC9	Protein_Coding	Down-regulated	-1.63987	3.68e-05
ENSG00000135090	TAOK3	Protein_Coding	Down-regulated	-1.03772	3.69e-05
ENSG00000173334	TRIB1	Protein_Coding	Up-regulated	1.01757	3.69e-05
ENSG00000239332	LINC01119	lncRNA	Up-regulated	1.19244	3.75e-05
ENSG00000258017	ENSG00000258017	lncRNA	Down-regulated	-2.04563	3.78e-05
ENSG00000101447	FAM83D	Protein_Coding	Down-regulated	-1.24895	3.84e-05
ENSG00000113441	LNPEP	Protein_Coding	Up-regulated	1.21091	3.84e-05
ENSG00000134072	CAMK1	Protein_Coding	Down-regulated	-1.1227	3.86e-05
ENSG00000225335	ENSG00000225335	lncRNA	Up-regulated	1.6462	3.9e-05
ENSG00000204666	ZNF473CR	lncRNA	Up-regulated	3.94955	3.92e-05
ENSG00000234380	LINC01426	lncRNA	Up-regulated	2.49384	3.92e-05
ENSG00000289291	ENSG00000289291	lncRNA	Up-regulated	2.64373	3.94e-05
ENSG00000169184	MN1	Protein_Coding	Up-regulated	1.17478	4.01e-05
ENSG00000106355	LSM5	Protein_Coding	Down-regulated	-1.08372	4.04e-05
ENSG00000102781	KATNAL1	Protein_Coding	Down-regulated	-1.0055	4.11e-05
ENSG00000130304	SLC27A1	Protein_Coding	Up-regulated	1.04951	4.11e-05
ENSG00000169756	LIMS1	Protein_Coding	Down-regulated	-1.00654	4.31e-05
ENSG00000077585	GPR137B	Protein_Coding	Up-regulated	1.01239	4.35e-05
ENSG00000122824	NUDT10	Protein_Coding	Up-regulated	6.56277	4.35e-05
ENSG00000183496	MEX3B	Protein_Coding	Up-regulated	1.61721	4.35e-05
ENSG00000236719	OVAAL	lncRNA	Up-regulated	6.56276	4.36e-05
ENSG00000146410	MTFR2	Protein_Coding	Down-regulated	-1.56721	4.4e-05
ENSG00000248371	LINC02056	lncRNA	Up-regulated	2.48971	4.46e-05
ENSG00000132561	MATN2	Protein_Coding	Up-regulated	1.29348	4.71e-05
ENSG00000166788	SAAL1	Protein_Coding	Down-regulated	-1.19644	4.71e-05
ENSG00000165879	FRAT1	Protein_Coding	Up-regulated	1.51157	4.76e-05
ENSG00000174640	SLCO2A1	Protein_Coding	Up-regulated	1.04138	4.88e-05
ENSG00000205302	SNX2	Protein_Coding	Up-regulated	1.09317	4.89e-05
ENSG00000169570	DTWD2	Protein_Coding	Down-regulated	-1.5081	5e-05
ENSG00000174514	MFSD4A	Protein_Coding	Up-regulated	3.54438	5e-05
ENSG00000198046	ZNF667	Protein_Coding	Up-regulated	1.42995	5.1e-05
ENSG00000172350	ABCG4	Protein_Coding	Up-regulated	2.31159	5.13e-05
ENSG00000262265	ENSG00000262265	lncRNA	Down-regulated	-2.86377	5.23e-05
ENSG00000113196	HAND1	Protein_Coding	Up-regulated	6.67313	5.29e-05
ENSG00000272831	ENSG00000272831	lncRNA	Up-regulated	1.27104	5.35e-05
ENSG00000169242	EFNA1	Protein_Coding	Up-regulated	3.1369	5.45e-05
ENSG00000277196	PRODH	Protein_Coding	Up-regulated	6.80195	5.49e-05
ENSG00000139410	SDSL	Protein_Coding	Up-regulated	1.21254	5.54e-05
ENSG00000267365	KCNJ2-AS1	lncRNA	Up-regulated	2.30841	5.54e-05
ENSG00000154237	LRRK1	Protein_Coding	Down-regulated	-1.32689	5.55e-05
ENSG00000112312	GMNN	Protein_Coding	Down-regulated	-1.06579	5.56e-05
ENSG00000249673	NOP14-AS1	lncRNA	Up-regulated	1.12995	5.58e-05
ENSG00000277161	PIGW	Protein_Coding	Up-regulated	1.0956	5.59e-05
ENSG00000163918	RFC4	Protein_Coding	Down-regulated	-1.08968	5.61e-05
ENSG00000003989	SLC7A2	Protein_Coding	Up-regulated	3.08486	5.68e-05
ENSG00000143217	NECTIN4	Protein_Coding	Up-regulated	4.53101	5.7e-05
ENSG00000084093	REST	Protein_Coding	Down-regulated	-1.08853	5.72e-05
ENSG00000226571	ENSG00000226571	lncRNA	Up-regulated	3.25438	5.72e-05
ENSG00000165821	SALL2	Protein_Coding	Up-regulated	1.48393	5.74e-05
ENSG00000250041	ENSG00000250041	lncRNA	Up-regulated	3.25439	5.75e-05
ENSG00000188610	FAM72B	Protein_Coding	Down-regulated	-3.96991	5.76e-05
ENSG00000268996	MAN1B1-DT	lncRNA	Up-regulated	1.34214	5.78e-05
ENSG00000133773	CCDC59	Protein_Coding	Down-regulated	-1.05069	5.79e-05
ENSG00000247679	ENSG00000247679	lncRNA	Up-regulated	2.04672	5.8e-05
ENSG00000092445	TYRO3	Protein_Coding	Down-regulated	-1.06766	6.05e-05
ENSG00000133119	RFC3	Protein_Coding	Down-regulated	-1.19781	6.14e-05
ENSG00000224048	LINC02612	lncRNA	Up-regulated	6.61138	6.14e-05
ENSG00000230798	FOXD3-AS1	lncRNA	Up-regulated	6.61138	6.14e-05
ENSG00000163565	IFI16	Protein_Coding	Down-regulated	-1.05961	6.33e-05
ENSG00000230551	ENSG00000230551	lncRNA	Down-regulated	-1.26264	6.33e-05
ENSG00000289942	ENSG00000289942	lncRNA	Down-regulated	-3.90434	6.41e-05
ENSG00000075945	KIFAP3	Protein_Coding	Down-regulated	-1.05388	6.42e-05
ENSG00000163686	ABHD6	Protein_Coding	Up-regulated	1.02168	6.44e-05
ENSG00000131620	ANO1	Protein_Coding	Up-regulated	4.49611	6.52e-05
ENSG00000159784	FAM131B	Protein_Coding	Up-regulated	1.72974	6.57e-05
ENSG00000032219	ARID4A	Protein_Coding	Down-regulated	-1.54282	6.69e-05
ENSG00000225138	SLC9A3-AS1	lncRNA	Up-regulated	1.15726	6.71e-05
ENSG00000049192	ADAMTS6	Protein_Coding	Down-regulated	-1.22649	6.77e-05
ENSG00000120784	ZFP30	Protein_Coding	Down-regulated	-1.6078	6.77e-05
ENSG00000097046	CDC7	Protein_Coding	Down-regulated	-1.70498	6.84e-05
ENSG00000186469	GNG2	Protein_Coding	Down-regulated	-1.04774	6.92e-05
ENSG00000178764	ZHX2	Protein_Coding	Up-regulated	1.1007	7.03e-05
ENSG00000135407	AVIL	Protein_Coding	Down-regulated	-1.97767	7.04e-05
ENSG00000289190	ENSG00000289190	lncRNA	Up-regulated	2.58027	7.14e-05
ENSG00000196912	ANKRD36B	Protein_Coding	Down-regulated	-3.47108	7.25e-05
ENSG00000103494	RPGRIP1L	Protein_Coding	Down-regulated	-1.29616	7.3e-05
ENSG00000117155	SSX2IP	Protein_Coding	Down-regulated	-1.08383	7.58e-05
ENSG00000125351	UPF3B	Protein_Coding	Down-regulated	-1.31256	7.65e-05
ENSG00000125675	GRIA3	Protein_Coding	Up-regulated	1.04484	7.65e-05
ENSG00000163637	PRICKLE2	Protein_Coding	Up-regulated	1.05189	7.67e-05
ENSG00000049130	KITLG	Protein_Coding	Up-regulated	1.04957	7.69e-05
ENSG00000068137	PLEKHH3	Protein_Coding	Down-regulated	-1.22212	7.78e-05
ENSG00000180287	PLD5	Protein_Coding	Up-regulated	6.46079	7.78e-05
ENSG00000287335	ENSG00000287335	lncRNA	Up-regulated	1.64496	7.79e-05
ENSG00000109929	SC5D	Protein_Coding	Up-regulated	1.24975	7.8e-05
ENSG00000144048	DUSP11	Protein_Coding	Up-regulated	1.07839	7.9e-05
ENSG00000184185	KCNJ12	Protein_Coding	Up-regulated	3.69553	7.93e-05
ENSG00000206417	H1-10-AS1	lncRNA	Down-regulated	-1.26805	7.99e-05
ENSG00000139973	SYT16	Protein_Coding	Up-regulated	1.96202	8.08e-05
ENSG00000270076	ENSG00000270076	lncRNA	Up-regulated	6.47047	8.08e-05
ENSG00000291224	ENSG00000291224	lncRNA	Down-regulated	-1.81351	8.08e-05
ENSG00000125485	DDX31	Protein_Coding	Up-regulated	1.04214	8.18e-05
ENSG00000157005	SST	Protein_Coding	Up-regulated	1.36556	8.2e-05
ENSG00000113578	FGF1	Protein_Coding	Down-regulated	-1.15419	8.33e-05
ENSG00000109927	TECTA	Protein_Coding	Up-regulated	3.11378	8.54e-05
ENSG00000139132	FGD4	Protein_Coding	Up-regulated	1.20373	8.55e-05
ENSG00000188277	C15orf62	Protein_Coding	Up-regulated	3.81916	8.55e-05
ENSG00000256802	ENSG00000256802	lncRNA	Up-regulated	1.94029	8.7e-05
ENSG00000119636	BBOF1	Protein_Coding	Down-regulated	-2.28937	8.73e-05
ENSG00000138658	ZGRF1	Protein_Coding	Down-regulated	-2.06872	8.75e-05
ENSG00000121957	GPSM2	Protein_Coding	Down-regulated	-1.16633	8.82e-05
ENSG00000163564	PYHIN1	Protein_Coding	Up-regulated	6.45117	8.87e-05
ENSG00000150776	NKAPD1	Protein_Coding	Down-regulated	-1.01173	8.98e-05
ENSG00000169903	TM4SF4	Protein_Coding	Up-regulated	2.84622	8.98e-05
ENSG00000251602	MTA1-DT	lncRNA	Down-regulated	-1.70241	8.98e-05
ENSG00000103249	CLCN7	Protein_Coding	Up-regulated	1.00659	9.16e-05
ENSG00000228526	MIR34AHG	lncRNA	Up-regulated	1.4441	9.44e-05
ENSG00000284753	EEF1AKMT4	Protein_Coding	Up-regulated	1.29197	9.47e-05
ENSG00000179743	SPEN-AS1	lncRNA	Up-regulated	1.35037	9.59e-05
ENSG00000254535	PABPC4L	Protein_Coding	Down-regulated	-1.33631	9.67e-05
ENSG00000114770	ABCC5	Protein_Coding	Up-regulated	1.08909	9.77e-05
ENSG00000183873	SCN5A	Protein_Coding	Up-regulated	1.42411	9.89e-05
ENSG00000261183	SPINT1-AS1	lncRNA	Up-regulated	6.48118	0.0001
ENSG00000134698	AGO4	Protein_Coding	Down-regulated	-1.18231	0.000100133
ENSG00000113319	RASGRF2	Protein_Coding	Up-regulated	1.29644	0.000100535
ENSG00000147592	LACTB2	Protein_Coding	Up-regulated	1.20407	0.000100535
ENSG00000164715	LMTK2	Protein_Coding	Up-regulated	1.04541	0.000101901
ENSG00000183784	DOCK8-AS1	lncRNA	Up-regulated	3.81937	0.000102862
ENSG00000198246	SLC29A3	Protein_Coding	Up-regulated	1.0289	0.000103441
ENSG00000104218	CSPP1	Protein_Coding	Down-regulated	-1.04179	0.000104136
ENSG00000198885	ITPRIPL1	Protein_Coding	Down-regulated	-1.89283	0.000105334
ENSG00000172061	LRRC15	Protein_Coding	Down-regulated	-1.08771	0.000105608
ENSG00000225555	ENSG00000225555	lncRNA	Up-regulated	3.62299	0.000106819
ENSG00000107672	NSMCE4A	Protein_Coding	Down-regulated	-1.10159	0.000107225
ENSG00000285278	TFAP2A-AS2	lncRNA	Up-regulated	1.81588	0.00010939
ENSG00000236671	PRKG1-AS1	lncRNA	Up-regulated	1.56355	0.00011095
ENSG00000173581	CCDC106	Protein_Coding	Down-regulated	-1.10991	0.000111581
ENSG00000103021	CCDC113	Protein_Coding	Down-regulated	-1.63882	0.000111851
ENSG00000152689	RASGRP3	Protein_Coding	Down-regulated	-1.45669	0.000112667
ENSG00000169247	SH3TC2	Protein_Coding	Down-regulated	-1.43367	0.000113272
ENSG00000092140	G2E3	Protein_Coding	Down-regulated	-1.51388	0.000114578
ENSG00000137103	TMEM8B	Protein_Coding	Up-regulated	1.0728	0.000114919
ENSG00000205903	ZNF316	Protein_Coding	Up-regulated	1.01453	0.000115081
ENSG00000155893	PXYLP1	Protein_Coding	Up-regulated	1.34756	0.00011574
ENSG00000050438	SLC4A8	Protein_Coding	Down-regulated	-1.38682	0.000116112
ENSG00000273230	ENSG00000273230	lncRNA	Up-regulated	1.67921	0.000116112
ENSG00000147853	AK3	Protein_Coding	Up-regulated	1.05576	0.000116419
ENSG00000163909	HEYL	Protein_Coding	Down-regulated	-2.07878	0.000117364
ENSG00000133027	PEMT	Protein_Coding	Down-regulated	-1.01689	0.000118063
ENSG00000259877	ZNF778-DT	lncRNA	Up-regulated	1.55182	0.00011872
ENSG00000105963	ADAP1	Protein_Coding	Down-regulated	-2.29124	0.000119312
ENSG00000106462	EZH2	Protein_Coding	Down-regulated	-1.09254	0.00011956
ENSG00000170075	GPR37L1	Protein_Coding	Up-regulated	6.44064	0.000119614
ENSG00000162511	LAPTM5	Protein_Coding	Up-regulated	2.05814	0.000119649
ENSG00000145390	USP53	Protein_Coding	Down-regulated	-1.04037	0.000119655
ENSG00000099338	CATSPERG	Protein_Coding	Up-regulated	2.76481	0.000122021
ENSG00000159147	DONSON	Protein_Coding	Down-regulated	-1.19165	0.00012266
ENSG00000260001	TGFBR3L	Protein_Coding	Down-regulated	-1.25313	0.00012316
ENSG00000066422	ZBTB11	Protein_Coding	Up-regulated	1.19323	0.000123547
ENSG00000167302	TEPSIN	Protein_Coding	Up-regulated	1.1946	0.000123804
ENSG00000289971	ENSG00000289971	lncRNA	Up-regulated	2.81445	0.000124061
ENSG00000128567	PODXL	Protein_Coding	Down-regulated	-1.20293	0.000124453
ENSG00000135540	NHSL1	Protein_Coding	Up-regulated	1.07855	0.000125272
ENSG00000182013	PNMA8A	Protein_Coding	Up-regulated	1.30023	0.000126555
ENSG00000164172	MOCS2	Protein_Coding	Down-regulated	-1.15875	0.000127468
ENSG00000174501	ANKRD36C	Protein_Coding	Down-regulated	-2.72856	0.000132916
ENSG00000174460	ZCCHC12	Protein_Coding	Up-regulated	6.49336	0.000137128
ENSG00000180263	FGD6	Protein_Coding	Down-regulated	-1.41186	0.000138088
ENSG00000186951	PPARA	Protein_Coding	Down-regulated	-1.02358	0.000140519
ENSG00000281376	ABALON	lncRNA	Up-regulated	2.81422	0.000140773
ENSG00000181544	FANCB	Protein_Coding	Down-regulated	-1.97675	0.000141285
ENSG00000167178	ISLR2	Protein_Coding	Up-regulated	2.35766	0.000144097
ENSG00000165501	LRR1	Protein_Coding	Down-regulated	-1.22261	0.000144196
ENSG00000157193	LRP8	Protein_Coding	Down-regulated	-1.46394	0.000147891
ENSG00000154642	C21orf91	Protein_Coding	Up-regulated	1.38543	0.000149417
ENSG00000166289	PLEKHF1	Protein_Coding	Up-regulated	1.38436	0.000152663
ENSG00000138592	USP8	Protein_Coding	Down-regulated	-1.11126	0.000153135
ENSG00000109472	CPE	Protein_Coding	Up-regulated	2.71133	0.000153824
ENSG00000104888	SLC17A7	Protein_Coding	Up-regulated	2.97349	0.000154184
ENSG00000235863	B3GALT4	Protein_Coding	Down-regulated	-1.52701	0.000154214
ENSG00000182511	FES	Protein_Coding	Down-regulated	-1.5188	0.000154541
ENSG00000196924	FLNA	Protein_Coding	Up-regulated	1.10481	0.000157444
ENSG00000133985	TTC9	Protein_Coding	Up-regulated	1.46873	0.000158907
ENSG00000167080	B4GALNT2	Protein_Coding	Up-regulated	2.78699	0.000159521
ENSG00000179165	PXT1	Protein_Coding	Up-regulated	6.32973	0.000160446
ENSG00000165704	HPRT1	Protein_Coding	Down-regulated	-1.25346	0.000160736
ENSG00000267080	ASB16-AS1	lncRNA	Up-regulated	1.06194	0.000161883
ENSG00000138411	HECW2	Protein_Coding	Down-regulated	-1.20089	0.000162543
ENSG00000119862	LGALSL	Protein_Coding	Up-regulated	1.38691	0.000163046
ENSG00000067191	CACNB1	Protein_Coding	Down-regulated	-1.61555	0.000164536
ENSG00000174842	GLMN	Protein_Coding	Down-regulated	-1.56405	0.000165617
ENSG00000175643	RMI2	Protein_Coding	Down-regulated	-1.3531	0.000166223
ENSG00000159685	CHCHD6	Protein_Coding	Down-regulated	-1.28364	0.000166283
ENSG00000176842	IRX5	Protein_Coding	Up-regulated	1.03967	0.000166569
ENSG00000106327	TFR2	Protein_Coding	Down-regulated	-1.71553	0.000166719
ENSG00000153721	CNKSR3	Protein_Coding	Down-regulated	-1.45933	0.000167629
ENSG00000085224	ATRX	Protein_Coding	Down-regulated	-1.25304	0.000167711
ENSG00000079215	SLC1A3	Protein_Coding	Up-regulated	2.65532	0.000168422
ENSG00000163462	TRIM46	Protein_Coding	Down-regulated	-1.56944	0.000168925
ENSG00000170085	SIMC1	Protein_Coding	Down-regulated	-1.23303	0.000169966
ENSG00000101745	ANKRD12	Protein_Coding	Down-regulated	-1.80948	0.000170098
ENSG00000243701	DUBR	lncRNA	Up-regulated	1.22376	0.000170098
ENSG00000215784	FAM72D	Protein_Coding	Down-regulated	-6.66342	0.000171651
ENSG00000071242	RPS6KA2	Protein_Coding	Down-regulated	-1.00752	0.000174849
ENSG00000122483	CCDC18	Protein_Coding	Down-regulated	-1.82549	0.000175657
ENSG00000185761	ADAMTSL5	Protein_Coding	Down-regulated	-1.06952	0.000176092
ENSG00000055332	EIF2AK2	Protein_Coding	Down-regulated	-1.11639	0.000176885
ENSG00000198691	ABCA4	Protein_Coding	Up-regulated	1.99481	0.000176885
ENSG00000130045	NXNL2	Protein_Coding	Up-regulated	1.30193	0.000177719
ENSG00000153574	RPIA	Protein_Coding	Up-regulated	1.0164	0.000178787
ENSG00000165943	MOAP1	Protein_Coding	Up-regulated	1.0746	0.00017899
ENSG00000177096	PHETA2	Protein_Coding	Down-regulated	-1.01005	0.00018152
ENSG00000139354	GAS2L3	Protein_Coding	Down-regulated	-1.56731	0.000182365
ENSG00000170276	HSPB2	Protein_Coding	Down-regulated	-2.16655	0.000183105
ENSG00000277369	ENSG00000277369	lncRNA	Up-regulated	2.15435	0.000185868
ENSG00000161267	BDH1	Protein_Coding	Down-regulated	-1.61434	0.000186373
ENSG00000137868	STRA6	Protein_Coding	Up-regulated	1.02657	0.000187104
ENSG00000138814	PPP3CA	Protein_Coding	Down-regulated	-1.145	0.000190672
ENSG00000031691	CENPQ	Protein_Coding	Down-regulated	-2.03528	0.000190706
ENSG00000248964	ENSG00000248964	lncRNA	Up-regulated	3.3853	0.000191056
ENSG00000135541	AHI1	Protein_Coding	Down-regulated	-1.37176	0.000192474
ENSG00000175279	CENPS	Protein_Coding	Down-regulated	-2.10143	0.000193982
ENSG00000221990	EXOC3-AS1	lncRNA	Up-regulated	1.57539	0.000198883
ENSG00000155330	C16orf87	Protein_Coding	Up-regulated	1.06556	0.000199502
ENSG00000228300	FAM174C	Protein_Coding	Down-regulated	-1.05615	0.000200574
ENSG00000115828	QPCT	Protein_Coding	Up-regulated	1.23439	0.000200817
ENSG00000158163	DZIP1L	Protein_Coding	Down-regulated	-1.31066	0.000202088
ENSG00000131944	FAAP24	Protein_Coding	Down-regulated	-1.14572	0.000203672
ENSG00000259178	ENSG00000259178	lncRNA	Up-regulated	6.37	0.000203848
ENSG00000274828	ENSG00000274828	lncRNA	Up-regulated	1.4073	0.000204624
ENSG00000115325	DOK1	Protein_Coding	Down-regulated	-1.04118	0.000206441
ENSG00000134343	ANO3	Protein_Coding	Down-regulated	-1.71561	0.000208777
ENSG00000137941	TTLL7	Protein_Coding	Down-regulated	-1.27867	0.000209683
ENSG00000155256	ZFYVE27	Protein_Coding	Up-regulated	1.05447	0.000210481
ENSG00000169855	ROBO1	Protein_Coding	Up-regulated	1.08335	0.000212295
ENSG00000078401	EDN1	Protein_Coding	Down-regulated	-1.14692	0.000214144
ENSG00000182983	ZNF662	Protein_Coding	Down-regulated	-2.87195	0.000215533
ENSG00000162631	NTNG1	Protein_Coding	Down-regulated	-1.37368	0.00021864
ENSG00000151233	GXYLT1	Protein_Coding	Up-regulated	1.14452	0.000222824
ENSG00000277157	H4C4	Protein_Coding	Up-regulated	2.5797	0.000225835
[truncated: 1,097 more rows]

## Sheet: Table_S3
Supplementary Table S3. List of differentially expressed protein-coding and lncRNA genes in DOX-treated cells compared to the control (HFFs with CRISPR-mediated p130 knockout and siRNA-mediated p107 knockdown cells (GSE135842).
Ensembl_ID	Gene_symbol	Biotype	Expression	logFC	FDR
ENSG00000065320	NTN1	Protein_Coding	Up-regulated	6.26427	3.79e-29
ENSG00000185668	POU3F1	Protein_Coding	Up-regulated	7.67411	3.79e-29
ENSG00000137975	CLCA2	Protein_Coding	Up-regulated	6.95866	2.8e-26
ENSG00000128510	CPA4	Protein_Coding	Up-regulated	5.23756	8.83e-26
ENSG00000148773	MKI67	Protein_Coding	Down-regulated	-4.91276	8.83e-26
ENSG00000100867	DHRS2	Protein_Coding	Up-regulated	5.64052	5.28e-25
ENSG00000069812	HES2	Protein_Coding	Up-regulated	7.25669	1.01e-23
ENSG00000135423	GLS2	Protein_Coding	Up-regulated	10.8987	1.31e-23
ENSG00000278828	H3C10	Protein_Coding	Up-regulated	5.63334	1.41e-23
ENSG00000151640	DPYSL4	Protein_Coding	Up-regulated	4.52673	1.82e-23
ENSG00000282988	ENSG00000282988	Protein_Coding	Up-regulated	6.44212	2.15e-22
ENSG00000158055	GRHL3	Protein_Coding	Up-regulated	7.33398	3.01e-22
ENSG00000130066	SAT1	Protein_Coding	Up-regulated	3.71603	2.11e-21
ENSG00000158406	H4C8	Protein_Coding	Up-regulated	4.64386	4.39e-21
ENSG00000248429	GASK1B-AS1	lncRNA	Up-regulated	5.52974	4.39e-21
ENSG00000068489	PRR11	Protein_Coding	Down-regulated	-3.84165	6.01e-21
ENSG00000159251	ACTC1	Protein_Coding	Down-regulated	-3.80643	1.01e-20
ENSG00000103044	HAS3	Protein_Coding	Up-regulated	4.70828	1.11e-20
ENSG00000171848	RRM2	Protein_Coding	Down-regulated	-3.9442	1.18e-20
ENSG00000142619	PADI3	Protein_Coding	Up-regulated	10.2081	1.73e-20
ENSG00000166851	PLK1	Protein_Coding	Down-regulated	-4.18644	1.9e-20
ENSG00000055163	CYFIP2	Protein_Coding	Up-regulated	3.58845	3.89e-20
ENSG00000162981	LRATD1	Protein_Coding	Up-regulated	9.8951	5.46e-20
ENSG00000164125	GASK1B	Protein_Coding	Up-regulated	4.54384	2.3e-19
ENSG00000277075	H2AC8	Protein_Coding	Up-regulated	5.44602	2.67e-19
ENSG00000272468	ENSG00000272468	lncRNA	Up-regulated	4.8044	3.22e-19
ENSG00000152253	SPC25	Protein_Coding	Down-regulated	-5.17514	4.39e-19
ENSG00000179163	FUCA1	Protein_Coding	Up-regulated	3.46423	8.89e-19
ENSG00000198074	AKR1B10	Protein_Coding	Up-regulated	4.88883	1.16e-18
ENSG00000092853	CLSPN	Protein_Coding	Down-regulated	-4.02223	1.21e-18
ENSG00000124635	H2BC11	Protein_Coding	Up-regulated	4.47596	1.21e-18
ENSG00000175063	UBE2C	Protein_Coding	Down-regulated	-3.7718	3.7e-18
ENSG00000148541	FAM13C	Protein_Coding	Up-regulated	7.6402	4.39e-18
ENSG00000166592	RRAD	Protein_Coding	Up-regulated	5.06774	8.6e-18
ENSG00000144452	ABCA12	Protein_Coding	Up-regulated	6.51089	5.17e-17
ENSG00000121552	CSTA	Protein_Coding	Up-regulated	5.87428	6.6e-17
ENSG00000180596	H2BC4	Protein_Coding	Up-regulated	4.52816	7.74e-17
ENSG00000273802	H2BC8	Protein_Coding	Up-regulated	5.02551	7.74e-17
ENSG00000277586	NEFL	Protein_Coding	Up-regulated	5.61325	2.02e-16
ENSG00000164104	HMGB2	Protein_Coding	Down-regulated	-3.05809	3.79e-16
ENSG00000161642	ZNF385A	Protein_Coding	Up-regulated	3.10741	6.79e-16
ENSG00000168621	GDNF	Protein_Coding	Up-regulated	3.93207	8.23e-16
ENSG00000180573	H2AC6	Protein_Coding	Up-regulated	3.70475	8.23e-16
ENSG00000183856	IQGAP3	Protein_Coding	Down-regulated	-3.48456	9.61e-16
ENSG00000148357	HMCN2	Protein_Coding	Up-regulated	9.62013	2.49e-15
ENSG00000106484	MEST	Protein_Coding	Up-regulated	4.0714	2.78e-15
ENSG00000112984	KIF20A	Protein_Coding	Down-regulated	-3.46926	2.94e-15
ENSG00000062038	CDH3	Protein_Coding	Up-regulated	4.49429	6.74e-15
ENSG00000187837	H1-2	Protein_Coding	Up-regulated	3.42553	6.74e-15
ENSG00000187017	ESPN	Protein_Coding	Up-regulated	7.48201	7.95e-15
ENSG00000197971	MBP	Protein_Coding	Up-regulated	5.29025	9.51e-15
ENSG00000188916	INSYN2A	Protein_Coding	Up-regulated	4.82088	9.79e-15
ENSG00000003137	CYP26B1	Protein_Coding	Up-regulated	3.90503	1.03e-14
ENSG00000237649	KIFC1	Protein_Coding	Down-regulated	-3.63203	1.08e-14
ENSG00000223573	TINCR	Protein_Coding	Up-regulated	4.35213	1.36e-14
ENSG00000276043	UHRF1	Protein_Coding	Down-regulated	-4.25313	1.42e-14
ENSG00000115129	TP53I3	Protein_Coding	Up-regulated	3.52264	1.5e-14
ENSG00000159388	BTG2	Protein_Coding	Up-regulated	3.12096	2.06e-14
ENSG00000168497	CAVIN2	Protein_Coding	Up-regulated	3.3988	2.25e-14
ENSG00000090776	EFNB1	Protein_Coding	Up-regulated	3.56181	3.72e-14
ENSG00000178999	AURKB	Protein_Coding	Down-regulated	-4.34914	3.8e-14
ENSG00000168824	NSG1	Protein_Coding	Up-regulated	7.23978	5.63e-14
ENSG00000283064	ENSG00000283064	lncRNA	Up-regulated	9.0405	7.55e-14
ENSG00000140022	STON2	Protein_Coding	Up-regulated	4.42308	7.98e-14
ENSG00000158769	F11R	Protein_Coding	Up-regulated	3.74728	1.02e-13
ENSG00000196787	H2AC11	Protein_Coding	Up-regulated	4.22257	1.05e-13
ENSG00000177098	SCN4B	Protein_Coding	Up-regulated	6.10371	1.2e-13
ENSG00000077152	UBE2T	Protein_Coding	Down-regulated	-3.71101	1.34e-13
ENSG00000168672	LRATD2	Protein_Coding	Up-regulated	3.69639	1.78e-13
ENSG00000186185	KIF18B	Protein_Coding	Down-regulated	-4.31002	1.78e-13
ENSG00000087085	ACHE	Protein_Coding	Up-regulated	4.21643	2.63e-13
ENSG00000260912	ENSG00000260912	lncRNA	Up-regulated	3.95788	2.63e-13
ENSG00000265096	C1QTNF1-AS1	lncRNA	Up-regulated	4.93288	3.57e-13
ENSG00000158373	H2BC5	Protein_Coding	Up-regulated	2.97282	4.13e-13
ENSG00000125538	IL1B	Protein_Coding	Up-regulated	2.72234	5.16e-13
ENSG00000165272	AQP3	Protein_Coding	Up-regulated	3.89203	5.21e-13
ENSG00000027869	SH2D2A	Protein_Coding	Up-regulated	4.86595	5.24e-13
ENSG00000089685	BIRC5	Protein_Coding	Down-regulated	-3.18074	6.37e-13
ENSG00000290792	ENSG00000290792	lncRNA	Up-regulated	3.97051	8.37e-13
ENSG00000128422	KRT17	Protein_Coding	Up-regulated	3.14885	2.03e-12
ENSG00000166803	PCLAF	Protein_Coding	Down-regulated	-3.72323	2.16e-12
ENSG00000257953	ENSG00000257953	lncRNA	Up-regulated	4.9893	2.34e-12
ENSG00000189057	FAM111B	Protein_Coding	Down-regulated	-5.29356	2.46e-12
ENSG00000116299	ELAPOR1	Protein_Coding	Up-regulated	3.73798	2.98e-12
ENSG00000173535	TNFRSF10C	Protein_Coding	Up-regulated	3.6556	3.56e-12
ENSG00000065328	MCM10	Protein_Coding	Down-regulated	-3.93304	4.26e-12
ENSG00000224592	MIR3659HG	lncRNA	Up-regulated	8.90166	4.6e-12
ENSG00000080986	NDC80	Protein_Coding	Down-regulated	-3.39474	5.49e-12
ENSG00000111665	CDCA3	Protein_Coding	Down-regulated	-3.62303	7.16e-12
ENSG00000196562	SULF2	Protein_Coding	Up-regulated	2.56823	7.76e-12
ENSG00000131747	TOP2A	Protein_Coding	Down-regulated	-2.99422	9.28e-12
ENSG00000172828	CES3	Protein_Coding	Up-regulated	5.58029	1.11e-11
ENSG00000159212	CLIC6	Protein_Coding	Up-regulated	4.33158	1.15e-11
ENSG00000110900	TSPAN11	Protein_Coding	Up-regulated	2.9043	1.38e-11
ENSG00000101230	ISM1	Protein_Coding	Up-regulated	3.82378	1.58e-11
ENSG00000115163	CENPA	Protein_Coding	Down-regulated	-3.6311	1.84e-11
ENSG00000171241	SHCBP1	Protein_Coding	Down-regulated	-3.18205	1.97e-11
ENSG00000162643	DNAI3	Protein_Coding	Up-regulated	3.42193	1.98e-11
ENSG00000007968	E2F2	Protein_Coding	Down-regulated	-5.41972	2.38e-11
ENSG00000080546	SESN1	Protein_Coding	Up-regulated	2.76263	2.38e-11
ENSG00000172508	CARNS1	Protein_Coding	Up-regulated	8.81169	2.38e-11
ENSG00000265763	ZNF488	Protein_Coding	Up-regulated	3.41836	2.38e-11
ENSG00000141052	MYOCD	Protein_Coding	Down-regulated	-3.04871	2.45e-11
ENSG00000143816	WNT9A	Protein_Coding	Up-regulated	3.62514	2.45e-11
ENSG00000213347	MXD3	Protein_Coding	Down-regulated	-3.52653	2.45e-11
ENSG00000184678	H2BC21	Protein_Coding	Up-regulated	3.00059	2.69e-11
ENSG00000196747	H2AC13	Protein_Coding	Up-regulated	5.28337	2.69e-11
ENSG00000115884	SDC1	Protein_Coding	Up-regulated	2.91972	3.16e-11
ENSG00000100167	SEPTIN3	Protein_Coding	Up-regulated	4.16688	3.39e-11
ENSG00000289426	ENSG00000289426	lncRNA	Up-regulated	8.66078	3.71e-11
ENSG00000290791	ENSG00000290791	lncRNA	Up-regulated	3.41597	3.71e-11
ENSG00000127528	KLF2	Protein_Coding	Down-regulated	-2.96935	4.3e-11
ENSG00000146006	LRRTM2	Protein_Coding	Up-regulated	5.46573	5.31e-11
ENSG00000224294	PINCR	lncRNA	Up-regulated	5.2337	5.86e-11
ENSG00000104689	TNFRSF10A	Protein_Coding	Up-regulated	2.84098	8.74e-11
ENSG00000050555	LAMC3	Protein_Coding	Up-regulated	4.84415	9.89e-11
ENSG00000162063	CCNF	Protein_Coding	Down-regulated	-3.16749	1.13e-10
ENSG00000205426	KRT81	Protein_Coding	Down-regulated	-2.98445	1.18e-10
ENSG00000178184	PARD6G	Protein_Coding	Up-regulated	3.18247	1.23e-10
ENSG00000164070	HSPA4L	Protein_Coding	Up-regulated	3.7206	1.25e-10
ENSG00000092068	SLC7A8	Protein_Coding	Up-regulated	2.44269	1.28e-10
ENSG00000166897	ELFN2	Protein_Coding	Up-regulated	2.75262	1.41e-10
ENSG00000089486	CDIP1	Protein_Coding	Up-regulated	2.67924	1.5e-10
ENSG00000101144	BMP7	Protein_Coding	Up-regulated	6.40419	1.72e-10
ENSG00000167513	CDT1	Protein_Coding	Down-regulated	-3.13146	1.77e-10
ENSG00000257167	TMPO-AS1	lncRNA	Down-regulated	-3.64521	1.95e-10
ENSG00000108947	EFNB3	Protein_Coding	Down-regulated	-3.7578	2.07e-10
ENSG00000078237	TIGAR	Protein_Coding	Up-regulated	2.90226	2.11e-10
ENSG00000126787	DLGAP5	Protein_Coding	Down-regulated	-3.594	2.5e-10
ENSG00000178150	ZNF114	Protein_Coding	Up-regulated	4.00238	2.5e-10
ENSG00000182253	SYNM	Protein_Coding	Up-regulated	2.96861	2.74e-10
ENSG00000161513	FDXR	Protein_Coding	Up-regulated	3.18766	2.99e-10
ENSG00000167992	VWCE	Protein_Coding	Up-regulated	3.58375	2.99e-10
ENSG00000163564	PYHIN1	Protein_Coding	Up-regulated	8.58698	3.53e-10
ENSG00000120875	DUSP4	Protein_Coding	Up-regulated	2.46747	4.02e-10
ENSG00000154040	CABYR	Protein_Coding	Up-regulated	2.78436	5.24e-10
ENSG00000188486	H2AX	Protein_Coding	Down-regulated	-2.48348	5.3e-10
ENSG00000166145	SPINT1	Protein_Coding	Up-regulated	3.54351	5.57e-10
ENSG00000120278	PLEKHG1	Protein_Coding	Up-regulated	4.38655	5.69e-10
ENSG00000128342	LIF	Protein_Coding	Up-regulated	3.37759	5.72e-10
ENSG00000233695	GAS6-AS1	lncRNA	Up-regulated	3.75194	5.72e-10
ENSG00000178821	TMEM52	Protein_Coding	Up-regulated	5.08724	6.21e-10
ENSG00000138271	GPR87	Protein_Coding	Up-regulated	8.42054	6.45e-10
ENSG00000101057	MYBL2	Protein_Coding	Down-regulated	-2.84565	7.34e-10
ENSG00000177076	ACER2	Protein_Coding	Up-regulated	4.01638	8.12e-10
ENSG00000291189	ENSG00000291189	lncRNA	Up-regulated	6.17279	9.93e-10
ENSG00000154839	SKA1	Protein_Coding	Down-regulated	-2.94546	1.1e-09
ENSG00000170312	CDK1	Protein_Coding	Down-regulated	-2.99635	1.12e-09
ENSG00000168918	INPP5D	Protein_Coding	Up-regulated	3.4968	1.28e-09
ENSG00000134222	PSRC1	Protein_Coding	Down-regulated	-3.27159	1.31e-09
ENSG00000129195	PIMREG	Protein_Coding	Down-regulated	-3.5191	1.42e-09
ENSG00000113368	LMNB1	Protein_Coding	Down-regulated	-2.78065	1.64e-09
ENSG00000092470	WDR76	Protein_Coding	Down-regulated	-3.21873	1.7e-09
ENSG00000205978	NYNRIN	Protein_Coding	Up-regulated	2.33314	1.7e-09
ENSG00000147166	ITGB1BP2	Protein_Coding	Down-regulated	-4.46985	1.76e-09
ENSG00000136943	CTSV	Protein_Coding	Up-regulated	4.80847	1.78e-09
ENSG00000140682	TGFB1I1	Protein_Coding	Down-regulated	-2.4458	1.79e-09
ENSG00000139269	INHBE	Protein_Coding	Down-regulated	-6.308	1.88e-09
ENSG00000161888	SPC24	Protein_Coding	Down-regulated	-2.82694	1.94e-09
ENSG00000111206	FOXM1	Protein_Coding	Down-regulated	-2.64275	2.26e-09
ENSG00000186642	PDE2A	Protein_Coding	Up-regulated	4.36608	2.54e-09
ENSG00000242732	RTL5	Protein_Coding	Up-regulated	2.46737	2.54e-09
ENSG00000122367	LDB3	Protein_Coding	Down-regulated	-5.13992	2.76e-09
ENSG00000154639	CXADR	Protein_Coding	Up-regulated	8.46872	3e-09
ENSG00000131153	GINS2	Protein_Coding	Down-regulated	-2.99038	3.81e-09
ENSG00000109805	NCAPG	Protein_Coding	Down-regulated	-2.93895	4.43e-09
ENSG00000095203	EPB41L4B	Protein_Coding	Up-regulated	3.64494	4.8e-09
ENSG00000107099	DOCK8	Protein_Coding	Up-regulated	3.14033	4.94e-09
ENSG00000074211	PPP2R2C	Protein_Coding	Up-regulated	5.40637	5.09e-09
ENSG00000148344	PTGES	Protein_Coding	Up-regulated	2.34188	5.48e-09
ENSG00000163347	CLDN1	Protein_Coding	Up-regulated	3.22709	5.76e-09
ENSG00000288743	ENSG00000288743	lncRNA	Up-regulated	4.64547	5.85e-09
ENSG00000171246	NPTX1	Protein_Coding	Up-regulated	3.1808	5.92e-09
ENSG00000197852	INKA2	Protein_Coding	Up-regulated	2.50973	6.16e-09
ENSG00000197903	H2BC12	Protein_Coding	Up-regulated	2.65706	6.16e-09
ENSG00000112029	FBXO5	Protein_Coding	Down-regulated	-3.00272	6.4e-09
ENSG00000129173	E2F8	Protein_Coding	Down-regulated	-4.21956	6.92e-09
ENSG00000123416	TUBA1B	Protein_Coding	Down-regulated	-2.41515	7.21e-09
ENSG00000075218	GTSE1	Protein_Coding	Down-regulated	-3.21182	8.03e-09
ENSG00000197093	GAL3ST4	Protein_Coding	Up-regulated	2.46404	8.19e-09
ENSG00000147573	TRIM55	Protein_Coding	Up-regulated	2.58389	8.21e-09
ENSG00000142623	PADI1	Protein_Coding	Up-regulated	3.69293	8.32e-09
ENSG00000093009	CDC45	Protein_Coding	Down-regulated	-3.13486	9.32e-09
ENSG00000162772	ATF3	Protein_Coding	Up-regulated	2.99826	9.45e-09
ENSG00000159753	CARMIL2	Protein_Coding	Down-regulated	-3.00475	9.6e-09
ENSG00000090889	KIF4A	Protein_Coding	Down-regulated	-2.87901	1.1e-08
ENSG00000280744	LINC01173	lncRNA	Up-regulated	5.50814	1.17e-08
ENSG00000119283	TRIM67	Protein_Coding	Up-regulated	3.68712	1.43e-08
ENSG00000100526	CDKN3	Protein_Coding	Down-regulated	-2.75727	1.44e-08
ENSG00000254510	ENSG00000254510	lncRNA	Down-regulated	-3.92212	1.47e-08
ENSG00000149503	INCENP	Protein_Coding	Down-regulated	-2.58221	1.52e-08
ENSG00000105650	PDE4C	Protein_Coding	Up-regulated	8.19309	1.68e-08
ENSG00000136114	THSD1	Protein_Coding	Up-regulated	3.2911	2.01e-08
ENSG00000198901	PRC1	Protein_Coding	Down-regulated	-3.06553	2.04e-08
ENSG00000165480	SKA3	Protein_Coding	Down-regulated	-2.9128	2.2e-08
ENSG00000013810	TACC3	Protein_Coding	Down-regulated	-2.35413	2.74e-08
ENSG00000130513	GDF15	Protein_Coding	Up-regulated	2.89986	2.83e-08
ENSG00000183114	FAM43B	Protein_Coding	Up-regulated	3.59767	2.91e-08
ENSG00000172890	NADSYN1	Protein_Coding	Up-regulated	2.37987	3.39e-08
ENSG00000117399	CDC20	Protein_Coding	Down-regulated	-2.77023	3.43e-08
ENSG00000163431	LMOD1	Protein_Coding	Down-regulated	-2.08953	3.6e-08
ENSG00000180155	LYNX1	Protein_Coding	Up-regulated	2.6205	3.63e-08
ENSG00000132819	RBM38	Protein_Coding	Up-regulated	2.47901	3.78e-08
ENSG00000132646	PCNA	Protein_Coding	Up-regulated	2.0966	3.87e-08
ENSG00000163808	KIF15	Protein_Coding	Down-regulated	-3.04483	3.87e-08
ENSG00000135451	TROAP	Protein_Coding	Down-regulated	-2.90818	4.12e-08
ENSG00000172403	SYNPO2	Protein_Coding	Down-regulated	-2.41422	4.86e-08
ENSG00000088836	SLC4A11	Protein_Coding	Up-regulated	2.73634	5.01e-08
ENSG00000095397	WHRN	Protein_Coding	Up-regulated	2.36296	5.62e-08
ENSG00000133131	MORC4	Protein_Coding	Up-regulated	2.25941	5.93e-08
ENSG00000125148	MT2A	Protein_Coding	Down-regulated	-2.29535	6.35e-08
ENSG00000134762	DSC3	Protein_Coding	Up-regulated	8.29326	6.92e-08
ENSG00000137807	KIF23	Protein_Coding	Down-regulated	-2.37582	7.15e-08
ENSG00000108688	CCL7	Protein_Coding	Up-regulated	4.438	7.19e-08
ENSG00000090020	SLC9A1	Protein_Coding	Up-regulated	2.11995	7.31e-08
ENSG00000143333	RGS16	Protein_Coding	Up-regulated	3.56857	7.85e-08
ENSG00000277287	ENSG00000277287	lncRNA	Up-regulated	2.77517	8.18e-08
ENSG00000143228	NUF2	Protein_Coding	Down-regulated	-3.5129	8.22e-08
ENSG00000076382	SPAG5	Protein_Coding	Down-regulated	-2.62004	8.33e-08
ENSG00000287750	LINC03026	lncRNA	Up-regulated	3.50295	8.33e-08
ENSG00000168811	IL12A	Protein_Coding	Up-regulated	5.31505	9.05e-08
ENSG00000134057	CCNB1	Protein_Coding	Down-regulated	-2.31365	9.5e-08
ENSG00000163584	RPL22L1	Protein_Coding	Down-regulated	-2.43238	1.01e-07
ENSG00000147509	RGS20	Protein_Coding	Up-regulated	2.92333	1.08e-07
ENSG00000110876	SELPLG	Protein_Coding	Up-regulated	2.77247	1.13e-07
ENSG00000082074	FYB1	Protein_Coding	Up-regulated	3.51514	1.15e-07
ENSG00000177791	MYOZ1	Protein_Coding	Down-regulated	-2.74917	1.46e-07
ENSG00000100678	SLC8A3	Protein_Coding	Up-regulated	2.99207	1.56e-07
ENSG00000138166	DUSP5	Protein_Coding	Up-regulated	2.29517	1.74e-07
ENSG00000137880	GCHFR	Protein_Coding	Up-regulated	2.88756	1.77e-07
ENSG00000013297	CLDN11	Protein_Coding	Up-regulated	2.86437	1.86e-07
ENSG00000186871	ERCC6L	Protein_Coding	Down-regulated	-2.83623	1.86e-07
ENSG00000196220	SRGAP3	Protein_Coding	Up-regulated	3.04373	2.02e-07
ENSG00000182175	RGMA	Protein_Coding	Up-regulated	2.91948	2.03e-07
ENSG00000095970	TREM2	Protein_Coding	Up-regulated	8.27589	2.1e-07
ENSG00000161509	GRIN2C	Protein_Coding	Up-regulated	8.05364	2.2e-07
ENSG00000259424	IRAIN	lncRNA	Up-regulated	4.37568	2.21e-07
ENSG00000117650	NEK2	Protein_Coding	Down-regulated	-2.89318	2.28e-07
ENSG00000266680	ENSG00000266680	lncRNA	Up-regulated	3.01368	2.57e-07
ENSG00000142583	SLC2A5	Protein_Coding	Up-regulated	6.12159	2.61e-07
ENSG00000161544	CYGB	Protein_Coding	Up-regulated	2.3872	2.61e-07
ENSG00000186193	SAPCD2	Protein_Coding	Down-regulated	-2.66527	2.64e-07
ENSG00000196730	DAPK1	Protein_Coding	Up-regulated	2.93174	2.87e-07
ENSG00000256092	SBNO1-AS1	lncRNA	Up-regulated	4.65659	3.07e-07
ENSG00000229950	TFAP2A-AS1	lncRNA	Up-regulated	2.59153	3.14e-07
ENSG00000103175	WFDC1	Protein_Coding	Down-regulated	-2.24878	3.21e-07
ENSG00000130176	CNN1	Protein_Coding	Down-regulated	-2.0689	3.59e-07
ENSG00000274290	H2BC6	Protein_Coding	Up-regulated	3.02225	3.92e-07
ENSG00000125657	TNFSF9	Protein_Coding	Up-regulated	3.05208	4.08e-07
ENSG00000182759	MAFA	Protein_Coding	Up-regulated	7.80663	4.32e-07
ENSG00000111348	ARHGDIB	Protein_Coding	Down-regulated	-2.40352	4.61e-07
ENSG00000118193	KIF14	Protein_Coding	Down-regulated	-3.0187	4.71e-07
ENSG00000166016	ABTB2	Protein_Coding	Up-regulated	2.59824	4.85e-07
ENSG00000125845	BMP2	Protein_Coding	Up-regulated	2.58296	4.97e-07
ENSG00000250337	PURPL	lncRNA	Up-regulated	2.6726	5.04e-07
ENSG00000120889	TNFRSF10B	Protein_Coding	Up-regulated	2.08593	5.17e-07
ENSG00000198729	PPP1R14C	Protein_Coding	Up-regulated	2.89905	5.51e-07
ENSG00000169750	RAC3	Protein_Coding	Down-regulated	-2.63324	5.64e-07
ENSG00000233276	GPX1	Protein_Coding	Up-regulated	2.89928	6.02e-07
ENSG00000173805	HAP1	Protein_Coding	Up-regulated	3.36647	6.25e-07
ENSG00000164237	CMBL	Protein_Coding	Up-regulated	2.04992	6.37e-07
ENSG00000104888	SLC17A7	Protein_Coding	Up-regulated	4.25054	6.71e-07
ENSG00000272081	FCHO2-DT	lncRNA	Up-regulated	3.30275	8.36e-07
ENSG00000167077	MEI1	Protein_Coding	Down-regulated	-7.70463	9.31e-07
ENSG00000167676	PLIN4	Protein_Coding	Up-regulated	5.76337	9.66e-07
ENSG00000147408	CSGALNACT1	Protein_Coding	Up-regulated	3.56404	1.13e-06
ENSG00000167553	TUBA1C	Protein_Coding	Down-regulated	-1.9831	1.13e-06
ENSG00000125965	GDF5	Protein_Coding	Up-regulated	3.61274	1.21e-06
ENSG00000164938	TP53INP1	Protein_Coding	Up-regulated	2.2319	1.21e-06
ENSG00000187741	FANCA	Protein_Coding	Down-regulated	-2.54303	1.21e-06
ENSG00000138061	CYP1B1	Protein_Coding	Up-regulated	3.60716	1.24e-06
ENSG00000171462	DLK2	Protein_Coding	Up-regulated	5.58129	1.28e-06
ENSG00000108950	FAM20A	Protein_Coding	Up-regulated	2.60395	1.35e-06
ENSG00000168014	C2CD3	Protein_Coding	Up-regulated	2.00089	1.45e-06
ENSG00000160606	TLCD1	Protein_Coding	Up-regulated	2.67945	1.47e-06
ENSG00000162882	HAAO	Protein_Coding	Up-regulated	2.53198	1.47e-06
ENSG00000178947	SMIM10L2A	Protein_Coding	Up-regulated	7.8089	1.56e-06
ENSG00000204936	CD177	Protein_Coding	Up-regulated	3.12429	1.57e-06
ENSG00000170271	FAXDC2	Protein_Coding	Up-regulated	2.06603	1.62e-06
ENSG00000184363	PKP3	Protein_Coding	Down-regulated	-7.83514	1.71e-06
ENSG00000186994	KANK3	Protein_Coding	Up-regulated	3.491	1.75e-06
ENSG00000152229	PSTPIP2	Protein_Coding	Up-regulated	2.35371	1.76e-06
ENSG00000011332	DPF1	Protein_Coding	Down-regulated	-3.05919	1.79e-06
ENSG00000291144	ENSG00000291144	lncRNA	Up-regulated	3.5597	1.82e-06
ENSG00000132517	SLC52A1	Protein_Coding	Up-regulated	3.0741	1.87e-06
ENSG00000254453	NAV2-AS2	lncRNA	Up-regulated	4.58196	1.97e-06
ENSG00000270882	H4C14	Protein_Coding	Up-regulated	4.46008	2.04e-06
ENSG00000042445	RETSAT	Protein_Coding	Up-regulated	1.9776	2.07e-06
ENSG00000272157	ENSG00000272157	lncRNA	Up-regulated	7.72518	2.16e-06
ENSG00000104228	TRIM35	Protein_Coding	Up-regulated	2.02078	2.28e-06
ENSG00000289194	ENSG00000289194	lncRNA	Down-regulated	-2.53631	2.43e-06
ENSG00000094916	CBX5	Protein_Coding	Down-regulated	-2.01375	2.48e-06
ENSG00000149809	TM7SF2	Protein_Coding	Up-regulated	2.46718	2.58e-06
ENSG00000140534	TICRR	Protein_Coding	Down-regulated	-2.72926	2.59e-06
ENSG00000173320	STOX2	Protein_Coding	Up-regulated	3.11364	2.99e-06
ENSG00000117115	PADI2	Protein_Coding	Up-regulated	4.46755	3.1e-06
ENSG00000120149	MSX2	Protein_Coding	Up-regulated	2.00341	3.23e-06
ENSG00000143401	ANP32E	Protein_Coding	Down-regulated	-2.31744	3.23e-06
ENSG00000198854	C1orf68	Protein_Coding	Up-regulated	7.57168	3.23e-06
ENSG00000237512	UNC5B-AS1	lncRNA	Up-regulated	2.53772	3.23e-06
ENSG00000177106	EPS8L2	Protein_Coding	Up-regulated	2.03643	3.28e-06
ENSG00000259091	LINC00517	lncRNA	Down-regulated	-2.64199	3.31e-06
ENSG00000198056	PRIM1	Protein_Coding	Down-regulated	-3.06255	3.36e-06
ENSG00000145934	TENM2	Protein_Coding	Down-regulated	-3.71318	3.65e-06
ENSG00000140284	SLC27A2	Protein_Coding	Up-regulated	3.17383	4.09e-06
ENSG00000127564	PKMYT1	Protein_Coding	Down-regulated	-2.64917	4.38e-06
ENSG00000167080	B4GALNT2	Protein_Coding	Up-regulated	4.45831	4.52e-06
ENSG00000236671	PRKG1-AS1	lncRNA	Up-regulated	2.68143	4.57e-06
ENSG00000122966	CIT	Protein_Coding	Down-regulated	-2.317	5.25e-06
ENSG00000167900	TK1	Protein_Coding	Down-regulated	-2.44821	5.29e-06
ENSG00000213722	DDAH2	Protein_Coding	Down-regulated	-2.1511	5.45e-06
ENSG00000183784	DOCK8-AS1	lncRNA	Up-regulated	4.8626	5.46e-06
ENSG00000244509	APOBEC3C	Protein_Coding	Up-regulated	1.79384	5.46e-06
ENSG00000149547	EI24	Protein_Coding	Up-regulated	1.85703	5.53e-06
ENSG00000080709	KCNN2	Protein_Coding	Down-regulated	-2.44358	5.63e-06
ENSG00000073849	ST6GAL1	Protein_Coding	Up-regulated	2.39846	5.89e-06
ENSG00000214513	NOTO	Protein_Coding	Up-regulated	7.5586	5.91e-06
ENSG00000130164	LDLR	Protein_Coding	Down-regulated	-2.43209	6.24e-06
ENSG00000164124	TMEM144	Protein_Coding	Up-regulated	2.93575	6.51e-06
ENSG00000144485	HES6	Protein_Coding	Up-regulated	3.76911	6.56e-06
ENSG00000121743	GJA3	Protein_Coding	Up-regulated	3.79891	6.68e-06
ENSG00000179300	RTL3	Protein_Coding	Down-regulated	-4.84099	6.93e-06
ENSG00000184486	POU3F2	Protein_Coding	Up-regulated	7.45774	7.05e-06
ENSG00000168078	PBK	Protein_Coding	Down-regulated	-2.32324	7.26e-06
ENSG00000102935	ZNF423	Protein_Coding	Up-regulated	2.60148	7.3e-06
ENSG00000153885	KCTD15	Protein_Coding	Down-regulated	-1.97945	7.54e-06
ENSG00000152137	HSPB8	Protein_Coding	Up-regulated	1.84029	8.04e-06
ENSG00000072195	SPEG	Protein_Coding	Down-regulated	-2.37752	8.07e-06
ENSG00000214517	PPME1	Protein_Coding	Up-regulated	1.975	8.19e-06
ENSG00000244649	LINC02086	lncRNA	Up-regulated	4.5959	8.19e-06
ENSG00000100439	ABHD4	Protein_Coding	Up-regulated	1.77952	8.29e-06
ENSG00000111981	ULBP1	Protein_Coding	Up-regulated	2.56679	8.43e-06
ENSG00000184194	GPR173	Protein_Coding	Down-regulated	-2.49017	8.66e-06
ENSG00000237989	LINC01679	lncRNA	Up-regulated	2.38253	9.01e-06
ENSG00000105825	TFPI2	Protein_Coding	Up-regulated	1.94077	1e-05
ENSG00000175600	SUGCT	Protein_Coding	Up-regulated	1.95044	1.02e-05
ENSG00000182687	GALR2	Protein_Coding	Up-regulated	3.74235	1.02e-05
ENSG00000172831	CES2	Protein_Coding	Up-regulated	1.73637	1.07e-05
ENSG00000165304	MELK	Protein_Coding	Down-regulated	-2.08755	1.14e-05
ENSG00000122877	EGR2	Protein_Coding	Up-regulated	2.66788	1.17e-05
ENSG00000101311	FERMT1	Protein_Coding	Up-regulated	2.60751	1.18e-05
ENSG00000178301	AQP11	Protein_Coding	Up-regulated	2.3634	1.18e-05
ENSG00000174371	EXO1	Protein_Coding	Down-regulated	-2.37297	1.22e-05
ENSG00000060138	YBX3	Protein_Coding	Up-regulated	1.9038	1.23e-05
ENSG00000137463	MGARP	Protein_Coding	Up-regulated	1.94341	1.23e-05
ENSG00000138160	KIF11	Protein_Coding	Down-regulated	-2.34253	1.23e-05
ENSG00000189410	SH2D5	Protein_Coding	Up-regulated	2.67378	1.25e-05
ENSG00000100298	APOBEC3H	Protein_Coding	Up-regulated	4.72494	1.26e-05
ENSG00000137857	DUOX1	Protein_Coding	Up-regulated	7.42438	1.26e-05
ENSG00000258457	AJUBA-DT	lncRNA	Up-regulated	2.44801	1.29e-05
ENSG00000136378	ADAMTS7	Protein_Coding	Up-regulated	2.22121	1.3e-05
ENSG00000042832	TG	Protein_Coding	Up-regulated	2.98706	1.31e-05
ENSG00000271926	ENSG00000271926	lncRNA	Up-regulated	3.61212	1.41e-05
ENSG00000130600	H19	lncRNA	Up-regulated	2.7793	1.54e-05
ENSG00000142945	KIF2C	Protein_Coding	Down-regulated	-2.23457	1.54e-05
ENSG00000214357	NEURL1B	Protein_Coding	Down-regulated	-2.34284	1.55e-05
ENSG00000116329	OPRD1	Protein_Coding	Up-regulated	3.70231	1.56e-05
ENSG00000225877	PSG8-AS1	lncRNA	Up-regulated	3.4368	1.56e-05
ENSG00000213853	EMP2	Protein_Coding	Down-regulated	-1.90278	1.65e-05
ENSG00000177595	PIDD1	Protein_Coding	Up-regulated	2.63737	1.66e-05
ENSG00000123485	HJURP	Protein_Coding	Down-regulated	-1.9235	1.67e-05
ENSG00000151689	INPP1	Protein_Coding	Up-regulated	1.93963	1.67e-05
ENSG00000145386	CCNA2	Protein_Coding	Down-regulated	-2.50076	1.68e-05
ENSG00000095713	CRTAC1	Protein_Coding	Up-regulated	3.98198	1.76e-05
ENSG00000175305	CCNE2	Protein_Coding	Down-regulated	-3.0327	1.89e-05
ENSG00000004777	ARHGAP33	Protein_Coding	Down-regulated	-2.69913	1.94e-05
ENSG00000167196	FBXO22	Protein_Coding	Up-regulated	1.90302	2.05e-05
ENSG00000138356	AOX1	Protein_Coding	Up-regulated	2.10534	2.07e-05
ENSG00000232931	LINC00342	lncRNA	Down-regulated	-2.84174	2.09e-05
ENSG00000076706	MCAM	Protein_Coding	Down-regulated	-1.86621	2.1e-05
ENSG00000135476	ESPL1	Protein_Coding	Down-regulated	-2.61847	2.1e-05
ENSG00000185669	SNAI3	Protein_Coding	Up-regulated	7.30504	2.1e-05
ENSG00000172794	RAB37	Protein_Coding	Up-regulated	7.31283	2.14e-05
ENSG00000258655	ARHGAP5-AS1	lncRNA	Up-regulated	2.29725	2.21e-05
ENSG00000085563	ABCB1	Protein_Coding	Up-regulated	5.21725	2.28e-05
ENSG00000100206	DMC1	Protein_Coding	Down-regulated	-7.33811	2.3e-05
ENSG00000231131	LNCAROD	lncRNA	Up-regulated	2.81736	2.3e-05
ENSG00000175084	DES	Protein_Coding	Down-regulated	-2.30078	2.31e-05
ENSG00000179165	PXT1	Protein_Coding	Up-regulated	7.31953	2.35e-05
ENSG00000128285	MCHR1	Protein_Coding	Up-regulated	2.44245	2.52e-05
ENSG00000267060	PTGES3L	Protein_Coding	Down-regulated	-2.46559	2.52e-05
ENSG00000166317	SYNPO2L	Protein_Coding	Down-regulated	-2.30538	2.59e-05
ENSG00000010030	ETV7	Protein_Coding	Up-regulated	2.37886	2.6e-05
ENSG00000117152	RGS4	Protein_Coding	Down-regulated	-2.41393	2.6e-05
ENSG00000277196	PRODH	Protein_Coding	Up-regulated	7.32695	2.68e-05
ENSG00000088325	TPX2	Protein_Coding	Down-regulated	-1.82075	2.85e-05
ENSG00000103528	SYT17	Protein_Coding	Up-regulated	5.18062	2.86e-05
ENSG00000264672	SEPTIN4-AS1	lncRNA	Up-regulated	5.19259	2.92e-05
ENSG00000103723	AP3B2	Protein_Coding	Up-regulated	2.83412	2.99e-05
ENSG00000171320	ESCO2	Protein_Coding	Down-regulated	-2.39469	3.02e-05
ENSG00000250041	ENSG00000250041	lncRNA	Up-regulated	5.19876	3.1e-05
ENSG00000100889	PCK2	Protein_Coding	Down-regulated	-2.07522	3.24e-05
ENSG00000165935	SMCO2	Protein_Coding	Up-regulated	3.17652	3.38e-05
ENSG00000106992	AK1	Protein_Coding	Up-regulated	1.92907	3.63e-05
ENSG00000163251	FZD5	Protein_Coding	Up-regulated	2.26121	3.63e-05
ENSG00000211448	DIO2	Protein_Coding	Down-regulated	-2.18294	3.73e-05
ENSG00000143318	CASQ1	Protein_Coding	Down-regulated	-4.70291	3.86e-05
ENSG00000173575	CHD2	Protein_Coding	Down-regulated	-1.79436	3.86e-05
ENSG00000040731	CDH10	Protein_Coding	Up-regulated	7.39505	3.92e-05
ENSG00000137310	TCF19	Protein_Coding	Down-regulated	-1.8237	3.92e-05
ENSG00000162073	PAQR4	Protein_Coding	Down-regulated	-2.23169	4.19e-05
ENSG00000108813	DLX4	Protein_Coding	Up-regulated	3.72078	4.41e-05
ENSG00000162552	WNT4	Protein_Coding	Up-regulated	3.07543	4.72e-05
ENSG00000135926	TMBIM1	Protein_Coding	Up-regulated	1.76619	4.76e-05
ENSG00000270194	GOLGA4-AS1	lncRNA	Up-regulated	2.34451	4.86e-05
ENSG00000107796	ACTA2	Protein_Coding	Down-regulated	-1.96228	4.93e-05
ENSG00000249992	TMEM158	Protein_Coding	Up-regulated	2.07026	5.01e-05
ENSG00000121152	NCAPH	Protein_Coding	Down-regulated	-2.22538	5.02e-05
ENSG00000147813	NAPRT	Protein_Coding	Down-regulated	-3.06337	5.11e-05
ENSG00000277363	SRCIN1	Protein_Coding	Up-regulated	4.59624	5.17e-05
ENSG00000177551	NHLH2	Protein_Coding	Up-regulated	4.64159	5.39e-05
ENSG00000136859	ANGPTL2	Protein_Coding	Up-regulated	1.68688	5.48e-05
ENSG00000137266	SLC22A23	Protein_Coding	Up-regulated	2.28171	5.48e-05
ENSG00000139219	COL2A1	Protein_Coding	Up-regulated	5.18424	5.5e-05
ENSG00000131711	MAP1B	Protein_Coding	Down-regulated	-1.93428	5.53e-05
ENSG00000165072	MAMDC2	Protein_Coding	Up-regulated	2.37432	5.54e-05
ENSG00000185924	RTN4RL1	Protein_Coding	Up-regulated	2.21852	5.57e-05
ENSG00000135750	KCNK1	Protein_Coding	Up-regulated	2.17719	5.78e-05
ENSG00000136003	ISCU	Protein_Coding	Up-regulated	1.66277	5.78e-05
ENSG00000101849	TBL1X	Protein_Coding	Down-regulated	-1.82971	5.95e-05
ENSG00000170836	PPM1D	Protein_Coding	Up-regulated	2.03789	5.96e-05
ENSG00000104892	KLC3	Protein_Coding	Up-regulated	3.87624	6.03e-05
ENSG00000288873	ENSG00000288873	lncRNA	Up-regulated	2.23423	6.07e-05
ENSG00000277224	H2BC7	Protein_Coding	Up-regulated	3.91797	6.35e-05
ENSG00000115687	PASK	Protein_Coding	Down-regulated	-2.25634	6.38e-05
ENSG00000035499	DEPDC1B	Protein_Coding	Down-regulated	-2.2739	6.64e-05
ENSG00000287516	ENSG00000287516	lncRNA	Up-regulated	2.24612	6.67e-05
ENSG00000174808	BTC	Protein_Coding	Up-regulated	7.40155	6.85e-05
ENSG00000156486	KCNS2	Protein_Coding	Up-regulated	2.6969	6.88e-05
ENSG00000277157	H4C4	Protein_Coding	Up-regulated	4.60382	6.99e-05
ENSG00000110375	UPK2	Protein_Coding	Up-regulated	2.4818	7.21e-05
ENSG00000132274	TRIM22	Protein_Coding	Up-regulated	1.67066	7.28e-05
ENSG00000290032	ENSG00000290032	lncRNA	Up-regulated	2.36269	7.53e-05
ENSG00000029534	ANK1	Protein_Coding	Up-regulated	1.71049	7.96e-05
ENSG00000257839	PHLDA1-DT	lncRNA	Up-regulated	7.44405	8.02e-05
ENSG00000102996	MMP15	Protein_Coding	Up-regulated	1.9101	8.35e-05
ENSG00000079308	TNS1	Protein_Coding	Down-regulated	-1.5889	8.53e-05
ENSG00000136492	BRIP1	Protein_Coding	Down-regulated	-2.15043	8.83e-05
ENSG00000164035	EMCN	Protein_Coding	Down-regulated	-2.47075	9.01e-05
ENSG00000184661	CDCA2	Protein_Coding	Down-regulated	-2.14855	9.04e-05
ENSG00000065357	DGKA	Protein_Coding	Up-regulated	1.57829	9.23e-05
ENSG00000134107	BHLHE40	Protein_Coding	Up-regulated	1.80879	9.47e-05
ENSG00000198691	ABCA4	Protein_Coding	Up-regulated	7.10208	9.51e-05
ENSG00000176531	PHLDB3	Protein_Coding	Up-regulated	2.11196	9.62e-05
ENSG00000255197	ENSG00000255197	lncRNA	Up-regulated	2.462	9.79e-05
ENSG00000066279	ASPM	Protein_Coding	Down-regulated	-2.82297	9.8e-05
ENSG00000197415	VEPH1	Protein_Coding	Down-regulated	-2.0505	9.86e-05
ENSG00000134574	DDB2	Protein_Coding	Up-regulated	1.73262	0.000100607
ENSG00000179855	GIPC3	Protein_Coding	Down-regulated	-2.65916	0.000102246
ENSG00000138778	CENPE	Protein_Coding	Down-regulated	-2.98404	0.000102742
ENSG00000224259	LINC01133	lncRNA	Down-regulated	-3.91233	0.000102742
ENSG00000240891	PLCXD2	Protein_Coding	Up-regulated	2.41757	0.000102742
ENSG00000139438	FAM222A	Protein_Coding	Up-regulated	2.12881	0.000106947
ENSG00000150551	LYPD1	Protein_Coding	Up-regulated	2.14547	0.000106947
ENSG00000129810	SGO1	Protein_Coding	Down-regulated	-2.31809	0.000108709
ENSG00000179148	ALOXE3	Protein_Coding	Up-regulated	3.11135	0.000111876
ENSG00000005469	CROT	Protein_Coding	Up-regulated	1.97479	0.000113287
ENSG00000156970	BUB1B	Protein_Coding	Down-regulated	-2.22038	0.000115396
ENSG00000084693	AGBL5	Protein_Coding	Up-regulated	1.87562	0.00012785
ENSG00000103056	SMPD3	Protein_Coding	Up-regulated	7.34307	0.000130823
ENSG00000100162	CENPM	Protein_Coding	Down-regulated	-2.90219	0.000131476
ENSG00000164045	CDC25A	Protein_Coding	Down-regulated	-2.08045	0.000132686
ENSG00000170624	SGCD	Protein_Coding	Down-regulated	-2.12472	0.000135104
ENSG00000097046	CDC7	Protein_Coding	Down-regulated	-2.28402	0.00013524
ENSG00000100504	PYGL	Protein_Coding	Up-regulated	1.67035	0.00014117
ENSG00000107187	LHX3	Protein_Coding	Up-regulated	7.03296	0.000144386
ENSG00000133878	DUSP26	Protein_Coding	Up-regulated	2.60494	0.000149693
ENSG00000164778	EN2	Protein_Coding	Up-regulated	7.00572	0.000151076
ENSG00000171617	ENC1	Protein_Coding	Up-regulated	1.66774	0.000152774
ENSG00000163956	LRPAP1	Protein_Coding	Up-regulated	1.76732	0.000158819
ENSG00000203446	SUGCT-AS1	lncRNA	Up-regulated	2.49915	0.00015897
ENSG00000257219	LNCOG	lncRNA	Up-regulated	2.10105	0.00016027
ENSG00000139514	SLC7A1	Protein_Coding	Down-regulated	-1.5687	0.000162231
ENSG00000196230	TUBB	Protein_Coding	Down-regulated	-2.02478	0.00016477
ENSG00000166578	IQCD	Protein_Coding	Up-regulated	2.15425	0.000165592
ENSG00000169715	MT1E	Protein_Coding	Down-regulated	-1.72471	0.000170312
ENSG00000172350	ABCG4	Protein_Coding	Up-regulated	2.82493	0.000171288
ENSG00000073060	SCARB1	Protein_Coding	Up-regulated	1.79128	0.000172628
ENSG00000116717	GADD45A	Protein_Coding	Up-regulated	1.59432	0.000178425
ENSG00000170667	RASA4B	Protein_Coding	Down-regulated	-2.54869	0.000178425
ENSG00000090512	FETUB	Protein_Coding	Up-regulated	6.97776	0.000180238
ENSG00000184445	KNTC1	Protein_Coding	Down-regulated	-2.05984	0.000182756
ENSG00000154734	ADAMTS1	Protein_Coding	Down-regulated	-1.54251	0.000183301
ENSG00000126950	TMEM35A	Protein_Coding	Up-regulated	2.04683	0.000183757
ENSG00000167904	TMEM68	Protein_Coding	Up-regulated	1.91197	0.000186472
ENSG00000119630	PGF	Protein_Coding	Up-regulated	1.96765	0.000187437
ENSG00000163882	POLR2H	Protein_Coding	Up-regulated	1.82742	0.0001909
ENSG00000138180	CEP55	Protein_Coding	Down-regulated	-2.18501	0.000192176
ENSG00000248206	ENSG00000248206	lncRNA	Up-regulated	4.35663	0.000198758
ENSG00000127329	PTPRB	Protein_Coding	Up-regulated	1.99446	0.000200379
ENSG00000268894	PLCE1-AS1	lncRNA	Up-regulated	3.35987	0.000202023
ENSG00000150995	ITPR1	Protein_Coding	Up-regulated	2.33821	0.000205435
ENSG00000143951	WDPCP	Protein_Coding	Down-regulated	-2.01074	0.000206525
ENSG00000258017	ENSG00000258017	lncRNA	Down-regulated	-2.2587	0.000206525
ENSG00000185432	METTL7A	Protein_Coding	Up-regulated	2.02017	0.000208413
ENSG00000136867	SLC31A2	Protein_Coding	Up-regulated	1.98292	0.000214731
ENSG00000123610	TNFAIP6	Protein_Coding	Up-regulated	2.20555	0.000218773
ENSG00000085117	CD82	Protein_Coding	Up-regulated	1.82807	0.000219509
ENSG00000092621	PHGDH	Protein_Coding	Down-regulated	-1.7576	0.000221347
ENSG00000181541	MAB21L2	Protein_Coding	Up-regulated	3.54117	0.000227523
ENSG00000067836	ROGDI	Protein_Coding	Down-regulated	-1.9834	0.000228959
ENSG00000173846	PLK3	Protein_Coding	Up-regulated	1.88143	0.000228959
ENSG00000182541	LIMK2	Protein_Coding	Up-regulated	1.9509	0.000235037
ENSG00000272398	CD24	Protein_Coding	Up-regulated	4.27971	0.000235489
ENSG00000223382	LINC01778	lncRNA	Up-regulated	5.00713	0.000235752
ENSG00000180139	ACTA2-AS1	lncRNA	Down-regulated	-2.88766	0.000237084
ENSG00000184992	BRI3BP	Protein_Coding	Down-regulated	-1.97662	0.000237084
ENSG00000116761	CTH	Protein_Coding	Down-regulated	-2.42995	0.000238197
ENSG00000102387	TAF7L	Protein_Coding	Up-regulated	3.76977	0.00023822
ENSG00000136938	ANP32B	Protein_Coding	Down-regulated	-1.60203	0.00023822
ENSG00000187714	SLC18A3	Protein_Coding	Up-regulated	7.13273	0.00023822
ENSG00000248964	ENSG00000248964	lncRNA	Up-regulated	7.00473	0.00024127
ENSG00000120802	TMPO	Protein_Coding	Down-regulated	-2.03059	0.000241973
ENSG00000270885	RASL10B	Protein_Coding	Down-regulated	-2.13262	0.000245713
ENSG00000249641	HOXC13-AS	lncRNA	Up-regulated	2.10157	0.000246551
ENSG00000165985	C1QL3	Protein_Coding	Up-regulated	7.05874	0.000255046
ENSG00000072571	HMMR	Protein_Coding	Down-regulated	-2.70905	0.00025637
ENSG00000156509	FBXO43	Protein_Coding	Down-regulated	-2.92932	0.00025637
ENSG00000102804	TSC22D1	Protein_Coding	Up-regulated	1.62851	0.000256967
ENSG00000163739	CXCL1	Protein_Coding	Down-regulated	-1.69431	0.000259403
ENSG00000173110	HSPA6	Protein_Coding	Up-regulated	6.91342	0.000268892
ENSG00000183153	GJD3	Protein_Coding	Up-regulated	1.97481	0.000268892
ENSG00000118898	PPL	Protein_Coding	Up-regulated	6.91341	0.000269333
ENSG00000169429	CXCL8	Protein_Coding	Down-regulated	-1.67279	0.000271245
ENSG00000143772	ITPKB	Protein_Coding	Up-regulated	1.7198	0.000279609
ENSG00000159259	CHAF1B	Protein_Coding	Down-regulated	-1.93473	0.000279609
ENSG00000178878	APOLD1	Protein_Coding	Down-regulated	-1.99049	0.000293951
ENSG00000169116	PARM1	Protein_Coding	Up-regulated	2.92259	0.000295401
ENSG00000081087	OSTM1	Protein_Coding	Up-regulated	1.76684	0.000297395
ENSG00000142621	FHAD1	Protein_Coding	Up-regulated	3.63336	0.000304557
ENSG00000138347	MYPN	Protein_Coding	Down-regulated	-1.95736	0.000306433
ENSG00000172020	GAP43	Protein_Coding	Down-regulated	-2.14346	0.000307259
ENSG00000169136	ATF5	Protein_Coding	Up-regulated	1.52369	0.000310621
ENSG00000135346	CGA	Protein_Coding	Up-regulated	4.85172	0.000312528
ENSG00000204136	GGTA1	Protein_Coding	Up-regulated	4.25887	0.000313262
ENSG00000012048	BRCA1	Protein_Coding	Down-regulated	-1.87887	0.000321239
ENSG00000101412	E2F1	Protein_Coding	Down-regulated	-1.91259	0.000321535
ENSG00000119403	PHF19	Protein_Coding	Down-regulated	-1.8385	0.00032346
ENSG00000139734	DIAPH3	Protein_Coding	Down-regulated	-2.25001	0.000332194
ENSG00000117724	CENPF	Protein_Coding	Down-regulated	-1.81396	0.000332933
ENSG00000179869	ABCA13	Protein_Coding	Up-regulated	2.83685	0.000332933
ENSG00000116701	NCF2	Protein_Coding	Down-regulated	-2.52351	0.000344917
ENSG00000090530	P3H2	Protein_Coding	Up-regulated	1.67347	0.000348276
ENSG00000104435	STMN2	Protein_Coding	Down-regulated	-1.53427	0.000348276
ENSG00000230918	DPP4-DT	lncRNA	Up-regulated	3.57419	0.000348276
ENSG00000260577	CDH3-AS1	lncRNA	Up-regulated	2.6543	0.000348276
ENSG00000257702	LBX2-AS1	lncRNA	Up-regulated	1.9675	0.000349085
ENSG00000113231	PDE8B	Protein_Coding	Down-regulated	-2.19814	0.000351497
ENSG00000179820	MYADM	Protein_Coding	Down-regulated	-1.64866	0.000372633
ENSG00000168060	NAALADL1	Protein_Coding	Down-regulated	-2.24215	0.000374965
ENSG00000187068	C3orf70	Protein_Coding	Down-regulated	-2.30359	0.000379709
ENSG00000275632	ENSG00000275632	lncRNA	Down-regulated	-3.23219	0.00038026
ENSG00000153531	ADPRHL1	Protein_Coding	Up-regulated	2.03139	0.000383556
ENSG00000167552	TUBA1A	Protein_Coding	Down-regulated	-1.49819	0.00040052
ENSG00000115008	IL1A	Protein_Coding	Up-regulated	2.49597	0.00040827
ENSG00000253368	TRNP1	Protein_Coding	Down-regulated	-1.47789	0.000420526
ENSG00000115641	FHL2	Protein_Coding	Up-regulated	1.56652	0.000431973
ENSG00000124762	CDKN1A	Protein_Coding	Up-regulated	2.02645	0.000449539
ENSG00000131669	NINJ1	Protein_Coding	Up-regulated	1.71294	0.000449539
ENSG00000196152	ZNF79	Protein_Coding	Up-regulated	1.95838	0.000449539
ENSG00000176490	DIRAS1	Protein_Coding	Down-regulated	-1.86373	0.000453797
ENSG00000100065	CARD10	Protein_Coding	Up-regulated	2.36715	0.000489493
ENSG00000243137	PSG4	Protein_Coding	Up-regulated	1.46354	0.000493207
ENSG00000017427	IGF1	Protein_Coding	Down-regulated	-2.59456	0.000493211
ENSG00000108384	RAD51C	Protein_Coding	Up-regulated	1.70407	0.000493645
ENSG00000242147	LASTR	lncRNA	Up-regulated	2.01016	0.000502416
ENSG00000171840	NINJ2	Protein_Coding	Up-regulated	3.02679	0.000514843
ENSG00000174370	KCNJ5-AS1	lncRNA	Up-regulated	2.06186	0.000514843
ENSG00000146250	PRSS35	Protein_Coding	Up-regulated	2.43774	0.00051676
ENSG00000108932	SLC16A6	Protein_Coding	Up-regulated	3.5538	0.000518386
ENSG00000079616	KIF22	Protein_Coding	Down-regulated	-1.7717	0.000519847
ENSG00000158402	CDC25C	Protein_Coding	Down-regulated	-2.27184	0.000521663
ENSG00000184371	CSF1	Protein_Coding	Up-regulated	1.46824	0.000537191
ENSG00000065054	SLC9A3R2	Protein_Coding	Down-regulated	-1.47053	0.000542643
ENSG00000048392	RRM2B	Protein_Coding	Up-regulated	1.74185	0.00054931
ENSG00000274818	ENSG00000274818	lncRNA	Up-regulated	2.98151	0.00054931
ENSG00000131398	KCNC3	Protein_Coding	Up-regulated	2.92724	0.000549603
ENSG00000197299	BLM	Protein_Coding	Down-regulated	-1.91948	0.000549603
ENSG00000104419	NDRG1	Protein_Coding	Up-regulated	1.57589	0.000560197
ENSG00000182704	TSKU	Protein_Coding	Up-regulated	1.88851	0.000560197
ENSG00000268812	LIF-AS2	lncRNA	Up-regulated	6.78292	0.000560197
ENSG00000288852	ENSG00000288852	lncRNA	Up-regulated	2.27447	0.000582071
ENSG00000170855	TRIAP1	Protein_Coding	Up-regulated	1.62938	0.00062335
ENSG00000277369	ENSG00000277369	lncRNA	Up-regulated	2.36113	0.00062335
ENSG00000178015	GPR150	Protein_Coding	Up-regulated	2.3007	0.000641672
ENSG00000117335	CD46	Protein_Coding	Up-regulated	1.73028	0.000645017
ENSG00000291174	ENSG00000291174	lncRNA	Up-regulated	1.71488	0.000645099
ENSG00000289511	ENSG00000289511	lncRNA	Up-regulated	1.99405	0.00064557
ENSG00000138798	EGF	Protein_Coding	Down-regulated	-2.76149	0.000652008
ENSG00000123080	CDKN2C	Protein_Coding	Down-regulated	-1.77878	0.000656434
ENSG00000156968	MPV17L	Protein_Coding	Down-regulated	-3.66064	0.000681644
ENSG00000102384	CENPI	Protein_Coding	Down-regulated	-1.91873	0.000706639
ENSG00000134690	CDCA8	Protein_Coding	Down-regulated	-1.88276	0.000708891
ENSG00000149218	ENDOD1	Protein_Coding	Up-regulated	1.61474	0.000719393
ENSG00000161547	SRSF2	Protein_Coding	Down-regulated	-1.52448	0.000719393
ENSG00000051180	RAD51	Protein_Coding	Down-regulated	-1.8755	0.000720731
ENSG00000183560	IZUMO1R	Protein_Coding	Up-regulated	6.80434	0.000725891
ENSG00000162511	LAPTM5	Protein_Coding	Up-regulated	2.26219	0.000733965
ENSG00000138131	LOXL4	Protein_Coding	Up-regulated	1.66537	0.000753022
ENSG00000100714	MTHFD1	Protein_Coding	Down-regulated	-1.59924	0.000763756
ENSG00000107537	PHYH	Protein_Coding	Up-regulated	1.58124	0.00077031
ENSG00000162881	OXER1	Protein_Coding	Up-regulated	2.35771	0.000779785
ENSG00000173156	RHOD	Protein_Coding	Up-regulated	1.82187	0.000779785
ENSG00000149968	MMP3	Protein_Coding	Up-regulated	1.60873	0.000785647
ENSG00000198625	MDM4	Protein_Coding	Down-regulated	-1.88943	0.00078612
ENSG00000152782	PANK1	Protein_Coding	Up-regulated	2.07046	0.000804467
ENSG00000288961	ENSG00000288961	lncRNA	Up-regulated	2.28492	0.000805379
ENSG00000174576	NPAS4	Protein_Coding	Down-regulated	-6.76325	0.000809811
ENSG00000104368	PLAT	Protein_Coding	Up-regulated	1.47942	0.000826634
ENSG00000170734	POLH	Protein_Coding	Up-regulated	1.47476	0.000845124
ENSG00000151876	FBXO4	Protein_Coding	Down-regulated	-2.15321	0.000848514
ENSG00000170464	DNAJC18	Protein_Coding	Up-regulated	1.65893	0.000848514
ENSG00000172264	MACROD2	Protein_Coding	Down-regulated	-2.74324	0.000848514
ENSG00000137338	PGBD1	Protein_Coding	Down-regulated	-1.85907	0.000870229
ENSG00000151136	ABTB3	Protein_Coding	Up-regulated	2.26094	0.000876192
ENSG00000149554	CHEK1	Protein_Coding	Down-regulated	-1.99866	0.000906193
ENSG00000261801	LOXL1-AS1	lncRNA	Down-regulated	-1.88221	0.000923201
ENSG00000291177	ENSG00000291177	lncRNA	Up-regulated	2.19781	0.000946347
ENSG00000158258	CLSTN2	Protein_Coding	Up-regulated	2.1077	0.000949115
ENSG00000235831	BHLHE40-AS1	lncRNA	Up-regulated	3.34906	0.000957392
ENSG00000171540	OTP	Protein_Coding	Up-regulated	6.72688	0.000960633
ENSG00000188153	COL4A5	Protein_Coding	Up-regulated	1.86774	0.000961347
ENSG00000239887	C1orf226	Protein_Coding	Up-regulated	2.00923	0.000970833
ENSG00000164050	PLXNB1	Protein_Coding	Up-regulated	1.82238	0.000982948
ENSG00000138346	DNA2	Protein_Coding	Down-regulated	-2.20254	0.000992567
ENSG00000171877	FRMD5	Protein_Coding	Up-regulated	2.0196	0.000997907
ENSG00000137216	TMEM63B	Protein_Coding	Up-regulated	1.55341	0.000999482
ENSG00000205078	SYCE1L	Protein_Coding	Up-regulated	2.07795	0.00100682
ENSG00000180801	ARSJ	Protein_Coding	Down-regulated	-1.62142	0.00102173
ENSG00000143320	CRABP2	Protein_Coding	Up-regulated	1.44249	0.00104379
ENSG00000100154	TTC28	Protein_Coding	Down-regulated	-1.62297	0.00105274
ENSG00000186815	TPCN1	Protein_Coding	Up-regulated	1.56061	0.00105652
ENSG00000111247	RAD51AP1	Protein_Coding	Down-regulated	-1.9567	0.00109352
ENSG00000187091	PLCD1	Protein_Coding	Up-regulated	1.67315	0.00111068
ENSG00000166130	IKBIP	Protein_Coding	Up-regulated	1.64707	0.00114404
ENSG00000094804	CDC6	Protein_Coding	Down-regulated	-1.91971	0.0011531
ENSG00000130821	SLC6A8	Protein_Coding	Up-regulated	1.59371	0.00116935
ENSG00000138376	BARD1	Protein_Coding	Down-regulated	-2.12844	0.00117639
ENSG00000144395	CCDC150	Protein_Coding	Down-regulated	-2.03108	0.00117639
ENSG00000147889	CDKN2A	Protein_Coding	Down-regulated	-1.83912	0.00117639
ENSG00000148175	STOM	Protein_Coding	Up-regulated	1.47737	0.00117639
ENSG00000173442	EHBP1L1	Protein_Coding	Down-regulated	-1.48669	0.00118875
ENSG00000143476	DTL	Protein_Coding	Down-regulated	-1.9154	0.00121839
ENSG00000111684	LPCAT3	Protein_Coding	Up-regulated	1.56016	0.00122161
ENSG00000204764	RANBP17	Protein_Coding	Down-regulated	-2.13028	0.00122161
ENSG00000008853	RHOBTB2	Protein_Coding	Down-regulated	-1.69373	0.00122332
ENSG00000116514	RNF19B	Protein_Coding	Up-regulated	1.73204	0.00124061
ENSG00000225968	ELFN1	Protein_Coding	Up-regulated	1.75229	0.00124564
ENSG00000237975	FLG-AS1	lncRNA	Up-regulated	1.99682	0.00129015
ENSG00000106105	GARS1	Protein_Coding	Down-regulated	-1.47885	0.001293
ENSG00000075461	CACNG4	Protein_Coding	Down-regulated	-2.0237	0.00132668
ENSG00000281344	HELLPAR	lncRNA	Down-regulated	-1.85079	0.0013681
ENSG00000106772	PRUNE2	Protein_Coding	Down-regulated	-2.57286	0.00144269
ENSG00000204682	MIR1915HG	lncRNA	Up-regulated	1.80534	0.00144269
ENSG00000114166	KAT2B	Protein_Coding	Up-regulated	1.87782	0.00144855
ENSG00000170385	SLC30A1	Protein_Coding	Up-regulated	2.03574	0.00145176
ENSG00000169607	CKAP2L	Protein_Coding	Down-regulated	-1.59986	0.00147265
ENSG00000157873	TNFRSF14	Protein_Coding	Up-regulated	2.05398	0.00150307
ENSG00000051341	POLQ	Protein_Coding	Down-regulated	-1.85139	0.00151463
ENSG00000183273	CCDC60	Protein_Coding	Up-regulated	6.87651	0.00152746
ENSG00000136098	NEK3	Protein_Coding	Down-regulated	-1.90773	0.00152894
ENSG00000177335	LINC02904	lncRNA	Up-regulated	1.73858	0.0015514
ENSG00000198673	TAFA2	Protein_Coding	Up-regulated	3.25924	0.00155621
ENSG00000105371	ICAM4	Protein_Coding	Up-regulated	2.29324	0.00158189
ENSG00000268621	IGFL2-AS1	lncRNA	Up-regulated	6.62487	0.00158189
ENSG00000076003	MCM6	Protein_Coding	Down-regulated	-1.79004	0.00161946
ENSG00000142347	MYO1F	Protein_Coding	Down-regulated	-2.67655	0.00161946
ENSG00000029153	BMAL2	Protein_Coding	Down-regulated	-1.71853	0.00165908
ENSG00000146670	CDCA5	Protein_Coding	Down-regulated	-1.76485	0.00165912
ENSG00000173926	MARCHF3	Protein_Coding	Up-regulated	1.79089	0.00166453
ENSG00000075702	WDR62	Protein_Coding	Down-regulated	-1.76288	0.00169542
ENSG00000163596	ICA1L	Protein_Coding	Down-regulated	-2.03759	0.00169542
ENSG00000169679	BUB1	Protein_Coding	Down-regulated	-1.77864	0.0017302
ENSG00000122952	ZWINT	Protein_Coding	Down-regulated	-1.57177	0.00173265
ENSG00000288956	ENSG00000288956	lncRNA	Up-regulated	6.5807	0.00173471
ENSG00000131979	GCH1	Protein_Coding	Up-regulated	2.13361	0.00173819
ENSG00000174804	FZD4	Protein_Coding	Up-regulated	1.55625	0.0017454
ENSG00000253438	PCAT1	lncRNA	Up-regulated	4.55541	0.00175241
ENSG00000130487	KLHDC7B	Protein_Coding	Down-regulated	-3.24778	0.00176107
ENSG00000161860	SYCE2	Protein_Coding	Down-regulated	-3.0507	0.00179345
ENSG00000171469	ZNF561	Protein_Coding	Up-regulated	1.55543	0.00182728
ENSG00000174697	LEP	Protein_Coding	Up-regulated	6.91642	0.00182728
ENSG00000187840	EIF4EBP1	Protein_Coding	Down-regulated	-1.69853	0.00186283
ENSG00000100036	SLC35E4	Protein_Coding	Up-regulated	1.91815	0.00186529
ENSG00000166619	BLCAP	Protein_Coding	Up-regulated	1.44289	0.00188683
ENSG00000196975	ANXA4	Protein_Coding	Up-regulated	1.35345	0.00188683
ENSG00000165799	RNASE7	Protein_Coding	Up-regulated	6.5652	0.00192268
ENSG00000130787	HIP1R	Protein_Coding	Up-regulated	1.66796	0.00192585
ENSG00000106236	NPTX2	Protein_Coding	Up-regulated	2.36411	0.00193093
ENSG00000163110	PDLIM5	Protein_Coding	Down-regulated	-1.35951	0.00193237
ENSG00000153820	SPHKAP	Protein_Coding	Down-regulated	-2.24128	0.00194257
ENSG00000175567	UCP2	Protein_Coding	Up-regulated	1.33277	0.00199233
ENSG00000149596	JPH2	Protein_Coding	Down-regulated	-1.75361	0.00204153
ENSG00000183734	ASCL2	Protein_Coding	Up-regulated	6.65151	0.00204153
ENSG00000185070	FLRT2	Protein_Coding	Up-regulated	1.65349	0.00204153
ENSG00000088726	TMEM40	Protein_Coding	Up-regulated	4.53855	0.00213028
ENSG00000109685	NSD2	Protein_Coding	Down-regulated	-1.48845	0.00213028
ENSG00000183615	FAM167B	Protein_Coding	Down-regulated	-2.06321	0.00213028
ENSG00000090539	CHRD	Protein_Coding	Up-regulated	1.80106	0.00213696
ENSG00000260868	LINC01960	lncRNA	Up-regulated	4.53858	0.00214194
ENSG00000179743	SPEN-AS1	lncRNA	Up-regulated	2.23531	0.00214951
ENSG00000286214	COPG2IT1	lncRNA	Up-regulated	3.33345	0.00214951
ENSG00000272540	ENSG00000272540	lncRNA	Down-regulated	-2.0728	0.0021546
ENSG00000132749	TESMIN	Protein_Coding	Down-regulated	-2.55656	0.00215971
ENSG00000051825	MPHOSPH9	Protein_Coding	Down-regulated	-1.89097	0.00217681
ENSG00000135677	GNS	Protein_Coding	Up-regulated	1.3276	0.00218116
ENSG00000168685	IL7R	Protein_Coding	Down-regulated	-1.48472	0.00218116
ENSG00000223865	HLA-DPB1	Protein_Coding	Down-regulated	-1.7274	0.00218116
ENSG00000249669	CARMN	lncRNA	Down-regulated	-1.84876	0.00218116
ENSG00000145882	PCYOX1L	Protein_Coding	Up-regulated	1.6826	0.00219129
ENSG00000119986	AVPI1	Protein_Coding	Up-regulated	1.84052	0.00220871
ENSG00000144031	ANKRD53	Protein_Coding	Up-regulated	1.80547	0.00223252
ENSG00000108106	UBE2S	Protein_Coding	Down-regulated	-1.66455	0.00223855
ENSG00000154642	C21orf91	Protein_Coding	Up-regulated	1.92402	0.00227715
ENSG00000163947	ARHGEF3	Protein_Coding	Up-regulated	1.77288	0.00228894
ENSG00000173391	OLR1	Protein_Coding	Up-regulated	1.73638	0.00228894
ENSG00000151131	NOPCHAP1	Protein_Coding	Up-regulated	1.7121	0.00232319
ENSG00000143028	SYPL2	Protein_Coding	Up-regulated	1.47529	0.00235282
ENSG00000219438	TAFA5	Protein_Coding	Down-regulated	-1.76834	0.0023763
ENSG00000162892	IL24	Protein_Coding	Up-regulated	2.39375	0.00238456
ENSG00000162645	GBP2	Protein_Coding	Down-regulated	-1.63825	0.00238623
ENSG00000287260	ENSG00000287260	lncRNA	Down-regulated	-6.30618	0.00244545
ENSG00000132196	HSD17B7	Protein_Coding	Up-regulated	1.93133	0.00246744
ENSG00000184922	FMNL1	Protein_Coding	Down-regulated	-2.16089	0.00246744
ENSG00000166257	SCN3B	Protein_Coding	Up-regulated	2.98525	0.00247683
ENSG00000134198	TSPAN2	Protein_Coding	Down-regulated	-2.24769	0.00248738
ENSG00000256802	ENSG00000256802	lncRNA	Up-regulated	2.00307	0.00248738
ENSG00000060656	PTPRU	Protein_Coding	Up-regulated	1.5474	0.00250009
ENSG00000100600	LGMN	Protein_Coding	Up-regulated	1.37299	0.00250009
ENSG00000013016	EHD3	Protein_Coding	Up-regulated	1.37388	0.00250186
ENSG00000267757	EML2-AS1	lncRNA	Up-regulated	1.9519	0.00257685
ENSG00000105948	TTC26	Protein_Coding	Down-regulated	-1.80719	0.00260026
ENSG00000219626	FAM228B	Protein_Coding	Down-regulated	-1.88072	0.0026448
ENSG00000166793	YPEL4	Protein_Coding	Up-regulated	1.85699	0.00266062
ENSG00000176619	LMNB2	Protein_Coding	Down-regulated	-1.60819	0.00267081
ENSG00000145632	PLK2	Protein_Coding	Up-regulated	1.4067	0.00267657
ENSG00000169297	NR0B1	Protein_Coding	Up-regulated	1.68637	0.00268266
ENSG00000167767	KRT80	Protein_Coding	Down-regulated	-1.80878	0.00269649
ENSG00000157193	LRP8	Protein_Coding	Down-regulated	-1.84348	0.00270154
ENSG00000164236	ANKRD33B	Protein_Coding	Up-regulated	1.64605	0.00275257
ENSG00000144677	CTDSPL	Protein_Coding	Down-regulated	-1.39975	0.00281218
ENSG00000082213	C5orf22	Protein_Coding	Up-regulated	1.82957	0.00283987
ENSG00000256235	SMIM3	Protein_Coding	Up-regulated	1.56222	0.00283987
ENSG00000273796	ENSG00000273796	lncRNA	Up-regulated	1.7941	0.00283987
ENSG00000266094	RASSF5	Protein_Coding	Up-regulated	1.77716	0.00285857
ENSG00000114268	PFKFB4	Protein_Coding	Up-regulated	1.84636	0.00286341
ENSG00000143126	CELSR2	Protein_Coding	Up-regulated	1.74179	0.00290294
ENSG00000278023	RDM1	Protein_Coding	Down-regulated	-4.76595	0.00290822
ENSG00000166831	RBPMS2	Protein_Coding	Up-regulated	2.38287	0.00294266
ENSG00000107551	RASSF4	Protein_Coding	Up-regulated	1.77488	0.00294924
ENSG00000274180	NATD1	Protein_Coding	Up-regulated	1.62756	0.00297969
ENSG00000138622	HCN4	Protein_Coding	Up-regulated	3.88932	0.00300346
ENSG00000124067	SLC12A4	Protein_Coding	Up-regulated	1.66094	0.00309288
ENSG00000131470	PSMC3IP	Protein_Coding	Down-regulated	-1.56848	0.00318532
ENSG00000103495	MAZ	Protein_Coding	Down-regulated	-1.35075	0.00319493
ENSG00000236263	ENSG00000236263	lncRNA	Up-regulated	3.16698	0.0031975
ENSG00000286013	ENSG00000286013	lncRNA	Down-regulated	-1.96011	0.00322317
ENSG00000214708	ENSG00000214708	lncRNA	Up-regulated	2.92128	0.00322484
ENSG00000129667	RHBDF2	Protein_Coding	Up-regulated	1.57533	0.00324074
ENSG00000235750	KIAA0040	Protein_Coding	Up-regulated	1.6759	0.00325786
ENSG00000276791	ENSG00000276791	lncRNA	Up-regulated	4.45534	0.00327248
ENSG00000147592	LACTB2	Protein_Coding	Up-regulated	1.71312	0.00330932
ENSG00000151320	AKAP6	Protein_Coding	Down-regulated	-1.78526	0.00330932
ENSG00000169908	TM4SF1	Protein_Coding	Down-regulated	-1.94495	0.00330932
ENSG00000246877	DNM1P35	lncRNA	Up-regulated	2.438	0.00330932
ENSG00000204666	ZNF473CR	lncRNA	Up-regulated	4.70435	0.00337561
ENSG00000134668	SPOCD1	Protein_Coding	Down-regulated	-1.50073	0.00337753
ENSG00000235934	ENSG00000235934	lncRNA	Up-regulated	2.69065	0.00340666
ENSG00000172716	SLFN11	Protein_Coding	Down-regulated	-2.12356	0.0034076
ENSG00000160345	PIERCE1	Protein_Coding	Down-regulated	-1.99504	0.00342002
ENSG00000144554	FANCD2	Protein_Coding	Down-regulated	-1.6535	0.00348139
ENSG00000183508	TENT5C	Protein_Coding	Up-regulated	1.71791	0.00348672
ENSG00000181444	ZNF467	Protein_Coding	Down-regulated	-1.89279	0.00351436
ENSG00000160050	CCDC28B	Protein_Coding	Down-regulated	-1.9273	0.00353474
ENSG00000233030	ENSG00000233030	lncRNA	Up-regulated	4.43445	0.00354708
ENSG00000135047	CTSL	Protein_Coding	Up-regulated	1.39398	0.0035683
ENSG00000086289	EPDR1	Protein_Coding	Up-regulated	1.67487	0.00361659
ENSG00000147475	ERLIN2	Protein_Coding	Up-regulated	1.39367	0.00362308
ENSG00000135778	NTPCR	Protein_Coding	Up-regulated	1.4444	0.00367806
ENSG00000128965	CHAC1	Protein_Coding	Down-regulated	-1.61248	0.00370035
ENSG00000173918	C1QTNF1	Protein_Coding	Up-regulated	1.36328	0.00372724
ENSG00000116106	EPHA4	Protein_Coding	Up-regulated	1.66407	0.00373117
ENSG00000154822	PLCL2	Protein_Coding	Up-regulated	1.69668	0.00373861
ENSG00000111725	PRKAB1	Protein_Coding	Up-regulated	1.55708	0.0037804
ENSG00000265962	GACAT2	lncRNA	Up-regulated	2.51653	0.0037804
ENSG00000278637	H4C1	Protein_Coding	Down-regulated	-5.0047	0.0037953
ENSG00000233901	LINC01503	lncRNA	Up-regulated	1.82335	0.00382896
ENSG00000095383	TBC1D2	Protein_Coding	Up-regulated	1.57527	0.00385222
ENSG00000099814	CEP170B	Protein_Coding	Up-regulated	1.50315	0.00385222
ENSG00000136999	CCN3	Protein_Coding	Up-regulated	1.77456	0.00386433
ENSG00000205562	FLRT2-AS1	lncRNA	Up-regulated	1.86388	0.00386433
ENSG00000233822	H2BC15	Protein_Coding	Up-regulated	2.04348	0.00386433
ENSG00000272288	ILRUN-AS1	lncRNA	Up-regulated	1.77512	0.00386618
ENSG00000223784	LINP1	lncRNA	Up-regulated	2.95177	0.00393639
ENSG00000253227	ENSG00000253227	lncRNA	Up-regulated	2.21192	0.00394549
ENSG00000270076	ENSG00000270076	lncRNA	Up-regulated	4.86188	0.00394549
ENSG00000127337	YEATS4	Protein_Coding	Down-regulated	-1.96362	0.00399178
ENSG00000189275	LINC01164	lncRNA	Up-regulated	6.37109	0.00399264
ENSG00000275178	ENSG00000275178	lncRNA	Up-regulated	6.3836	0.00404722
ENSG00000136695	IL36RN	Protein_Coding	Up-regulated	3.51274	0.00412341
ENSG00000133619	KRBA1	Protein_Coding	Up-regulated	1.74433	0.00414547
ENSG00000178695	KCTD12	Protein_Coding	Up-regulated	1.87274	0.00416225
ENSG00000289494	ENSG00000289494	lncRNA	Up-regulated	2.29289	0.00416576
ENSG00000152495	CAMK4	Protein_Coding	Down-regulated	-2.09807	0.00425361
ENSG00000100628	ASB2	Protein_Coding	Up-regulated	6.47671	0.00431464
ENSG00000185055	EFCAB10	Protein_Coding	Up-regulated	4.38525	0.00431983
ENSG00000287712	ENSG00000287712	lncRNA	Up-regulated	6.57905	0.00431983
ENSG00000124216	SNAI1	Protein_Coding	Down-regulated	-1.67968	0.00443487
ENSG00000173221	GLRX	Protein_Coding	Up-regulated	1.38327	0.00445903
ENSG00000289307	ENSG00000289307	lncRNA	Up-regulated	3.78	0.00445903
ENSG00000137812	KNL1	Protein_Coding	Down-regulated	-2.02232	0.00447773
ENSG00000289291	ENSG00000289291	lncRNA	Up-regulated	2.82583	0.00448579
ENSG00000232859	LYRM9	Protein_Coding	Up-regulated	1.80218	0.00457268
ENSG00000158806	NPM2	Protein_Coding	Up-regulated	1.8945	0.0046081
ENSG00000054654	SYNE2	Protein_Coding	Down-regulated	-1.65068	0.00461302
ENSG00000154767	XPC	Protein_Coding	Up-regulated	1.28546	0.00462724
ENSG00000151468	CCDC3	Protein_Coding	Up-regulated	2.67078	0.00464047
ENSG00000223764	LINC02593	lncRNA	Down-regulated	-1.88487	0.00464299
ENSG00000213654	GPSM3	Protein_Coding	Down-regulated	-1.6388	0.00468353
ENSG00000135951	TSGA10	Protein_Coding	Up-regulated	2.22837	0.00470834
ENSG00000166508	MCM7	Protein_Coding	Down-regulated	-1.52501	0.00480777
ENSG00000224666	ETV7-AS1	lncRNA	Up-regulated	6.44206	0.00480777
ENSG00000109511	ANXA10	Protein_Coding	Up-regulated	6.30053	0.00482579
ENSG00000180535	BHLHA15	Protein_Coding	Up-regulated	3.12908	0.00492344
ENSG00000161011	SQSTM1	Protein_Coding	Up-regulated	1.60403	0.00493432
ENSG00000056736	IL17RB	Protein_Coding	Up-regulated	6.3262	0.0049578
ENSG00000102032	RENBP	Protein_Coding	Down-regulated	-1.87997	0.00503659
ENSG00000163071	SPATA18	Protein_Coding	Up-regulated	1.49958	0.00507991
ENSG00000167191	GPRC5B	Protein_Coding	Down-regulated	-1.70078	0.00507991
ENSG00000132879	FBXO44	Protein_Coding	Up-regulated	1.46497	0.00511736
ENSG00000082996	RNF13	Protein_Coding	Up-regulated	1.71805	0.00513114
ENSG00000174775	HRAS	Protein_Coding	Up-regulated	1.47994	0.00513114
ENSG00000119636	BBOF1	Protein_Coding	Down-regulated	-1.86471	0.00517255
ENSG00000056998	GYG2	Protein_Coding	Down-regulated	-1.65803	0.00518064
ENSG00000197721	CR1L	Protein_Coding	Up-regulated	2.27399	0.00518064
ENSG00000137959	IFI44L	Protein_Coding	Down-regulated	-1.43103	0.00520656
ENSG00000151892	GFRA1	Protein_Coding	Up-regulated	1.74636	0.00520656
ENSG00000166582	CENPV	Protein_Coding	Down-regulated	-2.04925	0.00520656
ENSG00000235609	ENSG00000235609	lncRNA	Down-regulated	-2.47706	0.00523971
ENSG00000099365	STX1B	Protein_Coding	Down-regulated	-2.0616	0.00531151
ENSG00000110203	FOLR3	Protein_Coding	Up-regulated	1.69652	0.00544035
ENSG00000204580	DDR1	Protein_Coding	Up-regulated	1.3953	0.00544035
ENSG00000085999	RAD54L	Protein_Coding	Down-regulated	-1.68455	0.00545016
ENSG00000149295	DRD2	Protein_Coding	Up-regulated	6.48034	0.00545133
ENSG00000181218	H2AC25	Protein_Coding	Up-regulated	1.92841	0.0054772
ENSG00000149557	FEZ1	Protein_Coding	Up-regulated	1.44331	0.00552315
ENSG00000230798	FOXD3-AS1	lncRNA	Up-regulated	6.33971	0.00554789
ENSG00000142731	PLK4	Protein_Coding	Down-regulated	-1.70595	0.0055705
ENSG00000288899	ENSG00000288899	lncRNA	Down-regulated	-2.81057	0.00558112
ENSG00000204219	TCEA3	Protein_Coding	Up-regulated	1.33539	0.00559237
ENSG00000126016	AMOT	Protein_Coding	Up-regulated	1.67738	0.00559911
ENSG00000125520	SLC2A4RG	Protein_Coding	Down-regulated	-1.46542	0.0056017
ENSG00000105409	ATP1A3	Protein_Coding	Down-regulated	-3.42079	0.00560864
ENSG00000114948	ADAM23	Protein_Coding	Up-regulated	1.63191	0.0056158
ENSG00000076604	TRAF4	Protein_Coding	Up-regulated	1.63597	0.00570633
ENSG00000071282	LMCD1	Protein_Coding	Up-regulated	1.47778	0.00571966
ENSG00000143819	EPHX1	Protein_Coding	Up-regulated	1.3387	0.00582975
ENSG00000147883	CDKN2B	Protein_Coding	Up-regulated	1.89654	0.00582975
ENSG00000145362	ANK2	Protein_Coding	Down-regulated	-2.62291	0.00583311
ENSG00000236914	LINC01852	lncRNA	Up-regulated	1.80836	0.00594909
ENSG00000285730	ENSG00000285730	lncRNA	Down-regulated	-2.16509	0.00594909
ENSG00000278626	ENSG00000278626	lncRNA	Up-regulated	4.59669	0.00598492
ENSG00000033627	ATP6V0A1	Protein_Coding	Up-regulated	1.3941	0.0059916
ENSG00000067082	KLF6	Protein_Coding	Down-regulated	-1.2776	0.00601122
ENSG00000160917	CPSF4	Protein_Coding	Up-regulated	1.79052	0.00601122
ENSG00000099901	RANBP1	Protein_Coding	Down-regulated	-1.37014	0.0061191
ENSG00000177984	LCN15	Protein_Coding	Up-regulated	6.25297	0.006122
ENSG00000277895	ENSG00000277895	lncRNA	Up-regulated	6.56494	0.006122
ENSG00000203288	TDRKH-AS1	lncRNA	Up-regulated	6.25298	0.00613013
ENSG00000133640	LRRIQ1	Protein_Coding	Down-regulated	-3.5137	0.00616326
ENSG00000155265	GOLGA7B	Protein_Coding	Up-regulated	2.84568	0.00616326
ENSG00000087586	AURKA	Protein_Coding	Down-regulated	-1.4961	0.00618123
ENSG00000150594	ADRA2A	Protein_Coding	Up-regulated	3.16403	0.00619419
ENSG00000132840	BHMT2	Protein_Coding	Up-regulated	1.4955	0.00627936
ENSG00000103145	HCFC1R1	Protein_Coding	Up-regulated	1.33915	0.00651244
ENSG00000152078	TLCD4	Protein_Coding	Up-regulated	3.00424	0.00655492
ENSG00000082126	MPP4	Protein_Coding	Down-regulated	-2.75726	0.00659647
ENSG00000287168	ENSG00000287168	lncRNA	Up-regulated	1.63489	0.0066296
ENSG00000258791	LINC00520	lncRNA	Up-regulated	2.17644	0.00663392
ENSG00000164985	PSIP1	Protein_Coding	Down-regulated	-1.4698	0.00664211
ENSG00000254415	SIGLEC14	Protein_Coding	Up-regulated	6.27382	0.0067081
ENSG00000177628	GBA1	Protein_Coding	Up-regulated	1.34415	0.00678433
ENSG00000287229	ENSG00000287229	lncRNA	Up-regulated	6.51616	0.00683922
ENSG00000250548	LINC01303	lncRNA	Up-regulated	4.29985	0.00686614
ENSG00000254363	ENSG00000254363	lncRNA	Down-regulated	-2.94453	0.00688652
ENSG00000126460	PRRG2	Protein_Coding	Up-regulated	6.22635	0.00697181
ENSG00000169330	MINAR1	Protein_Coding	Down-regulated	-3.10076	0.00697181
ENSG00000099338	CATSPERG	Protein_Coding	Up-regulated	2.39685	0.00701465
ENSG00000135838	NPL	Protein_Coding	Up-regulated	2.03769	0.00702548
ENSG00000105327	BBC3	Protein_Coding	Up-regulated	1.7674	0.00703938
ENSG00000169570	DTWD2	Protein_Coding	Down-regulated	-1.75976	0.00705991
ENSG00000149577	SIDT2	Protein_Coding	Up-regulated	1.45948	0.00707724
ENSG00000161800	RACGAP1	Protein_Coding	Down-regulated	-1.45225	0.00717552
ENSG00000259330	INAFM2	Protein_Coding	Up-regulated	1.33899	0.00729543
ENSG00000100399	CHADL	Protein_Coding	Up-regulated	1.85895	0.00740507
ENSG00000065621	GSTO2	Protein_Coding	Up-regulated	1.71912	0.00743802
ENSG00000168394	TAP1	Protein_Coding	Up-regulated	1.56728	0.00744057
ENSG00000197530	MIB2	Protein_Coding	Up-regulated	1.54173	0.00750459
ENSG00000240350	SOCAR	lncRNA	Up-regulated	4.52594	0.00750544
ENSG00000251095	ENSG00000251095	lncRNA	Up-regulated	6.28098	0.00754828
ENSG00000105290	APLP1	Protein_Coding	Up-regulated	1.37217	0.00760165
ENSG00000108439	PNPO	Protein_Coding	Up-regulated	1.39352	0.00760165
ENSG00000188706	ZDHHC9	Protein_Coding	Up-regulated	1.30213	0.00760165
ENSG00000230424	EMC1-AS1	lncRNA	Up-regulated	2.35197	0.00765322
ENSG00000204386	NEU1	Protein_Coding	Up-regulated	1.39642	0.00770568
ENSG00000162714	ZNF496	Protein_Coding	Down-regulated	-1.6799	0.00771907
ENSG00000159335	PTMS	Protein_Coding	Down-regulated	-1.40611	0.00786917
ENSG00000164796	CSMD3	Protein_Coding	Up-regulated	6.17617	0.00793712
ENSG00000161298	ZNF382	Protein_Coding	Down-regulated	-1.7598	0.0079427
ENSG00000176912	TYMSOS	lncRNA	Up-regulated	1.89012	0.00794387
ENSG00000247157	LINC01252	lncRNA	Down-regulated	-3.46123	0.00800758
ENSG00000116754	SRSF11	Protein_Coding	Down-regulated	-1.3217	0.00814068
ENSG00000113946	CLDN16	Protein_Coding	Up-regulated	6.21241	0.00820671
ENSG00000062822	POLD1	Protein_Coding	Down-regulated	-1.85164	0.00828911
ENSG00000102934	PLLP	Protein_Coding	Up-regulated	3.69261	0.00832659
ENSG00000197301	HMGA2-AS1	lncRNA	Up-regulated	2.71169	0.00832659
ENSG00000276527	ENSG00000276527	lncRNA	Up-regulated	3.72144	0.00840662
ENSG00000146707	POMZP3	Protein_Coding	Up-regulated	1.5304	0.00840923
ENSG00000079215	SLC1A3	Protein_Coding	Up-regulated	2.26701	0.00853
ENSG00000126861	OMG	Protein_Coding	Up-regulated	3.1793	0.00853128
ENSG00000238045	MVP-DT	lncRNA	Down-regulated	-1.61425	0.008569
ENSG00000178401	DNAJC22	Protein_Coding	Down-regulated	-2.21931	0.00857362
ENSG00000255100	TSKU-AS1	lncRNA	Up-regulated	3.12889	0.00857462
ENSG00000169105	CHST14	Protein_Coding	Up-regulated	1.22893	0.00867888
ENSG00000285744	ENSG00000285744	lncRNA	Up-regulated	1.61311	0.00869279
ENSG00000102760	RGCC	Protein_Coding	Up-regulated	2.96876	0.00880364
ENSG00000244694	PTCHD4	Protein_Coding	Up-regulated	1.56295	0.00884454
ENSG00000229951	FOSL2-AS1	lncRNA	Up-regulated	2.80264	0.00886762
ENSG00000258955	LINC00519	lncRNA	Up-regulated	1.74459	0.0089663
ENSG00000274750	H3C6	Protein_Coding	Up-regulated	1.93368	0.00904713
ENSG00000179388	EGR3	Protein_Coding	Up-regulated	6.45369	0.00905671
ENSG00000182481	KPNA2	Protein_Coding	Down-regulated	-1.23019	0.00906431
ENSG00000289560	ENSG00000289560	lncRNA	Down-regulated	-1.6192	0.00906431
ENSG00000198055	GRK6	Protein_Coding	Down-regulated	-1.47343	0.00909376
ENSG00000085831	TTC39A	Protein_Coding	Up-regulated	2.09867	0.00925247
ENSG00000263766	KPNB1-DT	lncRNA	Up-regulated	2.67549	0.00931006
ENSG00000136122	BORA	Protein_Coding	Down-regulated	-1.72682	0.00932062
ENSG00000162444	RBP7	Protein_Coding	Up-regulated	3.382	0.00932923
ENSG00000182667	NTM	Protein_Coding	Down-regulated	-1.42012	0.00935846
ENSG00000274641	H2BC17	Protein_Coding	Up-regulated	2.95759	0.00935846
ENSG00000234997	LINC02966	lncRNA	Up-regulated	2.46104	0.0093864
ENSG00000135069	PSAT1	Protein_Coding	Down-regulated	-1.18775	0.00961083
ENSG00000149633	KIAA1755	Protein_Coding	Down-regulated	-1.61426	0.00961083
ENSG00000106804	C5	Protein_Coding	Down-regulated	-1.71234	0.00968614
ENSG00000146950	SHROOM2	Protein_Coding	Up-regulated	2.61934	0.00969273
ENSG00000186638	KIF24	Protein_Coding	Down-regulated	-1.59757	0.00969877
ENSG00000145555	MYO10	Protein_Coding	Down-regulated	-1.23106	0.00969892
ENSG00000179588	ZFPM1	Protein_Coding	Up-regulated	1.41932	0.00977326
ENSG00000256940	PPP1R14B-AS1	lncRNA	Up-regulated	2.02184	0.00979379
ENSG00000065060	BLTP3A	Protein_Coding	Down-regulated	-1.49584	0.00982632
ENSG00000118785	SPP1	Protein_Coding	Up-regulated	1.77233	0.00988329
ENSG00000135919	SERPINE2	Protein_Coding	Up-regulated	1.39453	0.00988329
ENSG00000273230	ENSG00000273230	lncRNA	Up-regulated	1.78797	0.00995106
ENSG00000124657	OR2B6	Protein_Coding	Up-regulated	3.04421	0.00999541
ENSG00000118263	KLF7	Protein_Coding	Down-regulated	-1.29073	0.0100189
ENSG00000128165	ADM2	Protein_Coding	Down-regulated	-1.31816	0.0101301
ENSG00000163898	LIPH	Protein_Coding	Up-regulated	2.81392	0.0101301
ENSG00000065413	ANKRD44	Protein_Coding	Down-regulated	-2.27193	0.0101392
ENSG00000196218	RYR1	Protein_Coding	Up-regulated	3.34841	0.0101612
ENSG00000127585	FBXL16	Protein_Coding	Down-regulated	-4.4961	0.0102705
ENSG00000138944	SHISAL1	Protein_Coding	Up-regulated	1.75006	0.0103856
ENSG00000259146	SIPA1L1-AS1	lncRNA	Up-regulated	1.69198	0.0104579
ENSG00000167984	NLRC3	Protein_Coding	Up-regulated	6.10963	0.0104922
ENSG00000170577	SIX2	Protein_Coding	Up-regulated	2.72812	0.0104922
ENSG00000182612	TSPAN10	Protein_Coding	Up-regulated	1.65743	0.0104922
ENSG00000229544	NKX1-2	Protein_Coding	Up-regulated	6.10964	0.0105056
ENSG00000172548	NIPAL4	Protein_Coding	Down-regulated	-1.62531	0.0105968
ENSG00000162777	DENND2D	Protein_Coding	Up-regulated	1.57931	0.0106833
ENSG00000249639	ENSG00000249639	lncRNA	Up-regulated	3.35047	0.010724
ENSG00000101000	PROCR	Protein_Coding	Up-regulated	1.46394	0.0107262
ENSG00000089280	FUS	Protein_Coding	Down-regulated	-1.20563	0.0107823
ENSG00000205861	PCOTH	lncRNA	Up-regulated	1.91964	0.0107855
ENSG00000248099	INSL3	Protein_Coding	Up-regulated	6.22019	0.010795
ENSG00000100647	SUSD6	Protein_Coding	Up-regulated	1.31319	0.010886
ENSG00000272482	ENSG00000272482	lncRNA	Up-regulated	6.30197	0.0109365
ENSG00000261326	LINC01355	lncRNA	Down-regulated	-2.53926	0.0110134
ENSG00000241472	PTPRG-AS1	lncRNA	Down-regulated	-2.68688	0.0111038
ENSG00000272321	ENSG00000272321	lncRNA	Up-regulated	2.75472	0.0111588
ENSG00000121621	KIF18A	Protein_Coding	Down-regulated	-1.76221	0.0112429
ENSG00000169247	SH3TC2	Protein_Coding	Down-regulated	-1.70223	0.0112429
ENSG00000246898	LINC00920	lncRNA	Up-regulated	6.12444	0.0112429
ENSG00000260588	ENSG00000260588	lncRNA	Up-regulated	3.19993	0.01151
ENSG00000170425	ADORA2B	Protein_Coding	Up-regulated	1.55668	0.0115269
ENSG00000161921	CXCL16	Protein_Coding	Up-regulated	1.55535	0.0115484
ENSG00000156804	FBXO32	Protein_Coding	Up-regulated	1.23421	0.0116728
ENSG00000143867	OSR1	Protein_Coding	Up-regulated	1.75182	0.0116754
ENSG00000188229	TUBB4B	Protein_Coding	Down-regulated	-1.40217	0.0117458
ENSG00000054148	PHPT1	Protein_Coding	Up-regulated	1.54407	0.0117577
ENSG00000167680	SEMA6B	Protein_Coding	Up-regulated	3.67711	0.0117577
ENSG00000278709	NKILA	lncRNA	Up-regulated	1.68553	0.0117577
ENSG00000131080	EDA2R	Protein_Coding	Up-regulated	1.32801	0.0118058
ENSG00000204604	ZNF468	Protein_Coding	Up-regulated	1.52022	0.0118058
ENSG00000100479	POLE2	Protein_Coding	Down-regulated	-1.97736	0.0118587
ENSG00000120885	CLU	Protein_Coding	Up-regulated	1.31638	0.0118587
ENSG00000237595	LINC01275	lncRNA	Up-regulated	3.91948	0.0118587
ENSG00000235908	RHOA-IT1	lncRNA	Down-regulated	-5.94312	0.012088
ENSG00000180287	PLD5	Protein_Coding	Up-regulated	4.29582	0.0123058
ENSG00000239697	TNFSF12	Protein_Coding	Down-regulated	-1.34164	0.0123505
ENSG00000186047	DLEU7	Protein_Coding	Up-regulated	3.0574	0.0125112
ENSG00000186907	RTN4RL2	Protein_Coding	Up-regulated	2.70963	0.0125689
ENSG00000149485	FADS1	Protein_Coding	Up-regulated	1.16073	0.0125961
ENSG00000148053	NTRK2	Protein_Coding	Up-regulated	1.62846	0.0125974
ENSG00000111452	ADGRD1	Protein_Coding	Up-regulated	1.61038	0.0126409
ENSG00000288886	ENSG00000288886	lncRNA	Up-regulated	3.11699	0.0126621
ENSG00000145730	PAM	Protein_Coding	Up-regulated	1.25239	0.0126727
ENSG00000198168	SVIP	Protein_Coding	Down-regulated	-1.5897	0.0127637
ENSG00000091622	PITPNM3	Protein_Coding	Down-regulated	-2.13625	0.0127718
ENSG00000100297	MCM5	Protein_Coding	Down-regulated	-1.29469	0.0128036
ENSG00000145936	KCNMB1	Protein_Coding	Down-regulated	-1.97133	0.0128068
ENSG00000104450	SPAG1	Protein_Coding	Up-regulated	1.75042	0.0128943
ENSG00000136235	GPNMB	Protein_Coding	Up-regulated	1.24375	0.0129059
ENSG00000151414	NEK7	Protein_Coding	Down-regulated	-1.42843	0.0130109
ENSG00000138193	PLCE1	Protein_Coding	Down-regulated	-1.94515	0.013178
ENSG00000289305	ENSG00000289305	lncRNA	Up-regulated	4.1584	0.0133913
ENSG00000075624	ACTB	Protein_Coding	Down-regulated	-1.78624	0.0134349
ENSG00000196072	BLOC1S2	Protein_Coding	Up-regulated	1.32587	0.0136694
ENSG00000282943	ENSG00000282943	lncRNA	Up-regulated	3.62874	0.0136694
ENSG00000005059	MCUB	Protein_Coding	Down-regulated	-1.61273	0.0137505
ENSG00000164742	ADCY1	Protein_Coding	Up-regulated	2.15917	0.0138902
ENSG00000131015	ULBP2	Protein_Coding	Up-regulated	1.49387	0.0141176
ENSG00000128683	GAD1	Protein_Coding	Up-regulated	2.09224	0.0141474
ENSG00000140525	FANCI	Protein_Coding	Down-regulated	-1.41626	0.0141838
ENSG00000179630	LACC1	Protein_Coding	Up-regulated	1.86846	0.014185
ENSG00000169306	IL1RAPL1	Protein_Coding	Down-regulated	-2.80077	0.014204
ENSG00000067191	CACNB1	Protein_Coding	Down-regulated	-1.53541	0.0142626
ENSG00000183943	PRKX	Protein_Coding	Up-regulated	1.36275	0.0144002
ENSG00000165832	TRUB1	Protein_Coding	Up-regulated	1.64878	0.0145977
ENSG00000075568	TMEM131	Protein_Coding	Up-regulated	1.37975	0.0146313
ENSG00000115361	ACADL	Protein_Coding	Up-regulated	6.02482	0.0146856
ENSG00000170684	ZNF296	Protein_Coding	Up-regulated	1.64719	0.0148091
ENSG00000133392	MYH11	Protein_Coding	Down-regulated	-1.78369	0.0148224
ENSG00000071909	MYO3B	Protein_Coding	Up-regulated	6.04009	0.0149641
ENSG00000198157	HMGN5	Protein_Coding	Down-regulated	-1.49479	0.0149641
ENSG00000095739	BAMBI	Protein_Coding	Up-regulated	1.21358	0.0151094
ENSG00000289047	ENSG00000289047	lncRNA	Up-regulated	1.48706	0.0151094
ENSG00000003056	M6PR	Protein_Coding	Up-regulated	1.23967	0.0151644
ENSG00000260193	LINC02846	lncRNA	Up-regulated	2.89318	0.015436
ENSG00000162409	PRKAA2	Protein_Coding	Down-regulated	-1.79991	0.0156465
ENSG00000113119	TMCO6	Protein_Coding	Down-regulated	-1.69778	0.0156926
ENSG00000259275	ENSG00000259275	lncRNA	Down-regulated	-1.99146	0.0156926
ENSG00000106483	SFRP4	Protein_Coding	Up-regulated	6.00966	0.0157671
ENSG00000137135	ARHGEF39	Protein_Coding	Down-regulated	-1.65106	0.0160338
ENSG00000169258	GPRIN1	Protein_Coding	Down-regulated	-1.57343	0.0160338
ENSG00000147044	CASK	Protein_Coding	Up-regulated	1.30236	0.0160618
ENSG00000227268	KLLN	Protein_Coding	Up-regulated	1.72068	0.0161889
ENSG00000178776	C5orf46	Protein_Coding	Up-regulated	2.04661	0.0164524
ENSG00000227811	INKA2-AS1	lncRNA	Up-regulated	1.66343	0.0164524
ENSG00000123473	STIL	Protein_Coding	Down-regulated	-1.53296	0.0165097
ENSG00000124126	PREX1	Protein_Coding	Down-regulated	-1.4772	0.0165521
ENSG00000198743	SLC5A3	Protein_Coding	Up-regulated	1.66334	0.0166182
ENSG00000020577	SAMD4A	Protein_Coding	Down-regulated	-1.22605	0.0167288
ENSG00000128918	ALDH1A2	Protein_Coding	Up-regulated	2.335	0.0167288
ENSG00000102057	KCND1	Protein_Coding	Down-regulated	-1.53427	0.0167431
ENSG00000103021	CCDC113	Protein_Coding	Down-regulated	-1.62267	0.0170004
ENSG00000203805	PLPP4	Protein_Coding	Up-regulated	1.30252	0.0171107
ENSG00000187601	MAGEH1	Protein_Coding	Up-regulated	1.29838	0.0171362
ENSG00000120129	DUSP1	Protein_Coding	Down-regulated	-1.21945	0.0171995
ENSG00000173166	RAPH1	Protein_Coding	Down-regulated	-1.52853	0.0172653
ENSG00000143162	CREG1	Protein_Coding	Up-regulated	1.4861	0.0173231
ENSG00000246640	PICART1	lncRNA	Up-regulated	2.82195	0.0174029
ENSG00000231440	ENSG00000231440	lncRNA	Down-regulated	-2.92207	0.0174596
ENSG00000120699	EXOSC8	Protein_Coding	Down-regulated	-1.35347	0.0174759
ENSG00000187867	PALM3	Protein_Coding	Down-regulated	-2.20061	0.0175466
ENSG00000258777	HIF1A-AS1	lncRNA	Up-regulated	3.59464	0.0175466
ENSG00000117400	MPL	Protein_Coding	Up-regulated	3.24552	0.0176281
ENSG00000049192	ADAMTS6	Protein_Coding	Down-regulated	-1.44098	0.0176666
ENSG00000153094	BCL2L11	Protein_Coding	Up-regulated	1.5813	0.0177429
ENSG00000177674	AGTRAP	Protein_Coding	Up-regulated	1.47966	0.0177429
ENSG00000217236	SP9	Protein_Coding	Up-regulated	4.09798	0.0177429
ENSG00000258616	LINC02303	lncRNA	Up-regulated	4.09797	0.0177429
ENSG00000174721	FGFBP3	Protein_Coding	Down-regulated	-2.17916	0.0178423
ENSG00000109472	CPE	Protein_Coding	Up-regulated	2.34413	0.0178731
ENSG00000135679	MDM2	Protein_Coding	Up-regulated	1.56825	0.0178886
ENSG00000165406	MARCHF8	Protein_Coding	Up-regulated	1.25934	0.0178886
ENSG00000266208	GJD3-AS1	lncRNA	Up-regulated	1.55702	0.0178886
ENSG00000100767	PAPLN	Protein_Coding	Up-regulated	1.73882	0.0179217
ENSG00000136542	GALNT5	Protein_Coding	Up-regulated	1.4659	0.0179225
ENSG00000260000	ENSG00000260000	lncRNA	Up-regulated	1.64736	0.0180586
ENSG00000025423	HSD17B6	Protein_Coding	Down-regulated	-1.46446	0.0183568
ENSG00000068831	RASGRP2	Protein_Coding	Down-regulated	-2.37013	0.0183568
ENSG00000160801	PTH1R	Protein_Coding	Down-regulated	-1.48999	0.0183568
ENSG00000274340	ENSG00000274340	lncRNA	Up-regulated	4.11004	0.0183568
ENSG00000164989	CCDC171	Protein_Coding	Down-regulated	-2.15531	0.0183905
ENSG00000285752	CDC42-AS1	lncRNA	Up-regulated	4.07517	0.0187052
ENSG00000070159	PTPN3	Protein_Coding	Up-regulated	1.50999	0.0187487
ENSG00000138646	HERC5	Protein_Coding	Up-regulated	1.61865	0.0187487
ENSG00000149571	KIRREL3	Protein_Coding	Down-regulated	-1.50208	0.0187879
ENSG00000090013	BLVRB	Protein_Coding	Up-regulated	1.41211	0.0189771
ENSG00000248884	ENSG00000248884	lncRNA	Up-regulated	6.17458	0.0189771
ENSG00000276966	H4C5	Protein_Coding	Up-regulated	3.53062	0.0191393
ENSG00000064655	EYA2	Protein_Coding	Down-regulated	-1.65176	0.0193074
ENSG00000147100	SLC16A2	Protein_Coding	Up-regulated	1.20834	0.0193074
ENSG00000264107	MIR4733HG	lncRNA	Up-regulated	2.24618	0.0193074
ENSG00000176894	PXMP2	Protein_Coding	Down-regulated	-2.00755	0.0193234
ENSG00000164056	SPRY1	Protein_Coding	Up-regulated	1.47494	0.019333
ENSG00000185818	NAT8L	Protein_Coding	Up-regulated	1.7428	0.019333
ENSG00000196358	NTNG2	Protein_Coding	Up-regulated	1.46337	0.0194658
ENSG00000106823	ECM2	Protein_Coding	Down-regulated	-1.8717	0.0195371
ENSG00000150048	CLEC1A	Protein_Coding	Down-regulated	-2.22695	0.0196511
ENSG00000185187	SIGIRR	Protein_Coding	Down-regulated	-1.69539	0.0196511
ENSG00000100532	CGRRF1	Protein_Coding	Up-regulated	1.51955	0.0197868
ENSG00000113196	HAND1	Protein_Coding	Up-regulated	3.70595	0.0198541
ENSG00000128408	RIBC2	Protein_Coding	Down-regulated	-1.72907	0.0198747
ENSG00000130768	SMPDL3B	Protein_Coding	Up-regulated	4.12294	0.0198747
ENSG00000163710	PCOLCE2	Protein_Coding	Up-regulated	6.04807	0.0198747
ENSG00000138587	MNS1	Protein_Coding	Down-regulated	-2.48623	0.0198774
ENSG00000188505	NCCRP1	Protein_Coding	Up-regulated	6.04805	0.0198815
ENSG00000117676	RPS6KA1	Protein_Coding	Up-regulated	1.52585	0.0200009
ENSG00000277161	PIGW	Protein_Coding	Up-regulated	1.43712	0.0201191
ENSG00000259178	ENSG00000259178	lncRNA	Up-regulated	3.31731	0.0201519
ENSG00000230615	ENSG00000230615	lncRNA	Up-regulated	1.52204	0.0203597
ENSG00000266441	ARHGAP28-AS1	lncRNA	Up-regulated	6.32464	0.0204923
ENSG00000111077	TNS2	Protein_Coding	Down-regulated	-1.283	0.0205055
ENSG00000234409	CCDC188	Protein_Coding	Down-regulated	-5.7996	0.0208855
ENSG00000290083	ENSG00000290083	lncRNA	Up-regulated	5.93478	0.0209415
ENSG00000112773	TENT5A	Protein_Coding	Up-regulated	1.21535	0.0210128
ENSG00000266916	ZNF793-AS1	lncRNA	Up-regulated	2.11603	0.0210756
ENSG00000164300	SERINC5	Protein_Coding	Up-regulated	1.39124	0.0214353
ENSG00000070669	ASNS	Protein_Coding	Down-regulated	-2.59818	0.0214564
ENSG00000174501	ANKRD36C	Protein_Coding	Down-regulated	-2.13255	0.0215427
ENSG00000182165	TP53TG1	lncRNA	Up-regulated	1.54026	0.0215467
ENSG00000117472	TSPAN1	Protein_Coding	Up-regulated	2.80827	0.0217909
ENSG00000130816	DNMT1	Protein_Coding	Down-regulated	-1.20793	0.0218599
ENSG00000132185	FCRLA	Protein_Coding	Up-regulated	1.49861	0.0218599
ENSG00000182912	TSPEAR-AS2	lncRNA	Up-regulated	2.3382	0.0220126
ENSG00000054392	HHAT	Protein_Coding	Up-regulated	1.34561	0.0220568
ENSG00000121690	DEPDC7	Protein_Coding	Up-regulated	1.51979	0.0220621
ENSG00000170442	KRT86	Protein_Coding	Down-regulated	-1.93458	0.0220753
ENSG00000188827	SLX4	Protein_Coding	Down-regulated	-1.47741	0.0220753
ENSG00000108255	CRYBA1	Protein_Coding	Up-regulated	4.04791	0.0223424
ENSG00000270175	ENSG00000270175	lncRNA	Up-regulated	2.71052	0.0224279
ENSG00000182621	PLCB1	Protein_Coding	Down-regulated	-1.99625	0.0225053
ENSG00000185475	TMEM179B	Protein_Coding	Up-regulated	1.21628	0.0225053
ENSG00000125046	SSUH2	Protein_Coding	Up-regulated	3.023	0.0225073
ENSG00000101019	UQCC1	Protein_Coding	Up-regulated	1.3587	0.022687
ENSG00000163328	GPR155	Protein_Coding	Up-regulated	1.32526	0.022687
ENSG00000198947	DMD	Protein_Coding	Up-regulated	1.67095	0.022717
ENSG00000103742	IGDCC4	Protein_Coding	Up-regulated	1.46803	0.0228961
ENSG00000138686	BBS7	Protein_Coding	Up-regulated	1.43157	0.0229632
ENSG00000139354	GAS2L3	Protein_Coding	Down-regulated	-1.4374	0.0230745
ENSG00000176428	VPS37D	Protein_Coding	Up-regulated	1.6991	0.0231823
ENSG00000255471	PRSS23-AS1	lncRNA	Up-regulated	1.96905	0.0231823
ENSG00000151725	CENPU	Protein_Coding	Down-regulated	-1.44719	0.0233885
ENSG00000175274	TP53I11	Protein_Coding	Up-regulated	1.11778	0.0234169
ENSG00000140941	MAP1LC3B	Protein_Coding	Up-regulated	1.16099	0.0234203
ENSG00000108091	CCDC6	Protein_Coding	Down-regulated	-1.43364	0.023666
ENSG00000122862	SRGN	Protein_Coding	Up-regulated	1.44854	0.0238076
ENSG00000118160	SLC8A2	Protein_Coding	Up-regulated	5.91834	0.023829
ENSG00000170835	CEL	Protein_Coding	Up-regulated	2.70211	0.023829
ENSG00000187140	FOXD3	Protein_Coding	Up-regulated	5.91834	0.023829
ENSG00000100612	DHRS7	Protein_Coding	Up-regulated	1.12489	0.0239305
ENSG00000104723	TUSC3	Protein_Coding	Up-regulated	1.23444	0.0239677
ENSG00000170430	MGMT	Protein_Coding	Down-regulated	-1.47421	0.0241134
ENSG00000187193	MT1X	Protein_Coding	Down-regulated	-1.50255	0.024293
ENSG00000164283	ESM1	Protein_Coding	Up-regulated	1.77093	0.0245167
ENSG00000092036	HAUS4	Protein_Coding	Down-regulated	-1.74968	0.0245975
ENSG00000138378	STAT4	Protein_Coding	Up-regulated	1.91728	0.0245975
ENSG00000162998	FRZB	Protein_Coding	Up-regulated	2.17338	0.0245975
ENSG00000251432	LINC02615	lncRNA	Up-regulated	2.60217	0.0245975
ENSG00000077514	POLD3	Protein_Coding	Down-regulated	-1.48412	0.0246205
ENSG00000079257	LXN	Protein_Coding	Down-regulated	-1.54979	0.0247582
ENSG00000003249	DBNDD1	Protein_Coding	Up-regulated	1.42739	0.0249113
ENSG00000174514	MFSD4A	Protein_Coding	Up-regulated	2.77307	0.024957
ENSG00000231290	APCDD1L-DT	lncRNA	Down-regulated	-1.47426	0.024957
ENSG00000182916	TCEAL7	Protein_Coding	Up-regulated	1.44072	0.0250214
ENSG00000196208	GREB1	Protein_Coding	Up-regulated	2.65667	0.0251721
ENSG00000173473	SMARCC1	Protein_Coding	Down-regulated	-1.1489	0.0252366
ENSG00000105643	ARRDC2	Protein_Coding	Up-regulated	1.41147	0.025669
ENSG00000178913	TAF7	Protein_Coding	Up-regulated	1.18706	0.0260087
ENSG00000289437	ENSG00000289437	lncRNA	Down-regulated	-3.85638	0.0260087
ENSG00000178233	TMEM151B	Protein_Coding	Up-regulated	5.85574	0.0261597
ENSG00000117245	KIF17	Protein_Coding	Up-regulated	1.47796	0.0262455
ENSG00000140463	BBS4	Protein_Coding	Up-regulated	1.37019	0.0262455
ENSG00000153914	SREK1	Protein_Coding	Down-regulated	-1.19785	0.0262455
ENSG00000110042	DTX4	Protein_Coding	Up-regulated	1.53642	0.0264156
ENSG00000169379	ARL13B	Protein_Coding	Down-regulated	-1.70028	0.0264532
ENSG00000101868	POLA1	Protein_Coding	Down-regulated	-1.40714	0.0265138
ENSG00000152642	GPD1L	Protein_Coding	Up-regulated	1.45074	0.0265138
ENSG00000058056	USP13	Protein_Coding	Down-regulated	-1.42407	0.0265156
ENSG00000280721	LINC01943	lncRNA	Up-regulated	1.81631	0.0265156
ENSG00000273151	ENSG00000273151	lncRNA	Down-regulated	-5.74876	0.0265356
ENSG00000230647	ENSG00000230647	lncRNA	Up-regulated	4.07495	0.0266065
ENSG00000164877	MICALL2	Protein_Coding	Up-regulated	1.52084	0.026629
ENSG00000149929	HIRIP3	Protein_Coding	Down-regulated	-1.23111	0.0267334
ENSG00000183160	TMEM119	Protein_Coding	Up-regulated	1.14955	0.0269052
ENSG00000196923	PDLIM7	Protein_Coding	Down-regulated	-1.25118	0.0269142
ENSG00000160298	C21orf58	Protein_Coding	Down-regulated	-1.49372	0.0270604
ENSG00000116985	BMP8B	Protein_Coding	Up-regulated	6.0295	0.027103
ENSG00000107833	NPM3	Protein_Coding	Down-regulated	-1.60747	0.0271553
ENSG00000006453	BAIAP2L1	Protein_Coding	Up-regulated	1.28615	0.0271777
ENSG00000146205	ANO7	Protein_Coding	Down-regulated	-1.89224	0.0272378
ENSG00000123600	METTL8	Protein_Coding	Up-regulated	1.29535	0.027256
ENSG00000011426	ANLN	Protein_Coding	Down-regulated	-1.32797	0.0273675
ENSG00000184939	ZFP90	Protein_Coding	Up-regulated	1.28541	0.0277037
ENSG00000183111	ARHGEF37	Protein_Coding	Up-regulated	1.49411	0.0278046
ENSG00000142102	PGGHG	Protein_Coding	Down-regulated	-1.74517	0.0279509
ENSG00000105726	ATP13A1	Protein_Coding	Up-regulated	1.23545	0.0279632
ENSG00000080823	MOK	Protein_Coding	Down-regulated	-1.48479	0.0282914
ENSG00000154719	MRPL39	Protein_Coding	Up-regulated	1.26628	0.028345
ENSG00000174136	RGMB	Protein_Coding	Down-regulated	-1.11475	0.0286794
ENSG00000167799	NUDT8	Protein_Coding	Up-regulated	1.53434	0.0286974
ENSG00000196576	PLXNB2	Protein_Coding	Up-regulated	1.32963	0.0287346
ENSG00000214955	ENSG00000214955	lncRNA	Down-regulated	-5.74727	0.0287346
ENSG00000206417	H1-10-AS1	lncRNA	Down-regulated	-1.41836	0.028798
ENSG00000150782	IL18	Protein_Coding	Down-regulated	-2.86085	0.0288421
ENSG00000247095	MIR210HG	lncRNA	Down-regulated	-4.46769	0.0288421
ENSG00000135966	TGFBRAP1	Protein_Coding	Up-regulated	1.23986	0.0291542
ENSG00000185634	SHC4	Protein_Coding	Up-regulated	1.73215	0.0291542
ENSG00000012822	CALCOCO1	Protein_Coding	Up-regulated	1.10073	0.0291695
ENSG00000150722	PPP1R1C	Protein_Coding	Up-regulated	1.63631	0.0291829
ENSG00000152034	MCHR2	Protein_Coding	Up-regulated	5.89047	0.0292792
ENSG00000119969	HELLS	Protein_Coding	Down-regulated	-1.51387	0.0294283
ENSG00000178607	ERN1	Protein_Coding	Up-regulated	1.41865	0.0294756
ENSG00000172432	GTPBP2	Protein_Coding	Down-regulated	-1.23166	0.02973
ENSG00000289056	ENSG00000289056	lncRNA	Up-regulated	1.58966	0.0299209
ENSG00000109854	HTATIP2	Protein_Coding	Up-regulated	1.1621	0.0299775
ENSG00000196782	MAML3	Protein_Coding	Down-regulated	-1.44773	0.0299775
ENSG00000176723	ZNF843	Protein_Coding	Down-regulated	-2.27571	0.0301016
ENSG00000157064	NMNAT2	Protein_Coding	Down-regulated	-1.63757	0.0302225
ENSG00000231811	ENSG00000231811	lncRNA	Up-regulated	2.9053	0.0305326
ENSG00000134698	AGO4	Protein_Coding	Down-regulated	-1.35523	0.030553
ENSG00000116117	PARD3B	Protein_Coding	Down-regulated	-1.26748	0.0305563
ENSG00000284391	ENSG00000284391	lncRNA	Down-regulated	-4.22865	0.0305845
ENSG00000149609	C20orf144	Protein_Coding	Down-regulated	-5.80437	0.0307334
ENSG00000157927	RADIL	Protein_Coding	Down-regulated	-1.98664	0.0308167
ENSG00000143575	HAX1	Protein_Coding	Down-regulated	-1.10849	0.0310322
ENSG00000135002	RFK	Protein_Coding	Up-regulated	1.4477	0.0310525
ENSG00000078401	EDN1	Protein_Coding	Down-regulated	-1.41818	0.0311615
ENSG00000148925	BTBD10	Protein_Coding	Up-regulated	1.22108	0.0311615
ENSG00000141448	GATA6	Protein_Coding	Up-regulated	1.70416	0.0313681
ENSG00000140464	PML	Protein_Coding	Up-regulated	1.0931	0.0313751
ENSG00000214960	CRPPA	Protein_Coding	Up-regulated	1.51232	0.031402
ENSG00000050730	TNIP3	Protein_Coding	Down-regulated	-2.24217	0.0314941
ENSG00000169994	MYO7B	Protein_Coding	Down-regulated	-1.50521	0.0317177
ENSG00000136478	TEX2	Protein_Coding	Up-regulated	1.22715	0.031935
ENSG00000260196	ENSG00000260196	lncRNA	Up-regulated	1.49885	0.0320942
ENSG00000168386	FILIP1L	Protein_Coding	Down-regulated	-1.38347	0.0324171
ENSG00000247796	MOCS2-DT	lncRNA	Up-regulated	1.45578	0.0324357
ENSG00000123243	ITIH5	Protein_Coding	Up-regulated	1.3421	0.0324585
ENSG00000165105	RASEF	Protein_Coding	Up-regulated	3.19723	0.0325544
ENSG00000103202	NME4	Protein_Coding	Down-regulated	-1.0634	0.0326088
ENSG00000128567	PODXL	Protein_Coding	Down-regulated	-1.37479	0.0326088
ENSG00000108702	CCL1	Protein_Coding	Up-regulated	3.36623	0.0328561
ENSG00000268996	MAN1B1-DT	lncRNA	Up-regulated	1.47086	0.0328561
ENSG00000197635	DPP4	Protein_Coding	Up-regulated	1.28687	0.0332518
ENSG00000260944	FOXC2-AS1	lncRNA	Up-regulated	2.27119	0.0332531
ENSG00000143891	GALM	Protein_Coding	Down-regulated	-1.31358	0.0333651
ENSG00000236423	LINC01134	lncRNA	Up-regulated	2.47114	0.0335329
ENSG00000290644	ENSG00000290644	lncRNA	Up-regulated	1.7367	0.0335792
ENSG00000109083	IFT20	Protein_Coding	Up-regulated	1.21353	0.0337457
ENSG00000133639	BTG1	Protein_Coding	Up-regulated	1.12069	0.0339167
ENSG00000144339	TMEFF2	Protein_Coding	Up-regulated	3.34227	0.0339167
ENSG00000283563	ENSG00000283563	Protein_Coding	Up-regulated	6.02306	0.0339167
ENSG00000011009	LYPLA2	Protein_Coding	Up-regulated	1.24624	0.03392
ENSG00000011243	AKAP8L	Protein_Coding	Up-regulated	1.13342	0.0339624
ENSG00000143674	MAP3K21	Protein_Coding	Up-regulated	5.82095	0.0339624
ENSG00000155754	C2CD6	Protein_Coding	Down-regulated	-2.76095	0.0339624
ENSG00000141127	PRPSAP2	Protein_Coding	Up-regulated	1.36213	0.0340103
ENSG00000164331	ANKRA2	Protein_Coding	Up-regulated	1.33507	0.0343129
ENSG00000118960	HS1BP3	Protein_Coding	Up-regulated	1.35124	0.0344231
ENSG00000151790	TDO2	Protein_Coding	Up-regulated	1.78506	0.0344345
ENSG00000262003	ENSG00000262003	lncRNA	Up-regulated	1.45874	0.0344345
ENSG00000179598	PLD6	Protein_Coding	Up-regulated	1.61033	0.0345039
ENSG00000154188	ANGPT1	Protein_Coding	Down-regulated	-1.51878	0.0345446
ENSG00000117266	CDK18	Protein_Coding	Up-regulated	1.50801	0.0351567
ENSG00000159164	SV2A	Protein_Coding	Down-regulated	-1.26406	0.0351567
ENSG00000233077	LINC01271	lncRNA	Up-regulated	2.43397	0.0351567
ENSG00000168615	ADAM9	Protein_Coding	Up-regulated	1.27043	0.0353065
ENSG00000072832	CRMP1	Protein_Coding	Up-regulated	2.71479	0.0355157
ENSG00000142494	SLC47A1	Protein_Coding	Up-regulated	2.0165	0.0357235
ENSG00000170379	TCAF2	Protein_Coding	Up-regulated	1.46309	0.0358039
ENSG00000271784	TP53RK-DT	lncRNA	Up-regulated	2.0121	0.0359802
ENSG00000133739	LRRCC1	Protein_Coding	Down-regulated	-2.21208	0.0360165
ENSG00000185875	THNSL1	Protein_Coding	Up-regulated	1.66844	0.0361188
ENSG00000139597	N4BP2L1	Protein_Coding	Up-regulated	1.67954	0.0362232
ENSG00000152192	POU4F1	Protein_Coding	Up-regulated	6.1308	0.036346
ENSG00000147010	SH3KBP1	Protein_Coding	Down-regulated	-1.14483	0.0364766
ENSG00000156110	ADK	Protein_Coding	Up-regulated	1.15406	0.0365409
ENSG00000105254	TBCB	Protein_Coding	Down-regulated	-1.0759	0.0369791
ENSG00000197361	FBXL22	Protein_Coding	Down-regulated	-2.2792	0.037085
ENSG00000198826	ARHGAP11A	Protein_Coding	Down-regulated	-1.47548	0.0373441
ENSG00000135976	ANKRD36	Protein_Coding	Down-regulated	-2.34931	0.0374202
ENSG00000177694	NAALADL2	Protein_Coding	Down-regulated	-1.74221	0.037459
ENSG00000163406	SLC15A2	Protein_Coding	Down-regulated	-5.64009	0.0375839
ENSG00000278588	H2BC10	Protein_Coding	Down-regulated	-5.64009	0.0375839
ENSG00000109674	NEIL3	Protein_Coding	Down-regulated	-1.68136	0.0375986
ENSG00000110171	TRIM3	Protein_Coding	Up-regulated	1.32354	0.0375986
ENSG00000159399	HK2	Protein_Coding	Up-regulated	1.23427	0.0376231
ENSG00000232220	ENSG00000232220	lncRNA	Down-regulated	-2.16786	0.0376231
ENSG00000121361	KCNJ8	Protein_Coding	Up-regulated	1.4992	0.0376483
ENSG00000157456	CCNB2	Protein_Coding	Down-regulated	-1.2004	0.0378114
ENSG00000182511	FES	Protein_Coding	Down-regulated	-1.827	0.0379015
ENSG00000289559	ENSG00000289559	lncRNA	Up-regulated	5.88125	0.0379685
ENSG00000064886	CHI3L2	Protein_Coding	Up-regulated	3.07035	0.0381792
ENSG00000128245	YWHAH	Protein_Coding	Down-regulated	-1.07422	0.0381792
ENSG00000198805	PNP	Protein_Coding	Up-regulated	1.24012	0.0385537
ENSG00000163399	ATP1A1	Protein_Coding	Up-regulated	1.20101	0.0385662
ENSG00000143545	RAB13	Protein_Coding	Down-regulated	-1.17591	0.0386499
ENSG00000198046	ZNF667	Protein_Coding	Up-regulated	1.43778	0.0387061
ENSG00000260563	ENSG00000260563	lncRNA	Up-regulated	1.65654	0.0387088
ENSG00000173267	SNCG	Protein_Coding	Down-regulated	-2.36853	0.0387139
ENSG00000166289	PLEKHF1	Protein_Coding	Up-regulated	1.5255	0.03876
ENSG00000171552	BCL2L1	Protein_Coding	Up-regulated	1.17293	0.03876
ENSG00000179841	AKAP5	Protein_Coding	Down-regulated	-2.15701	0.0387775
ENSG00000168961	LGALS9	Protein_Coding	Down-regulated	-1.37058	0.038863
ENSG00000143479	DYRK3	Protein_Coding	Up-regulated	1.15995	0.0390072
ENSG00000232788	ITGA6-AS1	lncRNA	Up-regulated	5.75418	0.0390072
ENSG00000272899	ATP6V1FNB	Protein_Coding	Up-regulated	1.68945	0.0390254
ENSG00000172554	SNTG2	Protein_Coding	Down-regulated	-3.05641	0.0390607
ENSG00000174791	RIN1	Protein_Coding	Up-regulated	1.18489	0.0392747
ENSG00000176890	TYMS	Protein_Coding	Up-regulated	1.0475	0.0393102
ENSG00000229056	HECW2-AS1	lncRNA	Up-regulated	1.64368	0.039396
ENSG00000124795	DEK	Protein_Coding	Down-regulated	-1.53056	0.0394261
ENSG00000176040	TMPRSS7	Protein_Coding	Up-regulated	3.3493	0.0396415
ENSG00000115844	DLX2	Protein_Coding	Up-regulated	1.21084	0.040196
ENSG00000224043	CCNT2-AS1	lncRNA	Up-regulated	1.50818	0.040196
ENSG00000167460	TPM4	Protein_Coding	Down-regulated	-1.30896	0.0403599
ENSG00000269292	ENSG00000269292	lncRNA	Down-regulated	-2.04866	0.0403599
ENSG00000119537	KDSR	Protein_Coding	Up-regulated	1.18648	0.0405744
ENSG00000141905	NFIC	Protein_Coding	Down-regulated	-1.13808	0.0411305
ENSG00000087301	TXNDC16	Protein_Coding	Up-regulated	1.53379	0.0411341
ENSG00000008441	NFIX	Protein_Coding	Down-regulated	-1.07688	0.0411921
ENSG00000289520	ENSG00000289520	lncRNA	Down-regulated	-2.16402	0.0415277
ENSG00000179528	LBX2	Protein_Coding	Up-regulated	1.61814	0.0416075
ENSG00000136156	ITM2B	Protein_Coding	Up-regulated	1.42685	0.0416096
ENSG00000170498	KISS1	Protein_Coding	Down-regulated	-1.67719	0.0416206
ENSG00000266265	KLF14	Protein_Coding	Up-regulated	2.38717	0.0417264
ENSG00000267469	ENSG00000267469	lncRNA	Down-regulated	-1.62548	0.0417264
ENSG00000290920	ENSG00000290920	lncRNA	Up-regulated	2.17251	0.0417264
ENSG00000105655	ISYNA1	Protein_Coding	Up-regulated	1.26368	0.0418085
ENSG00000253159	PCDHGA12	Protein_Coding	Up-regulated	1.33893	0.0418597
ENSG00000115194	SLC30A3	Protein_Coding	Up-regulated	2.71679	0.0419933
ENSG00000151692	RNF144A	Protein_Coding	Up-regulated	1.55106	0.0419933
ENSG00000185760	KCNQ5	Protein_Coding	Down-regulated	-1.47489	0.0423439
ENSG00000115758	ODC1	Protein_Coding	Up-regulated	1.17684	0.0426927
ENSG00000167912	TOX-DT	lncRNA	Up-regulated	1.40475	0.0426927
ENSG00000287787	ENSG00000287787	lncRNA	Up-regulated	1.73995	0.0427345
ENSG00000058335	RASGRF1	Protein_Coding	Up-regulated	1.91342	0.0427817
ENSG00000110400	NECTIN1	Protein_Coding	Up-regulated	1.24262	0.0430709
ENSG00000236609	ZNF853	Protein_Coding	Down-regulated	-1.66769	0.0430709
ENSG00000278733	ENSG00000278733	lncRNA	Up-regulated	5.81024	0.0430709
ENSG00000139410	SDSL	Protein_Coding	Up-regulated	1.39763	0.0433866
ENSG00000124343	XG	Protein_Coding	Up-regulated	2.29072	0.0434176
ENSG00000160870	CYP3A7	Protein_Coding	Up-regulated	3.89296	0.0434318
ENSG00000142700	DMRTA2	Protein_Coding	Up-regulated	5.80107	0.0437993
ENSG00000286677	ENSG00000286677	lncRNA	Down-regulated	-3.9871	0.0438267
ENSG00000169271	HSPB3	Protein_Coding	Up-regulated	1.32626	0.0438591
ENSG00000184350	MRGPRE	Protein_Coding	Up-regulated	5.80104	0.0438657
ENSG00000290758	ENSG00000290758	lncRNA	Down-regulated	-2.16371	0.0440165
ENSG00000154678	PDE1C	Protein_Coding	Down-regulated	-1.32945	0.0443227
ENSG00000122971	ACADS	Protein_Coding	Down-regulated	-1.55045	0.0446678
ENSG00000258920	FOXN3-AS1	lncRNA	Up-regulated	1.80422	0.0447619
ENSG00000270482	ENSG00000270482	lncRNA	Up-regulated	5.73545	0.0449557
ENSG00000138829	FBN2	Protein_Coding	Up-regulated	1.03194	0.0451833
ENSG00000269970	ENSG00000269970	lncRNA	Down-regulated	-3.98802	0.0454004
ENSG00000145335	SNCA	Protein_Coding	Up-regulated	2.13071	0.0458055
ENSG00000176422	SPRYD4	Protein_Coding	Up-regulated	1.20409	0.0458747
ENSG00000262413	ENSG00000262413	lncRNA	Down-regulated	-1.41554	0.0459666
ENSG00000138092	CENPO	Protein_Coding	Down-regulated	-1.27085	0.046442
ENSG00000127241	MASP1	Protein_Coding	Up-regulated	1.06814	0.0467263
ENSG00000086544	ITPKC	Protein_Coding	Up-regulated	1.359	0.0470903
ENSG00000154721	JAM2	Protein_Coding	Up-regulated	1.74836	0.0471007
ENSG00000250007	GJD2-DT	lncRNA	Down-regulated	-2.38076	0.0472233
ENSG00000124098	FAM210B	Protein_Coding	Up-regulated	1.07632	0.0476386
ENSG00000071073	MGAT4A	Protein_Coding	Up-regulated	5.66427	0.0476523
ENSG00000105427	CNFN	Protein_Coding	Up-regulated	1.6626	0.0477186
ENSG00000144712	CAND2	Protein_Coding	Down-regulated	-1.63897	0.0477986
ENSG00000254602	MIR130AHG	lncRNA	Up-regulated	1.86524	0.0478159
ENSG00000137074	APTX	Protein_Coding	Up-regulated	1.1744	0.0479994
ENSG00000260360	ENSG00000260360	lncRNA	Up-regulated	3.50477	0.0479994
ENSG00000102409	BEX4	Protein_Coding	Up-regulated	1.31111	0.0484017
ENSG00000121064	SCPEP1	Protein_Coding	Up-regulated	1.15603	0.0484017
ENSG00000273062	RALGPS2-AS1	lncRNA	Up-regulated	2.86737	0.0486053
ENSG00000065361	ERBB3	Protein_Coding	Up-regulated	1.48587	0.0488068
ENSG00000183421	RIPK4	Protein_Coding	Up-regulated	1.50278	0.0488068
ENSG00000253522	MIR3142HG	lncRNA	Down-regulated	-3.38686	0.0490137
ENSG00000135424	ITGA7	Protein_Coding	Up-regulated	1.75609	0.0490616
ENSG00000162755	KLHDC9	Protein_Coding	Down-regulated	-2.44155	0.0494748
ENSG00000074527	NTN4	Protein_Coding	Up-regulated	1.25051	0.0496551
ENSG00000140391	TSPAN3	Protein_Coding	Up-regulated	1.07119	0.049756
ENSG00000166908	PIP4K2C	Protein_Coding	Up-regulated	1.08513	0.049756

## Sheet: Table_S4
Supplementary Table S4. List of differentially expressed protein-coding and lncRNA genes in DOX-treated cells compared to the control cells (HFFs with CRISPR-mediated p130 and RB1 knockouts, GSE135842).
Ensembl_ID	Gene_symbol	Biotype	Expression	logFC	FDR
ENSG00000166851	PLK1	Protein_Coding	Down-regulated	-6.28861	4.49e-305
ENSG00000175063	UBE2C	Protein_Coding	Down-regulated	-4.82224	4.22e-297
ENSG00000117399	CDC20	Protein_Coding	Down-regulated	-5.09809	2.39e-276
ENSG00000159388	BTG2	Protein_Coding	Up-regulated	5.07205	2.1e-255
ENSG00000162772	ATF3	Protein_Coding	Up-regulated	4.71733	4.01e-212
ENSG00000151640	DPYSL4	Protein_Coding	Up-regulated	3.9764	1.93e-209
ENSG00000055163	CYFIP2	Protein_Coding	Up-regulated	4.89898	2.27e-192
ENSG00000115129	TP53I3	Protein_Coding	Up-regulated	3.64182	3.23e-182
ENSG00000178999	AURKB	Protein_Coding	Down-regulated	-4.05335	1.17e-179
ENSG00000161513	FDXR	Protein_Coding	Up-regulated	3.32834	1.07e-174
ENSG00000090776	EFNB1	Protein_Coding	Up-regulated	3.53398	2.75e-170
ENSG00000185668	POU3F1	Protein_Coding	Up-regulated	7.32883	6e-168
ENSG00000112984	KIF20A	Protein_Coding	Down-regulated	-4.45126	2.59e-166
ENSG00000196562	SULF2	Protein_Coding	Up-regulated	4.39238	5.58e-166
ENSG00000237649	KIFC1	Protein_Coding	Down-regulated	-3.44887	4.16e-154
ENSG00000163347	CLDN1	Protein_Coding	Up-regulated	3.31997	6.68e-153
ENSG00000131747	TOP2A	Protein_Coding	Down-regulated	-4.24948	2.24e-145
ENSG00000123485	HJURP	Protein_Coding	Down-regulated	-4.00287	2.96e-145
ENSG00000164104	HMGB2	Protein_Coding	Down-regulated	-2.80687	9.09e-143
ENSG00000179163	FUCA1	Protein_Coding	Up-regulated	3.52157	8.45e-139
ENSG00000089685	BIRC5	Protein_Coding	Down-regulated	-3.68936	7.74e-137
ENSG00000119630	PGF	Protein_Coding	Up-regulated	3.26469	3.55e-131
ENSG00000149503	INCENP	Protein_Coding	Down-regulated	-3.6966	8.01e-131
ENSG00000148773	MKI67	Protein_Coding	Down-regulated	-3.69627	2.06e-129
ENSG00000183856	IQGAP3	Protein_Coding	Down-regulated	-3.63404	2.54e-127
ENSG00000130066	SAT1	Protein_Coding	Up-regulated	3.52745	4.63e-127
ENSG00000168497	CAVIN2	Protein_Coding	Up-regulated	4.42977	8.34e-127
ENSG00000013810	TACC3	Protein_Coding	Down-regulated	-2.79378	1.12e-126
ENSG00000117724	CENPF	Protein_Coding	Down-regulated	-3.74464	6.13e-126
ENSG00000135423	GLS2	Protein_Coding	Up-regulated	6.88674	1.18e-125
ENSG00000248429	GASK1B-AS1	lncRNA	Up-regulated	7.30465	2.17e-125
ENSG00000110900	TSPAN11	Protein_Coding	Up-regulated	3.84402	9.63e-125
ENSG00000104689	TNFRSF10A	Protein_Coding	Up-regulated	3.36251	4.27e-124
ENSG00000111665	CDCA3	Protein_Coding	Down-regulated	-3.67666	1.63e-123
ENSG00000197852	INKA2	Protein_Coding	Up-regulated	3.78048	1.63e-122
ENSG00000170961	HAS2	Protein_Coding	Down-regulated	-3.4844	2.45e-121
ENSG00000089486	CDIP1	Protein_Coding	Up-regulated	2.59473	4.94e-121
ENSG00000233276	GPX1	Protein_Coding	Up-regulated	2.88407	6.75e-121
ENSG00000088325	TPX2	Protein_Coding	Down-regulated	-2.63005	2.4e-119
ENSG00000164125	GASK1B	Protein_Coding	Up-regulated	6.7566	1.65e-117
ENSG00000111206	FOXM1	Protein_Coding	Down-regulated	-2.8019	2.62e-115
ENSG00000163584	RPL22L1	Protein_Coding	Down-regulated	-3.24747	9.43e-115
ENSG00000080986	NDC80	Protein_Coding	Down-regulated	-4.08184	3.69e-114
ENSG00000162496	DHRS3	Protein_Coding	Up-regulated	3.45942	1.67e-113
ENSG00000188486	H2AX	Protein_Coding	Down-regulated	-2.4786	9.49e-113
ENSG00000265763	ZNF488	Protein_Coding	Up-regulated	5.04003	2.37e-107
ENSG00000166592	RRAD	Protein_Coding	Up-regulated	3.30771	1.16e-106
ENSG00000173535	TNFRSF10C	Protein_Coding	Up-regulated	4.55662	1.33e-106
ENSG00000076382	SPAG5	Protein_Coding	Down-regulated	-3.47444	2.05e-105
ENSG00000106484	MEST	Protein_Coding	Up-regulated	4.34079	3.97e-105
ENSG00000132819	RBM38	Protein_Coding	Up-regulated	2.87035	3.57e-103
ENSG00000134057	CCNB1	Protein_Coding	Down-regulated	-3.31656	2.11e-102
ENSG00000180573	H2AC6	Protein_Coding	Up-regulated	3.09453	8.6e-101
ENSG00000075218	GTSE1	Protein_Coding	Down-regulated	-3.28181	2.09e-100
ENSG00000087586	AURKA	Protein_Coding	Down-regulated	-3.12003	3.63e-100
ENSG00000121152	NCAPH	Protein_Coding	Down-regulated	-3.67085	4.24e-98
ENSG00000168918	INPP5D	Protein_Coding	Up-regulated	4.78336	6.52e-97
ENSG00000166145	SPINT1	Protein_Coding	Up-regulated	3.51542	1.71e-94
ENSG00000079616	KIF22	Protein_Coding	Down-regulated	-2.55341	2.47e-94
ENSG00000145632	PLK2	Protein_Coding	Up-regulated	3.09439	3.53e-94
ENSG00000068489	PRR11	Protein_Coding	Down-regulated	-4.06932	5.25e-94
ENSG00000145386	CCNA2	Protein_Coding	Down-regulated	-3.67416	6.22e-94
ENSG00000154040	CABYR	Protein_Coding	Up-regulated	3.58391	9.58e-94
ENSG00000177106	EPS8L2	Protein_Coding	Up-regulated	2.67339	1.51e-93
ENSG00000138160	KIF11	Protein_Coding	Down-regulated	-3.22914	2.31e-93
ENSG00000134690	CDCA8	Protein_Coding	Down-regulated	-3.43079	2.41e-92
ENSG00000143228	NUF2	Protein_Coding	Down-regulated	-4.68271	1.23e-91
ENSG00000161888	SPC24	Protein_Coding	Down-regulated	-3.47032	1.62e-91
ENSG00000168672	LRATD2	Protein_Coding	Up-regulated	5.76438	3.16e-90
ENSG00000122966	CIT	Protein_Coding	Down-regulated	-3.55711	2.09e-88
ENSG00000186185	KIF18B	Protein_Coding	Down-regulated	-3.42314	4.23e-88
ENSG00000197093	GAL3ST4	Protein_Coding	Up-regulated	3.36446	8.73e-87
ENSG00000116717	GADD45A	Protein_Coding	Up-regulated	2.82488	1.23e-86
ENSG00000128510	CPA4	Protein_Coding	Up-regulated	3.97658	2.35e-86
ENSG00000142945	KIF2C	Protein_Coding	Down-regulated	-2.8944	2.36e-86
ENSG00000110876	SELPLG	Protein_Coding	Up-regulated	3.15641	3.55e-86
ENSG00000103202	NME4	Protein_Coding	Down-regulated	-2.35983	9.97e-86
ENSG00000133131	MORC4	Protein_Coding	Up-regulated	2.83348	6.16e-85
ENSG00000164237	CMBL	Protein_Coding	Up-regulated	2.55381	1.98e-84
ENSG00000120889	TNFRSF10B	Protein_Coding	Up-regulated	2.56748	8.29e-84
ENSG00000154839	SKA1	Protein_Coding	Down-regulated	-3.50528	1.54e-83
ENSG00000171241	SHCBP1	Protein_Coding	Down-regulated	-3.38792	2.16e-83
ENSG00000277287	ENSG00000277287	lncRNA	Up-regulated	3.61091	3.08e-83
ENSG00000109805	NCAPG	Protein_Coding	Down-regulated	-2.77628	3.58e-82
ENSG00000152253	SPC25	Protein_Coding	Down-regulated	-4.23939	4.26e-82
ENSG00000080546	SESN1	Protein_Coding	Up-regulated	2.86848	2.03e-81
ENSG00000156970	BUB1B	Protein_Coding	Down-regulated	-4.93717	4.68e-81
ENSG00000260912	ENSG00000260912	lncRNA	Up-regulated	4.66788	5.28e-80
ENSG00000196730	DAPK1	Protein_Coding	Up-regulated	5.09359	5.35e-80
ENSG00000186193	SAPCD2	Protein_Coding	Down-regulated	-3.75859	1.4e-79
ENSG00000138061	CYP1B1	Protein_Coding	Up-regulated	2.77133	3.11e-79
ENSG00000111981	ULBP1	Protein_Coding	Up-regulated	4.22999	3.77e-79
ENSG00000164938	TP53INP1	Protein_Coding	Up-regulated	3.15257	1.36e-78
ENSG00000198826	ARHGAP11A	Protein_Coding	Down-regulated	-3.49831	3.75e-78
ENSG00000003137	CYP26B1	Protein_Coding	Up-regulated	2.81592	2.32e-77
ENSG00000138166	DUSP5	Protein_Coding	Up-regulated	2.02451	3.15e-77
ENSG00000134574	DDB2	Protein_Coding	Up-regulated	2.22503	8.08e-77
ENSG00000071539	TRIP13	Protein_Coding	Down-regulated	-2.86116	8.65e-77
ENSG00000104228	TRIM35	Protein_Coding	Up-regulated	2.28407	5.3e-76
ENSG00000165480	SKA3	Protein_Coding	Down-regulated	-3.56284	5.47e-76
ENSG00000136378	ADAMTS7	Protein_Coding	Up-regulated	3.02912	6.12e-76
ENSG00000169679	BUB1	Protein_Coding	Down-regulated	-4.40988	6.32e-76
ENSG00000274180	NATD1	Protein_Coding	Up-regulated	2.78676	7.96e-76
ENSG00000090889	KIF4A	Protein_Coding	Down-regulated	-3.57698	1.11e-75
ENSG00000167992	VWCE	Protein_Coding	Up-regulated	4.17457	1.27e-75
ENSG00000137807	KIF23	Protein_Coding	Down-regulated	-3.10299	6.26e-75
ENSG00000177595	PIDD1	Protein_Coding	Up-regulated	2.20842	1.21e-74
ENSG00000172890	NADSYN1	Protein_Coding	Up-regulated	1.99437	6.54e-74
ENSG00000162643	DNAI3	Protein_Coding	Up-regulated	4.76856	3.53e-73
ENSG00000128567	PODXL	Protein_Coding	Down-regulated	-2.75962	8.68e-73
ENSG00000011426	ANLN	Protein_Coding	Down-regulated	-2.77297	1e-72
ENSG00000143816	WNT9A	Protein_Coding	Up-regulated	4.64934	6.79e-71
ENSG00000116106	EPHA4	Protein_Coding	Up-regulated	3.94107	6.9e-71
ENSG00000078237	TIGAR	Protein_Coding	Up-regulated	2.67174	1.02e-69
ENSG00000135679	MDM2	Protein_Coding	Up-regulated	2.30756	2.16e-69
ENSG00000128422	KRT17	Protein_Coding	Up-regulated	3.29441	5.01e-69
ENSG00000158373	H2BC5	Protein_Coding	Up-regulated	2.78318	8.33e-69
ENSG00000172828	CES3	Protein_Coding	Up-regulated	8.38106	1.2e-68
ENSG00000102804	TSC22D1	Protein_Coding	Up-regulated	2.06459	1.95e-68
ENSG00000142619	PADI3	Protein_Coding	Up-regulated	7.56259	2.08e-68
ENSG00000143401	ANP32E	Protein_Coding	Down-regulated	-2.63566	6.33e-68
ENSG00000242732	RTL5	Protein_Coding	Up-regulated	2.6656	7.73e-68
ENSG00000138778	CENPE	Protein_Coding	Down-regulated	-4.49736	8.25e-68
ENSG00000108106	UBE2S	Protein_Coding	Down-regulated	-1.89263	1.63e-67
ENSG00000177076	ACER2	Protein_Coding	Up-regulated	5.70733	2.91e-67
ENSG00000157456	CCNB2	Protein_Coding	Down-regulated	-2.92137	3.07e-67
ENSG00000161642	ZNF385A	Protein_Coding	Up-regulated	2.47408	6.86e-67
ENSG00000140682	TGFB1I1	Protein_Coding	Down-regulated	-2.09973	8.5e-67
ENSG00000066279	ASPM	Protein_Coding	Down-regulated	-4.93993	1.03e-66
ENSG00000152229	PSTPIP2	Protein_Coding	Up-regulated	2.86524	1.26e-66
ENSG00000013016	EHD3	Protein_Coding	Up-regulated	2.18947	3.34e-66
ENSG00000132274	TRIM22	Protein_Coding	Up-regulated	2.50453	3.49e-66
ENSG00000160606	TLCD1	Protein_Coding	Up-regulated	2.53751	1e-65
ENSG00000117335	CD46	Protein_Coding	Up-regulated	2.15277	5.54e-65
ENSG00000115884	SDC1	Protein_Coding	Up-regulated	2.26562	1.33e-64
ENSG00000178184	PARD6G	Protein_Coding	Up-regulated	3.36572	1.89e-64
ENSG00000175274	TP53I11	Protein_Coding	Up-regulated	1.81936	4.31e-63
ENSG00000136826	KLF4	Protein_Coding	Up-regulated	4.51554	6.42e-63
ENSG00000170836	PPM1D	Protein_Coding	Up-regulated	2.40772	7.82e-63
ENSG00000169242	EFNA1	Protein_Coding	Up-regulated	5.38276	9.52e-63
ENSG00000095397	WHRN	Protein_Coding	Up-regulated	2.93559	1.18e-62
ENSG00000119986	AVPI1	Protein_Coding	Up-regulated	2.12495	1.31e-62
ENSG00000130787	HIP1R	Protein_Coding	Up-regulated	2.38907	1.38e-62
ENSG00000289194	ENSG00000289194	lncRNA	Down-regulated	-4.31314	2.18e-62
ENSG00000126787	DLGAP5	Protein_Coding	Down-regulated	-3.98562	3.47e-62
ENSG00000143772	ITPKB	Protein_Coding	Up-regulated	2.51768	7.5e-62
ENSG00000144452	ABCA12	Protein_Coding	Up-regulated	8.07964	2.67e-61
ENSG00000128917	DLL4	Protein_Coding	Down-regulated	-2.3617	7.26e-61
ENSG00000170385	SLC30A1	Protein_Coding	Up-regulated	3.42877	1.41e-60
ENSG00000117650	NEK2	Protein_Coding	Down-regulated	-3.97866	3.3e-60
ENSG00000172831	CES2	Protein_Coding	Up-regulated	2.20134	3.37e-60
ENSG00000129474	AJUBA	Protein_Coding	Up-regulated	1.87793	5.5e-60
ENSG00000024526	DEPDC1	Protein_Coding	Down-regulated	-4.54578	7.07e-60
ENSG00000196152	ZNF79	Protein_Coding	Up-regulated	2.79553	1.3e-59
ENSG00000163071	SPATA18	Protein_Coding	Up-regulated	2.72765	2.35e-59
ENSG00000180155	LYNX1	Protein_Coding	Up-regulated	2.53475	2.39e-59
ENSG00000130766	SESN2	Protein_Coding	Up-regulated	2.05693	3.27e-59
ENSG00000198074	AKR1B10	Protein_Coding	Up-regulated	4.77064	4.1e-59
ENSG00000159055	MIS18A	Protein_Coding	Down-regulated	-2.81876	4.62e-59
ENSG00000196975	ANXA4	Protein_Coding	Up-regulated	1.76399	7.61e-59
ENSG00000184678	H2BC21	Protein_Coding	Up-regulated	3.11726	1.65e-58
ENSG00000134222	PSRC1	Protein_Coding	Down-regulated	-2.77218	1.92e-58
ENSG00000183114	FAM43B	Protein_Coding	Up-regulated	3.42704	2.03e-58
ENSG00000118193	KIF14	Protein_Coding	Down-regulated	-4.20592	5.71e-58
ENSG00000065054	SLC9A3R2	Protein_Coding	Down-regulated	-1.9123	8.75e-58
ENSG00000069812	HES2	Protein_Coding	Up-regulated	5.86284	1.39e-57
ENSG00000115641	FHL2	Protein_Coding	Up-regulated	1.80316	1.83e-57
ENSG00000129810	SGO1	Protein_Coding	Down-regulated	-4.106	3.4e-57
ENSG00000104419	NDRG1	Protein_Coding	Up-regulated	1.76866	4.92e-57
ENSG00000111725	PRKAB1	Protein_Coding	Up-regulated	2.18419	5.97e-57
ENSG00000151689	INPP1	Protein_Coding	Up-regulated	2.01291	1.54e-56
ENSG00000187091	PLCD1	Protein_Coding	Up-regulated	2.07158	2.05e-56
ENSG00000182253	SYNM	Protein_Coding	Up-regulated	2.3455	2.51e-56
ENSG00000136003	ISCU	Protein_Coding	Up-regulated	1.85625	2.89e-56
ENSG00000113810	SMC4	Protein_Coding	Down-regulated	-2.43489	3.66e-56
ENSG00000186871	ERCC6L	Protein_Coding	Down-regulated	-4.30648	3.81e-56
ENSG00000173846	PLK3	Protein_Coding	Up-regulated	1.88082	4.31e-56
ENSG00000120738	EGR1	Protein_Coding	Up-regulated	2.5074	4.49e-56
ENSG00000166619	BLCAP	Protein_Coding	Up-regulated	1.64158	8.86e-56
ENSG00000072571	HMMR	Protein_Coding	Down-regulated	-3.40578	1.09e-55
ENSG00000130821	SLC6A8	Protein_Coding	Up-regulated	2.0594	1.23e-55
ENSG00000240891	PLCXD2	Protein_Coding	Up-regulated	4.03443	1.34e-55
ENSG00000159753	CARMIL2	Protein_Coding	Down-regulated	-3.2349	3.14e-55
ENSG00000138180	CEP55	Protein_Coding	Down-regulated	-2.83192	3.42e-55
ENSG00000164050	PLXNB1	Protein_Coding	Up-regulated	2.23745	3.9e-55
ENSG00000198901	PRC1	Protein_Coding	Down-regulated	-4.54799	5.56e-55
ENSG00000144485	HES6	Protein_Coding	Up-regulated	3.46683	1.81e-54
ENSG00000265096	C1QTNF1-AS1	lncRNA	Up-regulated	4.7693	3.58e-54
ENSG00000100439	ABHD4	Protein_Coding	Up-regulated	1.85677	3.68e-54
ENSG00000115163	CENPA	Protein_Coding	Down-regulated	-4.01776	4.93e-54
ENSG00000124635	H2BC11	Protein_Coding	Up-regulated	3.30803	5.56e-54
ENSG00000010030	ETV7	Protein_Coding	Up-regulated	3.29777	6.25e-54
ENSG00000138182	KIF20B	Protein_Coding	Down-regulated	-3.15982	7.3e-54
ENSG00000107099	DOCK8	Protein_Coding	Up-regulated	5.75081	9.72e-54
ENSG00000135476	ESPL1	Protein_Coding	Down-regulated	-2.52022	1.78e-53
ENSG00000173156	RHOD	Protein_Coding	Up-regulated	2.08367	2.59e-53
ENSG00000135451	TROAP	Protein_Coding	Down-regulated	-2.87808	1.36e-52
ENSG00000146670	CDCA5	Protein_Coding	Down-regulated	-2.20637	1.69e-52
ENSG00000182704	TSKU	Protein_Coding	Up-regulated	2.12451	2.02e-52
ENSG00000042445	RETSAT	Protein_Coding	Up-regulated	1.79734	3.34e-52
ENSG00000181026	AEN	Protein_Coding	Up-regulated	1.58112	4.74e-52
ENSG00000213722	DDAH2	Protein_Coding	Down-regulated	-2.42781	7.12e-52
ENSG00000102384	CENPI	Protein_Coding	Down-regulated	-2.54776	1e-51
ENSG00000118503	TNFAIP3	Protein_Coding	Up-regulated	1.82869	1.24e-51
ENSG00000177098	SCN4B	Protein_Coding	Up-regulated	4.57317	2.97e-51
ENSG00000128965	CHAC1	Protein_Coding	Down-regulated	-2.29356	4.28e-51
ENSG00000253368	TRNP1	Protein_Coding	Down-regulated	-1.64735	2.11e-50
ENSG00000108947	EFNB3	Protein_Coding	Down-regulated	-5.95022	2.67e-50
ENSG00000060656	PTPRU	Protein_Coding	Up-regulated	1.90007	3.13e-50
ENSG00000073756	PTGS2	Protein_Coding	Down-regulated	-1.85425	6.02e-50
ENSG00000167196	FBXO22	Protein_Coding	Up-regulated	1.81484	6.02e-50
ENSG00000184661	CDCA2	Protein_Coding	Down-regulated	-2.72176	6.14e-50
ENSG00000185187	SIGIRR	Protein_Coding	Down-regulated	-3.08057	6.24e-50
ENSG00000125965	GDF5	Protein_Coding	Up-regulated	3.0774	1.07e-49
ENSG00000082438	COBLL1	Protein_Coding	Up-regulated	2.27882	1.09e-49
ENSG00000165272	AQP3	Protein_Coding	Up-regulated	4.16689	1.33e-49
ENSG00000169715	MT1E	Protein_Coding	Down-regulated	-2.06894	1.69e-49
ENSG00000076604	TRAF4	Protein_Coding	Up-regulated	1.71811	6.65e-49
ENSG00000277586	NEFL	Protein_Coding	Up-regulated	3.82284	8.06e-49
ENSG00000188916	INSYN2A	Protein_Coding	Up-regulated	5.33249	1.36e-48
ENSG00000137975	CLCA2	Protein_Coding	Up-regulated	4.03905	1.42e-48
ENSG00000158402	CDC25C	Protein_Coding	Down-regulated	-3.3591	2.98e-48
ENSG00000130513	GDF15	Protein_Coding	Up-regulated	3.29787	6e-48
ENSG00000167034	NKX3-1	Protein_Coding	Up-regulated	2.62262	1.08e-47
ENSG00000186994	KANK3	Protein_Coding	Up-regulated	10.0812	1.3e-47
ENSG00000134107	BHLHE40	Protein_Coding	Up-regulated	2.13814	1.32e-47
ENSG00000166016	ABTB2	Protein_Coding	Up-regulated	2.70155	1.41e-47
ENSG00000164236	ANKRD33B	Protein_Coding	Up-regulated	2.8966	2.27e-47
ENSG00000090020	SLC9A1	Protein_Coding	Up-regulated	1.92154	2.79e-47
ENSG00000223573	TINCR	Protein_Coding	Up-regulated	6.85051	2.79e-47
ENSG00000180875	GREM2	Protein_Coding	Down-regulated	-2.02352	3.78e-47
ENSG00000099889	ARVCF	Protein_Coding	Up-regulated	2.81197	4.02e-47
ENSG00000065320	NTN1	Protein_Coding	Up-regulated	4.17224	4.46e-47
ENSG00000128944	KNSTRN	Protein_Coding	Down-regulated	-2.1668	6.39e-47
ENSG00000182481	KPNA2	Protein_Coding	Down-regulated	-1.98403	6.46e-47
ENSG00000112742	TTK	Protein_Coding	Down-regulated	-3.8612	2.08e-46
ENSG00000133619	KRBA1	Protein_Coding	Up-regulated	2.07716	2.56e-46
ENSG00000165406	MARCHF8	Protein_Coding	Up-regulated	2.06545	4.09e-46
ENSG00000100526	CDKN3	Protein_Coding	Down-regulated	-2.31594	4.46e-46
ENSG00000162063	CCNF	Protein_Coding	Down-regulated	-1.82156	6.34e-46
ENSG00000094914	AAAS	Protein_Coding	Down-regulated	-1.76	7.29e-46
ENSG00000102996	MMP15	Protein_Coding	Up-regulated	2.00198	8.99e-46
ENSG00000131080	EDA2R	Protein_Coding	Up-regulated	1.98859	2.24e-45
ENSG00000196787	H2AC11	Protein_Coding	Up-regulated	5.29567	2.24e-45
ENSG00000153250	RBMS1	Protein_Coding	Down-regulated	-1.59703	2.44e-45
ENSG00000155090	KLF10	Protein_Coding	Up-regulated	1.63304	3.11e-45
ENSG00000105327	BBC3	Protein_Coding	Up-regulated	2.28085	3.28e-45
ENSG00000164070	HSPA4L	Protein_Coding	Up-regulated	2.83144	3.34e-45
ENSG00000272841	MAP3K4-AS1	lncRNA	Up-regulated	2.88677	1.17e-44
ENSG00000126453	BCL2L12	Protein_Coding	Down-regulated	-1.93101	1.41e-44
ENSG00000187017	ESPN	Protein_Coding	Up-regulated	9.96257	2.58e-44
ENSG00000137812	KNL1	Protein_Coding	Down-regulated	-3.65511	2.8e-44
ENSG00000171469	ZNF561	Protein_Coding	Up-regulated	2.24482	4.81e-44
ENSG00000163545	NUAK2	Protein_Coding	Up-regulated	1.78947	5.45e-44
ENSG00000189410	SH2D5	Protein_Coding	Up-regulated	2.97881	8.55e-44
ENSG00000126368	NR1D1	Protein_Coding	Up-regulated	1.51594	8.73e-44
ENSG00000198743	SLC5A3	Protein_Coding	Up-regulated	2.03453	8.98e-44
ENSG00000062038	CDH3	Protein_Coding	Up-regulated	5.27975	1.06e-43
ENSG00000131979	GCH1	Protein_Coding	Up-regulated	3.05754	1.07e-43
ENSG00000122877	EGR2	Protein_Coding	Up-regulated	3.40158	1.11e-43
ENSG00000147573	TRIM55	Protein_Coding	Up-regulated	1.6505	1.77e-43
ENSG00000125657	TNFSF9	Protein_Coding	Up-regulated	3.68887	2.96e-43
ENSG00000129195	PIMREG	Protein_Coding	Down-regulated	-2.35022	6.01e-43
ENSG00000147883	CDKN2B	Protein_Coding	Up-regulated	2.76869	1.38e-42
ENSG00000175567	UCP2	Protein_Coding	Up-regulated	2.12891	1.5e-42
ENSG00000157873	TNFRSF14	Protein_Coding	Up-regulated	2.06975	1.49e-41
ENSG00000108950	FAM20A	Protein_Coding	Up-regulated	2.95278	1.51e-41
ENSG00000235750	KIAA0040	Protein_Coding	Up-regulated	1.92449	1.51e-41
ENSG00000121621	KIF18A	Protein_Coding	Down-regulated	-3.08826	2.1e-41
ENSG00000128342	LIF	Protein_Coding	Up-regulated	1.95575	2.32e-41
ENSG00000178607	ERN1	Protein_Coding	Up-regulated	2.09768	2.76e-41
ENSG00000270885	RASL10B	Protein_Coding	Down-regulated	-3.26237	3.12e-41
ENSG00000164294	GPX8	Protein_Coding	Down-regulated	-1.65324	3.84e-41
ENSG00000116514	RNF19B	Protein_Coding	Up-regulated	2.10855	6.94e-41
ENSG00000136859	ANGPTL2	Protein_Coding	Up-regulated	1.69215	1.29e-40
ENSG00000115758	ODC1	Protein_Coding	Up-regulated	1.68606	1.5e-40
ENSG00000213347	MXD3	Protein_Coding	Down-regulated	-2.65393	2.24e-40
ENSG00000084693	AGBL5	Protein_Coding	Up-regulated	1.78449	2.7e-40
ENSG00000079308	TNS1	Protein_Coding	Down-regulated	-1.75089	3.94e-40
ENSG00000170312	CDK1	Protein_Coding	Down-regulated	-2.98749	4.42e-40
ENSG00000071282	LMCD1	Protein_Coding	Up-regulated	1.95576	5.03e-40
ENSG00000087085	ACHE	Protein_Coding	Up-regulated	4.43378	6.86e-40
ENSG00000289560	ENSG00000289560	lncRNA	Down-regulated	-3.08326	9.83e-40
ENSG00000013297	CLDN11	Protein_Coding	Up-regulated	2.81138	1.07e-39
ENSG00000052850	ALX4	Protein_Coding	Up-regulated	2.47349	1.07e-39
ENSG00000105825	TFPI2	Protein_Coding	Up-regulated	1.87206	1.09e-39
ENSG00000135926	TMBIM1	Protein_Coding	Up-regulated	1.67821	1.09e-39
ENSG00000026103	FAS	Protein_Coding	Up-regulated	1.98099	1.19e-39
ENSG00000168824	NSG1	Protein_Coding	Up-regulated	7.42093	1.56e-39
ENSG00000111452	ADGRD1	Protein_Coding	Up-regulated	2.74439	1.66e-39
ENSG00000166897	ELFN2	Protein_Coding	Up-regulated	2.50679	1.75e-39
ENSG00000182175	RGMA	Protein_Coding	Up-regulated	3.60054	1.75e-39
ENSG00000145147	SLIT2	Protein_Coding	Up-regulated	2.05413	1.82e-39
ENSG00000182541	LIMK2	Protein_Coding	Up-regulated	1.74478	2.11e-39
ENSG00000282988	ENSG00000282988	Protein_Coding	Up-regulated	4.1506	2.15e-39
ENSG00000173391	OLR1	Protein_Coding	Up-regulated	1.89936	3.85e-39
ENSG00000132517	SLC52A1	Protein_Coding	Up-regulated	6.93569	4.27e-39
ENSG00000048392	RRM2B	Protein_Coding	Up-regulated	2.32572	4.97e-39
ENSG00000147010	SH3KBP1	Protein_Coding	Down-regulated	-1.48942	5.3e-39
ENSG00000138646	HERC5	Protein_Coding	Up-regulated	2.26167	5.47e-39
ENSG00000145012	LPP	Protein_Coding	Down-regulated	-1.55825	6.89e-39
ENSG00000099814	CEP170B	Protein_Coding	Up-regulated	1.54134	1.18e-38
ENSG00000075702	WDR62	Protein_Coding	Down-regulated	-1.98501	1.27e-38
ENSG00000272081	FCHO2-DT	lncRNA	Up-regulated	6.53758	1.95e-38
ENSG00000136114	THSD1	Protein_Coding	Up-regulated	3.51548	3.54e-38
ENSG00000136156	ITM2B	Protein_Coding	Up-regulated	1.38934	3.98e-38
ENSG00000120875	DUSP4	Protein_Coding	Up-regulated	1.98539	4.87e-38
ENSG00000092068	SLC7A8	Protein_Coding	Up-regulated	2.18793	6.22e-38
ENSG00000141052	MYOCD	Protein_Coding	Down-regulated	-1.45792	7.03e-38
ENSG00000103723	AP3B2	Protein_Coding	Up-regulated	3.24436	7.11e-38
ENSG00000152137	HSPB8	Protein_Coding	Up-regulated	1.48252	1.35e-37
ENSG00000137831	UACA	Protein_Coding	Down-regulated	-1.42766	1.86e-37
ENSG00000188825	LINC00910	lncRNA	Up-regulated	2.98583	2.19e-37
ENSG00000023608	SNAPC1	Protein_Coding	Up-regulated	2.17924	2.67e-37
ENSG00000151131	NOPCHAP1	Protein_Coding	Up-regulated	1.85162	2.67e-37
ENSG00000189403	HMGB1	Protein_Coding	Down-regulated	-1.40194	3.58e-37
ENSG00000103145	HCFC1R1	Protein_Coding	Up-regulated	1.63695	3.89e-37
ENSG00000111642	CHD4	Protein_Coding	Down-regulated	-1.666	3.89e-37
ENSG00000105254	TBCB	Protein_Coding	Down-regulated	-1.36354	4.07e-37
ENSG00000095383	TBC1D2	Protein_Coding	Up-regulated	1.46074	4.76e-37
ENSG00000095203	EPB41L4B	Protein_Coding	Up-regulated	3.95772	4.81e-37
ENSG00000171848	RRM2	Protein_Coding	Down-regulated	-1.57181	1.98e-36
ENSG00000146707	POMZP3	Protein_Coding	Up-regulated	2.31868	2.41e-36
ENSG00000137463	MGARP	Protein_Coding	Up-regulated	2.42178	2.66e-36
ENSG00000171444	MCC	Protein_Coding	Up-regulated	2.40802	3.2e-36
ENSG00000013588	GPRC5A	Protein_Coding	Up-regulated	1.5668	3.43e-36
ENSG00000113758	DBN1	Protein_Coding	Down-regulated	-1.5537	4.61e-36
ENSG00000188153	COL4A5	Protein_Coding	Up-regulated	3.59761	5.66e-36
ENSG00000197530	MIB2	Protein_Coding	Up-regulated	1.63637	6.84e-36
ENSG00000243137	PSG4	Protein_Coding	Up-regulated	1.37624	7.99e-36
ENSG00000088836	SLC4A11	Protein_Coding	Up-regulated	2.14829	1.28e-35
ENSG00000184939	ZFP90	Protein_Coding	Up-regulated	1.98997	1.4e-35
ENSG00000076706	MCAM	Protein_Coding	Down-regulated	-1.71309	1.97e-35
ENSG00000105137	SYDE1	Protein_Coding	Down-regulated	-1.43406	2.26e-35
ENSG00000204580	DDR1	Protein_Coding	Up-regulated	1.57327	2.33e-35
ENSG00000171246	NPTX1	Protein_Coding	Up-regulated	1.87295	3.55e-35
ENSG00000054148	PHPT1	Protein_Coding	Up-regulated	1.47677	5.15e-35
ENSG00000148175	STOM	Protein_Coding	Up-regulated	1.6975	5.26e-35
ENSG00000136999	CCN3	Protein_Coding	Up-regulated	1.61884	5.67e-35
ENSG00000277075	H2AC8	Protein_Coding	Up-regulated	3.86537	5.82e-35
ENSG00000153914	SREK1	Protein_Coding	Down-regulated	-1.85505	6.65e-35
ENSG00000107485	GATA3	Protein_Coding	Up-regulated	2.87489	1.03e-34
ENSG00000244486	SCARF2	Protein_Coding	Down-regulated	-1.4448	1.04e-34
ENSG00000148400	NOTCH1	Protein_Coding	Up-regulated	1.69912	1.83e-34
ENSG00000175745	NR2F1	Protein_Coding	Down-regulated	-1.73427	1.85e-34
ENSG00000012822	CALCOCO1	Protein_Coding	Up-regulated	1.50189	2.18e-34
ENSG00000112715	VEGFA	Protein_Coding	Up-regulated	1.54698	2.19e-34
ENSG00000173641	HSPB7	Protein_Coding	Down-regulated	-2.1369	2.82e-34
ENSG00000134326	CMPK2	Protein_Coding	Up-regulated	2.0532	2.89e-34
ENSG00000146232	NFKBIE	Protein_Coding	Up-regulated	1.79258	4.06e-34
ENSG00000280721	LINC01943	lncRNA	Up-regulated	2.75933	4.28e-34
ENSG00000185634	SHC4	Protein_Coding	Up-regulated	2.35841	4.31e-34
ENSG00000078900	TP73	Protein_Coding	Up-regulated	3.38028	4.63e-34
ENSG00000115415	STAT1	Protein_Coding	Up-regulated	1.76043	6.19e-34
ENSG00000136542	GALNT5	Protein_Coding	Up-regulated	1.86732	6.48e-34
ENSG00000261801	LOXL1-AS1	lncRNA	Down-regulated	-2.26703	7.4e-34
ENSG00000077152	UBE2T	Protein_Coding	Down-regulated	-1.76124	7.95e-34
ENSG00000125148	MT2A	Protein_Coding	Down-regulated	-2.75393	8.99e-34
ENSG00000168394	TAP1	Protein_Coding	Up-regulated	1.81554	9.87e-34
ENSG00000237989	LINC01679	lncRNA	Up-regulated	2.44244	1.64e-33
ENSG00000171867	PRNP	Protein_Coding	Up-regulated	1.57884	1.83e-33
ENSG00000143819	EPHX1	Protein_Coding	Up-regulated	1.29721	1.97e-33
ENSG00000125827	TMX4	Protein_Coding	Up-regulated	1.56017	2.56e-33
ENSG00000091640	SPAG7	Protein_Coding	Down-regulated	-1.3867	2.93e-33
ENSG00000133106	EPSTI1	Protein_Coding	Up-regulated	1.87858	3.48e-33
ENSG00000126602	TRAP1	Protein_Coding	Down-regulated	-1.41856	3.66e-33
ENSG00000072195	SPEG	Protein_Coding	Down-regulated	-1.95565	5.64e-33
ENSG00000135390	ATP5MC2	Protein_Coding	Down-regulated	-1.35551	7.17e-33
ENSG00000285744	ENSG00000285744	lncRNA	Up-regulated	2.95188	8.42e-33
ENSG00000163507	CIP2A	Protein_Coding	Down-regulated	-2.4105	1.3e-32
ENSG00000173805	HAP1	Protein_Coding	Up-regulated	4.91483	1.3e-32
ENSG00000166106	ADAMTS15	Protein_Coding	Up-regulated	2.67445	1.42e-32
ENSG00000141127	PRPSAP2	Protein_Coding	Up-regulated	2.02611	1.57e-32
ENSG00000264672	SEPTIN4-AS1	lncRNA	Up-regulated	5.21937	1.63e-32
ENSG00000165304	MELK	Protein_Coding	Down-regulated	-1.66657	1.66e-32
ENSG00000160917	CPSF4	Protein_Coding	Up-regulated	1.59679	2.32e-32
ENSG00000130176	CNN1	Protein_Coding	Down-regulated	-2.03957	2.8e-32
ENSG00000203760	CENPW	Protein_Coding	Down-regulated	-2.1294	3.49e-32
ENSG00000266208	GJD3-AS1	lncRNA	Up-regulated	1.92933	4.47e-32
ENSG00000159251	ACTC1	Protein_Coding	Down-regulated	-3.03697	5.94e-32
ENSG00000289047	ENSG00000289047	lncRNA	Up-regulated	1.86793	6e-32
ENSG00000134504	KCTD1	Protein_Coding	Up-regulated	1.75309	6.46e-32
ENSG00000197903	H2BC12	Protein_Coding	Up-regulated	1.95777	6.49e-32
ENSG00000136122	BORA	Protein_Coding	Down-regulated	-3.2133	6.66e-32
ENSG00000162783	IER5	Protein_Coding	Up-regulated	1.33271	8.13e-32
ENSG00000093009	CDC45	Protein_Coding	Down-regulated	-1.63718	8.34e-32
ENSG00000169750	RAC3	Protein_Coding	Down-regulated	-2.9893	9.25e-32
ENSG00000260641	TSPAN5-DT	lncRNA	Up-regulated	3.69874	1.11e-31
ENSG00000213694	S1PR3	Protein_Coding	Up-regulated	1.25747	1.13e-31
ENSG00000257702	LBX2-AS1	lncRNA	Up-regulated	2.11997	1.17e-31
ENSG00000071626	DAZAP1	Protein_Coding	Down-regulated	-1.25657	1.95e-31
ENSG00000103742	IGDCC4	Protein_Coding	Up-regulated	3.13654	2.7e-31
ENSG00000167553	TUBA1C	Protein_Coding	Down-regulated	-1.82332	4.23e-31
ENSG00000244509	APOBEC3C	Protein_Coding	Up-regulated	1.70024	4.34e-31
ENSG00000131459	GFPT2	Protein_Coding	Up-regulated	1.84832	4.53e-31
ENSG00000112378	PERP	Protein_Coding	Up-regulated	1.62455	4.6e-31
ENSG00000176641	RNF152	Protein_Coding	Down-regulated	-1.32111	5.95e-31
ENSG00000257953	ENSG00000257953	lncRNA	Up-regulated	9.30679	6.44e-31
ENSG00000166130	IKBIP	Protein_Coding	Up-regulated	1.50764	6.69e-31
ENSG00000153162	BMP6	Protein_Coding	Up-regulated	3.40302	7.07e-31
ENSG00000149547	EI24	Protein_Coding	Up-regulated	1.50319	7.28e-31
ENSG00000184254	ALDH1A3	Protein_Coding	Up-regulated	2.04987	7.8e-31
ENSG00000056736	IL17RB	Protein_Coding	Up-regulated	5.12395	1e-30
ENSG00000214517	PPME1	Protein_Coding	Up-regulated	1.88656	1.06e-30
ENSG00000163808	KIF15	Protein_Coding	Down-regulated	-2.68077	1.18e-30
ENSG00000170734	POLH	Protein_Coding	Up-regulated	1.42093	1.2e-30
ENSG00000175600	SUGCT	Protein_Coding	Up-regulated	1.7	1.56e-30
ENSG00000173193	PARP14	Protein_Coding	Up-regulated	1.42557	1.62e-30
ENSG00000204389	HSPA1A	Protein_Coding	Down-regulated	-1.35622	1.65e-30
ENSG00000119537	KDSR	Protein_Coding	Up-regulated	1.2444	2.17e-30
ENSG00000237512	UNC5B-AS1	lncRNA	Up-regulated	3.00123	2.41e-30
ENSG00000183779	ZNF703	Protein_Coding	Up-regulated	1.27297	2.6e-30
ENSG00000255717	SNHG1	lncRNA	Up-regulated	1.93197	2.94e-30
ENSG00000186318	BACE1	Protein_Coding	Up-regulated	1.21121	3.41e-30
ENSG00000278828	H3C10	Protein_Coding	Up-regulated	3.13033	3.5e-30
ENSG00000168078	PBK	Protein_Coding	Down-regulated	-3.03905	3.53e-30
ENSG00000124067	SLC12A4	Protein_Coding	Up-regulated	1.64229	3.92e-30
ENSG00000168811	IL12A	Protein_Coding	Up-regulated	3.50317	3.92e-30
ENSG00000102554	KLF5	Protein_Coding	Up-regulated	1.9706	7.24e-30
ENSG00000105963	ADAP1	Protein_Coding	Down-regulated	-2.47691	7.49e-30
ENSG00000185507	IRF7	Protein_Coding	Up-regulated	1.54537	7.55e-30
ENSG00000136695	IL36RN	Protein_Coding	Up-regulated	3.82234	8.36e-30
ENSG00000196072	BLOC1S2	Protein_Coding	Up-regulated	1.6982	1.45e-29
ENSG00000175197	DDIT3	Protein_Coding	Up-regulated	2.15526	1.52e-29
ENSG00000167110	GOLGA2	Protein_Coding	Down-regulated	-1.31771	2e-29
ENSG00000167772	ANGPTL4	Protein_Coding	Down-regulated	-1.32288	2.28e-29
ENSG00000145882	PCYOX1L	Protein_Coding	Up-regulated	1.72507	2.47e-29
ENSG00000108384	RAD51C	Protein_Coding	Up-regulated	1.67134	2.92e-29
ENSG00000249859	PVT1	lncRNA	Up-regulated	1.84201	2.99e-29
ENSG00000147813	NAPRT	Protein_Coding	Down-regulated	-2.21924	3.06e-29
ENSG00000288873	ENSG00000288873	lncRNA	Up-regulated	2.35768	3.43e-29
ENSG00000081087	OSTM1	Protein_Coding	Up-regulated	1.78128	3.82e-29
ENSG00000100065	CARD10	Protein_Coding	Up-regulated	1.99171	3.96e-29
ENSG00000144554	FANCD2	Protein_Coding	Down-regulated	-2.94491	4.61e-29
ENSG00000183153	GJD3	Protein_Coding	Up-regulated	2.00423	5.54e-29
ENSG00000272468	ENSG00000272468	lncRNA	Up-regulated	2.72578	7.06e-29
ENSG00000080823	MOK	Protein_Coding	Down-regulated	-2.2081	7.35e-29
ENSG00000154027	AK5	Protein_Coding	Down-regulated	-1.35371	8.41e-29
ENSG00000112149	CD83	Protein_Coding	Up-regulated	2.05772	8.82e-29
ENSG00000101945	SUV39H1	Protein_Coding	Down-regulated	-1.76681	9.42e-29
ENSG00000131711	MAP1B	Protein_Coding	Down-regulated	-2.29542	9.54e-29
ENSG00000163431	LMOD1	Protein_Coding	Down-regulated	-2.23318	1e-28
ENSG00000139734	DIAPH3	Protein_Coding	Down-regulated	-2.10453	1.03e-28
ENSG00000076928	ARHGEF1	Protein_Coding	Down-regulated	-1.29111	1.16e-28
ENSG00000120278	PLEKHG1	Protein_Coding	Up-regulated	9.21956	1.53e-28
ENSG00000290792	ENSG00000290792	lncRNA	Up-regulated	2.69322	1.62e-28
ENSG00000140464	PML	Protein_Coding	Up-regulated	1.18463	1.64e-28
ENSG00000179855	GIPC3	Protein_Coding	Down-regulated	-2.64867	1.77e-28
ENSG00000121690	DEPDC7	Protein_Coding	Up-regulated	2.17979	2.09e-28
ENSG00000142347	MYO1F	Protein_Coding	Down-regulated	-3.49938	2.22e-28
ENSG00000138675	FGF5	Protein_Coding	Down-regulated	-1.88693	2.73e-28
ENSG00000204103	MAFB	Protein_Coding	Up-regulated	2.8598	3.69e-28
ENSG00000122952	ZWINT	Protein_Coding	Down-regulated	-1.30396	3.82e-28
ENSG00000178685	PARP10	Protein_Coding	Up-regulated	1.48054	3.94e-28
ENSG00000149218	ENDOD1	Protein_Coding	Up-regulated	1.64261	4.02e-28
ENSG00000130164	LDLR	Protein_Coding	Down-regulated	-1.89461	4.07e-28
ENSG00000161800	RACGAP1	Protein_Coding	Down-regulated	-1.79524	4.4e-28
ENSG00000185347	TEDC1	Protein_Coding	Down-regulated	-1.77761	4.52e-28
ENSG00000120913	PDLIM2	Protein_Coding	Down-regulated	-1.87363	4.69e-28
ENSG00000106992	AK1	Protein_Coding	Up-regulated	1.68619	4.81e-28
ENSG00000054118	THRAP3	Protein_Coding	Down-regulated	-1.38854	5.51e-28
ENSG00000183010	PYCR1	Protein_Coding	Down-regulated	-1.36963	7.66e-28
ENSG00000156486	KCNS2	Protein_Coding	Up-regulated	2.20051	1.01e-27
ENSG00000163882	POLR2H	Protein_Coding	Up-regulated	1.24096	1.24e-27
ENSG00000140534	TICRR	Protein_Coding	Down-regulated	-2.19611	1.47e-27
ENSG00000104450	SPAG1	Protein_Coding	Up-regulated	2.08021	1.59e-27
ENSG00000103495	MAZ	Protein_Coding	Down-regulated	-1.36525	1.62e-27
ENSG00000154642	C21orf91	Protein_Coding	Up-regulated	1.99399	1.67e-27
ENSG00000124145	SDC4	Protein_Coding	Up-regulated	1.32794	1.79e-27
ENSG00000092853	CLSPN	Protein_Coding	Down-regulated	-1.35676	2.16e-27
ENSG00000105928	GSDME	Protein_Coding	Up-regulated	1.35645	2.6e-27
ENSG00000125753	VASP	Protein_Coding	Down-regulated	-1.34005	3.01e-27
ENSG00000198854	C1orf68	Protein_Coding	Up-regulated	9.29851	3.06e-27
ENSG00000110492	MDK	Protein_Coding	Up-regulated	1.41102	3.09e-27
ENSG00000184371	CSF1	Protein_Coding	Up-regulated	1.22816	3.2e-27
ENSG00000181218	H2AC25	Protein_Coding	Up-regulated	1.82101	3.38e-27
ENSG00000115738	ID2	Protein_Coding	Up-regulated	1.18473	3.53e-27
ENSG00000065809	FAM107B	Protein_Coding	Up-regulated	1.30541	3.87e-27
ENSG00000182612	TSPAN10	Protein_Coding	Up-regulated	1.68518	4.17e-27
ENSG00000246705	H2AJ	Protein_Coding	Up-regulated	1.14626	4.39e-27
ENSG00000136811	ODF2	Protein_Coding	Down-regulated	-1.43991	4.69e-27
ENSG00000142731	PLK4	Protein_Coding	Down-regulated	-2.7359	5.51e-27
ENSG00000129566	TEP1	Protein_Coding	Up-regulated	1.57601	5.94e-27
ENSG00000138271	GPR87	Protein_Coding	Up-regulated	9.12649	6.12e-27
ENSG00000231811	ENSG00000231811	lncRNA	Up-regulated	6.07077	6.5e-27
ENSG00000139438	FAM222A	Protein_Coding	Up-regulated	2.49869	7.46e-27
ENSG00000198947	DMD	Protein_Coding	Up-regulated	2.54183	7.99e-27
ENSG00000148516	ZEB1	Protein_Coding	Down-regulated	-1.48925	8.15e-27
ENSG00000273084	ENSG00000273084	lncRNA	Up-regulated	3.22035	8.84e-27
ENSG00000100167	SEPTIN3	Protein_Coding	Up-regulated	2.7472	9.26e-27
ENSG00000271601	LIX1L	Protein_Coding	Down-regulated	-1.32007	1.08e-26
ENSG00000287750	LINC03026	lncRNA	Up-regulated	3.75903	1.17e-26
ENSG00000027869	SH2D2A	Protein_Coding	Up-regulated	3.87639	1.25e-26
ENSG00000183943	PRKX	Protein_Coding	Up-regulated	1.58521	1.51e-26
ENSG00000106123	EPHB6	Protein_Coding	Up-regulated	2.37051	1.53e-26
ENSG00000123643	SLC36A1	Protein_Coding	Up-regulated	1.51665	1.57e-26
ENSG00000233695	GAS6-AS1	lncRNA	Up-regulated	3.34064	1.77e-26
ENSG00000006283	CACNA1G	Protein_Coding	Up-regulated	2.60363	2.04e-26
ENSG00000157110	RBPMS	Protein_Coding	Down-regulated	-1.23182	2.13e-26
ENSG00000176619	LMNB2	Protein_Coding	Down-regulated	-1.20777	2.21e-26
ENSG00000114166	KAT2B	Protein_Coding	Up-regulated	1.90868	2.22e-26
ENSG00000171540	OTP	Protein_Coding	Up-regulated	9.12664	3.33e-26
ENSG00000213654	GPSM3	Protein_Coding	Down-regulated	-1.88865	3.61e-26
ENSG00000111674	ENO2	Protein_Coding	Down-regulated	-1.19191	3.64e-26
ENSG00000234546	LNCTAM34A	lncRNA	Up-regulated	2.52474	3.65e-26
ENSG00000135604	STX11	Protein_Coding	Up-regulated	2.88195	4.03e-26
ENSG00000100647	SUSD6	Protein_Coding	Up-regulated	1.32985	4.3e-26
ENSG00000148344	PTGES	Protein_Coding	Up-regulated	2.03974	5.66e-26
ENSG00000109854	HTATIP2	Protein_Coding	Up-regulated	1.44516	5.91e-26
ENSG00000162614	NEXN	Protein_Coding	Down-regulated	-1.57344	8.07e-26
ENSG00000266680	ENSG00000266680	lncRNA	Up-regulated	3.51059	8.53e-26
ENSG00000145730	PAM	Protein_Coding	Up-regulated	1.27996	9.85e-26
ENSG00000127663	KDM4B	Protein_Coding	Up-regulated	1.4093	1.05e-25
ENSG00000101210	EEF1A2	Protein_Coding	Down-regulated	-1.79794	1.1e-25
ENSG00000110375	UPK2	Protein_Coding	Up-regulated	3.27418	1.26e-25
ENSG00000005469	CROT	Protein_Coding	Up-regulated	1.65577	1.31e-25
ENSG00000197299	BLM	Protein_Coding	Down-regulated	-2.89961	1.38e-25
ENSG00000113504	SLC12A7	Protein_Coding	Up-regulated	1.70722	1.41e-25
ENSG00000143333	RGS16	Protein_Coding	Up-regulated	4.38283	1.42e-25
ENSG00000179820	MYADM	Protein_Coding	Down-regulated	-1.62696	1.42e-25
ENSG00000103044	HAS3	Protein_Coding	Up-regulated	3.75842	1.54e-25
ENSG00000147592	LACTB2	Protein_Coding	Up-regulated	1.72319	1.63e-25
ENSG00000256235	SMIM3	Protein_Coding	Up-regulated	1.41587	1.91e-25
ENSG00000063660	GPC1	Protein_Coding	Up-regulated	1.71067	2.05e-25
ENSG00000149557	FEZ1	Protein_Coding	Up-regulated	1.31363	3.07e-25
ENSG00000167904	TMEM68	Protein_Coding	Up-regulated	1.5746	3.07e-25
ENSG00000173442	EHBP1L1	Protein_Coding	Down-regulated	-1.19079	3.52e-25
ENSG00000164109	MAD2L1	Protein_Coding	Down-regulated	-2.02398	3.65e-25
ENSG00000146247	PHIP	Protein_Coding	Down-regulated	-1.872	3.95e-25
ENSG00000099282	TSPAN15	Protein_Coding	Down-regulated	-1.70116	4.12e-25
ENSG00000086544	ITPKC	Protein_Coding	Up-regulated	1.75432	4.25e-25
ENSG00000023902	PLEKHO1	Protein_Coding	Down-regulated	-1.25484	4.43e-25
ENSG00000138686	BBS7	Protein_Coding	Up-regulated	1.76493	4.55e-25
ENSG00000123610	TNFAIP6	Protein_Coding	Up-regulated	2.35431	4.61e-25
ENSG00000101057	MYBL2	Protein_Coding	Down-regulated	-1.22673	5.21e-25
ENSG00000156113	KCNMA1	Protein_Coding	Down-regulated	-1.10338	5.48e-25
ENSG00000178150	ZNF114	Protein_Coding	Up-regulated	4.00216	5.73e-25
ENSG00000185745	IFIT1	Protein_Coding	Up-regulated	1.30434	5.85e-25
ENSG00000137819	PAQR5	Protein_Coding	Up-regulated	1.73295	6.23e-25
ENSG00000171960	PPIH	Protein_Coding	Down-regulated	-1.58624	6.52e-25
ENSG00000183287	CCBE1	Protein_Coding	Down-regulated	-1.32364	6.61e-25
ENSG00000205978	NYNRIN	Protein_Coding	Up-regulated	1.80418	7.28e-25
ENSG00000273802	H2BC8	Protein_Coding	Up-regulated	3.84274	7.72e-25
ENSG00000117280	RAB29	Protein_Coding	Up-regulated	1.9777	8.09e-25
ENSG00000229950	TFAP2A-AS1	lncRNA	Up-regulated	2.39401	8.47e-25
ENSG00000143575	HAX1	Protein_Coding	Down-regulated	-1.17089	8.81e-25
ENSG00000143314	MRPL24	Protein_Coding	Down-regulated	-1.28799	8.91e-25
ENSG00000167900	TK1	Protein_Coding	Down-regulated	-1.11723	9.09e-25
ENSG00000170271	FAXDC2	Protein_Coding	Up-regulated	2.33592	1.2e-24
ENSG00000108848	LUC7L3	Protein_Coding	Down-regulated	-1.408	1.23e-24
ENSG00000169908	TM4SF1	Protein_Coding	Down-regulated	-1.56496	1.33e-24
ENSG00000109881	CCDC34	Protein_Coding	Down-regulated	-1.80061	1.4e-24
ENSG00000258655	ARHGAP5-AS1	lncRNA	Up-regulated	2.4238	1.42e-24
ENSG00000171824	EXOSC10	Protein_Coding	Down-regulated	-1.1454	1.94e-24
ENSG00000166578	IQCD	Protein_Coding	Up-regulated	2.05169	2.08e-24
ENSG00000179630	LACC1	Protein_Coding	Up-regulated	1.83852	2.11e-24
ENSG00000010292	NCAPD2	Protein_Coding	Down-regulated	-1.22978	2.14e-24
ENSG00000213853	EMP2	Protein_Coding	Down-regulated	-1.26185	2.74e-24
ENSG00000165072	MAMDC2	Protein_Coding	Up-regulated	2.13933	3.68e-24
ENSG00000131634	TMEM204	Protein_Coding	Down-regulated	-1.32759	3.81e-24
ENSG00000101849	TBL1X	Protein_Coding	Down-regulated	-1.45889	3.84e-24
ENSG00000185885	IFITM1	Protein_Coding	Up-regulated	1.27379	3.85e-24
ENSG00000151692	RNF144A	Protein_Coding	Up-regulated	2.47304	4.07e-24
ENSG00000204219	TCEA3	Protein_Coding	Up-regulated	1.43183	4.68e-24
ENSG00000147100	SLC16A2	Protein_Coding	Up-regulated	1.13625	5e-24
ENSG00000111348	ARHGDIB	Protein_Coding	Down-regulated	-2.24578	5.14e-24
ENSG00000074527	NTN4	Protein_Coding	Up-regulated	1.85603	5.26e-24
ENSG00000164056	SPRY1	Protein_Coding	Up-regulated	3.39504	5.36e-24
ENSG00000163251	FZD5	Protein_Coding	Up-regulated	2.50218	5.37e-24
ENSG00000060138	YBX3	Protein_Coding	Up-regulated	1.55744	5.45e-24
ENSG00000136628	EPRS1	Protein_Coding	Down-regulated	-1.38828	5.49e-24
ENSG00000153714	LURAP1L	Protein_Coding	Up-regulated	1.74616	5.49e-24
ENSG00000169105	CHST14	Protein_Coding	Up-regulated	1.09436	5.5e-24
ENSG00000185614	INKA1	Protein_Coding	Up-regulated	2.37565	5.64e-24
ENSG00000159164	SV2A	Protein_Coding	Down-regulated	-1.51263	5.95e-24
ENSG00000170430	MGMT	Protein_Coding	Down-regulated	-1.78639	6.01e-24
ENSG00000176692	FOXC2	Protein_Coding	Up-regulated	1.8868	6.01e-24
ENSG00000138092	CENPO	Protein_Coding	Down-regulated	-1.55427	6.09e-24
ENSG00000173457	PPP1R14B	Protein_Coding	Down-regulated	-1.19206	6.29e-24
ENSG00000116209	TMEM59	Protein_Coding	Up-regulated	1.16567	6.77e-24
ENSG00000132424	PNISR	Protein_Coding	Down-regulated	-1.42403	7.7e-24
ENSG00000197415	VEPH1	Protein_Coding	Down-regulated	-1.8485	8.44e-24
ENSG00000121957	GPSM2	Protein_Coding	Down-regulated	-1.63747	9.36e-24
ENSG00000003056	M6PR	Protein_Coding	Up-regulated	1.23792	9.5e-24
ENSG00000214513	NOTO	Protein_Coding	Up-regulated	8.89814	1.08e-23
ENSG00000177551	NHLH2	Protein_Coding	Up-regulated	6.61483	1.31e-23
ENSG00000147853	AK3	Protein_Coding	Up-regulated	1.38974	1.34e-23
ENSG00000183486	MX2	Protein_Coding	Up-regulated	1.66646	1.38e-23
ENSG00000168014	C2CD3	Protein_Coding	Up-regulated	1.62981	1.41e-23
ENSG00000146411	SLC2A12	Protein_Coding	Up-regulated	3.14847	1.57e-23
ENSG00000158769	F11R	Protein_Coding	Up-regulated	2.60772	1.64e-23
ENSG00000213859	KCTD11	Protein_Coding	Up-regulated	1.45681	1.68e-23
ENSG00000174807	CD248	Protein_Coding	Down-regulated	-1.88972	1.76e-23
ENSG00000162576	MXRA8	Protein_Coding	Down-regulated	-1.39497	2.15e-23
ENSG00000069011	PITX1	Protein_Coding	Down-regulated	-1.61785	2.29e-23
ENSG00000104983	CCDC61	Protein_Coding	Down-regulated	-1.74674	2.35e-23
ENSG00000271811	ENSG00000271811	lncRNA	Down-regulated	-2.32358	2.44e-23
ENSG00000187837	H1-2	Protein_Coding	Up-regulated	1.4204	2.55e-23
ENSG00000136867	SLC31A2	Protein_Coding	Up-regulated	1.67626	2.79e-23
ENSG00000171208	NETO2	Protein_Coding	Up-regulated	1.32019	2.8e-23
ENSG00000090530	P3H2	Protein_Coding	Up-regulated	1.11016	2.95e-23
ENSG00000178695	KCTD12	Protein_Coding	Up-regulated	1.56023	3.65e-23
ENSG00000133315	MACROD1	Protein_Coding	Down-regulated	-1.74627	3.67e-23
ENSG00000142453	CARM1	Protein_Coding	Down-regulated	-1.16771	3.74e-23
ENSG00000140443	IGF1R	Protein_Coding	Up-regulated	1.34834	4.04e-23
ENSG00000109670	FBXW7	Protein_Coding	Up-regulated	1.73231	4.11e-23
ENSG00000164764	SBSPON	Protein_Coding	Up-regulated	3.87855	4.52e-23
ENSG00000145779	TNFAIP8	Protein_Coding	Up-regulated	1.55201	5.54e-23
ENSG00000103024	NME3	Protein_Coding	Down-regulated	-1.87083	5.82e-23
ENSG00000137880	GCHFR	Protein_Coding	Up-regulated	2.15764	6.35e-23
ENSG00000170498	KISS1	Protein_Coding	Down-regulated	-1.49958	6.48e-23
ENSG00000083812	ZNF324	Protein_Coding	Up-regulated	1.64432	6.54e-23
ENSG00000232859	LYRM9	Protein_Coding	Up-regulated	3.16913	6.99e-23
ENSG00000112773	TENT5A	Protein_Coding	Up-regulated	1.16658	7.08e-23
ENSG00000225968	ELFN1	Protein_Coding	Up-regulated	1.62634	8.36e-23
ENSG00000153531	ADPRHL1	Protein_Coding	Up-regulated	1.8621	9.58e-23
ENSG00000091436	MAP3K20	Protein_Coding	Down-regulated	-1.23789	1.05e-22
ENSG00000119707	RBM25	Protein_Coding	Down-regulated	-1.53007	1.07e-22
ENSG00000166451	CENPN	Protein_Coding	Down-regulated	-1.39947	1.21e-22
ENSG00000227268	KLLN	Protein_Coding	Up-regulated	3.01907	1.21e-22
ENSG00000129038	LOXL1	Protein_Coding	Down-regulated	-1.1955	1.24e-22
ENSG00000104320	NBN	Protein_Coding	Down-regulated	-1.41868	1.55e-22
ENSG00000101782	RIOK3	Protein_Coding	Up-regulated	1.49602	1.75e-22
ENSG00000184897	H1-10	Protein_Coding	Down-regulated	-1.39366	2.07e-22
ENSG00000272288	ILRUN-AS1	lncRNA	Up-regulated	2.76714	2.12e-22
ENSG00000228253	MT-ATP8	Protein_Coding	Down-regulated	-2.10739	2.14e-22
ENSG00000158417	EIF5B	Protein_Coding	Down-regulated	-1.58534	2.17e-22
ENSG00000113231	PDE8B	Protein_Coding	Down-regulated	-2.61406	2.41e-22
ENSG00000159884	CCDC107	Protein_Coding	Down-regulated	-1.4312	2.48e-22
ENSG00000164366	CCDC127	Protein_Coding	Down-regulated	-1.50521	2.56e-22
ENSG00000135823	STX6	Protein_Coding	Up-regulated	1.38437	2.63e-22
ENSG00000253293	HOXA10	Protein_Coding	Up-regulated	1.20238	2.89e-22
ENSG00000147408	CSGALNACT1	Protein_Coding	Up-regulated	1.98943	2.94e-22
ENSG00000148339	SLC25A25	Protein_Coding	Up-regulated	1.32808	2.98e-22
ENSG00000277972	CISD3	Protein_Coding	Down-regulated	-1.33197	3e-22
ENSG00000291144	ENSG00000291144	lncRNA	Up-regulated	8.90952	3.12e-22
ENSG00000138385	SSB	Protein_Coding	Down-regulated	-1.23673	3.19e-22
ENSG00000132718	SYT11	Protein_Coding	Up-regulated	1.51475	3.48e-22
ENSG00000169184	MN1	Protein_Coding	Up-regulated	2.68791	4.13e-22
ENSG00000115211	EIF2B4	Protein_Coding	Down-regulated	-1.21862	4.57e-22
ENSG00000180660	MAB21L1	Protein_Coding	Up-regulated	1.59437	4.74e-22
ENSG00000257839	PHLDA1-DT	lncRNA	Up-regulated	8.82914	4.74e-22
ENSG00000198722	UNC13B	Protein_Coding	Up-regulated	1.35038	4.75e-22
ENSG00000135677	GNS	Protein_Coding	Up-regulated	1.19113	4.83e-22
ENSG00000232774	LINC03033	lncRNA	Up-regulated	6.78007	4.98e-22
ENSG00000204160	ZDHHC18	Protein_Coding	Down-regulated	-1.26802	5.34e-22
ENSG00000131351	HAUS8	Protein_Coding	Down-regulated	-1.48524	5.6e-22
ENSG00000037241	RPL26L1	Protein_Coding	Down-regulated	-1.40297	5.73e-22
ENSG00000179588	ZFPM1	Protein_Coding	Up-regulated	1.59465	7.11e-22
ENSG00000184979	USP18	Protein_Coding	Up-regulated	1.90101	8.45e-22
ENSG00000108688	CCL7	Protein_Coding	Up-regulated	1.75053	8.8e-22
ENSG00000188706	ZDHHC9	Protein_Coding	Up-regulated	1.13326	8.8e-22
ENSG00000141448	GATA6	Protein_Coding	Up-regulated	3.44733	1.01e-21
ENSG00000159212	CLIC6	Protein_Coding	Up-regulated	3.65763	1.07e-21
ENSG00000101928	MOSPD1	Protein_Coding	Up-regulated	1.54555	1.12e-21
ENSG00000149577	SIDT2	Protein_Coding	Up-regulated	1.28489	1.23e-21
ENSG00000121039	RDH10	Protein_Coding	Up-regulated	1.96553	1.28e-21
ENSG00000142627	EPHA2	Protein_Coding	Up-regulated	1.27089	1.43e-21
ENSG00000100629	CEP128	Protein_Coding	Down-regulated	-2.68812	1.67e-21
ENSG00000168268	NT5DC2	Protein_Coding	Down-regulated	-1.18736	1.75e-21
ENSG00000029534	ANK1	Protein_Coding	Up-regulated	1.45872	1.85e-21
ENSG00000105643	ARRDC2	Protein_Coding	Up-regulated	1.48633	2.09e-21
ENSG00000169067	ACTBL2	Protein_Coding	Up-regulated	4.54408	2.2e-21
ENSG00000051341	POLQ	Protein_Coding	Down-regulated	-2.69138	2.27e-21
ENSG00000134668	SPOCD1	Protein_Coding	Down-regulated	-1.127	2.37e-21
ENSG00000125652	ALKBH7	Protein_Coding	Down-regulated	-1.51511	2.45e-21
ENSG00000198576	ARC	Protein_Coding	Up-regulated	2.97226	2.8e-21
ENSG00000171552	BCL2L1	Protein_Coding	Up-regulated	1.07763	3.1e-21
ENSG00000180596	H2BC4	Protein_Coding	Up-regulated	2.81129	3.37e-21
ENSG00000107833	NPM3	Protein_Coding	Down-regulated	-1.57358	3.6e-21
ENSG00000138356	AOX1	Protein_Coding	Up-regulated	1.45517	3.6e-21
ENSG00000182687	GALR2	Protein_Coding	Up-regulated	3.20973	3.85e-21
ENSG00000162645	GBP2	Protein_Coding	Down-regulated	-1.73866	3.94e-21
ENSG00000137033	IL33	Protein_Coding	Up-regulated	2.96632	4.12e-21
ENSG00000152894	PTPRK	Protein_Coding	Up-regulated	1.258	4.12e-21
ENSG00000145934	TENM2	Protein_Coding	Down-regulated	-3.11413	4.32e-21
ENSG00000143545	RAB13	Protein_Coding	Down-regulated	-1.56762	4.41e-21
ENSG00000168439	STIP1	Protein_Coding	Down-regulated	-1.3515	4.61e-21
ENSG00000280206	ENSG00000280206	lncRNA	Down-regulated	-2.12313	4.66e-21
ENSG00000008441	NFIX	Protein_Coding	Down-regulated	-1.22608	4.7e-21
ENSG00000153094	BCL2L11	Protein_Coding	Up-regulated	2.34775	4.72e-21
ENSG00000162981	LRATD1	Protein_Coding	Up-regulated	5.67313	4.96e-21
ENSG00000257219	LNCOG	lncRNA	Up-regulated	1.71989	5.56e-21
ENSG00000158859	ADAMTS4	Protein_Coding	Down-regulated	-1.3373	5.67e-21
ENSG00000160703	NLRX1	Protein_Coding	Up-regulated	1.19033	6.36e-21
ENSG00000186642	PDE2A	Protein_Coding	Up-regulated	4.15227	6.68e-21
ENSG00000119403	PHF19	Protein_Coding	Down-regulated	-1.20183	6.9e-21
ENSG00000170464	DNAJC18	Protein_Coding	Up-regulated	1.41666	7.01e-21
ENSG00000127329	PTPRB	Protein_Coding	Up-regulated	2.62679	7.02e-21
ENSG00000139211	AMIGO2	Protein_Coding	Up-regulated	1.34463	7.02e-21
ENSG00000203805	PLPP4	Protein_Coding	Up-regulated	1.61413	7.1e-21
ENSG00000167552	TUBA1A	Protein_Coding	Down-regulated	-1.23675	7.41e-21
ENSG00000145833	DDX46	Protein_Coding	Down-regulated	-1.2384	7.7e-21
ENSG00000150551	LYPD1	Protein_Coding	Up-regulated	2.14396	7.7e-21
ENSG00000187678	SPRY4	Protein_Coding	Down-regulated	-1.05197	7.85e-21
ENSG00000116478	HDAC1	Protein_Coding	Down-regulated	-1.10558	8.14e-21
ENSG00000131015	ULBP2	Protein_Coding	Up-regulated	1.49949	8.4e-21
ENSG00000224592	MIR3659HG	lncRNA	Up-regulated	8.69306	8.47e-21
ENSG00000120699	EXOSC8	Protein_Coding	Down-regulated	-1.30976	8.56e-21
ENSG00000152782	PANK1	Protein_Coding	Up-regulated	2.24544	8.86e-21
ENSG00000029363	BCLAF1	Protein_Coding	Down-regulated	-1.26291	1.01e-20
ENSG00000143367	TUFT1	Protein_Coding	Up-regulated	1.46346	1.01e-20
ENSG00000106355	LSM5	Protein_Coding	Down-regulated	-1.65928	1.1e-20
ENSG00000179750	APOBEC3B	Protein_Coding	Down-regulated	-1.66937	1.14e-20
ENSG00000170791	CHCHD7	Protein_Coding	Up-regulated	1.34171	1.15e-20
ENSG00000176490	DIRAS1	Protein_Coding	Down-regulated	-1.78796	1.21e-20
ENSG00000132646	PCNA	Protein_Coding	Up-regulated	1.43618	1.24e-20
ENSG00000064490	RFXANK	Protein_Coding	Down-regulated	-1.21499	1.34e-20
ENSG00000136048	DRAM1	Protein_Coding	Up-regulated	1.07528	1.35e-20
ENSG00000113070	HBEGF	Protein_Coding	Up-regulated	1.40989	1.45e-20
ENSG00000198055	GRK6	Protein_Coding	Down-regulated	-1.20221	1.47e-20
ENSG00000153029	MR1	Protein_Coding	Up-regulated	1.49399	1.62e-20
ENSG00000174307	PHLDA3	Protein_Coding	Up-regulated	1.13749	1.64e-20
ENSG00000171604	CXXC5	Protein_Coding	Down-regulated	-1.29931	1.65e-20
ENSG00000066583	ISOC1	Protein_Coding	Up-regulated	1.41806	1.76e-20
ENSG00000102387	TAF7L	Protein_Coding	Up-regulated	3.62608	1.76e-20
ENSG00000169744	LDB2	Protein_Coding	Down-regulated	-2.35599	1.81e-20
ENSG00000186815	TPCN1	Protein_Coding	Up-regulated	1.3527	2.12e-20
ENSG00000173821	RNF213	Protein_Coding	Up-regulated	1.16635	2.18e-20
[truncated: 2,838 more rows]

## Sheet: Table_S5
Supplementary Table S5. List of differentially expressed protein-coding and lncRNA genes in DOX-treated cells compared to the control cells (HFFs with CRISPR-mediated p130 and RB1 knockouts, and siRNA-mediated p107 knockdown, GSE135842).
[truncated: 160 more rows]

[truncated: 13 more sheets: Table_S6, Table_S7, Table_S8, Table_S9, Table_S10, Table_S11, Table_S12, Table_S13, Table_S14, Table_S15, Table_S16, Table_S17, Table_S18]
